# Supplementary material for: 7,8-Dihydroxyflavone is a direct inhibitor of human and murine pyridoxal phosphatase
Source: eLife journal article supplement (doi:10.7554/elife.93094), 2024-01-04
Supplement: fig2-data5 [file Brenner_Figure_2figure_supplement_2.docx]

|  | **InChI Key** | **IC50 [µM]** |
| --- | --- | --- |
| 7,8-DHF | COCYGNDCWFKTMF-UHFFFAOYSA-N | 0.8 * |
|  | RDMYXZLESVAHOO-UHFFFAOYSA-N | >40 |
|  | RBZAGLIUHTVMFL-UHFFFAOYSA-N | >40 |
|  | HSJXOMZEPTVVQC-UHFFFAOYSA-N | >40 |
|  | PRAORRBPQXAGQD-UHFFFAOYSA-N | >40 |
|  | BMXOLQCTPIQVOD-UHFFFAOYSA-N | >40 |
|  | GYJACFGQPFXKCA-UHFFFAOYSA-N | >40 |
|  | PCRFOVGMSDFVLC-UHFFFAOYSA-N | >40 |
|  | FHXDSQYFCFWKAW-UHFFFAOYSA-N | >40 |
|  | OPTDAYWBFJRIGB-UHFFFAOYSA-N | >40 |
|  | GCUCIFQCGJIRNT-UHFFFAOYSA-N | >40 |
