# Supplementary material for: 7,8-Dihydroxyflavone is a direct inhibitor of human and murine pyridoxal phosphatase
Source: eLife. 2024 Jun 10;13:RP93094. doi: 10.7554/eLife.93094 (PMC11164532; doi:10.7554/eLife.93094)
Supplement: Figure 1—source data 1. — Densitometric quantification of pyridoxal 5’-phosphate phosphatase (PDXP), pyridoxal kinase (PDXK), and actin levels in hippocampi of PDXP-WT mice, and of PDXK and actin levels in hippocampi of knockout of PDXP (PDXP-KO) mice. [file elife-93094-fig1-data1.xlsx]

## Sheet: to Fig 1a_PDXP-WT
PDXP_PDXK in PDXP-WT			Actin normalization				PDXP normalization									PDXK normalization									PDXP_PDXK in PDXP-WT			Actin normalization				PDXP normalization									PDXK normalization
				Actin	Actin norm.			signalPDXP	PDXP norm.	actin norm.	PDXP/actin		PDXP				signal PDXK	PDXK norm.	actin norm.	PDXK/actin		PDXK							Actin	Actin norm.			signalPDXP	PDXP norm.	actin norm.	PDXP/actin		PDXP				signalPDXK	PDXK norm.	actin norm.	PDXK/actin		PDXK
blot 1		1	WT young	19092075	0.803015	1	WT young	4829418	0.314289	0.803015	0.391386		WT young	1.12404	1	WT young	16641953	0.798743	0.803015	0.99468		WT young	1.21926		blot 2		1	WT young	19393660	0.917253		WT young	4008347	0.429579	0.917253	0.468332		WT young	1.10528		WT young	20807075	0.8544	0.917253	0.931476		WT young	0.943906
		2	WT older	22608125	0.9509	2	WT older	27868317	1.81361	0.9509	1.90726		WT young	0.964388	2	WT older	24308832	1.16672	0.9509	1.22696		WT young	0.876976				2	WT older	20401539	0.964923		WT older	6585640	0.70579	0.964923	0.731448		WT young			WT older	26443489	1.08585	0.964923	1.12532		WT young
		3	WT young	26228004	1.10315	3	WT young	5692175	0.370435	1.10315	0.335797		WT young	0.98195	3	WT young	16444054	0.789244	1.10315	0.715444		WT young	1.02275				3	WT young				WT young						WT young	1.0627		WT young						WT young	1.20098
		4	WT older	26671832	1.12182	4	WT older	31257317	2.03416	1.12182	1.81327		WT young	0.929626	4	WT older	30486125	1.4632	1.12182	1.30431		WT young	0.881022				4	WT older	16836539	0.79631		WT older	5628033	0.603163	0.79631	0.757446		WT young	0.832028		WT older	27153175	1.11499	0.79631	1.40019		WT young	0.855109
		5	WT young	23306418	0.980271	5	WT young	5150225	0.335166	0.980271	0.341912		WT older	5.47753	5	WT young	17041175	0.817904	0.980271	0.834365		WT older	1.50398				5	WT young	14232296	0.673139		WT young	2828255	0.303107	0.673139	0.450289		WT older	1.72624		WT young	19428296	0.797783	0.673139	1.18517		WT older	1.14034
		6	WT older	23104711	0.971787	6	WT older	27448489	1.78629	0.971787	1.83815		WT older	5.2076	6	WT older	24914882	1.19581	0.971787	1.23052		WT older	1.5988				6	WT older	21979024	1.03953		WT older	19388246	2.07786	1.03953	1.99884		WT older	1.78759		WT older	25872832	1.06241	1.03953	1.02201		WT older	1.41888
		7	WT young	25417296	1.06905	7	WT young	5317397	0.346045	1.06905	0.323693		WT older	5.27906	7	WT young	16009296	0.768378	1.06905	0.718745		WT older	1.50835				7	WT young	20929317	0.989885		WT young	3256326	0.348984	0.989885	0.35255		WT older	4.71732		WT young	20342246	0.835313	0.989885	0.843848		WT older	1.03565
		8	WT older			8	WT older								8	WT older											8	WT older	34229924	1.61896		WT older	23621267	2.53152	1.61896	1.56367		WT older	3.69031		WT older	30422853	1.24925	1.61896	0.77164
				average actin signal				average PDXP signal			mean of young						average PDXK signal			mean of young									average actin signal				average PDXP signal			Mean of young						average PDXK signal			Mean of young
				2.37755e+07	1			1.53662e+07	1		0.348197						2.08352e+07	1		0.815809									2.11432e+07				9.33087e+06			0.423724						2.43529e+07			0.986831
								samples 1-8 loaded from left to right			lane 8 was omitted from analysis due the distortion in the gel																							samples 1-8 loaded from left to right				lane 3 was omitted from analysis due an error in the sample preparation
													anti-PDXP
																																								anti-PDXP
																			sequence of probing with antibodies, both blots:
																			1. anti-PDXP
																			2. anti-PDXK
																			3. anti-actin
													anti-PDXK																											anti-PDXK
													anti-actin
																																								anti-actin

## Sheet: to Fig 1a_PDXP-KO
PDXK in PDXP-KO			Actin normalization				PDXK normalization										PDXK in PDXP-KO		Actin normalization				PDXK normalization
				Actin signal	Actin norm.			signal PDXK	PDXK norm.	actin norm.	PDXK/actin									Actin signal	Actin norm.			signal PDXK	PDXK norm.	actin norm.	PDXK/actin
blot 1		1	KO young	25590953	0.887326	1	KO young	12528125	0.558941	0.887326	0.629917		KO young	0.910657			blot 2
		2	KO older	24683246	0.855853	2	KO older	28535832	1.27312	0.855853	1.48755		KO young	1.24031				1	KO older	24224246	0.865955	1	KO older	29726196	1.09997	0.865955	1.27024		KO young	1.28508
		3	KO young	24620125	0.853664	3	KO young	16415882	0.732393	0.853664	0.857941		KO young	1.03955				2	KO young	29950196	1.07064	2	KO young	33271610	1.23117	1.07064	1.14993		KO young	0.859668
		4	KO older	33462246	1.16025	4	KO older	34554539	1.54165	1.16025	1.32872		KO young	0.809486															KO young	0.855248
		5	KO young	27644125	0.958516	5	KO young	15448711	0.689243	0.958516	0.719073		KO older	2.15052				3	KO young	28441075	1.0167	3	KO young	21135832	0.782099	1.0167	0.769256		KO older	1.41954
		6	KO older	32139125	1.11437	6	KO older	30379418	1.35538	1.11437	1.21627		KO older	1.9209				4	KO older	27195711	0.972177	4	KO older	29375296	1.08699	0.972177	1.1181		KO older	1.24951
		7	KO young	31325368	1.08616	7	KO young	13631711	0.608178	1.08616	0.559935		KO older	1.75833				5	KO young	31491125	1.12573	5	KO young	23282125	0.86152	1.12573	0.7653		KO older	1.10511
		8	KO older	31259075	1.08386	8	KO older	27817953	1.2411	1.08386	1.14507		KO older	1.65541				6	KO older	26541782	0.948801	6	KO older	25355832	0.938254	0.948801	0.988884
				average actin signal				average PDXK signal												average actin signal
				2.88405e+07	1			2.2414e+07	1											2.7974e+07	1			2.70245e+07	1
								samples 1-8 loaded from left to right
																										samples 1-6 loaded from left to right
													anti-PDXK
																																	anti-PDXK
													anti-actin
																																	anti-actin
