# Supplementary material for: 7,8-Dihydroxyflavone is a direct inhibitor of human and murine pyridoxal phosphatase
Source: eLife. 2024 Jun 10;13:RP93094. doi: 10.7554/eLife.93094 (PMC11164532; doi:10.7554/eLife.93094)
Supplement: Figure 1—source data 2. — High-performance liquid chromatography (HPLC)-based measurements of total PLP concentrations in isolated hippocampi of PDXP-WT and PDXP-KO mice, and of protein-bound and protein-depleted PLP levels in PDXP-WT and PDXP-KO hippocampal lysates. [file elife-93094-fig1-data2.xlsx]

## Sheet: to Fig 1b and 1c
PLP Exp1										In the experiments, we used 10mg per 200µl (50g Brain per liter)
	Injection Name	Ret.Time	Area							From previous experiments, we know that 1 g brain is equivalent to 0.10786 g protein
		min	counts*min							one liter containing 50g brain tissue is equivalent to one liter containing 5.39 g protein (50*0.10786)
		Emission_1	Emission_1							To express the PLP in PLP nmol/g protein, the value in nmol/L are divided by 5.39
		[3,18..3,34]	[3,18..3,34]			PLP nM	Age (days)	PLP nmol/g protein
	WT1	3273	15070967		WT1	320.097	84	59.3557
	KO1	3257	54468057		KO1	1156.86	87	214.518
	KO2	3263	50428002		KO2	353.33	84	65.5182
	WT2	3253	16635675		WT2	1071.06	87	198.606
PLP Exp2
	Injection Name	Ret.Time	Area
		min	counts*min
		Emission_1	Emission_1
		[3,09..3,25]	[3,09..3,25]			PLP nM	Age (days)	PLP nmol/g protein		Standard curve used for Exp1-3
	WT3	3167	18662120		WT1	396.371	86	73.4991
	KO3	3170	49819612		KO3	1058.13	94	196.21		PLP (nM)	PLP	PLP Exp1	PLP Exp2	PLP mean
	WT4	3167	18890492		WT2	401.221	86	74.3986		0	0	0	0	0
	KO4	3109	53626671		KO4	1138.99	94	211.204		50	4593850	4885266	4552444	4.67719e+06
										100	9849067	9107126	9339920	9.43204e+06
PLP Exp3
	Injection Name	Ret.Time	Area
		min	counts*min
		Emission_1	Emission_1
		[2,82..2,96]	[2,82..2,96]			PLP nM	Age (days)	PLP nmol/g protein
	WT5	2893	18204337		WT5	483.31	42	89.6203
	KO5	2892	31267087		KO5	830.114	40	153.928
	WT6	2892	10744561		WT6	285.259	335	52.8957
	KO6	2892	33686161		KO6	894.339	351	165.838
PLP Exp4	including PLP protein depleted measurements
	Injection Name	Ret.Time	Area
		min	counts*min
		Emission_1	Emission_1
		[2,89..3,04]	[2,89..3,04]			PLP nM	Age (days)	PLP nmol/g protein
	WT7	2963	25548554		WT7	570.675	42	105.82
	WT8	2963	14710230		WT8	328.581	335	60.9288
	KO7	2953	40817310		KO7	911.732	34	169.063
	KO8	2960	39432368		KO8	880.796	351	163.326
	WT9	2955	25199872		WT9	562.887	42	104.376
	WT10	2961	12596060		WT10	281.357	335	52.1721
	KO9	2951	42871321		KO9	957.612	34	177.57
	KO10	2957	34338860		KO10	767.023	351	142.229
	WT11	2958	24078445		WT11	537.837	39	99.7314
	WT12	2952	15917943		WT12	355.557	335	65.9311
	KO11	2959	43614732		KO11	974.217	41	180.649
	KO12	2959	37592939		KO12	839.709	351	155.708
						PLP protein depleted
	WT7	2962	28393049		WT7	317.106	42	58.8011
	WT8	2957	10925215		WT8	122.018	335	22.6258
	KO7	2961	64228040		KO7	717.327	34	133.014
	KO8	2959	31929127		KO8	594.331	351	110.207
	WT9	2960	26925905		WT9	300.72	42	55.7627
	WT10	2962	6714022		WT10	107.122	335	19.8636
	KO9	2964	64265748		KO9	717.748	34	133.092
	KO10	2948	50328243		KO10	562.088	351	104.228
	WT11	2958	26602250		WT11	297.106	39	55.0924
	WT12	2957	6893017		WT12	128.307	335	23.792
	KO11	2952	67806468		KO11	757.293	41	140.425
	KO12	2957	56326015		KO12	629.074	351	116.649
	PLP Standard curve
	PLP 50nM	2964	4470298
	PLP 100nM	2962	8957047
PLP Exp5
	Injection Name	Ret.Time	Area
		min	counts*min
		Emission_1	Emission_1
		[2,73..2,87]	[2,73..2,87]			PLP	Age (days)	PLP nmol/g protein
	WT13	2805	31807847		WT13	667.671	94	123.806
	KO13	2818	55159736		KO13	1157.85	94	214.7
	WT14	2814	30010382		WT14	629.941	94	116.81
	KO14	2801	51694228		KO14	1085.1	94	201.211
	WT15	2803	35698574		WT15	749.34	94	138.95
	KO15	2804	59197634		KO15	1242.6	94	230.416
	PLP Standard curve
	PLP 50 nM	2809	2686463
	PLP 100 nM	2797	12883183
	PLP 200 nM	2800	20327025
	PLP 400 nM	2802	36897180
PLP Exp6	including PLP protein depleted measurements
	Injection Name	Ret.Time	Area
		min	counts*min
		Emission_1	Emission_1
		[2,81..2,96]	[2,81..2,96]			PLP nM	Age (days)	PLP nmol/g protein
	WT16	2792	21845582		WT16	450.127	252	83.4673
	KO16	2899	47178486		KO16	972.111	256	180.259
	KO17	2886	40462407		KO17	833.726	18	154.598
	WT17	2882	22449918		WT17	462.58	252	85.7763
	WT18	2892	29224880		WT18	602.178	18	111.662
	KO18	2871	48251084		KO18	994.212	256	184.357
	KO19	2891	37818907		KO19	779.257	18	144.498
	WT19	2886	20645378		WT19	425.397	252	78.8816
	WT20	2887	28817721		WT20	593.788	18	110.106
	KO20	2896	44014042		KO20	906.908	256	168.168
	KO21	2886	40500278		KO21	834.507	18	154.743
						PLP protein depleted
	WT16	2893	15371329		WT16	158.363	252	29.3653
	KO16	2887	64072814		KO16	660.109	256	122.404
	KO17	2887	59193785		KO17	609.843	18	113.083
	WT17	2887	18131139		WT17	186.796	252	34.6376
	WT18	2891	36894748		WT18	380.107	18	70.4835
	KO18	2897	70346359		KO18	724.742	256	134.389
	KO19	2885	56924920		KO19	586.468	18	108.749
	WT19	2890	10494973		WT19	108.124	252	20.0495
	WT20	2884	41836812		WT20	431.023	18	79.9247
	KO20	2884	63040405		KO20	649.473	256	120.432
	KO21	2883	62191503		KO21	640.727	18	118.81
	PLP Standart curve
	PLP 250nM	2888	28816565
	PLP 500nM	2891	50300303
	PLP 1000nM	2888	94388478
	PLP 2000nM	2887	194455102
PLP Exp7
	Injection Name	Ret.Time	Area
		min	counts*min
		Emission_1	Emission_1
		[2,73..2,87]	[2,73..2,87]			PLP nM	Age (days)	PLP nmol/g protein
	WT21	2776	31266847		WT21	580.23	39	107.592
	WT22	2779	20988928		WT22	389.499	176	72.2249
	KO22	2769	45868859		KO22	851.205	41	157.839
	KO23	2774	41675208		KO23	773.381	162	143.408
	WT23	2776	20791742		WT23	385.84	59	71.5464
	WT24	2772	21173010		WT24	392.915	252	72.8584
	KO24	2779	52477534		KO24	973.844	60	180.58
	KO25	2773	55705418		KO25	1033.75	256	191.688
	WT25	2772	21078090		WT25	391.154	269	72.5317
	KO26	2772	55835121		KO26	1036.15	142	192.134
	KO27	2781	43311714		KO27	803.751	327	149.04
	WT26	2782	31850209		WT26	591.056	39	109.6
	WT27	2772	21164193		WT27	392.751	176	72.828
	KO28	2777	48434468		KO28	898.815	41	166.668
	KO29	2777	45981919		KO29	853.303	162	158.228
	WT28	2776	20047462		WT28	372.028	59	68.9853
	WT29	2781	18074657		WT29	335.418	252	62.1966
	KO30	2782	41361103		KO30	767.553	60	142.328
	KO31	2769	53143595		KO31	986.204	256	182.872
	WT30	2776	24587727		WT30	456.283	136	84.6087
	WT31	2781	26416085		WT31	490.213	269	90.9003
	KO32	2773	54643845		KO32	1014.05	142	188.035
	KO33	2777	40451927		KO33	750.681	327	139.199
	WT32	2783	20094117		WT32	372.894	252	69.1458
	WT33	2812	23422903		WT33	434.667	269	80.6005
	KO34	2812	54955768		KO34	1019.83	256	189.108
	KO35	2808	45410782		KO35	842.704	366	156.263
	PLP Standard curve
	PLP 250nM	2817	31662462
	PLP 500nM	2816	57863263
	PLP 1000nM	2809	102688920
	PLP 2000nM	2802	216507106
