# Supplementary material for: 7,8-Dihydroxyflavone is a direct inhibitor of human and murine pyridoxal phosphatase
Source: eLife. 2024 Jun 10;13:RP93094. doi: 10.7554/eLife.93094 (PMC11164532; doi:10.7554/eLife.93094)
Supplement: Figure 2—figure supplement 1—source data 1. [file elife-93094-fig2-figsupp1-data1.xlsx]

## Sheet: to Fig 2 - Fig Suppl 1_a
IC50 data_PDXP_PDXP screen
Comp_ID	Response.lowestdose.predicted	Response.highestdose.predicted	Response.difference	HillCoefficient	IC50.relative	IC50.relative.lower	IC50.relative.higher	pIC50	FitIsValid	Activity.call	Problem	RSE	b	c	d	e	Dose	Response	p.value
101699	125	71.8	53.1	-0.991	39.6	-93.2	172	4.4	TRUE	active		5.11891	0.991401	29.2541	125.418	39.6457	50,50,25,25,12.5,12.5,6.25,6.25,3.125,3.125,1.5625,1.5625,0.78125,0.78125,0.390625,0.390625,0.1953125,0.1953125	65.7318376068375,77.6779543883899,87.3058144695961,90.6019922044175,100.261164794986,99.7291974396852,112.307474073005,117.997671711292,120.455205689289,112.737430167598,124.465474938661,147.67981438515,127.57275284819,112.728992677924,129.317125491598,121.028285490822,124.917257683215,127.638036809816	1.89e-10
101801	106	94.3	11.3	-3.43	2.02	0.708	3.33	5.69	FALSE	inactive	Response Difference lower than 25%	3.07284	3.42948	94.2552	105.6	2.01856	50,50,25,25,12.5,12.5,6.25,6.25,3.125,3.125,1.5625,1.5625,0.78125,0.78125,0.390625,0.390625,0.1953125,0.1953125	94.2040598290595,95.0932964754663,96.6267199289835,100.043308791685,91.7994254374511,91.8513047759726,93.09237952559,91.4551804423746,97.2441455200353,95.5307262569832,101.331931300386,104.582366589327,103.538251381053,100.346770501682,108.938148015731,109.54817589597,102.836879432624,106.349693251534	5.9e-06
101961	117	62.7	54.5	-0.928	118	-614	849	3.93	FALSE	inactive	IC50 larger than highest measured concentration	8.03268	0.928412	-59.0661	117.666	117.857	50,50,25,25,12.5,12.5,6.25,6.25,3.125,3.125,1.5625,1.5625,0.78125,0.78125,0.390625,0.390625,0.1953125,0.1953125	62.3130341880341,60.8154803040775,90.5015534842432,85.404937202252,97.4928179681379,90.9158050221564,105.60952004161,107.101280558789,108.825238254632,104.767225325885,118.436733263232,137.877030162413,115.876257030975,105.928980263243,121.308544869503,109.737671451267,118.156028368794,114.447852760736	9.35e-08
101967	100	-338	438	-2.38	121	-424	666	3.92	FALSE	inactive	IC50 larger than highest measured concentration	4.29479	2.38357	-3960.94	100.372	121.341	50,50,25,25,12.5,12.5,6.25,6.25,3.125,3.125,1.5625,1.5625,0.78125,0.78125,0.390625,0.390625,0.1953125,0.1953125	-340.037393162393,-112.370421561852,8.12250332889481,49.5452576873105,84.4868111778529,83.2840965041852,94.7841955913186,94.3888242142025,90.2976858096389,99.1806331471136,102.17315106905,96.9257540603252,101.767194529495,99.2986351609641,107.722559885592,104.373189030189,99.1489361702126,103.282208588957	6.01e-12
104803	116	115	1.55	-0.0569	0.628	-188	190	6.2	FALSE	inactive	Response Difference lower than 25%	8.4625	0.0569153	106.131	125.876	0.627728	50,50,25,25,12.5,12.5,6.25,6.25,3.125,3.125,1.5625,1.5625,0.78125,0.78125,0.390625,0.390625,0.1953125,0.1953125	102.430555555556,116.655148583275,125.654682645362,110.437418796016,117.811439018021,108.739537173806,119.174334385356,116.600698486612,113.096322807863,113.035381750466,118.927444794953,137.354988399072,115.482373054401,108.022923191918,120.378977475867,111.997803637673,115.555555555556,108.619631901841	0.994
104828	102	99.3	2.28	-0.334	0.697	-1.6	3	6.16	FALSE	inactive	Response Difference lower than 25%	4.00095	0.334454	98.2677	103.812	0.696756	50,50,25,25,12.5,12.5,6.25,6.25,3.125,3.125,1.5625,1.5625,0.78125,0.78125,0.390625,0.390625,0.1953125,0.1953125	96.6613247863249,99.0324809951629,103.81713271194,103.941100043309,95.3512666492558,97.2181191531267,104.157596383418,95.0407450523864,99.922113094988,102.383612662942,104.837013669821,94.953596287703,101.521609145396,101.220583024475,107.365033964963,102.207804621431,97.4940898345156,100.276073619632	0.851
104876	110	97.3	13	-1.24	41.5	-88.3	171	4.38	FALSE	inactive	Response Difference lower than 25%	4.96325	1.24454	87.0311	110.32	41.538	50,50,25,25,12.5,12.5,6.25,6.25,3.125,3.125,1.5625,1.5625,0.78125,0.78125,0.390625,0.390625,0.1953125,0.1953125	88.595085470085,102.833448514168,106.835330670218,106.366392377653,107.051449464612,98.1043820777941,109.324380861518,107.939464493597,106.304645688924,112.588454376164,111.566771819138,131.264501160092,109.190723285393,105.229749197572,117.590275294959,107.573263823722,111.300236406619,109.662576687116	0.00816
105412	99.6	92.7	6.96	-10.9	67.2	-888	1020	4.17	FALSE	inactive	IC50 larger than highest measured concentration	3.19332	10.871	-80.0092	99.6394	67.1838	50,50,25,25,12.5,12.5,6.25,6.25,3.125,3.125,1.5625,1.5625,0.78125,0.78125,0.390625,0.390625,0.1953125,0.1953125	91.8536324786324,93.5038009675191,100,102.815071459506,95.560198485244,96.2826193993111,100.121801659016,95.1338766006983,98.584044278496,104.692737430168,101.472134595163,97.5058004640369,99.6562533362632,97.8184430437695,105.791919914194,100.515042779529,97.4468085106386,100.828220858896	0.0368
105479	112	112	0.0549	-0.347	0.266			6.58	FALSE	inactive	Response Difference lower than 25%	7.78817	0.347038	112.193	112.051	0.265753	50,50,25,25,12.5,12.5,6.25,6.25,3.125,3.125,1.5625,1.5625,0.78125,0.78125,0.390625,0.390625,0.1953125,0.1953125	101.30876068376,111.679336558397,120.239680426098,113.728886964054,113.423870462261,101.846381093058,115.459353858659,110.221187427241,111.141411053002,115.046554934823,115.562565720295,131.61252900232,113.120891044988,103.487814214293,114.944583482302,108.325664437978,111.914893617021,105.613496932515	1
105938	99.4	95	4.39	-0.721	31.3	-263	325	4.5	FALSE	inactive	Response Difference lower than 25%	3.39374	0.721113	91.7337	99.5965	31.2628	50,50,25,25,12.5,12.5,6.25,6.25,3.125,3.125,1.5625,1.5625,0.78125,0.78125,0.390625,0.390625,0.1953125,0.1953125	91.1057692307691,95.0241879751208,98.3133599644917,102.468601126029,92.635152781405,95.6425406203844,100.525572662321,94.9476135040745,96.627531324413,101.340782122905,100.280406589555,95.2436194895589,96.8520617694613,100.960133354369,103.78977475867,99.8568317822281,96.8794326241137,98.5582822085892	0.27
106937	113	112	1.25	-0.0418	0.175	-34.3	34.7	6.76	FALSE	inconclusive	IC50 lower than lowest measured concentration	8.56408	0.0418002	102.543	124.252	0.174982	50,50,25,25,12.5,12.5,6.25,6.25,3.125,3.125,1.5625,1.5625,0.78125,0.78125,0.390625,0.390625,0.1953125,0.1953125	101.842948717949,114.581893572909,122.015090989791,107.752273711563,114.102898929224,107.360905957656,116.99411461566,108.358556461001,112.323477316726,109.906890130354,115.702769015072,136.368909512761,111.796041702876,104.53543227662,117.518770110833,107.667872061197,113.806146572104,106.779141104295	0.997
203639	102	85.1	16.5	-1.16	4.78	-1.2	10.8	5.32	FALSE	inactive	Response Difference lower than 25%	2.72787	1.15897	83.9865	102.009	4.78135	50,50,25,25,12.5,12.5,6.25,6.25,3.125,3.125,1.5625,1.5625,0.78125,0.78125,0.390625,0.390625,0.1953125,0.1953125	57.0245726495726,55.4941257774707,83.7549933422104,90.1689042875703,87.6207887176809,86.4352535696704,93.6613458993541,90.6635622817229,96.4236452901486,96.5735567970204,98.5979670522262,94.4895591647328,99.9001626183337,98.081091147039,102.93171254916,105.219918801573,97.6359338061467,102.546012269939	1.44e-06
203640	116	51.7	64.7	-0.958	84.9	-310	480	4.07	FALSE	inactive	IC50 larger than highest measured concentration	8.43399	0.958229	-56.5138	116.894	84.9054	50,50,25,25,12.5,12.5,6.25,6.25,3.125,3.125,1.5625,1.5625,0.78125,0.78125,0.390625,0.390625,0.1953125,0.1953125	50.7745726495725,50.1036627505183,83.4886817576565,75.7903854482459,95.507965526247,85.8444116198919,103.997668111727,99.8835855646101,107.848430481649,102.607076350093,114.230634419909,138.399071925754,114.006747403772,105.84181885428,121.094029317126,108.987084859263,117.494089834515,113.466257668712	1.29e-08
203646	103	84.5	18.4	-3.03	1.61	0.886	2.34	5.79	FALSE	inactive	Response Difference lower than 25%	3.68296	3.03074	84.4517	102.911	1.61369	50,50,25,25,12.5,12.5,6.25,6.25,3.125,3.125,1.5625,1.5625,0.78125,0.78125,0.390625,0.390625,0.1953125,0.1953125	84.8557692307689,84.1050449205253,86.3293386595651,89.9956691208316,82.763123530948,81.1669128508126,87.3604592910126,79.7671711292202,89.1134846136189,83.6871508379888,97.7567472835615,91.7053364269142,99.2114304328388,100.085674233587,109.295673936361,100.42113224292,98.5815602836878,104.877300613497	1.2e-07
203647	121	27.2	93.6	-1.35	15.6	3.56	27.7	4.81	TRUE	active		7.96168	1.3485	7.65676	121.11	15.6325	50,50,25,25,12.5,12.5,6.25,6.25,3.125,3.125,1.5625,1.5625,0.78125,0.78125,0.390625,0.390625,0.1953125,0.1953125	25.934829059829,26.2612301313062,48.9569462938305,51.1909917713296,75.3982763123527,63.7370753323487,98.1815940036475,98.0675203725262,106.869411528787,99.7020484171322,118.787241500175,138.805104408353,116.268683527525,110.030092670424,121.952091526636,113.786290038436,123.120567375887,120.398773006135	3.12e-12
203717	111	88.9	22.1	-0.542	21.6	-49.2	92.4	4.67	FALSE	inactive	Response Difference lower than 25%	4.93555	0.542371	72.9916	113.857	21.5979	50,50,25,25,12.5,12.5,6.25,6.25,3.125,3.125,1.5625,1.5625,0.78125,0.78125,0.390625,0.390625,0.1953125,0.1953125	81.3835470085466,83.8286109191432,97.6919662671993,104.980511043742,98.2240793940977,96.9226981782377,97.2952849290947,98.6728754365542,101.20825730814,100.297951582868,105.678233438486,107.250580046404,107.420978165856,107.936020422151,111.583839828388,110.680265321685,105.390070921986,115.184049079755	2.15e-05
203793	117	19.4	97.3	-0.92	12.1	5.96	18.2	4.92	TRUE	active		3.25829	0.919892	-7.69067	119.519	12.0784	50,50,25,25,12.5,12.5,6.25,6.25,3.125,3.125,1.5625,1.5625,0.78125,0.78125,0.390625,0.390625,0.1953125,0.1953125	16.8002136752136,21.5618521078093,37.0616955170883,35.5132091814639,52.781405066597,54.5297882816347,72.4246430792417,77.2526193247964,91.0179967167789,93.1471135940409,102.944269190326,124.767981438515,114.447780859134,101.913348110253,117.876296031463,112.187020112623,117.068557919622,117.085889570552	0
203830	103	87.2	15.5	-2.03	1.74	0.726	2.76	5.76	FALSE	inactive	Response Difference lower than 25%	2.93799	2.03312	87.2255	102.931	1.74122	50,50,25,25,12.5,12.5,6.25,6.25,3.125,3.125,1.5625,1.5625,0.78125,0.78125,0.390625,0.390625,0.1953125,0.1953125	85.2831196581196,84.0359364201798,90.0577008433201,93.0272845387614,86.8895272917211,84.6134908911867,90.6735841230491,85.5878928987194,93.4863596888179,89.1247672253259,96.9155275148968,95.0696055684453,99.7044230510668,98.6026370852398,105.720414730068,104.468634508703,99.2907801418444,102.484662576688	1.23e-07
203862	109	32	77	-0.795	27.5	-60.8	116	4.56	TRUE	active		7.41005	0.795378	-17.3543	111.463	27.5155	50,50,25,25,12.5,12.5,6.25,6.25,3.125,3.125,1.5625,1.5625,0.78125,0.78125,0.390625,0.390625,0.1953125,0.1953125	33.1463675213675,29.163787145819,54.7270306258323,49.6318752706799,66.4664403238443,60.7336287543083,86.0718156946376,82.5145518044237,94.6710946179118,77.6536312849162,94.0413599719594,116.125290023202,105.060662140462,100.434707828233,116.660707901323,103.052859910736,109.172576832151,103.588957055215	5.54e-11
204383	98.3	51.8	46.5	-0.807	384	-1380	2140	3.42	FALSE	inactive	IC50 larger than highest measured concentration	3.40847	0.807203	-192.322	98.942	383.532	50,50,25,25,12.5,12.5,6.25,6.25,3.125,3.125,1.5625,1.5625,0.78125,0.78125,0.390625,0.390625,0.1953125,0.1953125	50.9882478632478,50.7947477539738,72.3923657345761,74.3178865309658,79.3679811961346,77.4249138355489,92.4496737690701,84.6565774155992,94.2095680040745,93.5195530726257,99.5092884682795,91.2993039443153,96.6569051942036,95.8138599572211,103.146228101537,99.8582271839606,95.035460992908,96.5950920245396	1.29e-12
204384	109	53	56.1	-3.23	49.9	-47.7	147	4.3	TRUE	active		8.18544	3.22507	-2.66531	109.071	49.8981	50,50,25,25,12.5,12.5,6.25,6.25,3.125,3.125,1.5625,1.5625,0.78125,0.78125,0.390625,0.390625,0.1953125,0.1953125	61.8856837606836,43.5383552176918,105.858854860186,94.0666955391944,106.215722120658,95.9379615952733,112.149700523538,104.633294528521,106.353444141403,106.852886405959,114.72134595163,127.552204176334,109.291362281073,102.878589588738,116.589202717197,104.560172862367,108.888888888889,104.509202453988	1.41e-07
204455	99.3	93.7	5.65	-0.691	66.4	-715	848	4.18	FALSE	inactive	IC50 larger than highest measured concentration	3.76706	0.691493	86.5429	99.5648	66.4105	50,50,25,25,12.5,12.5,6.25,6.25,3.125,3.125,1.5625,1.5625,0.78125,0.78125,0.390625,0.390625,0.1953125,0.1953125	90.7318376068372,93.5038009675191,98.3133599644917,100.303161541793,92.8440846173933,94.313146233383,101.896574530345,92.3864959254948,96.2164806098587,101.564245810056,100.771118121276,93.2714617169374,100.293390728897,99.9982541854288,103.575259206293,100.231357607277,94.9881796690309,98.9877300613495	0.177
204914	109	93.4	15.5	-8.03	2.71	1.24	4.18	5.57	FALSE	inactive	Response Difference lower than 25%	7.97018	8.03236	93.4269	108.916	2.70968	50,50,25,25,12.5,12.5,6.25,6.25,3.125,3.125,1.5625,1.5625,0.78125,0.78125,0.390625,0.390625,0.1953125,0.1953125	86.4583333333336,90.0483759502419,114.647137150466,95.1927241229969,87.4640898406897,84.8104382077793,94.7887444493458,94.4353899883585,94.1566521821677,99.4785847299813,106.449351559762,121.925754060324,105.752819404015,103.92465581589,113.013943510904,106.348798803303,108.22695035461,105.613496932515	0.00387
205084	97.8	14.7	83.1	-1.44	102	-443	647	3.99	FALSE	inactive	IC50 larger than highest measured concentration	4.57192	1.43983	-217.888	97.8695	102.122	50,50,25,25,12.5,12.5,6.25,6.25,3.125,3.125,1.5625,1.5625,0.78125,0.78125,0.390625,0.390625,0.1953125,0.1953125	7.18482905982905,22.1147201105736,88.3710608078118,89.2161108705067,84.6435100548448,82.4470704086659,95.3573517027394,89.5925494761348,93.6451071545396,96.7970204841713,98.1072555205047,91.5893271461719,96.5108656957663,97.1198585760878,102.717196996782,104.279418033753,94.373522458629,96.1656441717793	2.75e-13
205085	107	84.5	22.1	-2.68	70.7	-251	393	4.15	FALSE	inactive	IC50 larger than highest measured concentration	6.63068	2.67582	28.6757	106.617	70.7151	50,50,25,25,12.5,12.5,6.25,6.25,3.125,3.125,1.5625,1.5625,0.78125,0.78125,0.390625,0.390625,0.1953125,0.1953125	77.4839743589742,91.0850034554251,102.840656901909,105.933304460806,102.768346826847,96.134908911866,106.498462665547,100.861466821886,103.370105000545,106.778398510242,112.127584998248,122.563805104408,105.751070427985,102.007234138305,111.798355380765,105.973854357735,108.368794326241,101.748466257669	0.00136
205653	97.2	88.4	8.75	-5.36	1.48	0.234	2.72	5.83	FALSE	inactive	Response Difference lower than 25%	3.41922	5.36061	88.4399	97.1916	1.47655	50,50,25,25,12.5,12.5,6.25,6.25,3.125,3.125,1.5625,1.5625,0.78125,0.78125,0.390625,0.390625,0.1953125,0.1953125	86.5117521367523,90.7394609536974,92.3657345761208,93.6336076223473,85.0091407678243,86.4844903988185,91.886453321235,83.3993015133873,86.5957894560266,87.8584729981378,96.2145110410095,88.5150812064967,96.4128501641306,95.5523757303325,100.572041473007,99.1979230840611,94.7990543735229,95.8588957055219	0.000456
206501	107	84.1	23.4	-14.3	2.88	1.17	4.58	5.54	FALSE	inactive	Response Difference lower than 25%	5.6063	14.3113	84.0644	107.474	2.8782	50,50,25,25,12.5,12.5,6.25,6.25,3.125,3.125,1.5625,1.5625,0.78125,0.78125,0.390625,0.390625,0.1953125,0.1953125	75.0801282051283,77.6779543883899,89.8801597869507,91.2083152880034,85.7926351527812,83.4318069916297,88.3308025322775,81.1175785797439,90.2467524248637,88.901303538175,105.397826848931,117.633410672854,105.306976264573,99.7354767625615,112.298891669646,105.410809758602,108.085106382979,105.920245398773	3.81e-07
206528	92.7	47.8	44.8	-2.27	0.758	0.367	1.15	6.12	TRUE	active		7.16534	2.27496	47.8326	94.7156	0.757996	50,50,25,25,12.5,12.5,6.25,6.25,3.125,3.125,1.5625,1.5625,0.78125,0.78125,0.390625,0.390625,0.1953125,0.1953125	58.7339743589743,65.7912923289565,43.1868619618286,43.4820268514508,37.3204492034473,42.959133431807,42.3903291278343,47.4039580908032,47.5287396198447,52.3277467411545,54.1535226077814,59.860788863109,66.9181184078637,71.5629437278702,84.4118698605648,89.8805466346747,91.3475177304965,93.1595092024538	3.18e-08
206533	106	40.6	65.5	-0.523	254	-851	1360	3.6	FALSE	inactive	IC50 larger than highest measured concentration	6.99414	0.523492	-125.41	111.576	253.903	50,50,25,25,12.5,12.5,6.25,6.25,3.125,3.125,1.5625,1.5625,0.78125,0.78125,0.390625,0.390625,0.1953125,0.1953125	36.2980769230769,40.3593642017969,61.6511318242344,59.246427024686,72.00313397754,71.5657311669127,84.5357381629437,86.6123399301509,80.0040334970878,83.2402234636872,89.8352611286366,112.761020881671,95.180477929562,91.6262327390666,106.792992491956,105.127403666697,111.347517730496,106.840490797546	5.35e-10
207230	102	17.2	85	-0.91	10.8	3.8	17.9	4.97	TRUE	active		3.95502	0.909844	-4.59838	104.999	10.8436	50,50,25,25,12.5,12.5,6.25,6.25,3.125,3.125,1.5625,1.5625,0.78125,0.78125,0.390625,0.390625,0.1953125,0.1953125	16.4797008547008,15.4803040774015,28.0071016422548,37.6786487656994,44.998694176025,47.2919743968489,62.8188914073868,60.5820721769498,75.8357306843908,83.314711359404,87.7322117069752,87.9930394431554,91.9372933794336,102.352517464612,102.431176260279,102.115568566901,95.981087470449,103.159509202454	1.11e-16
207278	115	58.1	56.6	-0.975	102	-195	399	3.99	FALSE	inactive	IC50 larger than highest measured concentration	7.48555	0.974917	-56.4572	115.086	102.212	50,50,25,25,12.5,12.5,6.25,6.25,3.125,3.125,1.5625,1.5625,0.78125,0.78125,0.390625,0.390625,0.1953125,0.1953125	53.2852564102563,45.9571527297858,90.4127829560586,83.8458207016024,93.5753460433531,89.7341211226,106.983514579389,100.908032596042,103.060311074885,101.862197392924,113.389414651244,131.322505800464,111.353259271486,106.80434462121,117.661780479084,111.995431454727,115.697399527187,115.858895705522	4.31e-07
207300	105	89.8	15.1	-2.58	1.65	0.47	2.83	5.78	FALSE	inactive	Response Difference lower than 25%	4.19705	2.58368	89.8191	105.01	1.65022	50,50,25,25,12.5,12.5,6.25,6.25,3.125,3.125,1.5625,1.5625,0.78125,0.78125,0.390625,0.390625,0.1953125,0.1953125	81.4903846153848,96.1990324809957,93.519751442521,96.23213512343,86.2104988247585,85.9428852781882,92.2058310374569,87.4970896391152,94.1555084684373,90.5400372439478,98.7381703470035,98.0858468677494,101.720336546713,101.917615656982,105.648909545942,107.762480298672,100.851063829787,106.779141104295	1.61e-05
207309	111	70	41.4	-4.26	2.44	1.59	3.3	5.61	TRUE	active		6.89248	4.25804	69.9775	111.414	2.44189	50,50,25,25,12.5,12.5,6.25,6.25,3.125,3.125,1.5625,1.5625,0.78125,0.78125,0.390625,0.390625,0.1953125,0.1953125	62.7938034188033,67.5881133379407,73.9902352418996,67.9948029449979,79.62914599112,77.6218611521416,61.5242624715024,69.2433061699651,80.7248781373018,81.8994413407821,96.7753242201196,115.661252900232,107.762247113552,101.218901869703,115.516624955309,110.584401222651,115.319148936171,116.840490797546	2.61e-09
207543	102	83.9	17.6	-0.69	244	-1160	1640	3.61	FALSE	inactive	IC50 larger than highest measured concentration	4.84663	0.69023	29.7962	102.058	243.611	50,50,25,25,12.5,12.5,6.25,6.25,3.125,3.125,1.5625,1.5625,0.78125,0.78125,0.390625,0.390625,0.1953125,0.1953125	81.436965811966,81.2024879060125,96.9818020417221,94.9328713728887,91.538260642465,90.0787789266371,103.271646429236,91.7345750873109,95.8552958139317,96.0521415270018,102.73396424816,94.0255220417635,102.160058270052,96.1587553247345,105.720414730068,106.916448228154,98.2505910165486,103.159509202454	0.000359
207883	104	48.6	55.1	-0.754	195	-578	967	3.71	FALSE	inactive	IC50 larger than highest measured concentration	4.92664	0.753527	-107.985	104.849	194.513	50,50,25,25,12.5,12.5,6.25,6.25,3.125,3.125,1.5625,1.5625,0.78125,0.78125,0.390625,0.390625,0.1953125,0.1953125	47.409188034188,47.2011057360056,72.7474478473147,68.6011260285838,81.9796291459912,77.9172821270312,91.481724663609,87.077997671711,90.8112132743986,92.1787709497207,99.0886785839467,112.296983758701,99.4105222041615,97.205726789072,108.366106542725,100.326105384925,106.477541371159,100.030674846626	3.13e-11
207939	90	3.39	86.7	-1	1.86	1.43	2.29	5.73	TRUE	active		2.88366	1.00062	-0.173265	99.5106	1.85963	50,50,25,25,12.5,12.5,6.25,6.25,3.125,3.125,1.5625,1.5625,0.78125,0.78125,0.390625,0.390625,0.1953125,0.1953125	0.186965811965812,1.72771250863857,6.25832223701731,10.0476396708532,13.3977539827631,15.3865091088134,22.6099791171505,24.5401629802095,33.8901058850171,35.4189944134078,54.1535226077814,54.6983758700696,66.8699486930595,69.9939090469405,85.9134787272077,87.6205539884419,86.6193853427899,88.1288343558281	0
208268	106	28.5	77.2	-1.14	20	-2.1	42.2	4.7	TRUE	active		5.97657	1.14182	1.11303	106.199	20.0252	50,50,25,25,12.5,12.5,6.25,6.25,3.125,3.125,1.5625,1.5625,0.78125,0.78125,0.390625,0.390625,0.1953125,0.1953125	28.659188034188,25.7774706288873,52.8628495339547,47.9861411866608,68.6079916427265,60.2904972919745,87.927031528973,82.5145518044237,92.3053608912424,88.5288640595903,105.46792849632,112.935034802784,105.701807603164,98.4284435869119,113.514479799785,100.236381053514,103.404255319149,99.4171779141106	9.53e-13
208303	95.4	45.6	49.8	-0.925	13.3	-2.22	28.8	4.88	TRUE	active		3.62898	0.924859	30.6624	96.7419	13.2758	50,50,25,25,12.5,12.5,6.25,6.25,3.125,3.125,1.5625,1.5625,0.78125,0.78125,0.390625,0.390625,0.1953125,0.1953125	45.0587606837606,43.814789219074,56.1473590767866,58.4668687743612,64.2204230869678,60.7336287543083,76.7875964612279,72.0372526193245,85.049488493096,82.5698324022346,92.8496319663513,83.5266821345704,95.7721419454373,88.6597704835777,100.786557025385,94.4926284414968,91.9148936170214,93.2208588957053	2.95e-13
208348	104	40.3	63.6	-1.41	4.42	1.52	7.31	5.35	TRUE	active		9.17243	1.40727	38.1337	104.649	4.41616	50,50,25,25,12.5,12.5,6.25,6.25,3.125,3.125,1.5625,1.5625,0.78125,0.78125,0.390625,0.390625,0.1953125,0.1953125	48.3707264957264,22.667588113338,62.71637816245,39.8440883499351,51.3188822146774,42.220580994584,67.4185051135749,63.5157159487775,74.2909546730996,75.9404096834264,88.7837364178059,107.424593967517,95.3289222700398,95.5517291323431,105.577404361816,102.776988988187,105.200945626478,100.828220858896	4.39e-09
209188	92.2	67.3	24.9	-1.12	1.06	0.106	2.01	5.97	FALSE	inactive	Response Difference lower than 25%	3.28011	1.11537	66.8825	96.0409	1.05962	50,50,25,25,12.5,12.5,6.25,6.25,3.125,3.125,1.5625,1.5625,0.78125,0.78125,0.390625,0.390625,0.1953125,0.1953125	64.6634615384614,64.4091223220456,69.6404793608522,70.7665656128194,68.8691564377121,66.5435745937962,73.8802776479291,70.2211874272406,75.8868165643296,74.7486033519553,77.8478794251666,72.0997679814385,83.1913201234634,83.4260770382709,95.7811941365749,89.880128014155,89.5035460992907,90.521472392638	3.05e-09
209295	103	42.7	60.7	-0.983	8.6	1.69	15.5	5.07	TRUE	active		4.35354	0.982665	31.6083	105.13	8.59868	50,50,25,25,12.5,12.5,6.25,6.25,3.125,3.125,1.5625,1.5625,0.78125,0.78125,0.390625,0.390625,0.1953125,0.1953125	39.236111111111,41.6033172080166,52.6853084775855,55.4352533564313,63.4891616610081,62.0630231413098,73.4763869378345,69.336437718277,80.1591210788728,83.0167597765363,95.8640028040662,102.958236658933,98.6736931778641,98.4301247416841,107.22202359671,99.2002952670066,103.640661938534,97.2699386503066	1.52e-13
209612	94.7	72	22.7	-2.02	4.17	2.46	5.87	5.38	FALSE	inactive	Response Difference lower than 25%	3.0262	2.02362	71.8712	94.7475	4.1658	50,50,25,25,12.5,12.5,6.25,6.25,3.125,3.125,1.5625,1.5625,0.78125,0.78125,0.390625,0.390625,0.1953125,0.1953125	70.3258547008546,69.5922598479614,74.6116289391922,75.7903854482459,74.5103160094017,72.0088626292467,83.4881840420076,75.0640279394643,88.4967941704148,83.314711359404,95.0227830354014,90.3132250580045,93.8570860674747,93.197724492356,98.7844118698608,96.2819520832999,91.8203309692673,91.993865030675	3.96e-10
209701	108	38.6	69.7	-0.921	40.4	-52.7	133	4.39	TRUE	active		4.77458	0.921348	-19.4207	109.238	40.3682	50,50,25,25,12.5,12.5,6.25,6.25,3.125,3.125,1.5625,1.5625,0.78125,0.78125,0.390625,0.390625,0.1953125,0.1953125	38.7553418803418,37.5950241879752,62.8939192188194,57.1676050238198,78.4277879341866,73.7813884785823,92.3685125653226,86.2863795110593,96.0624604942216,93.2216014897579,105.397826848931,115.139211136891,104.374772041015,99.9110927764659,113.085448695031,106.825468035184,108.321513002364,103.773006134969	2.11e-13
209755	99.8	31.2	68.6	-0.706	67.1	-126	261	4.17	FALSE	inactive	IC50 larger than highest measured concentration	3.13203	0.706237	-56.3053	102.301	67.0915	50,50,25,25,12.5,12.5,6.25,6.25,3.125,3.125,1.5625,1.5625,0.78125,0.78125,0.390625,0.390625,0.1953125,0.1953125	29.7809829059828,30.9606081548031,50.4660452729694,53.6162841056735,61.1386785061373,65.6080748399804,78.8066908913308,74.1327124563447,86.4397869032579,87.1135940409683,95.6536978619003,88.4570765661255,94.5462554969769,95.0282434001743,101.644619234895,102.773919104375,94.6099290780141,99.0490797546009	2.22e-16
209862	106	15.4	90.4	-0.896	9.69	4.92	14.5	5.01	TRUE	active		3.2666	0.896442	-6.09013	109.213	9.68694	50,50,25,25,12.5,12.5,6.25,6.25,3.125,3.125,1.5625,1.5625,0.78125,0.78125,0.390625,0.390625,0.1953125,0.1953125	15.0373931623932,14.1672425708362,28.450954283178,32.2217410134258,44.8942282580308,42.959133431807,63.0598611760354,62.0721769499417,78.8207472720522,76.2383612662942,95.723799509289,108.062645011601,97.446422123381,95.6394078196974,108.723632463354,98.3527282545826,108.983451536643,102.300613496932	0
209896	99	94.4	4.64	-1.54	2.99	-5.08	11.1	5.52	FALSE	inactive	Response Difference lower than 25%	2.96402	1.54323	94.2949	99.0623	2.98522	50,50,25,25,12.5,12.5,6.25,6.25,3.125,3.125,1.5625,1.5625,0.78125,0.78125,0.390625,0.390625,0.1953125,0.1953125	92.1207264957261,92.0525224602627,96.8042609853529,98.7440450411434,93.3141812483677,94.2639094042348,98.2656281703595,91.8277066356228,97.247119175733,97.9143389199255,99.7896950578341,92.5174013921114,97.3950459525235,102.008785973479,102.431176260279,97.9751325457221,97.5886524822697,97.3312883435581	0.066
210443	112	90.6	20.9	-2.55	3.61	0.457	6.76	5.44	FALSE	inactive	Response Difference lower than 25%	6.38054	2.54684	90.6195	111.604	3.60726	50,50,25,25,12.5,12.5,6.25,6.25,3.125,3.125,1.5625,1.5625,0.78125,0.78125,0.390625,0.390625,0.1953125,0.1953125	79.7809829059826,93.2273669661369,93.8748335552597,98.5708098744045,90.0757377905455,87.4692269817823,99.9604369058429,94.9476135040745,100.796444117766,98.659217877095,107.570977917981,123.085846867749,106.685096501575,102.355233176167,114.015016088667,113.412601454427,113.900709219858,110.337423312883	3.98e-05
210705	106	103	3.68	-2.16	1.22	-0.462	2.91	5.91	FALSE	inactive	Response Difference lower than 25%	2.49768	2.16224	102.637	106.391	1.22171	50,50,25,25,12.5,12.5,6.25,6.25,3.125,3.125,1.5625,1.5625,0.78125,0.78125,0.390625,0.390625,0.1953125,0.1953125	100.080128205128,106.496199032482,103.462050599201,106.886097877869,97.8062157221204,102.387986213688,103.673023296737,101.792782305006,102.238133398194,102.756052141527,102.944269190326,103.886310904872,105.701078863151,106.365951184438,108.008580622095,107.293067155802,102.647754137116,106.656441717792	0.085
211205	117	90.3	27	-1.38	73.7	-206	353	4.13	FALSE	inactive	IC50 larger than highest measured concentration	6.39111	1.37688	44.0653	117.337	73.7266	50,50,25,25,12.5,12.5,6.25,6.25,3.125,3.125,1.5625,1.5625,0.78125,0.78125,0.390625,0.390625,0.1953125,0.1953125	90.5715811965809,88.52798894264,111.628939192188,101.602425292334,111.752415774353,104.80059084195,115.539677114875,116.321303841676,112.171134647892,111.024208566108,120.399579390116,133.526682134571,116.66030841006,109.153047157685,122.452627815516,112.188973675049,118.156028368794,115	7.13e-05
212483	99.3	35	64.3	-0.766	105	-284	494	3.98	FALSE	inactive	IC50 larger than highest measured concentration	2.9059	0.766111	-80.9722	100.711	104.953	50,50,25,25,12.5,12.5,6.25,6.25,3.125,3.125,1.5625,1.5625,0.78125,0.78125,0.390625,0.390625,0.1953125,0.1953125	35.0694444444444,33.8631651693159,55.4371948513094,59.4196621914248,67.9811961347609,68.9069423929097,84.3748522369309,78.789289871944,90.3497629081438,92.3277467411545,94.9526813880128,91.2993039443153,97.0504248007716,93.1081060110336,101.716124419021,102.215618871134,96.7848699763597,96.7177914110433	2.22e-16
212517	94.9	96.1	1.22	0.035	22.9	-3550	3590	4.64	FALSE	inactive	Response Difference lower than 25%	5.66796	-0.0350413	83.3567	108.439	22.9188	50,50,25,25,12.5,12.5,6.25,6.25,3.125,3.125,1.5625,1.5625,0.78125,0.78125,0.390625,0.390625,0.1953125,0.1953125	93.6164529914525,97.5812024879061,104.97114957834,97.3581637072326,98.3285453120918,87.6169374692274,96.4038284625639,88.800931315483,93.6945918352565,90.5400372439478,96.5650192779527,104.988399071926,94.4434302812609,89.0099679546037,101.644619234895,93.6424101657807,98.4397163120567,90.6441717791409	0.991
212959	98	54.5	43.5	-1.07	12.8	2.8	22.8	4.89	TRUE	active		2.88544	1.0651	44.1249	98.6293	12.7961	50,50,25,25,12.5,12.5,6.25,6.25,3.125,3.125,1.5625,1.5625,0.78125,0.78125,0.390625,0.390625,0.1953125,0.1953125	52.5908119658119,54.8030407740152,62.8051486906347,64.7033347769597,70.2272133716374,71.3687838503201,84.0539183324366,77.8579743888244,88.6515005142902,87.8584729981378,98.5979670522262,90.7772621809747,93.7581960478245,96.4238605003634,102.645691812657,98.161139596687,94.9881796690309,95.6134969325152	4.57e-14
212962	103	76.1	26.8	-6.07	3.2	1.7	4.7	5.49	TRUE	active		6.17088	6.0667	76.0514	102.832	3.19926	50,50,25,25,12.5,12.5,6.25,6.25,3.125,3.125,1.5625,1.5625,0.78125,0.78125,0.390625,0.390625,0.1953125,0.1953125	62.7938034188033,74.5680718728404,85.1753217931647,79.8614118666089,77.4353617132407,72.107336287543,83.9679688570815,73.7136204889406,90.8130432163666,89.3482309124767,104.346302138101,106.960556844547,102.556274214664,94.3314694068627,110.940293171255,102.681962130192,100.567375886525,99.9079754601224	3.01e-07
213071	96.8	80	16.8	-2.4	5.9	-2.02	13.8	5.23	FALSE	inactive	Response Difference lower than 25%	8.46977	2.39569	79.9329	96.8211	5.89818	50,50,25,25,12.5,12.5,6.25,6.25,3.125,3.125,1.5625,1.5625,0.78125,0.78125,0.390625,0.390625,0.1953125,0.1953125	95.0053418803415,60.4008293020041,87.6608965823347,79.8614118666089,84.9569078088273,77.3264401772527,94.5487323350186,81.4435389988356,94.9827947331219,92.9236499068901,102.523659305994,88.5730858468678,98.0854542400464,96.2509601980142,105.362888809439,97.6006067206734,90.7801418439716,93.4049079754605	0.00975
213333	102	89.7	12.6	-10.4	2.19	-1.21	5.59	5.66	FALSE	inactive	Response Difference lower than 25%	7.92063	10.4099	89.7224	102.326	2.19013	50,50,25,25,12.5,12.5,6.25,6.25,3.125,3.125,1.5625,1.5625,0.78125,0.78125,0.390625,0.390625,0.1953125,0.1953125	92.5480769230768,88.2515549412578,112.782956058589,90.4287570376786,86.2627317837556,81.0192023633682,88.815375618959,79.2083818393482,90.3493816702334,88.0819366852886,99.0185769365581,105.916473317865,100.935775049618,96.4247657375485,110.439756882374,100.703003392919,103.54609929078,100.950920245399	0.0152
213836	95.8	91.7	4.18	-2.86	2.06	-4.62	8.75	5.69	FALSE	inactive	Response Difference lower than 25%	4.55692	2.86336	91.6554	95.8367	2.06009	50,50,25,25,12.5,12.5,6.25,6.25,3.125,3.125,1.5625,1.5625,0.78125,0.78125,0.390625,0.390625,0.1953125,0.1953125	94.097222222222,91.7760884588805,95.2951620062139,94.0666955391944,90.4936014625228,84.8104382077793,97.1345187098721,84.5168800931313,95.6507235514291,92.0297951582867,97.7567472835615,89.0951276102092,97.9378115135821,94.7676644104708,102.574186628531,96.8479270260711,91.6784869976363,91.871165644172	0.339
214027	99.6	89.7	9.92	-10.8	2.55	-0.259	5.36	5.59	FALSE	inactive	Response Difference lower than 25%	5.0398	10.8437	89.6556	99.5753	2.55147	50,50,25,25,12.5,12.5,6.25,6.25,3.125,3.125,1.5625,1.5625,0.78125,0.78125,0.390625,0.390625,0.1953125,0.1953125	84.3750000000001,87.3531444367658,96.537949400799,97.0983109571242,91.538260642465,84.0226489414082,92.1262260219818,84.2840512223516,92.2041041023485,88.975791433892,98.0371538731161,103.016241299304,102.802078220767,94.3308228088735,107.150518412585,96.1884601672109,100.189125295508,94.8159509202452	0.00284
214151	95.4	88.7	6.65	-2.8	1.31	-0.949	3.58	5.88	FALSE	inactive	Response Difference lower than 25%	4.38845	2.8007	88.749	95.427	1.31453	50,50,25,25,12.5,12.5,6.25,6.25,3.125,3.125,1.5625,1.5625,0.78125,0.78125,0.390625,0.390625,0.1953125,0.1953125	91.4262820512816,89.3572909467865,92.0106524633822,94.3265482893027,85.4270044398016,82.5455440669623,91.4813655432384,81.1641443538999,91.9962531938204,89.3482309124767,95.8640028040662,86.8329466357311,92.4332009577103,93.4583034820595,100.643546657133,97.693400935896,92.7186761229314,92.1779141104294	0.0575
214216	108	93.2	15.2	-2.65	5	-0.741	10.7	5.3	FALSE	inactive	Response Difference lower than 25%	5.82512	2.65171	93.2104	108.45	5.00317	50,50,25,25,12.5,12.5,6.25,6.25,3.125,3.125,1.5625,1.5625,0.78125,0.78125,0.390625,0.390625,0.1953125,0.1953125	86.6720085470086,92.3980649619904,98.1358189081225,95.6258120398441,99.5821363280231,89.9310684391926,105.692955674371,92.4796274738067,104.14134929246,100.893854748603,112.197686645636,117.053364269141,107.323909996236,105.495888929984,115.945656060065,106.071113858502,105.768321513003,100.214723926381	0.000605
214224	96.9	89.4	7.47	-2.78	3.04	-0.306	6.38	5.52	FALSE	inactive	Response Difference lower than 25%	2.61461	2.77734	89.4361	96.9154	3.03636	50,50,25,25,12.5,12.5,6.25,6.25,3.125,3.125,1.5625,1.5625,0.78125,0.78125,0.390625,0.390625,0.1953125,0.1953125	89.3963675213677,88.8735314443678,92.54327563249,91.6414032048506,88.2998171846436,86.8291482028556,93.3381375658462,85.6810244470313,93.0258242935467,95.0837988826815,96.8454258675082,92.5174013921114,95.6775514918584,97.2118048101718,100.500536288881,98.7300448830967,95.839243498818,94.5092024539878	0.000177
214306	106	94.4	11.9	-3	3.82	-1.74	9.38	5.42	FALSE	inactive	Response Difference lower than 25%	5.24161	3.00447	94.4134	106.346	3.81867	50,50,25,25,12.5,12.5,6.25,6.25,3.125,3.125,1.5625,1.5625,0.78125,0.78125,0.390625,0.390625,0.1953125,0.1953125	89.7702991452989,93.1582584657914,102.48557478917,94.1533131225638,95.8213632802294,89.3402264894141,102.706630379548,94.9010477299186,102.188496222313,96.8715083798882,110.024535576586,112.877030162413,104.277703871395,98.7798049343186,113.44297461566,104.656734662267,105.390070921986,102.852760736196	0.0018
214334	97.9	67.3	30.6	-0.674	39.8	-219	299	4.4	TRUE	active		3.68385	0.674284	39.639	99.4954	39.7542	50,50,25,25,12.5,12.5,6.25,6.25,3.125,3.125,1.5625,1.5625,0.78125,0.78125,0.390625,0.390625,0.1953125,0.1953125	66.2660256410255,65.7912923289565,76.9196626719929,78.0424426158509,80.1514755810914,78.0649926144756,87.3639307879281,81.3504074505237,89.577984883154,92.7001862197393,95.3031896249562,88.2830626450112,94.6921492474122,102.182720832611,100.429031104755,99.7647352678718,92.8605200945624,95.1840490797549	2.53e-09
214373	110	94.5	15.7	-5.09	59.2	-269	387	4.23	FALSE	inactive	IC50 larger than highest measured concentration	7.20376	5.09077	57.4997	110.213	59.1581	50,50,25,25,12.5,12.5,6.25,6.25,3.125,3.125,1.5625,1.5625,0.78125,0.78125,0.390625,0.390625,0.1953125,0.1953125	92.1741452991449,96.7519004837595,121.393697292498,99.5236032914681,114.938626273179,102.33874938454,114.330877947555,108.684516880093,108.517198023358,102.979515828678,115.492464072905,122.389791183295,109.236269536153,104.970722043043,118.019306399714,104.092992362269,107.990543735225,107.269938650307	0.0376
214403	104	98.8	5.28	-1.98	1.48	-1.6	4.56	5.83	FALSE	inactive	Response Difference lower than 25%	3.43686	1.981	98.8427	104.22	1.47647	50,50,25,25,12.5,12.5,6.25,6.25,3.125,3.125,1.5625,1.5625,0.78125,0.78125,0.390625,0.390625,0.1953125,0.1953125	97.0886752136749,97.719419488597,104.083444296494,104.027717626678,96.3436928702009,94.9039881831608,100.846985393976,94.2491268917347,101.621137964662,101.340782122905,102.944269190326,98.7238979118331,103.095760445668,101.394905842401,107.57954951734,105.224384087118,99.3853427895984,105.429447852761	0.0666
214468	115	97.8	16.9	-1.13	0.737	-1.66	3.13	6.13	FALSE	inactive	Response Difference lower than 25%	4.77313	1.13324	97.6572	118.493	0.736533	50,50,25,25,12.5,12.5,6.25,6.25,3.125,3.125,1.5625,1.5625,0.78125,0.78125,0.390625,0.390625,0.1953125,0.1953125	95.6997863247859,100.276434001382,103.905903240124,96.4919878735383,99.4254374510318,94.3623830625311,100.931618094639,96.1117578579745,98.7905989781295,98.2122905027933,101.472134595163,115.60324825986,107.717283854802,103.400782124928,116.8752234537,105.876734397141,116.690307328605,113.588957055215	0.000183
214516	103	100	2.78	-2.04	1.11	-2.02	4.24	5.95	FALSE	inactive	Response Difference lower than 25%	3.8707	2.04347	100.019	102.88	1.11433	50,50,25,25,12.5,12.5,6.25,6.25,3.125,3.125,1.5625,1.5625,0.78125,0.78125,0.390625,0.390625,0.1953125,0.1953125	98.4775641025638,101.313061506565,102.751886373724,102.381983542659,97.6495168451291,98.941408173314,104.804132757224,93.5506402793942,102.032569917126,101.266294227188,102.032947774273,95.4176334106732,104.916152996051,99.9123859724446,106.936002860207,106.91630868798,97.2104018912529,101.073619631902	0.623
214529	108	71.1	36.5	-0.8	54	-398	506	4.27	FALSE	inactive	IC50 larger than highest measured concentration	6.49888	0.800207	31.3745	108.393	54.0267	50,50,25,25,12.5,12.5,6.25,6.25,3.125,3.125,1.5625,1.5625,0.78125,0.78125,0.390625,0.390625,0.1953125,0.1953125	64.9305555555555,74.637180373186,86.9507323568576,83.8458207016024,93.1574823713765,81.1176760216645,100.119766643583,92.8055878928984,95.8572782510633,97.3184357541899,111.496670171749,112.645011600928,108.504687437943,101.308391031427,117.23274937433,102.022495271332,106.146572104019,100.153374233129	1.08e-06
214630	98.2	95.9	2.28	-4.42	1.01	-5.27	7.3	6	FALSE	inactive	Response Difference lower than 25%	4.757	4.42401	95.8817	98.1616	1.01175	50,50,25,25,12.5,12.5,6.25,6.25,3.125,3.125,1.5625,1.5625,0.78125,0.78125,0.390625,0.390625,0.1953125,0.1953125	94.7916666666665,98.7560469937801,99.2010652463382,98.8306626245127,94.9334029772784,90.3249630723785,102.219543450273,88.7077997671711,96.9907748050541,93.8175046554935,101.402032947775,91.3573085846864,98.3304566321355,95.9866309399724,106.363961387201,99.1041520876256,94.4680851063831,93.4049079754605	0.815
214784	107	68	38.5	-0.782	174	-1480	1830	3.76	FALSE	inactive	IC50 larger than highest measured concentration	6.22025	0.782163	-35.8692	107.244	173.778	50,50,25,25,12.5,12.5,6.25,6.25,3.125,3.125,1.5625,1.5625,0.78125,0.78125,0.390625,0.390625,0.1953125,0.1953125	65.5181623931623,68.6247408431238,88.1047492232579,82.3733217843221,91.2248628884826,83.8749384539637,102.947959268568,90.2444703143187,100.951989185043,96.5735567970204,110.585348755696,111.136890951276,107.276541895446,98.6000506932824,116.088666428316,102.681543509673,106.713947990544,98.0061349693251	3.62e-07
214963	94.9	81.5	13.5	-9.07	66.3	-850	982	4.18	FALSE	inactive	IC50 larger than highest measured concentration	5.96688	9.07095	-93.1315	94.9351	66.3119	50,50,25,25,12.5,12.5,6.25,6.25,3.125,3.125,1.5625,1.5625,0.78125,0.78125,0.390625,0.390625,0.1953125,0.1953125	84.5352564102564,78.3690393918453,97.0705725699068,94.4997834560415,92.0605902324365,85.0566223535207,100.686458588334,85.355064027939,101.466355373205,92.1042830540037,103.505082369436,87.5870069605571,97.4951019561934,94.7672764516772,102.431176260279,96.0932937690429,95.082742316785,93.6503067484664	0.0294
215204	106	97.3	8.24	-4.7	3.02	-1.06	7.09	5.52	FALSE	inactive	Response Difference lower than 25%	5.72395	4.70309	97.2999	105.537	3.01784	50,50,25,25,12.5,12.5,6.25,6.25,3.125,3.125,1.5625,1.5625,0.78125,0.78125,0.390625,0.390625,0.1953125,0.1953125	90.8920940170941,96.4754664823776,111.007545494896,94.1533131225638,98.3807782710889,89.4387001477104,102.704236243745,96.6239813736899,100.901970771252,99.3296089385475,108.20189274448,110.904872389791,104.964759954862,101.396716316771,111.440829460136,103.057046115934,104.113475177305,100.705521472392	0.043
215216	94.1	94.6	0.55	-0.0556	2.31			5.64	FALSE	inactive	Response Difference lower than 25%	3.97809	0.055625	97.9193	90.7694	2.31375	50,50,25,25,12.5,12.5,6.25,6.25,3.125,3.125,1.5625,1.5625,0.78125,0.78125,0.390625,0.390625,0.1953125,0.1953125	94.8450854700852,92.9509329647547,98.0470483799378,96.23213512343,92.6873857404021,91.8513047759726,97.2137646049766,87.2176949941789,96.7839913626738,93.5195530726257,98.3175604626707,91.8213457076566,98.3300193881283,94.2449545958892,101.430103682517,93.3657020021922,89.7872340425535,90.0920245398777	0.997
215335	101	85.5	15.4	-5.24	61.7			4.21	FALSE	inactive	IC50 larger than highest measured concentration	6.43556	5.23609	39.2767	100.832	61.7003	50,50,25,25,12.5,12.5,6.25,6.25,3.125,3.125,1.5625,1.5625,0.78125,0.78125,0.390625,0.390625,0.1953125,0.1953125	81.276709401709,89.6337249481687,103.106968486463,98.2243395409268,98.9031078610604,89.3894633185623,104.077632247573,92.4796274738067,100.952065432625,95.0837988826815,109.954433929198,109.512761020882,102.410380464229,98.4315472572606,111.36932427601,98.9171682554479,100.425531914893,98.9877300613495	0.0208
215463	93.1	80.3	12.8	-9.87	68.2	-1130	1260	4.17	FALSE	inactive	IC50 larger than highest measured concentration	4.6672	9.87169	-193.333	93.06	68.2112	50,50,25,25,12.5,12.5,6.25,6.25,3.125,3.125,1.5625,1.5625,0.78125,0.78125,0.390625,0.390625,0.1953125,0.1953125	82.9326923076924,77.6779543883899,94.5849977807368,93.6336076223473,90.3369025855316,86.0905957656326,96.3274555304238,85.7741559953432,95.2385291231451,93.4450651769087,97.3361373992287,88.2830626450112,93.7099534590193,92.4999159422614,102.93171254916,96.9397444600807,91.1583924349884,90.6441717791409	0.00738
215474	106	94.8	11.6	-5.95	53	-291	397	4.28	FALSE	inactive	IC50 larger than highest measured concentration	5.81169	5.95196	78.2542	106.392	53.016	50,50,25,25,12.5,12.5,6.25,6.25,3.125,3.125,1.5625,1.5625,0.78125,0.78125,0.390625,0.390625,0.1953125,0.1953125	92.6549145299143,96.821008984105,112.871726586773,100.303161541793,108.931835988509,98.6952240275726,111.507353887389,100.675203725262,104.862727665749,104.990689013035,111.777076761304,117.169373549884,105.260409777796,102.177548048697,112.870933142653,102.400230520366,106.572104018913,100.582822085889	0.0609
215500	94.9	66.8	28.1	-2.64	133	-440	705	3.88	FALSE	inactive	IC50 larger than highest measured concentration	4.35994	2.63698	-302.271	94.895	132.808	50,50,25,25,12.5,12.5,6.25,6.25,3.125,3.125,1.5625,1.5625,0.78125,0.78125,0.390625,0.390625,0.1953125,0.1953125	61.7254273504272,71.5272978576366,91.4780292942743,92.5075790385448,89.3967093235829,89.0940423436733,95.2778663940544,87.124563445867,95.1888156996821,94.1899441340782,99.5793901156681,91.3573085846864,97.7891485511013,96.4269641707122,101.215588130139,98.9175868759676,93.8534278959812,93.8343558282208	3.7e-07
215582	107	105	2.79	-0.132	0.155			6.81	FALSE	inconclusive	IC50 lower than lowest measured concentration	6.37082	0.131743	99.4605	115.481	0.154766	50,50,25,25,12.5,12.5,6.25,6.25,3.125,3.125,1.5625,1.5625,0.78125,0.78125,0.390625,0.390625,0.1953125,0.1953125	98.5844017094013,107.947477539737,117.39902352419,99.2637505413599,109.0885348655,97.6612506154607,108.84184279027,101.839348079162,101.365479822221,101.266294227188,109.884332281809,116.357308584686,106.245010408229,102.356655691744,112.012870933142,103.435199985488,109.83451536643,103.282208588957	0.928
215614	99.2	92.3	6.92	-5.11	1.19	-0.159	2.53	5.92	FALSE	inactive	Response Difference lower than 25%	3.94648	5.11482	92.3136	99.2344	1.18587	50,50,25,25,12.5,12.5,6.25,6.25,3.125,3.125,1.5625,1.5625,0.78125,0.78125,0.390625,0.390625,0.1953125,0.1953125	98.9583333333333,96.4754664823776,95.7390146471372,97.0116933737549,89.1355445285975,88.6509108813393,91.3998452191203,84.5168800931313,90.1962002779989,91.0614525139664,93.7609533824046,93.6774941995356,95.8714692090947,100.875041058972,101.430103682517,100.423085805346,95.7446808510639,99.5398773006136	0.0159
216451	110	17.7	91.8	-1.2	9.56	5.95	13.2	5.02	TRUE	active		4.46033	1.20369	5.02766	110.472	9.55701	50,50,25,25,12.5,12.5,6.25,6.25,3.125,3.125,1.5625,1.5625,0.78125,0.78125,0.390625,0.390625,0.1953125,0.1953125	15.0373931623932,17.82999308915,32.7119396360408,31.8752706799481,51.3188822146774,47.0950270802561,71.2154847915516,69.1501746216532,87.8278741335415,83.0167597765363,102.663862600771,110.556844547564,104.422504511811,100.173740879735,114.158026456918,105.505138915731,110.260047281324,105.061349693252	1.11e-16
300044	101	27.3	74.2	-1.3	5.1	4.18	6.03	5.29	TRUE	active		2.78871	1.29983	23.4193	102.623	5.10366	50,50,25,25,12.5,12.5,6.25,6.25,3.125,3.125,1.5625,1.5625,0.78125,0.78125,0.390625,0.390625,0.1953125,0.1953125	31.2767094017094,28.1271596406359,27.0306258322237,31.4421827631009,40.1410289892922,43.205317577548,57.731352824392,61.9324796274737,75.9391224055806,74.4506517690875,88.9239397125833,87.2389791183293,94.641283194563,93.1104337637952,104.433321415803,100.232892549183,99.7635933806146,102.914110429448	0
300062	112	92.1	20	-6.47	2.55	0.854	4.25	5.59	FALSE	inactive	Response Difference lower than 25%	5.44894	6.47397	92.0507	112.062	2.55219	50,50,25,25,12.5,12.5,6.25,6.25,3.125,3.125,1.5625,1.5625,0.78125,0.78125,0.390625,0.390625,0.1953125,0.1953125	93.4561965811963,92.7436074637181,94.4074567243675,93.2005197055002,95.507965526247,83.1363860167408,100.689092137718,83.3993015133873,93.542249166423,99.0316573556797,109.81423063442,112.935034802784,113.665114086071,102.705818605986,118.662853056846,110.023170645771,114.8463356974,112.239263803681	2.66e-06
300189	98.7	100	1.47	-1.91	56.3			4.25	FALSE	inactive	IC50 larger than highest measured concentration	3.17889	1.90731	102.037	98.7177	56.2761	50,50,25,25,12.5,12.5,6.25,6.25,3.125,3.125,1.5625,1.5625,0.78125,0.78125,0.390625,0.390625,0.1953125,0.1953125	100.186965811966,99.4471319972357,100.798934753662,101.255954958857,96.604857665187,96.3318562284592,103.190126105118,93.4109429569263,100.437470501716,98.0633147113594,100,95.30162412993,102.952198663272,96.9526483360448,103.646764390419,100.139121552747,96.4539007092199,96.3496932515337	0.92
300227	107	72.3	34.4	-1.17	49.5	-155	254	4.31	TRUE	active		5.44633	1.17456	38.2599	106.804	49.4655	50,50,25,25,12.5,12.5,6.25,6.25,3.125,3.125,1.5625,1.5625,0.78125,0.78125,0.390625,0.390625,0.1953125,0.1953125	71.8749999999999,72.2874913614375,90.2352418996893,82.546556951061,101.253591015931,88.2077794190052,103.592939454101,98.7194412107102,103.164007786403,99.8510242085661,113.319313003856,110.904872389791,108.110876335371,99.3876070442972,114.80157311405,102.491768874029,107.186761229315,100.092024539878	2.25e-07
300389	96.1	99.2	3.11	0.0508	13.6			4.87	FALSE	inactive	Response Difference lower than 25%	4.23279	-0.0508095	76.3384	120.675	13.585	50,50,25,25,12.5,12.5,6.25,6.25,3.125,3.125,1.5625,1.5625,0.78125,0.78125,0.390625,0.390625,0.1953125,0.1953125	102.110042735042,101.105736005529,101.686640035508,96.23213512343,97.2316531731519,93.9684884293452,103.352089392243,91.2223515715949,98.5327296558104,96.7225325884544,102.103049421661,91.1832946635729,97.4457662573701,95.9008920465861,104.004290311047,96.9405817011203,94.9881796690309,93.5276073619635	0.739
300725	107	110	2.96	0.0483	34.7			4.46	FALSE	inactive	Response Difference lower than 25%	8.63169	-0.0482685	87.1108	131.593	34.6999	50,50,25,25,12.5,12.5,6.25,6.25,3.125,3.125,1.5625,1.5625,0.78125,0.78125,0.390625,0.390625,0.1953125,0.1953125	102.751068376068,108.638562543193,124.67820683533,99.090515374621,117.236876469052,99.4337764647956,116.187649970163,102.770663562281,109.031792954266,102.979515828678,115.913073957238,111.31090487239,112.635258700883,99.2150947007416,117.661780479084,102.117382589154,104.633569739953,98.8650306748465	0.963
300759	96.7	91.8	4.87	1.45	2.35	-6.64	11.3	5.63	FALSE	inactive	Response Difference lower than 25%	6.49678	-1.44818	96.8543	91.7854	2.34881	50,50,25,25,12.5,12.5,6.25,6.25,3.125,3.125,1.5625,1.5625,0.78125,0.78125,0.390625,0.390625,0.1953125,0.1953125	94.2574786324783,91.7760884588805,97.4256546826454,93.4603724556084,91.9038913554453,82.8902018709993,100.606853572859,82.9802095459838,97.0407169712631,92.6256983240223,101.051524710831,87.8190255220418,100.295431200931,92.238173076177,108.080085806221,94.3049469084525,91.8203309692673,93.0981595092023	0.6
301158	107	105	2.67	-0.032	0.00343	-0.0612	0.0681	8.46	FALSE	inconclusive	IC50 lower than lowest measured concentration	6.98624	0.0320136	78.968	139.852	0.00343416	50,50,25,25,12.5,12.5,6.25,6.25,3.125,3.125,1.5625,1.5625,0.78125,0.78125,0.390625,0.390625,0.1953125,0.1953125	98.3707264957263,102.280580511403,120.683533067022,99.3503681247293,108.931835988509,96.9719350073859,110.294724102783,101.559953434226,107.592467348879,103.277467411545,113.389414651244,111.716937354988,109.291289407072,102.269494282781,114.944583482302,102.399253739153,105.248226950355,101.380368098159	0.95
301228	94.8	20.1	74.7	-0.974	13.7	0.205	27.3	4.86	TRUE	active		5.18986	0.97377	-1.58469	96.2808	13.7426	50,50,25,25,12.5,12.5,6.25,6.25,3.125,3.125,1.5625,1.5625,0.78125,0.78125,0.390625,0.390625,0.1953125,0.1953125	20.3792735042735,17.82999308915,33.8659565024412,37.5920311823301,49.9608252807521,46.1595273264402,72.9107723541956,58.859138533178,78.2026843723716,74.1527001862197,92.429022082019,78.7122969837587,93.8562115794603,89.6232014876927,101.859134787272,94.9651114681789,89.2671394799056,90.2760736196321	1.24e-13
301350	98.9	6.52	92.4	-0.847	14	-0.198	28.2	4.85	TRUE	active		4.82855	0.847059	-26.0473	102.29	13.9925	50,50,25,25,12.5,12.5,6.25,6.25,3.125,3.125,1.5625,1.5625,0.78125,0.78125,0.390625,0.390625,0.1953125,0.1953125	4.40705128205127,4.76848652384244,26.8530847758544,25.3789519272412,44.162966832071,40.3495814869523,58.2155667907028,51.2689173457508,75.0632664311634,69.2364990689012,90.7465825446899,90.1972157772622,96.2168191008591,87.2646706617801,103.78977475867,92.7035838800402,97.3049645390069,94.1411042944782	1.11e-15
301817	94.6	81.4	13.2	-10.4	59.5			4.23	FALSE	inactive	IC50 larger than highest measured concentration	3.99087	10.392	0.452999	94.5655	59.546	50,50,25,25,12.5,12.5,6.25,6.25,3.125,3.125,1.5625,1.5625,0.78125,0.78125,0.390625,0.390625,0.1953125,0.1953125	81.8108974358973,80.9260539046304,95.9165557035064,96.3187527067995,93.6798119613472,87.075332348597,99.6381862266565,89.8719441210711,96.3733218860299,92.2532588454376,97.8969505783388,88.4570765661255,95.6263210690036,93.7218568225141,100.786557025385,98.1646281010188,94.231678486998,93.0368098159508	0.00132
301897	108	109	0.439	0.0377	4450000000	4450000000	4450000000	-3.65	FALSE	inactive	IC50 larger than highest measured concentration	7.30897	-0.0376594	105.563	115.383	4.45156e+09	50,50,25,25,12.5,12.5,6.25,6.25,3.125,3.125,1.5625,1.5625,0.78125,0.78125,0.390625,0.390625,0.1953125,0.1953125	103.231837606838,108.638562543193,123.612960497115,101.255954958857,113.006006790285,100.467749876908,115.543986559321,103.795110593714,107.025642824302,103.649906890131,116.263582194181,114.211136890952,108.748961090021,103.491305843435,118.019306399714,104.754412783554,106.572104018913,102.914110429448	1
301905	99.9	97.9	1.92	-5.04	0.924	-0.521	2.37	6.03	FALSE	inactive	Response Difference lower than 25%	3.11526	5.03859	97.9351	99.8511	0.923625	50,50,25,25,12.5,12.5,6.25,6.25,3.125,3.125,1.5625,1.5625,0.78125,0.78125,0.390625,0.390625,0.1953125,0.1953125	95.5395299145297,101.935038009676,101.864181091877,101.689042875704,94.5155393053018,96.9719350073859,100.284722600462,94.3422584400466,96.939002696877,97.3929236499068,99.1587802313353,94.4895591647328,98.8714732171652,100.090588378306,104.075795495173,101.363167952646,96.7848699763597,97.0858895705522	0.679
301913	107	109	2.12	0.0355	757			3.12	FALSE	inactive	IC50 larger than highest measured concentration	6.72261	-0.0354878	88.5053	132.04	756.753	50,50,25,25,12.5,12.5,6.25,6.25,3.125,3.125,1.5625,1.5625,0.78125,0.78125,0.390625,0.390625,0.1953125,0.1953125	102.003205128205,108.776779543884,122.902796271638,103.161541792984,114.155131888221,100.910881339242,111.021464026015,105.797438882421,106.563124991898,106.108007448789,115.282159130739,115.08120649652,108.21085946504,101.221876220454,114.158026456918,101.929561515937,106.761229314421,102.852760736196	0.97
301950	100	98.6	1.48	-2.2	1.64			5.79	FALSE	inactive	Response Difference lower than 25%	4.10798	2.19667	98.5589	100.053	1.64336	50,50,25,25,12.5,12.5,6.25,6.25,3.125,3.125,1.5625,1.5625,0.78125,0.78125,0.390625,0.390625,0.1953125,0.1953125	98.2104700854701,99.2398064961993,102.751886373724,97.3581637072326,97.9106816401145,95.9379615952733,103.512496491095,92.8055878928984,100.231449535156,100.074487895717,100.841219768665,93.0974477958239,99.9008184843445,104.44930542444,105.720414730068,102.305203662371,94.8463356973999,95.5521472392637	0.918
302024	111	108	3.33	-0.0509	0.886	-115	117	6.05	FALSE	inactive	Response Difference lower than 25%	6.82056	0.0509445	86.2791	133.597	0.886497	50,50,25,25,12.5,12.5,6.25,6.25,3.125,3.125,1.5625,1.5625,0.78125,0.78125,0.390625,0.390625,0.1953125,0.1953125	99.7061965811965,105.459571527298,121.393697292498,100.216543958424,113.371637503264,106.031511570655,111.90968840921,109.569266589057,106.406512458473,103.054003724395,114.651244304242,120.127610208817,110.860120905255,103.053429685055,115.588130139435,108.610047311096,110.96926713948,104.263803680982	0.903
302048	103	99.7	3.12	-4.09	3.41	-0.739	7.55	5.47	FALSE	inactive	Response Difference lower than 25%	2.58433	4.09246	99.6531	102.771	3.40517	50,50,25,25,12.5,12.5,6.25,6.25,3.125,3.125,1.5625,1.5625,0.78125,0.78125,0.390625,0.390625,0.1953125,0.1953125	99.3856837606833,96.821008984105,103.728362183755,101.775660459073,98.6941760250714,97.9566715903496,102.302619962663,96.9499417927822,102.084037034975,100.893854748603,103.785488958991,102.668213457077,103.341054333762,102.007622097098,107.293528780837,103.248495233657,98.2505910165486,101.380368098159	0.113
302283	113	107	6.46	-2.47	62	-450	574	4.21	FALSE	inactive	IC50 larger than highest measured concentration	5.62548	2.46923	95.8886	113.315	61.9759	50,50,25,25,12.5,12.5,6.25,6.25,3.125,3.125,1.5625,1.5625,0.78125,0.78125,0.390625,0.390625,0.1953125,0.1953125	108.680555555555,104.906703524534,120.328450954284,103.248159376353,119.744058500914,107.163958641064,116.430654754245,111.571594877765,112.735824240173,108.491620111731,117.735716789345,120.475638051044,114.894352738587,106.194861356459,117.375759742581,107.860716580652,113.380614657211,111.380368098159	0.433
302344	101	100	0.506	-0.267	7.13	-42.7	56.9	5.15	FALSE	inactive	Response Difference lower than 25%	4.0267	0.267335	99.7012	101.143	7.12589	50,50,25,25,12.5,12.5,6.25,6.25,3.125,3.125,1.5625,1.5625,0.78125,0.78125,0.390625,0.390625,0.1953125,0.1953125	100.667735042735,101.727712508638,103.106968486463,101.429190125595,100.208931835989,96.2826193993111,103.753585966534,92.2933643771823,101.413973284372,99.1806331471136,104.90711531721,96.5197215777262,104.573499442332,97.0324385279292,107.293528780837,101.081436342819,97.4468085106386,100.030674846626	0.998
302389	109	111	1.49	0.061	65500	65500	65500	1.18	FALSE	inactive	IC50 larger than highest measured concentration	7.04112	-0.0610208	103.029	122.331	65494.3	50,50,25,25,12.5,12.5,6.25,6.25,3.125,3.125,1.5625,1.5625,0.78125,0.78125,0.390625,0.390625,0.1953125,0.1953125	107.291666666666,109.329647546649,123.968042609854,100.73624945864,118.960564115957,101.895617922206,115.060610540542,106.263096623981,108.774457365021,104.841713221602,115.352260778128,116.183294663573,110.518706209558,101.742904880263,115.302109402932,105.033493130088,107.943262411348,108.006134969325	0.991
302395	99.1	95	4.15	-2.48	2.35	-3.75	8.45	5.63	FALSE	inactive	Response Difference lower than 25%	3.88617	2.48049	94.9695	99.1305	2.34647	50,50,25,25,12.5,12.5,6.25,6.25,3.125,3.125,1.5625,1.5625,0.78125,0.78125,0.390625,0.390625,0.1953125,0.1953125	94.4177350427352,94.8168624740844,98.5796715490458,94.3265482893027,96.5526247061892,91.4574101427867,100.606374745698,89.2200232828872,98.5842730212414,95.2327746741154,102.17315106905,92.9234338747096,100.000218622004,96.6880604388072,105.291383625312,100.706910517771,95.4137115839241,96.4723926380366	0.23
302413	107	97.9	9.28	-4.01	40.6	-91.1	172	4.39	FALSE	inactive	Response Difference lower than 25%	7.5114	4.00826	93.8179	107.133	40.6198	50,50,25,25,12.5,12.5,6.25,6.25,3.125,3.125,1.5625,1.5625,0.78125,0.78125,0.390625,0.390625,0.1953125,0.1953125	94.8450854700852,100.62197650311,117.754105636929,94.6730186227804,113.319404544267,98.3505662235355,115.220538812234,101.420256111758,106.767011026163,101.564245810056,115.913073957238,110.962877030162,108.897041060492,101.047036124137,115.15909903468,104.846090677391,105.295508274232,99.601226993865	0.37
302505									FALSE	inconclusive	Fit did not converge						50,50,25,25,12.5,12.5,6.25,6.25,3.125,3.125,1.5625,1.5625,0.78125,0.78125,0.390625,0.390625,0.1953125,0.1953125	102.537393162393,99.3780234968903,104.882379050155,98.7440450411434,102.298250195874,93.7715411127526,104.159751105642,90.4307334109431,100.179524931816,97.243947858473,104.135997195934,90.3132250580045,98.8707444771527,96.9439839229876,108.223096174473,96.7523420073831,94.7044917257682,94.6319018404908
302569	107	109	2.87	0.0498	67.2			4.17	FALSE	inactive	IC50 larger than highest measured concentration	6.70562	-0.0498411	88.6397	130.502	67.1842	50,50,25,25,12.5,12.5,6.25,6.25,3.125,3.125,1.5625,1.5625,0.78125,0.78125,0.390625,0.390625,0.1953125,0.1953125	105.154914529914,108.776779543884,124.323124722592,102.641836292767,111.491250979368,100.320039389464,112.959516959161,104.027939464493,104.452439427015,105.884543761639,112.618296529968,114.327146171694,107.227934936634,102.180522399448,115.016088666429,105.600305313899,106.241134751773,100.337423312884	0.932
302764	98.6	96	2.56	-11	1.09	-0.943	3.13	5.96	FALSE	inactive	Response Difference lower than 25%	4.5976	10.9819	96.0338	98.5973	1.0922	50,50,25,25,12.5,12.5,6.25,6.25,3.125,3.125,1.5625,1.5625,0.78125,0.78125,0.390625,0.390625,0.1953125,0.1953125	97.2489316239311,93.0200414651003,101.420328450954,97.2715461238631,96.2914599112038,91.8513047759726,101.089032523736,88.847497089639,99.0992491900601,96.3500931098696,100.070101647389,89.8491879350344,100.641436958706,98.4298661024884,105.720414730068,98.4455224698052,93.3806146572103,94.9386503067482	0.682
302838	101	55.3	45.7	-1.28	306	-1600	2210	3.51	FALSE	inactive	IC50 larger than highest measured concentration	6.48416	1.27585	-406.859	101.071	306.152	50,50,25,25,12.5,12.5,6.25,6.25,3.125,3.125,1.5625,1.5625,0.78125,0.78125,0.390625,0.390625,0.1953125,0.1953125	50.2938034188034,58.8113337940567,89.3475366178429,80.1212646167171,93.9409767563333,83.2840965041852,101.81649068771,90.8498253783466,99.665539981563,95.0837988826815,108.973010865756,103.538283062645,105.900243508475,95.1164393659202,110.940293171255,98.4467783313646,99.6690307328605,93.1595092024538	7.96e-08
303217	92.9	95	2.09	-0.0345	2.36			5.63	FALSE	inactive	Response Difference lower than 25%	4.8136	0.0344518	115.772	71.9214	2.36318	50,50,25,25,12.5,12.5,6.25,6.25,3.125,3.125,1.5625,1.5625,0.78125,0.78125,0.390625,0.390625,0.1953125,0.1953125	94.310897435897,96.1990324809957,98.8459831335997,95.8856647899523,93.8887437973362,89.7833579517482,99.0696986800531,86.0535506402795,95.6512572845031,89.9441340782122,99.1587802313353,88.8051044083525,95.1355875448133,93.7191411109589,101.930639971398,95.2464244574852,89.2671394799056,88.251533742331	0.93
303237	106	103	3.26	-0.0677	0.00252	-0.0243	0.0293	8.6	FALSE	inconclusive	IC50 lower than lowest measured concentration	6.69754	0.0677381	90.5539	127.398	0.00251847	50,50,25,25,12.5,12.5,6.25,6.25,3.125,3.125,1.5625,1.5625,0.78125,0.78125,0.390625,0.390625,0.1953125,0.1953125	98.6912393162388,100.691085003455,119.529516200621,99.090515374621,109.976495168451,95.4455933037912,105.046658714146,98.7194412107102,103.680585154443,99.9255121042831,110.865755345251,110.904872389791,105.112912799334,100.785163938454,113.299964247408,102.681403969499,105.200945626478,103.711656441718	0.905
303289	98.5	94.4	4.07	-1.87	2.91	-5.8	11.6	5.54	FALSE	inactive	Response Difference lower than 25%	3.41369	1.8672	94.38	98.4931	2.91308	50,50,25,25,12.5,12.5,6.25,6.25,3.125,3.125,1.5625,1.5625,0.78125,0.78125,0.390625,0.390625,0.1953125,0.1953125	91.1057692307691,92.7436074637181,96.9818020417221,99.0038977912516,92.582919822408,94.4116198916793,97.3762067192618,92.5261932479627,97.4518439333992,97.094972067039,100.841219768665,90.6032482598604,98.0831222720075,100.610711800931,101.144082946013,101.835371898981,94.8936170212769,95.7361963190181	0.185
303397	105	79.8	25	-0.848	46.3	-374	467	4.33	FALSE	inactive	Response Difference lower than 25%	5.35118	0.848262	55.9642	105.264	46.3209	50,50,25,25,12.5,12.5,6.25,6.25,3.125,3.125,1.5625,1.5625,0.78125,0.78125,0.390625,0.390625,0.1953125,0.1953125	75.6677350427353,81.133379405667,93.9636040834443,89.6491987873538,92.7396186993992,83.4810438207778,99.3142596524074,96.7171129220025,98.7403518215925,97.8398510242086,110.445145460918,108.52668213457,105.949943577304,97.820900116129,111.01179835538,101.460427453413,103.54609929078,99.5398773006136	1.3e-05
303478	99.5	97.5	1.95	-2.96	1.44	-2.61	5.5	5.84	FALSE	inactive	Response Difference lower than 25%	3.90962	2.9594	97.5167	99.4745	1.44319	50,50,25,25,12.5,12.5,6.25,6.25,3.125,3.125,1.5625,1.5625,0.78125,0.78125,0.390625,0.390625,0.1953125,0.1953125	96.6613247863249,97.857636489288,101.686640035508,99.5236032914681,95.560198485244,95.5440669620874,101.252192878763,92.8521536670543,99.718379555888,95.754189944134,100.981423063442,92.6334106728538,101.278792973343,103.141367011605,105.648909545942,98.5445959928248,94.373522458629,95.5521472392637	0.797
303592	107	95.4	11.9	-1.05	34.5	-125	194	4.46	FALSE	inactive	Response Difference lower than 25%	5.44829	1.04612	87.2808	107.476	34.4993	50,50,25,25,12.5,12.5,6.25,6.25,3.125,3.125,1.5625,1.5625,0.78125,0.78125,0.390625,0.390625,0.1953125,0.1953125	89.2895299145295,97.719419488597,109.232134931203,98.1377219575573,103.917471924784,95.5933037912363,105.855517495447,101.699650756693,100.43647928315,104.841713221602,113.739922888188,115.371229698376,105.652180408335,104.188338475943,109.939220593493,103.999639986353,109.408983451536,102.668711656442	0.0236
303693	101	49.4	51.9	-1.49	5.59	4.18	7	5.25	TRUE	active		3.13683	1.49228	47.4489	101.651	5.59172	50,50,25,25,12.5,12.5,6.25,6.25,3.125,3.125,1.5625,1.5625,0.78125,0.78125,0.390625,0.390625,0.1953125,0.1953125	52.7510683760683,50.7947477539738,39.2809587217044,47.1199653529666,55.1318882214677,63.6878385032004,73.3135857031787,74.0395809080322,87.0544949093298,86.1452513966481,92.7795303189626,92.1693735498836,97.3454916316966,96.7741872909872,103.503754022167,103.716373434621,99.2434988179667,102.791411042945	1.82e-14
303861	114	112	2.02	-0.0768	2.17			5.66	FALSE	inactive	Response Difference lower than 25%	5.95301	0.0767503	104.068	123.126	2.16637	50,50,25,25,12.5,12.5,6.25,6.25,3.125,3.125,1.5625,1.5625,0.78125,0.78125,0.390625,0.390625,0.1953125,0.1953125	106.490384615384,110.158949550794,124.234354194408,103.161541792984,121.781143901802,111.349089118661,114.814613086706,112.409778812572,111.965189928914,110.130353817505,119.348054679286,118.677494199536,114.745471154102,108.286347212775,119.020378977476,111.523925209258,113.475177304965,110.766871165645	0.964
303893	98	95.9	2.08	-6.36	1.14	-0.89	3.18	5.94	FALSE	inactive	Response Difference lower than 25%	3.21934	6.35896	95.9012	97.985	1.14321	50,50,25,25,12.5,12.5,6.25,6.25,3.125,3.125,1.5625,1.5625,0.78125,0.78125,0.390625,0.390625,0.1953125,0.1953125	96.8749999999999,98.7560469937801,98.2245894363072,99.3503681247293,94.2543745103158,91.9005416051208,98.8294471521456,90.2910360884746,97.1963382861221,93.8919925512104,98.9484752891694,92.6334106728538,99.757110953946,96.8592795863842,102.145155523775,97.5983740779011,96.5011820330969,94.8773006134967	0.6
303934	103	93.8	8.84	-2.9	5.03	-3.43	13.5	5.3	FALSE	inactive	Response Difference lower than 25%	5.99798	2.89734	93.7663	102.621	5.02782	50,50,25,25,12.5,12.5,6.25,6.25,3.125,3.125,1.5625,1.5625,0.78125,0.78125,0.390625,0.390625,0.1953125,0.1953125	91.8002136752136,92.6744989633725,101.1540168664,91.5547856214811,99.8433011230084,85.8444116198919,101.414754699838,94.4819557625144,101.468490305501,96.3500931098696,111.286365229583,102.204176334107,106.096055949743,94.939530156037,111.083303539506,99.3883954205707,102.978723404255,95.0613496932519	0.0539
303941	96.7	95	1.77	-2.93	4.93	-7.13	17	5.31	FALSE	inactive	Response Difference lower than 25%	3.84337	2.93498	94.9628	96.7388	4.93242	50,50,25,25,12.5,12.5,6.25,6.25,3.125,3.125,1.5625,1.5625,0.78125,0.78125,0.390625,0.390625,0.1953125,0.1953125	95.8600427350429,94.5404284727025,97.8695073235686,95.7124296232135,93.9932097153304,91.8020679468244,100.361694066553,89.8253783469151,97.4522251713089,98.2867783985102,101.261829652997,92.0533642691413,98.8671007770921,95.2047646512638,102.788702180908,96.8442989815661,93.4278959810873,91.5030674846624	0.821
303949	106	108	2.08	0.0579	374			3.43	FALSE	inactive	IC50 larger than highest measured concentration	6.40068	-0.0579169	95.7665	122.235	373.903	50,50,25,25,12.5,12.5,6.25,6.25,3.125,3.125,1.5625,1.5625,0.78125,0.78125,0.390625,0.390625,0.1953125,0.1953125	103.178418803419,107.740152038701,119.529516200621,99.2637505413599,116.139984330112,101.698670605613,112.634273610219,104.679860302677,105.276447045673,104.990689013035,112.758499824746,107.598607888631,107.568548018319,100.434707828233,115.15909903468,102.776430827494,106.61938534279,101.257668711656	0.969
303965	97.1	95	2.08	-0.744	16.5			4.78	FALSE	inactive	Response Difference lower than 25%	4.35413	0.744212	94.0712	97.2181	16.5118	50,50,25,25,12.5,12.5,6.25,6.25,3.125,3.125,1.5625,1.5625,0.78125,0.78125,0.390625,0.390625,0.1953125,0.1953125	94.5245726495727,92.7436074637181,99.8224589436307,97.2715461238631,96.657090624184,92.6883308714919,100.445009992524,88.5215366705467,99.3580334833628,95.6797020484171,101.402032947775,89.5011600928074,99.9551096152507,96.5111512289242,103.074722917411,96.7506675253039,95.886524822695,92.7300613496935	0.896
303992	107	107	0.308	0.0421	921000000	921000000	921000000	-2.96	FALSE	inactive	IC50 larger than highest measured concentration	5.19274	-0.0421312	104.772	110.99	9.21293e+08	50,50,25,25,12.5,12.5,6.25,6.25,3.125,3.125,1.5625,1.5625,0.78125,0.78125,0.390625,0.390625,0.1953125,0.1953125	101.575854700854,105.73600552868,119.618286728806,102.901689042876,111.439018020371,100.467749876908,108.762716601955,104.121071012805,104.657697917755,105.437616387337,110.445145460918,107.946635730859,108.307271768648,103.22839910097,112.656417590275,102.021378949946,105.721040189126,105.061349693252	1
304045	98	92.1	5.88	-2.62	2.37	-2.56	7.31	5.63	FALSE	inactive	Response Difference lower than 25%	3.89822	2.61691	92.1025	97.994	2.37372	50,50,25,25,12.5,12.5,6.25,6.25,3.125,3.125,1.5625,1.5625,0.78125,0.78125,0.390625,0.390625,0.1953125,0.1953125	92.2275641025643,91.8451969592261,95.7390146471372,95.8856647899523,91.3293288064767,86.8783850320038,94.1454401588749,88.1024447031432,95.7045543443202,95.3072625698324,99.7896950578341,90.9512761020882,97.8393587379391,96.6876724800137,104.790847336432,100.895150211508,94.420803782506,93.6503067484664	0.0487
304164	102	93.8	7.89	-6.85	59.3	-706	825	4.23	FALSE	inactive	IC50 larger than highest measured concentration	6.22601	6.85078	68.5188	101.678	59.2645	50,50,25,25,12.5,12.5,6.25,6.25,3.125,3.125,1.5625,1.5625,0.78125,0.78125,0.390625,0.390625,0.1953125,0.1953125	91.8536324786324,95.7152729785764,109.498446515757,94.8462537895192,107.62601201358,93.9684884293452,107.872936030487,95.1804423748543,101.673520053495,98.659217877095,111.216263582194,102.320185614849,105.162175624157,98.6935487625408,109.152663568108,97.6953544983217,98.2978723404256,94.8159509202452	0.343
304412	95.6	86.2	9.4	-0.95	373	-3810	4550	3.43	FALSE	inactive	IC50 larger than highest measured concentration	3.5669	0.950227	22.4482	95.6377	372.563	50,50,25,25,12.5,12.5,6.25,6.25,3.125,3.125,1.5625,1.5625,0.78125,0.78125,0.390625,0.390625,0.1953125,0.1953125	84.2147435897432,86.8002764340014,92.3657345761208,93.3737548722391,93.0007834943846,88.6509108813393,97.0532377993343,89.5459837019788,95.4963984454641,95.5307262569832,98.3876621100593,88.8051044083525,99.9517574111948,95.7299315382048,100.429031104755,95.813236641296,92.1513002364065,93.2208588957053	0.00874
304518	106	108	1.9	0.0452	34.5			4.46	FALSE	inactive	Response Difference lower than 25%	6.88217	-0.0451615	92.9949	123.497	34.4928	50,50,25,25,12.5,12.5,6.25,6.25,3.125,3.125,1.5625,1.5625,0.78125,0.78125,0.390625,0.390625,0.1953125,0.1953125	104.513888888889,105.390463026952,121.748779405238,100.563014291901,116.453382084095,99.7784342688333,112.151615832181,103.608847497089,106.820079343234,101.936685288641,114.230634419909,110.208816705336,109.390179426722,102.704266770812,114.229531641044,104.845253436351,105.342789598109,99.6625766871165	0.98
400393	98.7	96.8	1.95	-2.87	1.89	-2.06	5.85	5.72	FALSE	inactive	Response Difference lower than 25%	3.61961	2.86696	96.7823	98.7358	1.89349	50,50,25,25,12.5,12.5,6.25,6.25,3.125,3.125,1.5625,1.5625,0.78125,0.78125,0.390625,0.390625,0.1953125,0.1953125	97.8899572649569,98.7560469937801,99.1122947181536,101.255954958857,93.3664142073648,93.1806991629741,98.6679626921818,92.9918509895228,95.8571257558997,96.3500931098696,102.663862600771,94.953596287703,96.4617486189466,103.488719451478,101.001072577762,101.64866714715,95.177304964539,94.0797546012267	0.747
400401	104	85.6	18.6	-3.66	64.9	-452	582	4.19	FALSE	inactive	IC50 larger than highest measured concentration	5.00788	3.6574	37.3427	104.247	64.8992	50,50,25,25,12.5,12.5,6.25,6.25,3.125,3.125,1.5625,1.5625,0.78125,0.78125,0.390625,0.390625,0.1953125,0.1953125	79.8878205128201,91.3614374568072,109.587217043941,95.1927241229969,106.738051710629,99.9261447562778,106.337576739534,102.351571594877,101.210620983182,102.383612662942,111.076060287417,109.048723897912,104.279671469428,97.7332214287747,108.366106542725,101.553082128462,103.687943262411,104.20245398773	0.000432
400409	96.3	84.1	12.2	-2.35	6.58	2.57	10.6	5.18	FALSE	inactive	Response Difference lower than 25%	2.64368	2.34892	83.9658	96.2574	6.57546	50,50,25,25,12.5,12.5,6.25,6.25,3.125,3.125,1.5625,1.5625,0.78125,0.78125,0.390625,0.390625,0.1953125,0.1953125	53.3386752136751,81.271596406358,86.9507323568576,86.9640537029017,82.4497257769648,86.632200886263,95.3596261317529,87.5902211874271,93.5408767099472,93.8919925512104,95.9341044514549,95.30162412993,96.5107928217653,97.3821187205637,97.783339292099,98.9163310144083,93.2860520094563,94.5092024539878	2.77e-06
400413									FALSE	inconclusive	Fit did not converge						50,50,25,25,12.5,12.5,6.25,6.25,3.125,3.125,1.5625,1.5625,0.78125,0.78125,0.390625,0.390625,0.1953125,0.1953125	101.575854700854,102.211472011057,121.304926764314,100.822867042009,111.282319143379,100.320039389464,110.779656309835,105.657741559953,107.075889980839,101.042830540037,115.001752541185,108.52668213457,107.177287505789,102.183238111003,114.873078298176,102.024448833758,104.397163120568,104.877300613497
400465	104	99.2	4.57	-2.05	1.22	-0.625	3.07	5.91	FALSE	inactive	Response Difference lower than 25%	2.26716	2.05	99.19	103.867	1.21991	50,50,25,25,12.5,12.5,6.25,6.25,3.125,3.125,1.5625,1.5625,0.78125,0.78125,0.390625,0.390625,0.1953125,0.1953125	96.0202991452992,100.138217000691,98.0470483799378,104.634040710264,96.448158788195,99.7784342688333,100.444770578944,98.6263096623983,99.2026409112499,99.7765363128491,100.350508236943,102.436194895592,102.113054539267,101.394905842401,103.575259206293,106.067764894344,100.945626477541,104.877300613497	0.0129
400489	113	101	12.4	-2.33	32.1	-102	166	4.49	FALSE	inactive	Response Difference lower than 25%	5.35168	2.32543	96.241	113.057	32.1369	50,50,25,25,12.5,12.5,6.25,6.25,3.125,3.125,1.5625,1.5625,0.78125,0.78125,0.390625,0.390625,0.1953125,0.1953125	100.026709401709,101.313061506565,115.446071904128,98.7440450411434,114.886393314181,106.967011324471,113.442055030409,115.3434225844,110.061364053992,109.385474860335,116.33368384157,116.531322505801,119.216145380718,104.011170626864,118.305327136217,107.851506929216,114.137115839244,111.932515337423	0.02
400497	100	88	12	-0.501	39.7	-633	713	4.4	FALSE	inactive	Response Difference lower than 25%	3.54143	0.500548	75.7862	101.785	39.7219	50,50,25,25,12.5,12.5,6.25,6.25,3.125,3.125,1.5625,1.5625,0.78125,0.78125,0.390625,0.390625,0.1953125,0.1953125	88.3279914529912,83.8977194194886,92.8983577452286,96.4919878735383,91.6427265604592,90.5219103889711,95.8433612709031,88.9406286379509,96.9361052887611,95.3817504655493,99.4391868208909,92.8074245939673,101.377391496989,99.9153603231956,103.289238469789,102.024727914105,97.0685579196218,96.9631901840492	0.000583
400532	105	76.3	28.8	-0.515	163	-2920	3250	3.79	FALSE	inactive	IC50 larger than highest measured concentration	6.65447	0.51528	18.3577	107.862	162.686	50,50,25,25,12.5,12.5,6.25,6.25,3.125,3.125,1.5625,1.5625,0.78125,0.78125,0.390625,0.390625,0.1953125,0.1953125	70.1655982905982,77.194194885971,91.5667998224589,89.0428757037678,91.6427265604592,80.3298867552933,94.9508274432605,85.6344586728754,97.5041497746502,91.731843575419,108.271994391868,103.016241299304,108.061977880555,97.8168912085951,114.730067929925,99.9513004795299,102.789598108747,99.3558282208591	4.08e-05
400594	97.3	83.3	14	-1.97	4.2	1.39	7.02	5.38	FALSE	inactive	Response Difference lower than 25%	3.06615	1.96599	83.1595	97.3236	4.20265	50,50,25,25,12.5,12.5,6.25,6.25,3.125,3.125,1.5625,1.5625,0.78125,0.78125,0.390625,0.390625,0.1953125,0.1953125	82.8258547008542,81.7553559087768,84.7314691522414,86.0978778692074,85.3225385218075,81.6592811422948,91.8840591854312,83.8649592549474,94.1064050256308,90.9869646182495,100.140203294777,89.5011600928074,97.1483674584063,96.7716008990299,100.572041473007,97.5993508591139,95.2718676122931,96.1656441717793	8.85e-07
400735	106	66.4	39.9	-1.19	135	-283	554	3.87	FALSE	inactive	IC50 larger than highest measured concentration	4.1028	1.18756	-63.9218	106.379	135.372	50,50,25,25,12.5,12.5,6.25,6.25,3.125,3.125,1.5625,1.5625,0.78125,0.78125,0.390625,0.390625,0.1953125,0.1953125	66.6399572649571,64.8928818244645,92.4545051043054,84.365526201819,101.044659179943,90.2264894140815,102.704954484486,98.0675203725262,104.194951342605,102.085661080074,111.636873466526,106.032482598608,105.89871315445,103.052783087066,112.799427958527,105.879943821126,106.052009456265,102.177914110429	4.15e-10
400796	98.4	99.4	0.973	-0.0806	5.3	-699	710	5.28	FALSE	inactive	Response Difference lower than 25%	3.8616	0.0805515	103.38	94.6289	5.29805	50,50,25,25,12.5,12.5,6.25,6.25,3.125,3.125,1.5625,1.5625,0.78125,0.78125,0.390625,0.390625,0.1953125,0.1953125	99.1185897435895,101.727712508638,101.509098979139,99.8700736249458,98.6419430660743,98.1043820777941,100.52473471479,91.4551804423746,100.127905318802,94.7113594040968,103.575184016825,94.4315545243617,100.739233868338,99.7374165565295,105.648909545942,99.6685920884908,94.8936170212769,95.9202453987734	0.984
400803	107	17.2	89.3	-0.757	12.8	1.53	24	4.89	TRUE	active		3.62458	0.757292	-16.4548	111.695	12.7641	50,50,25,25,12.5,12.5,6.25,6.25,3.125,3.125,1.5625,1.5625,0.78125,0.78125,0.390625,0.390625,0.1953125,0.1953125	17.7083333333333,15.8258465791293,29.1611185086551,35.7730619315721,44.9464612170279,50.4923682914821,60.1529014831072,70.3608847497091,74.447719701689,77.8026070763501,92.3589204346303,94.6635730858471,97.1010722316173,93.633919495964,107.651054701466,102.965228681924,105.768321513003,105	0
401020	100	96.9	3.32	-12	1.16	-0.698	3.02	5.94	FALSE	inactive	Response Difference lower than 25%	4.11325	11.9922	96.8631	100.178	1.16324	50,50,25,25,12.5,12.5,6.25,6.25,3.125,3.125,1.5625,1.5625,0.78125,0.78125,0.390625,0.390625,0.1953125,0.1953125	95.4326923076922,95.5770559778855,102.130492676431,100.996102208748,96.5526247061892,92.3929098966029,100.52509383516,90.523864959255,99.3041264428899,96.2756052141526,101.121626358219,91.6473317865431,101.920157058047,102.09361962968,104.576331784055,100.515740480395,96.7848699763597,95.1840490797549	0.388
401029	102	88	14.4	-4.73	86.8	-289	463	4.06	FALSE	inactive	IC50 larger than highest measured concentration	5.36967	4.73007	-107.124	102.382	86.7896	50,50,25,25,12.5,12.5,6.25,6.25,3.125,3.125,1.5625,1.5625,0.78125,0.78125,0.390625,0.390625,0.1953125,0.1953125	85.9775641025641,89.8410504492053,111.451398135819,96.838458207016,107.939409767563,94.1654357459378,103.915429546868,99.2316647264262,101.313021485806,101.638733705773,107.570977917981,106.14849187935,101.672458327913,98.6952299173131,110.153736145871,99.3871395590112,100.898345153664,96.1042944785278	0.00897
401123	92.2	79.6	12.5	-9.76	68.3	-483	620	4.17	FALSE	inactive	IC50 larger than highest measured concentration	4.16043	9.75644	-185.285	92.1765	68.3489	50,50,25,25,12.5,12.5,6.25,6.25,3.125,3.125,1.5625,1.5625,0.78125,0.78125,0.390625,0.390625,0.1953125,0.1953125	79.0865384615381,80.1658604008293,92.54327563249,95.6258120398441,92.2172891094277,85.450516986706,89.8689150794046,84.5168800931313,92.6663931920059,89.4972067039106,96.7052225727309,88.8051044083525,93.61171930538,95.554703483094,99.4279585269928,95.4361990931284,92.7186761229314,90.1533742331292	0.00316
401124	107	64.4	42.4	-0.674	10.3	-55.8	76.4	4.99	TRUE	active		7.47636	0.674303	48.3705	110.866	10.322	50,50,25,25,12.5,12.5,6.25,6.25,3.125,3.125,1.5625,1.5625,0.78125,0.78125,0.390625,0.390625,0.1953125,0.1953125	50.5608974358973,69.1085003455426,80.9143364403018,77.6959722823732,81.0916688430402,73.3382570162482,82.9224497515785,76.461001164144,88.3429265499413,85.3258845437616,105.397826848931,103.074245939675,103.588607315894,99.0434875943709,114.372542009296,101.835790519501,104.775413711584,100.644171779141	6.03e-07
401164	97.4	78.9	18.4	-2.57	2.12	0.671	3.56	5.67	FALSE	inactive	Response Difference lower than 25%	5.03597	2.57257	78.9322	97.4186	2.11557	50,50,25,25,12.5,12.5,6.25,6.25,3.125,3.125,1.5625,1.5625,0.78125,0.78125,0.390625,0.390625,0.1953125,0.1953125	69.1506410256409,80.5805114029026,79.7603195739015,90.688609787787,76.3384695743014,74.766125061546,84.2976413572595,78.9755529685678,82.8885557716747,84.5810055865922,94.391868208903,87.9930394431554,93.1690826219923,100.002521732158,100.429031104755,98.727533159978,94.7990543735229,94.8159509202452	1.07e-05
401183	104	40.8	63.1	-0.991	53	-94.3	200	4.28	FALSE	inactive	IC50 larger than highest measured concentration	4.39107	0.991412	-26.5798	104.424	52.9836	50,50,25,25,12.5,12.5,6.25,6.25,3.125,3.125,1.5625,1.5625,0.78125,0.78125,0.390625,0.390625,0.1953125,0.1953125	42.0673076923077,39.0463026952316,67.5099866844207,58.9865742745778,83.0765212849304,72.4027572624326,92.2079857596802,90.6635622817229,96.0100021578063,92.9236499068901,106.51945320715,102.900232018561,103.786751725201,97.1221863288495,109.295673936361,100.799704732993,105.910165484634,98.5582822085892	3.35e-13
401319	97.8	87.9	9.89	-11	1.5	0.591	2.4	5.82	FALSE	inactive	Response Difference lower than 25%	4.0634	11.0148	87.8761	97.7613	1.49628	50,50,25,25,12.5,12.5,6.25,6.25,3.125,3.125,1.5625,1.5625,0.78125,0.78125,0.390625,0.390625,0.1953125,0.1953125	90.4647435897434,87.8369039391846,92.1881935197514,94.3265482893027,85.4792373987987,86.4844903988185,88.5745255571005,80.46565774156,88.2903157183625,84.6554934823091,93.8310550297933,89.5011600928074,95.7759313935004,99.7378045153231,104.504826599929,98.353425955449,94.6572104018912,93.5276073619635	0.000677
401390	106	76	30	-1.82	129	-293	551	3.89	FALSE	inactive	IC50 larger than highest measured concentration	4.63654	1.81516	-91.8182	105.998	129.064	50,50,25,25,12.5,12.5,6.25,6.25,3.125,3.125,1.5625,1.5625,0.78125,0.78125,0.390625,0.390625,0.1953125,0.1953125	73.5309829059831,77.4015203870077,100.532623169108,97.5313988739714,108.409506398537,94.5100935499756,100.121921365807,98.25378346915,103.93685327754,103.724394785848,111.005958640028,107.308584686775,109.682549919602,103.230985492928,111.36932427601,106.44773278615,109.314420803782,104.570552147239	3.2e-07
401406	103	90.2	12.3	-2.76	0.911	0.374	1.45	6.04	FALSE	inactive	Response Difference lower than 25%	2.92	2.7567	90.2451	102.725	0.911482	50,50,25,25,12.5,12.5,6.25,6.25,3.125,3.125,1.5625,1.5625,0.78125,0.78125,0.390625,0.390625,0.1953125,0.1953125	90.8920940170941,90.1865929509331,91.4780292942743,95.7990472065829,87.1506920867065,88.5032003938948,92.2099010683233,84.7962747380677,93.2338276972392,88.975791433892,95.0227830354014,90.4872389791181,98.2299633844584,96.7721181774213,103.360743653914,100.800681514206,99.5271867612295,105	4.7e-06
401687	113	103	10.3	-3.44	52.1	-2270	2370	4.28	FALSE	inactive	IC50 larger than highest measured concentration	5.48712	3.43713	90.6173	112.801	52.1454	50,50,25,25,12.5,12.5,6.25,6.25,3.125,3.125,1.5625,1.5625,0.78125,0.78125,0.390625,0.390625,0.1953125,0.1953125	101.095085470085,103.939184519696,118.996893031514,102.901689042876,118.960564115957,109.330379123584,115.381544445036,111.990686845169,108.157309436325,110.130353817505,120.539782684893,117.169373549884,115.140375366693,106.546352023464,118.448337504469,108.140076007532,111.063829787234,108.251533742331	0.0881
401751	101	94	7.15	-2.59	1.98	-0.478	4.44	5.7	FALSE	inactive	Response Difference lower than 25%	3.32321	2.59384	93.9782	101.15	1.97928	50,50,25,25,12.5,12.5,6.25,6.25,3.125,3.125,1.5625,1.5625,0.78125,0.78125,0.390625,0.390625,0.1953125,0.1953125	95.9668803418804,92.6744989633725,94.8513093652908,96.1455175400606,95.3512666492558,89.3894633185623,97.6182538490222,89.4994179278229,97.9671250925451,95.3072625698324,100.771118121276,95.0696055684453,102.359878781386,98.3447738070914,104.361816231677,105.603793818231,97.5413711583927,97.8834355828221	0.004
401813	107	90.2	17	-2.22	4.19	1.41	6.96	5.38	FALSE	inactive	Response Difference lower than 25%	3.69668	2.22105	90.1791	107.297	4.18646	50,50,25,25,12.5,12.5,6.25,6.25,3.125,3.125,1.5625,1.5625,0.78125,0.78125,0.390625,0.390625,0.1953125,0.1953125	88.595085470085,91.0850034554251,94.7625388371061,85.9246427024686,96.5003917471921,87.3215164943378,96.4869049749544,95.8323632130382,100.026419787162,97.9888268156424,109.884332281809,110.092807424594,102.75194090793,103.051619210685,109.581694672864,108.515997234314,109.03073286052,104.263803680982	5.81e-07
401928	97.5	74.9	22.6	-0.731	217	-2170	2600	3.66	FALSE	inactive	IC50 larger than highest measured concentration	3.3934	0.730751	7.42849	98.0353	216.695	50,50,25,25,12.5,12.5,6.25,6.25,3.125,3.125,1.5625,1.5625,0.78125,0.78125,0.390625,0.390625,0.1953125,0.1953125	76.4155982905985,73.0476848652385,82.1571238348869,83.759203118233,89.2400104465916,86.9276218611519,96.4064620119479,86.519208381839,94.1092261861642,93.2960893854749,100.350508236943,89.9071925754064,99.6572735722803,94.2461184722701,101.930639971398,97.0330968359964,96.643026004728,94.6932515337423	1.24e-07
401956	108	106	1.67	-0.0902	0.181	-24.1	24.4	6.74	FALSE	inconclusive	IC50 lower than lowest measured concentration	5.79893	0.0901825	100.928	114.597	0.180911	50,50,25,25,12.5,12.5,6.25,6.25,3.125,3.125,1.5625,1.5625,0.78125,0.78125,0.390625,0.390625,0.1953125,0.1953125	101.041666666667,105.459571527298,117.931646693298,98.2243395409268,112.326978323322,101.058591826687,109.486463855432,105.192083818393,105.635954394796,104.096834264432,114.861549246408,107.598607888631,107.225894464601,104.798597658281,114.944583482302,106.726813132684,105.626477541371,101.871165644172	0.978
401982	96.6	21.3	75.3	-0.971	8.56	3.02	14.1	5.07	TRUE	active		4.39814	0.97117	7.38918	98.8811	8.55548	50,50,25,25,12.5,12.5,6.25,6.25,3.125,3.125,1.5625,1.5625,0.78125,0.78125,0.390625,0.390625,0.1953125,0.1953125	19.2040598290598,18.1064270905321,35.907678650688,37.9385015158076,43.4317054061112,40.2018709995077,61.4468121782507,57.1362048894062,75.1154197772501,72.5884543761639,90.3259726603576,79.1183294663573,93.0210026515208,88.9225479064451,101.787629603146,94.3053655289724,94.373522458629,91.8098159509206	4.55e-15
402186	108	106	1.46	0.0889	80700000	80700000	80700000	-1.91	FALSE	inactive	IC50 larger than highest measured concentration	4.15687	-0.0888649	110.484	90.4823	8.07035e+07	50,50,25,25,12.5,12.5,6.25,6.25,3.125,3.125,1.5625,1.5625,0.78125,0.78125,0.390625,0.390625,0.1953125,0.1953125	104.407051282051,107.049067035245,121.837549933422,102.122130792551,114.677461478192,103.077301821763,109.56726593881,104.679860302677,105.275532074689,105.288640595903,113.6698212408,105.858468677494,108.307490390652,105.145044860969,113.299964247408,104.094527304175,106.099290780142,104.570552147239	0.964
402538	101	9.18	91.7	-0.703	469	-3000	3940	3.33	FALSE	inactive	IC50 larger than highest measured concentration	3.62176	0.703109	-444.645	103.221	469.01	50,50,25,25,12.5,12.5,6.25,6.25,3.125,3.125,1.5625,1.5625,0.78125,0.78125,0.390625,0.390625,0.1953125,0.1953125	8.36004273504271,9.05321354526608,40.1686640035508,45.7340840190558,60.9819796291459,64.1802067946825,82.1171821739831,70.5471478463329,88.1874577302467,89.5716945996276,96.4248159831754,91.2993039443153,96.7072611290441,95.3772769948194,104.790847336432,102.306319983757,96.1229314420807,99.601226993865	0
403944	103	55.9	47.3	-0.765	15.4	-31.4	62.2	4.81	TRUE	active		5.59834	0.764708	35.6798	105.645	15.4282	50,50,25,25,12.5,12.5,6.25,6.25,3.125,3.125,1.5625,1.5625,0.78125,0.78125,0.390625,0.390625,0.1953125,0.1953125	52.8044871794871,56.046993780235,69.7292498890368,66.6089216110871,78.8978845651602,61.6691285081241,85.2622386725954,82.0954598370195,86.2348334028457,86.8901303538175,103.084472485103,95.707656612529,97.4931343581602,95.2917967406289,111.083303539506,99.9521377205694,103.120567375887,98.128834355828	1.29e-09
404075	95.6	83	12.6	-1.03	10.7	-42.9	64.4	4.97	FALSE	inactive	Response Difference lower than 25%	4.7407	1.03126	80.3885	95.8691	10.7491	50,50,25,25,12.5,12.5,6.25,6.25,3.125,3.125,1.5625,1.5625,0.78125,0.78125,0.390625,0.390625,0.1953125,0.1953125	88.9155982905982,74.7753973738771,93.0758988015979,81.8536162841056,87.9864194306604,84.3180699162978,93.6624232604659,86.519208381839,95.2915211926343,88.6033519553072,97.6165439887842,90.9512761020882,94.645509886634,97.1242554424153,101.001072577762,94.4934656825363,93.3333333333333,92.1165644171779	0.00333
404118	105	80.5	24.7	-1.88	5.67	0.108	11.2	5.25	FALSE	inactive	Response Difference lower than 25%	7.11561	1.87594	80.0693	105.209	5.67018	50,50,25,25,12.5,12.5,6.25,6.25,3.125,3.125,1.5625,1.5625,0.78125,0.78125,0.390625,0.390625,0.1953125,0.1953125	70.8066239316238,84.2432619212164,82.3346648912561,91.9878735383283,81.9273961869941,78.3604135893652,102.62499034864,88.242142025611,98.791437701532,89.5716945996276,113.529617946021,102.784222737819,103.392576252622,102.618010599034,113.514479799785,101.835511439155,103.167848699764,100.705521472392	4.91e-05
404241	96	96.7	0.703	-0.0753	53.5	-3960	4070	4.27	FALSE	inactive	IC50 larger than highest measured concentration	3.31853	0.0752516	100.161	93.3166	53.4828	50,50,25,25,12.5,12.5,6.25,6.25,3.125,3.125,1.5625,1.5625,0.78125,0.78125,0.390625,0.390625,0.1953125,0.1953125	98.1036324786326,97.9267449896335,98.8459831335997,97.3581637072326,95.3512666492558,91.9497784342689,99.7183897760825,90.8032596041907,96.9903935671437,95.1582867783985,100.841219768665,91.2993039443153,97.5938462278417,96.4263175727228,100.286020736503,98.1664421232712,93.3806146572103,94.5705521472393	0.991
404376	105	65.5	39.5	-0.855	112	-504	728	3.95	FALSE	inactive	IC50 larger than highest measured concentration	3.21584	0.855434	-14.4591	105.525	112.41	50,50,25,25,12.5,12.5,6.25,6.25,3.125,3.125,1.5625,1.5625,0.78125,0.78125,0.390625,0.390625,0.1953125,0.1953125	64.4497863247862,66.1368348306842,81.0918774966711,79.6881766998701,92.1650561504306,85.2535696701134,97.0539560400755,97.0896391152501,95.8563632800796,98.5102420856611,107.290571328426,104.408352668213,105.851563675662,100.436130343809,110.296746514123,103.058860138187,104.160756501182,101.196319018405	6.15e-12
404882	101	89.1	11.7	-2.39	1.42	0.539	2.31	5.85	FALSE	inactive	Response Difference lower than 25%	2.63341	2.38744	89.1089	100.953	1.42486	50,50,25,25,12.5,12.5,6.25,6.25,3.125,3.125,1.5625,1.5625,0.78125,0.78125,0.390625,0.390625,0.1953125,0.1953125	90.1442307692309,91.6378714581894,90.8566355969818,92.5075790385448,84.4868111778529,86.7799113737075,89.7068320854898,85.2619324796271,92.9223563247752,91.4338919925512,95.5835962145107,92.6334106728538,96.9059156563596,99.2145774223501,103.503754022167,100.801379215073,98.2505910165486,101.134969325153	1.26e-06
404993	108	95.8	12.1	-7.27	2.19	0.922	3.46	5.66	FALSE	inactive	Response Difference lower than 25%	3.9931	7.2685	95.8117	107.904	2.18921	50,50,25,25,12.5,12.5,6.25,6.25,3.125,3.125,1.5625,1.5625,0.78125,0.78125,0.390625,0.390625,0.1953125,0.1953125	92.2809829059831,96.1990324809957,103.195739014647,95.4525768731052,97.6495168451291,93.2791728212704,97.4549737872057,92.4330616996508,96.3719494295534,95.3817504655493,109.183315807922,106.032482598608,107.029207535318,102.357560928929,116.803718269574,107.388373094143,108.463356973995,104.263803680982	2.93e-05
405065	104	100	3.56	-3.23	1.39	-0.84	3.62	5.86	FALSE	inactive	Response Difference lower than 25%	2.92433	3.22666	100.002	103.567	1.39065	50,50,25,25,12.5,12.5,6.25,6.25,3.125,3.125,1.5625,1.5625,0.78125,0.78125,0.390625,0.390625,0.1953125,0.1953125	97.0886752136749,97.4429854872151,102.48557478917,105.760069294067,97.1271872551577,97.3658296405711,103.350772617551,99.8835855646101,101.415345740848,99.1061452513967,101.892744479495,99.8259860788861,102.997963536036,104.625955995127,105.791919914194,106.260330333452,99.7635933806146,101.564417177914	0.145
405165	110	73.3	36.9	-1.14	3.1	1.64	4.57	5.51	TRUE	active		3.13854	1.13959	71.6869	111.815	3.10346	50,50,25,25,12.5,12.5,6.25,6.25,3.125,3.125,1.5625,1.5625,0.78125,0.78125,0.390625,0.390625,0.1953125,0.1953125	71.2873931623931,69.3849343469247,77.3635153129162,79.6015591165007,80.6215722120658,77.9172821270312,86.0719354014277,81.2572759022118,90.0407314583035,88.5288640595903,101.542236242552,100.812064965197,108.847705361668,100.963366344316,111.583839828388,106.826444816397,111.205673758865,106.901840490798	1.32e-12
405412	94.1	44.4	49.7	-1.56	0.861	0.643	1.08	6.06	TRUE	active		2.31362	1.55618	44.3366	99.0863	0.86146	50,50,25,25,12.5,12.5,6.25,6.25,3.125,3.125,1.5625,1.5625,0.78125,0.78125,0.390625,0.390625,0.1953125,0.1953125	42.6549145299145,41.0504492052523,43.9857967154904,46.2537895192724,44.4241316270566,49.015263417036,45.62025774069,51.1757857974388,49.0211335423025,50.0931098696462,57.8689099193832,62.2389791183294,74.0940941816305,72.7864364432972,88.9882016446192,85.8312303466387,94.0425531914892,93.466257668712	0
405479	105	48	57	-1.08	42.6	-90.9	176	4.37	TRUE	active		6.20443	1.07691	-0.317106	105.314	42.6069	50,50,25,25,12.5,12.5,6.25,6.25,3.125,3.125,1.5625,1.5625,0.78125,0.78125,0.390625,0.390625,0.1953125,0.1953125	48.3707264957264,46.8555632342778,75.0554815801154,61.9315721091382,88.3520501436407,75.3569670113245,96.0822960241185,89.8719441210711,102.70187119191,94.6368715083799,111.496670171749,100.406032482599,107.324055744238,98.1678645972083,114.944583482302,97.6939590965891,104.397163120568,100.337423312884	5.44e-10
405662	97.6	98.8	1.2	-0.0887	0.657			6.18	FALSE	inactive	Response Difference lower than 25%	3.59614	0.0887473	102.757	92.8776	0.657182	50,50,25,25,12.5,12.5,6.25,6.25,3.125,3.125,1.5625,1.5625,0.78125,0.78125,0.390625,0.390625,0.1953125,0.1953125	99.2254273504271,99.1706979958539,102.396804260985,96.9250757903854,97.3883520501438,96.1841457410141,102.462428527565,92.7124563445865,99.0999354182977,96.4245810055866,103.224675779881,94.2575406032481,98.8689955011237,96.5110219093263,104.719342152306,95.5291328485243,96.5484633569739,95.1840490797549	0.967
405725	106	28.1	78.3	-0.9	42.9	-36.7	123	4.37	TRUE	active		4.15958	0.899633	-41.1863	107.571	42.8929	50,50,25,25,12.5,12.5,6.25,6.25,3.125,3.125,1.5625,1.5625,0.78125,0.78125,0.390625,0.390625,0.1953125,0.1953125	28.659188034188,26.2612301313062,55.1708832667554,50.064963187527,73.0477931574822,65.5588380108322,88.6553276404774,81.8626309662398,95.393387962184,91.1359404096834,107.360672975815,99.3619489559167,105.358498183433,98.605352796795,112.584912406149,103.437572168433,106.193853427896,102.116564417178	2.66e-15
405726	98.6	104	5.79	0.593	0.0145	-0.175	0.204	7.84	FALSE	inconclusive	IC50 lower than lowest measured concentration	4.26902	-0.592684	70.2304	104.62	0.0144964	50,50,25,25,12.5,12.5,6.25,6.25,3.125,3.125,1.5625,1.5625,0.78125,0.78125,0.390625,0.390625,0.1953125,0.1953125	101.201923076923,105.11402902557,103.728362183755,104.634040710264,101.201358056934,110.659773510586,106.096008436935,103.84167636787,105.223988709258,101.042830540037,106.379249912373,92.2853828306268,101.57094484422,100.084768996402,107.365033964963,100.516717261608,98.0614657210405,96.3496932515337	0.263
405738	106	96.4	9.63	-0.894	20.5	-74.9	116	4.69	FALSE	inactive	Response Difference lower than 25%	4.55316	0.893852	91.982	106.267	20.4598	50,50,25,25,12.5,12.5,6.25,6.25,3.125,3.125,1.5625,1.5625,0.78125,0.78125,0.390625,0.390625,0.1953125,0.1953125	93.2425213675213,96.6136834830685,106.569019085664,95.1927241229969,103.917471924784,96.4795667159037,105.533745643421,101.466821885914,100.901589533342,99.8510242085661,112.54819488258,104.408352668213,103.295143712996,101.744844674231,111.655345012513,109.174208231614,104.302600472813,102.300613496932	0.0263
405758	102	98	4.18	-1.07	17.7	-105	141	4.75	FALSE	inactive	Response Difference lower than 25%	4.22758	1.07251	96.5906	102.204	17.7164	50,50,25,25,12.5,12.5,6.25,6.25,3.125,3.125,1.5625,1.5625,0.78125,0.78125,0.390625,0.390625,0.1953125,0.1953125	95.0053418803415,96.0608154803038,105.237461162894,101.255954958857,100.156698876992,95.6917774495326,107.065633437458,95.2735739231662,101.879388524891,101.564245810056,105.327725201543,95.1276102088165,103.19771117337,103.141237692007,107.365033964963,102.117103508807,100.283687943262,98.5582822085892	0.469
405782	105	105	0.666	0.0887	1760000	1760000	1760000	-0.246	FALSE	inactive	IC50 larger than highest measured concentration	5.43774	-0.0886563	106.933	99.4117	1.7609e+06	50,50,25,25,12.5,12.5,6.25,6.25,3.125,3.125,1.5625,1.5625,0.78125,0.78125,0.390625,0.390625,0.1953125,0.1953125	99.8664529914528,104.215618521078,118.197958277852,100.563014291901,112.170279446331,99.679960610537,105.125425782089,103.608847497089,103.011131384496,102.383612662942,109.463722397476,101.972157772622,103.884038516825,99.4760616492388,110.439756882374,108.326362138844,104.728132387707,105.552147239264	0.998
405788	96.6	80.8	15.8	-2.02	108	-435	651	3.97	FALSE	inactive	IC50 larger than highest measured concentration	4.72525	2.01641	5.86234	96.6016	108.039	50,50,25,25,12.5,12.5,6.25,6.25,3.125,3.125,1.5625,1.5625,0.78125,0.78125,0.390625,0.390625,0.1953125,0.1953125	79.5673076923076,81.4098134070492,94.2299156679982,94.2399307059333,96.1869939932096,86.3860167405222,102.221458758916,89.6391152502907,97.6595423467631,97.4674115456238,102.523659305994,91.3573085846864,97.2494436980934,96.5112805485221,102.788702180908,99.6706851910898,92.8132387706854,93.0981595092023	0.00128
405803	104	91	12.8	-3.09	2.93	0.449	5.41	5.53	FALSE	inactive	Response Difference lower than 25%	5.23088	3.08585	90.9837	103.822	2.9319	50,50,25,25,12.5,12.5,6.25,6.25,3.125,3.125,1.5625,1.5625,0.78125,0.78125,0.390625,0.390625,0.1953125,0.1953125	88.7019230769232,87.7677954388391,98.5796715490458,93.3737548722391,93.4708801253589,83.0871491875926,98.9116857170047,86.8917345750872,99.0476295770467,93.8919925512104,106.940063091482,98.6078886310907,103.735084058339,99.5637403365931,112.727922774401,102.68056672846,102.74231678487,100.153374233129	0.000806
405828	98.4	98.7	0.353	0.0434	0.0381	-13.3	13.4	7.42	FALSE	inconclusive	IC50 lower than lowest measured concentration	3.01696	-0.043393	95.3179	101.249	0.0380748	50,50,25,25,12.5,12.5,6.25,6.25,3.125,3.125,1.5625,1.5625,0.78125,0.78125,0.390625,0.390625,0.1953125,0.1953125	95.5395299145297,101.036627505183,101.686640035508,102.035513209181,97.3361190911467,96.8734613490889,101.332276721399,93.1315483119907,95.8052011525583,97.4674115456238,101.472134595163,96.2296983758703,97.494227468179,101.483619086538,100.786557025385,100.892917568736,96.7375886524827,96.8404907975463	0.998
405835	105	105	0.659	-0.0902	0.0201	-1.96	2	7.7	FALSE	inconclusive	IC50 lower than lowest measured concentration	5.10353	0.090218	102.665	108.232	0.0201048	50,50,25,25,12.5,12.5,6.25,6.25,3.125,3.125,1.5625,1.5625,0.78125,0.78125,0.390625,0.390625,0.1953125,0.1953125	96.9818376068374,101.036627505183,116.866400355082,99.6102208748376,109.036301906503,101.698670605613,107.388722064176,105.704307334109,103.216999855892,104.469273743016,110.445145460918,103.30626450116,105.258952297772,106.717183212247,108.723632463354,102.493024735589,103.640661938534,100.337423312884	0.998
405836	102	97.1	4.63	-0.79	13.1	-149	175	4.88	FALSE	inactive	Response Difference lower than 25%	3.63956	0.79042	95.4572	102.002	13.0619	50,50,25,25,12.5,12.5,6.25,6.25,3.125,3.125,1.5625,1.5625,0.78125,0.78125,0.390625,0.390625,0.1953125,0.1953125	96.0202991452992,93.6420179682102,102.48557478917,102.035513209181,97.1271872551577,98.3013293943874,102.948198682148,92.8987194412103,100.438232977536,99.9255121042831,105.047318611987,98.0858468677494,100.296159940943,102.967820111267,104.862352520558,104.283743779125,96.5011820330969,101.380368098159	0.265
405850	109	98.2	10.5	-3.07	59.1	-238	356	4.23	FALSE	inactive	IC50 larger than highest measured concentration	4.59863	3.06852	80.6779	108.711	59.1453	50,50,25,25,12.5,12.5,6.25,6.25,3.125,3.125,1.5625,1.5625,0.78125,0.78125,0.390625,0.390625,0.1953125,0.1953125	96.1271367521367,100.207325501037,116.06746560142,98.6574274577739,111.909114651345,102.33874938454,109.164093469456,110.081490104773,107.94922978505,104.618249534451,113.529617946021,109.280742459396,106.586425103927,105.236603136259,112.155881301395,112.191904018687,108.321513002364,107.147239263804	0.0296
405858	104	102	1.59	-0.0898	0.0843			7.07	FALSE	inconclusive	IC50 lower than lowest measured concentration	2.5835	0.0898408	97.2351	110.397	0.0842955	50,50,25,25,12.5,12.5,6.25,6.25,3.125,3.125,1.5625,1.5625,0.78125,0.78125,0.390625,0.390625,0.1953125,0.1953125	102.430555555556,101.658604008293,102.929427430093,107.925508878302,98.6941760250714,101.994091580502,102.624391814689,98.905704307334,102.442095680041,100.96834264432,100.911321416053,103.538283062645,102.948117719204,105.321566112058,106.435466571327,105.033911750608,100.851063829787,104.141104294479	0.827
405885	111	108	2.53	-0.0499	0.38	-36.7	37.5	6.42	FALSE	inactive	Response Difference lower than 25%	6.66636	0.0499046	91.8651	128.613	0.379894	50,50,25,25,12.5,12.5,6.25,6.25,3.125,3.125,1.5625,1.5625,0.78125,0.78125,0.390625,0.390625,0.1953125,0.1953125	102.430555555556,100.552868002764,120.683533067022,103.594629709831,118.333768607991,105.145248645987,113.037565786363,108.265424912689,109.14181821509,105.288640595903,117.034700315457,110.440835266821,111.353113523484,103.225295430621,117.23274937433,102.01984400804,109.503546099291,109.723926380368	0.951
405907	98.2	98.9	0.635	-0.138	23.4			4.63	FALSE	inactive	Response Difference lower than 25%	3.7464	0.137553	100.486	97.0531	23.4287	50,50,25,25,12.5,12.5,6.25,6.25,3.125,3.125,1.5625,1.5625,0.78125,0.78125,0.390625,0.390625,0.1953125,0.1953125	99.9198717948715,98.894263994471,101.509098979139,100.043308791685,97.2838861321489,96.0856720827178,102.381267323817,91.9674039580907,99.8709509674675,94.2644320297951,100.701016473887,94.6055684454759,103.884402886831,98.605352796795,103.217733285663,100.330431130296,94.6099290780141,95.4907975460122	0.995
405921	104	108	3.94	0.0463	372			3.43	FALSE	inactive	IC50 larger than highest measured concentration	5.36082	-0.0462784	77.8033	140.108	372.161	50,50,25,25,12.5,12.5,6.25,6.25,3.125,3.125,1.5625,1.5625,0.78125,0.78125,0.390625,0.390625,0.1953125,0.1953125	105.422008547009,105.459571527298,118.908122503329,99.4369857080987,113.110472708279,100.664697193501,108.034540197241,103.748544819558,105.428789714506,101.638733705773,112.267788293025,104.176334106729,103.737488900379,101.91839157457,108.795137647479,102.867550560638,103.215130023641,100.705521472392	0.737
405929	94	37.6	56.3	0.525	294	-2060	2650	3.53	FALSE	inactive	IC50 larger than highest measured concentration	5.93257	-0.525045	98.4694	-116.538	293.757	50,50,25,25,12.5,12.5,6.25,6.25,3.125,3.125,1.5625,1.5625,0.78125,0.78125,0.390625,0.390625,0.1953125,0.1953125	40.7852564102564,29.5784381478922,59.6981802041722,57.2542226071893,68.0334290937581,54.5297882816347,76.2210242232675,65.2386495925491,82.4244367400501,76.9087523277468,90.6063792499125,83.9907192575406,92.0871223259341,85.7821507918239,100.572041473007,90.9162138006626,91.5366430260046,90.5828220858895	4.28e-10
405930	106	108	1.69	0.0503	5450	-749000	760000	2.26	FALSE	inactive	IC50 larger than highest measured concentration	5.27152	-0.0503151	96.916	121.972	5453.04	50,50,25,25,12.5,12.5,6.25,6.25,3.125,3.125,1.5625,1.5625,0.78125,0.78125,0.390625,0.390625,0.1953125,0.1953125	104.567307692308,105.321354526607,119.263204616067,101.429190125595,114.207364847218,103.175775480059,109.40805590786,105.704307334109,105.172140353499,104.841713221602,111.777076761304,106.902552204176,105.506942523911,102.705430647193,113.800500536289,108.234126084314,103.54609929078,102.60736196319	0.97
405931	101	95.9	4.68	-7.41	1.59	0.164	3.02	5.8	FALSE	inactive	Response Difference lower than 25%	4.53275	7.41476	95.8872	100.567	1.59329	50,50,25,25,12.5,12.5,6.25,6.25,3.125,3.125,1.5625,1.5625,0.78125,0.78125,0.390625,0.390625,0.1953125,0.1953125	94.7382478632477,95.3006219765036,101.686640035508,98.051104374188,101.253591015931,95.1009354997541,90.8360262373343,90.0582072176949,95.0847377502541,96.8715083798882,104.206098843323,92.4593967517403,103.047736478867,101.308003072634,107.22202359671,95.5285746878312,98.2505910165486,98.0674846625766	0.209
405935	106	79.2	26.7	-6.3	57.8	-815	931	4.24	FALSE	inactive	IC50 larger than highest measured concentration	5.37091	6.30288	12.3166	105.87	57.8455	50,50,25,25,12.5,12.5,6.25,6.25,3.125,3.125,1.5625,1.5625,0.78125,0.78125,0.390625,0.390625,0.1953125,0.1953125	75.5074786324783,82.8610919143055,113.404349755881,97.5313988739714,110.446591799425,97.1688823239785,102.785995981443,105.471478463329,104.350115171973,104.767225325885,113.038906414301,103.77030162413,104.966581804892,107.151955700279,113.872005720414,105.600305313899,106.950354609929,101.687116564418	1.22e-05
405946	99.9	89.7	10.2	-10.7	58.9	-700	818	4.23	FALSE	inactive	IC50 larger than highest measured concentration	4.05936	10.6545	31.6469	99.9407	58.8695	50,50,25,25,12.5,12.5,6.25,6.25,3.125,3.125,1.5625,1.5625,0.78125,0.78125,0.390625,0.390625,0.1953125,0.1953125	89.5032051282052,89.9792674498965,99.4673768308921,103.681247293201,97.7539827631233,93.7223042836044,105.692835967581,94.0628637951103,100.024589845194,100.595903165736,102.383456011217,96.9837587006964,99.3628626073662,100.526007464327,107.007508044333,104.28011573462,96.4066193853429,97.0858895705522	0.0141
405956	104	89.8	13.8	-4.22	99.5	-298	497	4	FALSE	inactive	IC50 larger than highest measured concentration	4.6339	4.2178	-161.498	103.59	99.5464	50,50,25,25,12.5,12.5,6.25,6.25,3.125,3.125,1.5625,1.5625,0.78125,0.78125,0.390625,0.390625,0.1953125,0.1953125	86.4049145299141,93.0200414651003,112.072791833111,96.7518406236465,108.566205275528,97.3658296405711,105.450788837821,102.025611175786,102.960579237631,102.607076350093,108.412197686646,100.46403712297,105.014168527687,101.484524323723,108.366106542725,102.212409447149,103.167848699764,98.9877300613495	0.00377
406005	97	99.3	2.37	0.0437	1.7	-332	336	5.77	FALSE	inactive	Response Difference lower than 25%	4.4915	-0.0437145	78.2992	117.466	1.70146	50,50,25,25,12.5,12.5,6.25,6.25,3.125,3.125,1.5625,1.5625,0.78125,0.78125,0.390625,0.390625,0.1953125,0.1953125	98.9049145299145,100.967519004838,104.260985352863,100.129926375054,94.5155393053018,96.2333825701623,99.2370487727361,93.2246798603026,98.0177534869924,95.6052141527002,104.135997195934,91.5893271461719,100.640343848688,98.6056114359907,104.361816231677,100.801100134726,93.9479905437352,91.3803680981594	0.883
406029	105	108	3.23	0.0544	38.8			4.41	FALSE	inactive	Response Difference lower than 25%	5.64262	-0.0544111	86.2349	129.297	38.7773	50,50,25,25,12.5,12.5,6.25,6.25,3.125,3.125,1.5625,1.5625,0.78125,0.78125,0.390625,0.390625,0.1953125,0.1953125	104.246794871795,105.459571527298,120.239680426098,101.862278042443,113.63280229825,101.058591826687,108.439149148077,103.701979045402,104.452591922178,104.543761638734,114.861549246408,103.248259860789,104.571531844299,103.052265808674,110.082230961744,105.130334010336,103.924349881797,100.828220858896	0.855
406044	98.3	85.3	13	-1.99	4.5	-0.506	9.5	5.35	FALSE	inactive	Response Difference lower than 25%	4.42977	1.98767	85.1425	98.2821	4.49598	50,50,25,25,12.5,12.5,6.25,6.25,3.125,3.125,1.5625,1.5625,0.78125,0.78125,0.390625,0.390625,0.1953125,0.1953125	84.4818376068377,45.0587422252937,93.6972924988904,79.9480294499784,88.9788456516063,81.2161496799608,95.9235648203292,85.5878928987194,93.2322264980173,93.6685288640595,100.420609884333,92.2273781902556,96.6593829102451,101.57142709349,100.929567393636,98.0736479080486,95.6028368794329,97.0858895705522	0.000541
406046	105	72.5	32.5	-1.12	78.6	-168	325	4.1	FALSE	inactive	IC50 larger than highest measured concentration	2.91758	1.11912	18.3788	105.149	78.6234	50,50,25,25,12.5,12.5,6.25,6.25,3.125,3.125,1.5625,1.5625,0.78125,0.78125,0.390625,0.390625,0.1953125,0.1953125	72.7297008547008,72.1492743607464,97.6031957390147,85.7514075357297,100.522329589971,93.1806991629741,100.768577446403,98.2072176949941,101.518889957202,100.595903165736,107.781282860147,102.784222737819,105.751799167998,100.177620467671,110.082230961744,103.436595387221,106.004728132388,104.325153374233	1.3e-10
406108	100	97.5	2.87	-7.11	1.18	0.252	2.11	5.93	FALSE	inactive	Response Difference lower than 25%	3.15242	7.11159	97.461	100.33	1.18191	50,50,25,25,12.5,12.5,6.25,6.25,3.125,3.125,1.5625,1.5625,0.78125,0.78125,0.390625,0.390625,0.1953125,0.1953125	95.5395299145297,99.6544574982722,98.3133599644917,101.862278042443,94.411073387307,96.4795667159037,99.6373482791251,96.577415599534,95.9080591406742,98.1378026070763,99.0185769365581,94.0835266821346,98.5259775773988,107.938348174913,99.1419377904897,97.6007462608466,98.2033096926716,100.889570552148	0.309
406109									FALSE	inconclusive	Fit did not converge						50,50,25,25,12.5,12.5,6.25,6.25,3.125,3.125,1.5625,1.5625,0.78125,0.78125,0.390625,0.390625,0.1953125,0.1953125	99.3322649572646,107.60193503801,114.91344873502,101.429190125595,109.663097414468,106.031511570655,103.675656846121,109.522700814901,100.179372436651,104.990689013035,109.183315807922,111.426914153132,100.686910335465,102.966526915288,105.434393993565,109.362587465525,106.004728132388,105.552147239264
406120	103	103	0.17	-0.102	0.00223	-0.141	0.145	8.65	FALSE	inconclusive	IC50 lower than lowest measured concentration	2.95365	0.101857	103.67	102.291	0.00223374	50,50,25,25,12.5,12.5,6.25,6.25,3.125,3.125,1.5625,1.5625,0.78125,0.78125,0.390625,0.390625,0.1953125,0.1953125	103.338675213675,105.183137525916,103.106968486463,108.358596795149,100.104465917994,102.732644017725,104.886012201713,100.023282887078,103.11200693548,100.148975791434,102.663862600771,99.767981438515,101.868343643183,103.402333960102,105.934930282445,108.990573363595,101.040189125295,103.343558282209	1
406126	109	93.7	15.6	-1.91	28	-35.4	91.5	4.55	FALSE	inactive	Response Difference lower than 25%	4.36378	1.90927	88.5173	109.328	28.0288	50,50,25,25,12.5,12.5,6.25,6.25,3.125,3.125,1.5625,1.5625,0.78125,0.78125,0.390625,0.390625,0.1953125,0.1953125	90.1976495726497,97.0283344851414,107.101642254771,93.5469900389779,109.715330373465,100.812407680945,107.063837835605,109.895227008149,107.795819650069,107.82122905028,112.197686645636,115.371229698376,109.287499959009,104.011687905255,112.656417590275,105.313968878355,110.023640661938,107.822085889571	0.000309
406190	98.3	97.4	0.895	0.138	0.0132	-0.24	0.266	7.88	FALSE	inconclusive	IC50 lower than lowest measured concentration	2.92914	-0.138307	101.507	96.1012	0.0132082	50,50,25,25,12.5,12.5,6.25,6.25,3.125,3.125,1.5625,1.5625,0.78125,0.78125,0.390625,0.390625,0.1953125,0.1953125	95.6463675213672,102.418797512094,95.6502441189525,102.035513209181,94.7767041002872,99.7291974396852,96.247371687788,93.6903376018627,95.3409296257694,98.4357541899441,98.3175604626707,94.7215777262183,98.6751506578884,98.3433512915148,101.930639971398,97.8789893663412,97.0685579196218,100.276073619632	0.973
406219	103	103	0.721	0.017	403000000000	403000000000	403000000000	-5.61	FALSE	inactive	IC50 larger than highest measured concentration	5.02043	-0.0169644	90.2672	122.388	4.03491e+11	50,50,25,25,12.5,12.5,6.25,6.25,3.125,3.125,1.5625,1.5625,0.78125,0.78125,0.390625,0.390625,0.1953125,0.1953125	103.979700854701,101.589495507947,113.58189081225,95.1927241229969,103.760773047793,95.8887247661252,105.931890427587,102.863795110593,104.14439919574,101.862197392924,109.323519102699,101.276102088167,104.718883074758,100.696967972708,107.436539149089,97.5059984831983,103.215130023641,99.1717791411047	0.997
406245	98.7	92.8	5.97	-0.646	9.59	-157	177	5.02	FALSE	inactive	Response Difference lower than 25%	3.94931	0.646107	90.4915	99.4133	9.58622	50,50,25,25,12.5,12.5,6.25,6.25,3.125,3.125,1.5625,1.5625,0.78125,0.78125,0.390625,0.390625,0.1953125,0.1953125	92.1207264957261,90.946786454734,97.1593430980915,94.6730186227804,94.9856359362755,93.3284096504185,100.524016474048,88.5681024447033,99.4078231544082,94.9348230912476,100.630914826499,91.1832946635729,98.7725103235133,95.9876654967554,104.075795495173,101.930677837323,95.6501182033099,95.9815950920248	0.153
406276	108	104	3.85	-0.134	4.2			5.38	FALSE	inactive	Response Difference lower than 25%	5.69803	0.134145	95.3476	116.309	4.19608	50,50,25,25,12.5,12.5,6.25,6.25,3.125,3.125,1.5625,1.5625,0.78125,0.78125,0.390625,0.390625,0.1953125,0.1953125	93.6164529914525,97.0974429854868,118.286728806036,102.815071459506,112.118046487334,104.209748892171,105.850729223839,106.216530849825,106.099234703019,106.480446927374,110.024535576586,109.570765661253,105.998987780123,104.710013733741,109.009653199857,105.032097728356,107.612293144208,103.834355828221	0.783
406482	101	26.9	73.6	-0.831	638	-2710	3980	3.2	FALSE	inactive	IC50 larger than highest measured concentration	3.72782	0.831306	-591.43	101.368	638.192	50,50,25,25,12.5,12.5,6.25,6.25,3.125,3.125,1.5625,1.5625,0.78125,0.78125,0.390625,0.390625,0.1953125,0.1953125	24.2254273504273,28.1271596406359,59.1655570350644,60.9787786920744,74.5625489683988,71.5164943377645,92.0475786608282,84.7962747380677,93.4380949694132,92.4767225325885,99.228881878724,91.4733178654296,96.1674105280342,97.2114168513782,107.508044333214,102.306040903411,99.9527186761233,97.3926380368095	2.33e-15
406727	107	79.4	27.5	-0.515	447	-1780	2670	3.35	FALSE	inactive	IC50 larger than highest measured concentration	4.18342	0.514825	-12.3421	109.097	446.613	50,50,25,25,12.5,12.5,6.25,6.25,3.125,3.125,1.5625,1.5625,0.78125,0.78125,0.390625,0.390625,0.1953125,0.1953125	74.0651709401706,76.5031098825156,95.2951620062139,94.0666955391944,92.8963175763904,89.9803052683408,97.3765658396325,94.8544819557626,97.6067027724381,95.2327746741154,103.434980722047,100.638051044083,102.752596773941,105.669177191127,110.296746514123,107.951417693275,105.910165484634,107.638036809816	1.43e-07
406745	102	88.9	13.6	-0.836	91.7	-802	986	4.04	FALSE	inactive	IC50 larger than highest measured concentration	3.88823	0.835927	66.0041	102.668	91.6651	50,50,25,25,12.5,12.5,6.25,6.25,3.125,3.125,1.5625,1.5625,0.78125,0.78125,0.390625,0.390625,0.1953125,0.1953125	92.4946581196581,84.3123704215619,96.4491788726143,93.6336076223473,95.7691303212323,94.0669620876415,105.531351507617,95.0873108265424,100.798274059734,99.5530726256983,103.645285664213,96.055684454756,102.803535700791,103.573553107679,108.223096174473,104.18871692113,98.0614657210405,100.030674846626	0.000507
406790	105	83.1	21.9	-1.03	200	-445	844	3.7	FALSE	inactive	IC50 larger than highest measured concentration	3.02246	1.02944	-8.24262	105.06	199.582	50,50,25,25,12.5,12.5,6.25,6.25,3.125,3.125,1.5625,1.5625,0.78125,0.78125,0.390625,0.390625,0.1953125,0.1953125	80.7425213675215,83.2066344160332,98.757212605415,94.4131658726721,101.253591015931,92.5898572131956,100.119646936793,101.233993015134,103.474640435465,101.042830540037,104.556607080267,104.756380510441,104.622470771149,104.186140042779,110.368251698248,105.316480601474,104.822695035461,103.282208588957	4.22e-08
406823	98.4	70.2	28.1	-1.06	34.6	-65.5	135	4.46	TRUE	active		3.09244	1.06393	51.0669	98.5489	34.6083	50,50,25,25,12.5,12.5,6.25,6.25,3.125,3.125,1.5625,1.5625,0.78125,0.78125,0.390625,0.390625,0.1953125,0.1953125	68.7232905982905,70.5597788527989,78.6063027075011,83.6725855348636,84.0167145468792,82.2993599212215,96.2462943266763,90.570430733411,96.3204823117042,96.3500931098696,98.8082719943921,92.5754060324826,97.10063498761,98.2556726041605,102.788702180908,99.3871395590112,95.3191489361701,95.9815950920248	5.49e-10
406869	107	97.8	9.12	-4.52	76.2	-199	351	4.12	FALSE	inactive	IC50 larger than highest measured concentration	3.04415	4.52238	36.4505	106.879	76.1892	50,50,25,25,12.5,12.5,6.25,6.25,3.125,3.125,1.5625,1.5625,0.78125,0.78125,0.390625,0.390625,0.1953125,0.1953125	96.9818376068374,98.4105044920527,111.806480248557,102.035513209181,109.924262209454,103.96356474643,106.418977356862,105.331781140861,107.284960850679,105.884543761639,111.706975113915,105.046403712297,106.635396432745,106.368408256798,111.512334644262,105.129357229123,105.531914893617,104.509202453988	0.00341
406958	101	99.3	1.84	-2.95	1.59	-3.23	6.4	5.8	FALSE	inactive	Response Difference lower than 25%	3.45879	2.94833	99.2931	101.136	1.58844	50,50,25,25,12.5,12.5,6.25,6.25,3.125,3.125,1.5625,1.5625,0.78125,0.78125,0.390625,0.390625,0.1953125,0.1953125	96.3942307692304,99.930891499655,100.798934753662,103.854482459939,95.1945677722645,98.1536189069423,104.965138390027,96.1583236321305,98.9438566179472,99.0316573556797,102.663862600771,96.9257540603252,98.4783908546044,106.455828304956,101.001072577762,103.434641824795,97.1158392434988,100.766871165644	0.761
407249	102	79.2	23.1	-0.843	581	-2460	3620	3.24	FALSE	inactive	IC50 larger than highest measured concentration	2.57916	0.843495	-105.072	102.543	580.65	50,50,25,25,12.5,12.5,6.25,6.25,3.125,3.125,1.5625,1.5625,0.78125,0.78125,0.390625,0.390625,0.1953125,0.1953125	78.8728632478631,78.2999308914997,94.052374611629,86.7042009527933,98.5374771480801,91.5066469719349,97.94134247574,97.0430733410941,97.658779870943,97.169459962756,103.575184016825,100.92807424594,102.262519115761,100.525490185936,103.575259206293,100.423085805346,105.106382978724,102.361963190184	1.55e-09
407341	101	42.1	58.8	-0.845	37.8	-25.2	101	4.42	TRUE	active		2.65256	0.844883	-5.25968	102.143	37.815	50,50,25,25,12.5,12.5,6.25,6.25,3.125,3.125,1.5625,1.5625,0.78125,0.78125,0.390625,0.390625,0.1953125,0.1953125	41.96047008547,41.8106427090532,56.6799822458944,60.1126028583802,69.3392530686863,73.8798621368786,83.5701831932863,81.1175785797439,90.0922748237344,91.3594040968343,96.2846126883981,92.7494199535961,94.7422136862474,105.410925954185,100.071505184126,100.989758448983,99.3380614657214,99.5398773006136	1.11e-16
500041	103	105	1.54	0.0789	530			3.28	FALSE	inactive	IC50 larger than highest measured concentration	5.76589	-0.0788711	97.9797	112.731	529.547	50,50,25,25,12.5,12.5,6.25,6.25,3.125,3.125,1.5625,1.5625,0.78125,0.78125,0.390625,0.390625,0.1953125,0.1953125	102.110042735042,98.7560469937801,115.357301375943,96.0588999566912,112.379211282319,102.437223042836,106.501694748882,104.353899883586,104.347065268693,98.3612662942272,109.744128987031,106.554524361949,104.275226155353,96.7750925281723,107.007508044333,105.131031711202,100.567375886525,99.2944785276077	0.982
500137	105	101	3.56	-0.565	0.0166	-0.107	0.14	7.78	FALSE	inconclusive	IC50 lower than lowest measured concentration	2.99127	0.56513	100.888	119.769	0.0166307	50,50,25,25,12.5,12.5,6.25,6.25,3.125,3.125,1.5625,1.5625,0.78125,0.78125,0.390625,0.390625,0.1953125,0.1953125	100.507478632478,102.487906012439,103.994673768309,105.067128627111,97.4928179681379,94.8547513540126,103.189168450797,100.58207217695,102.805110417936,102.309124767225,105.117420259377,101.044083526682,102.16173437208,104.098461355425,101.787629603146,102.022634811506,102.364066193853,108.619631901841	0.367
500167	113	112	0.895	-0.182	525	-32700	33700	3.28	FALSE	inactive	IC50 larger than highest measured concentration	4.41169	0.181786	109.181	113.6	524.925	50,50,25,25,12.5,12.5,6.25,6.25,3.125,3.125,1.5625,1.5625,0.78125,0.78125,0.390625,0.390625,0.1953125,0.1953125	110.924145299145,113.061506565308,117.576564580559,100.476396708532,116.401149125098,114.007877892664,112.555985369437,113.48079161816,110.781217475641,113.035381750466,113.179109709078,115.835266821346,109.632339732764,107.238082552458,117.590275294959,110.400905894805,112.009456264775,113.773006134969	0.992
500405	101	87.8	13.4	-3.31	2.38	1.42	3.34	5.62	FALSE	inactive	Response Difference lower than 25%	2.40346	3.30872	87.8279	101.218	2.3818	50,50,25,25,12.5,12.5,6.25,6.25,3.125,3.125,1.5625,1.5625,0.78125,0.78125,0.390625,0.390625,0.1953125,0.1953125	86.4049145299141,88.0442294402212,89.7913892587661,92.6808142052837,86.4194306607468,85.7459379615956,88.5742861435201,85.355064027939,95.3413108636791,89.1992551210428,98.0371538731161,98.4338747099764,99.5578005606196,101.573754846252,102.788702180908,100.519926685593,98.9125295508275,103.527607361963	1.36e-08
500417	106	84	21.7	-0.845	99.6	-256	455	4	FALSE	inactive	IC50 larger than highest measured concentration	2.68572	0.844648	44.641	106.037	99.6459	50,50,25,25,12.5,12.5,6.25,6.25,3.125,3.125,1.5625,1.5625,0.78125,0.78125,0.390625,0.390625,0.1953125,0.1953125	81.5438034188035,85.7636489288183,95.2951620062139,88.3499350368125,100.522329589971,95.7410142786807,97.5342196823101,102.44470314319,101.828150149788,100.670391061452,108.20189274448,102.494199535963,103.785585741181,104.623240283572,107.865570253843,103.058720598013,107.186761229315,106.104294478528	5.63e-09
500611	98.9	85.3	13.5	-3.33	3.49	1.25	5.72	5.46	FALSE	inactive	Response Difference lower than 25%	4.41185	3.32649	85.3389	98.8577	3.48551	50,50,25,25,12.5,12.5,6.25,6.25,3.125,3.125,1.5625,1.5625,0.78125,0.78125,0.390625,0.390625,0.1953125,0.1953125	80.0480769230771,83.4830684174154,91.5667998224589,88.7830229536595,87.3596239226948,81.4130969965534,91.3189234289532,82.3282887077999,94.0035470375143,93.1471135940409,102.874167542937,92.3433874709979,98.2309107464738,95.9887000535383,104.719342152306,102.305064122198,97.4468085106386,94.6932515337423	5.96e-05
500701	104	63.1	41.1	-2.14	86.8	-93.3	267	4.06	FALSE	inactive	IC50 larger than highest measured concentration	3.53744	2.13798	-70.5792	104.163	86.8498	50,50,25,25,12.5,12.5,6.25,6.25,3.125,3.125,1.5625,1.5625,0.78125,0.78125,0.390625,0.390625,0.1953125,0.1953125	59.6420940170939,66.0677263303387,98.4021304926764,90.0822867042009,102.246017236877,95.9871984244215,101.656083588858,102.398137369034,100.129125280114,102.979515828678,106.589554854539,101.740139211137,105.506651027906,102.617751959839,110.225241329997,107.480888229019,104.539007092199,104.570552147239	3.17e-11
500804	99.7	78	21.7	-1.98	188	-814	1190	3.73	FALSE	inactive	IC50 larger than highest measured concentration	4.18837	1.98334	-223.051	99.7116	188.308	50,50,25,25,12.5,12.5,6.25,6.25,3.125,3.125,1.5625,1.5625,0.78125,0.78125,0.390625,0.390625,0.1953125,0.1953125	74.4925213675213,80.8569454042848,96.8930315135376,95.5391944564746,96.0825280752155,93.1314623338259,103.834986583862,91.4086146682187,100.180363655217,98.1378026070763,104.135997195934,93.4454756380509,102.506938515841,102.006846179511,104.719342152306,99.8585062643073,98.9598108747046,99.723926380368	7.72e-06
500887	109	98.4	10.1	-2.88	4.21	0.34	8.09	5.38	FALSE	inactive	Response Difference lower than 25%	4.06508	2.87782	98.4331	108.517	4.21376	50,50,25,25,12.5,12.5,6.25,6.25,3.125,3.125,1.5625,1.5625,0.78125,0.78125,0.390625,0.390625,0.1953125,0.1953125	98.1570512820513,90.5321354526607,107.989347536618,102.468601126029,94.8811700182814,96.2333825701623,103.833310688799,99.7438882421416,103.83498650799,105.959031657356,109.113214160533,109.628770301624,104.622616519151,108.11318827123,111.083303539506,108.046165470924,107.659574468085,109.355828220859	0.000839
501426	102	95.6	6.74	-7.54	47	-66.2	160	4.33	FALSE	inactive	Response Difference lower than 25%	3.35033	7.54036	91.417	102.365	46.9805	50,50,25,25,12.5,12.5,6.25,6.25,3.125,3.125,1.5625,1.5625,0.78125,0.78125,0.390625,0.390625,0.1953125,0.1953125	95.6997863247859,95.50794747754,105.858854860186,102.20874837592,102.402716113868,99.0891186607585,104.88421659986,97.9743888242144,104.554992424803,102.979515828678,105.888538380652,97.0417633410675,102.803244204786,103.578855211192,107.57954951734,103.904194507838,97.9669030732858,98.9877300613495	0.0591
501444	103	90.9	12.4	-2.76	1.26	0.381	2.14	5.9	FALSE	inactive	Response Difference lower than 25%	3.5153	2.76022	90.9008	103.326	1.26116	50,50,25,25,12.5,12.5,6.25,6.25,3.125,3.125,1.5625,1.5625,0.78125,0.78125,0.390625,0.390625,0.1953125,0.1953125	84.6420940170939,91.3614374568072,97.8695073235686,92.2477262884365,92.0083572734394,86.0905957656326,95.1952687088246,88.6146682188592,92.2014354369787,90.7635009310986,98.7381703470035,92.4013921113691,100.934171821591,99.6512897043496,106.077940650697,101.551826266903,102.695035460993,102.484662576688	2.79e-05
501470	99.4	96.4	2.95	-2.15	2.64	-7.39	12.7	5.58	FALSE	inactive	Response Difference lower than 25%	3.68288	2.1536	96.4132	99.3793	2.63666	50,50,25,25,12.5,12.5,6.25,6.25,3.125,3.125,1.5625,1.5625,0.78125,0.78125,0.390625,0.390625,0.1953125,0.1953125	92.1207264957261,96.4063579820321,101.242787394585,97.8778692074491,96.9182554191694,94.8547513540126,100.284363480092,91.7345750873109,99.9741139459111,96.9459962756052,101.822642832107,94.3735498839905,98.1833968976811,98.3424460543298,103.289238469789,104.000337687219,98.5342789598107,93.7730061349694	0.484
501484	106	105	0.939	-0.0653	0.049	-10.7	10.8	7.31	FALSE	inconclusive	IC50 lower than lowest measured concentration	5.68919	0.0652646	101.08	111.683	0.0489679	50,50,25,25,12.5,12.5,6.25,6.25,3.125,3.125,1.5625,1.5625,0.78125,0.78125,0.390625,0.390625,0.1953125,0.1953125	101.469017094017,98.3413959917072,117.39902352419,99.090515374621,111.230086184382,101.79714426391,109.086164349044,105.797438882421,107.180349168177,102.309124767225,113.249211356467,104.002320185615,108.113208303409,103.226329987404,111.226313907759,103.154863777394,104.066193853428,101.257668711656	0.996
501486	99.4	87.8	11.6	-2.37	80.2	-228	388	4.1	FALSE	inactive	IC50 larger than highest measured concentration	3.03097	2.36816	52.2833	99.3774	80.1694	50,50,25,25,12.5,12.5,6.25,6.25,3.125,3.125,1.5625,1.5625,0.78125,0.78125,0.390625,0.390625,0.1953125,0.1953125	85.8173076923078,89.4263994471321,95.9165557035064,99.3503681247293,94.7767041002872,98.49827671098,98.992607507172,98.4400465657738,97.7093320178086,98.4357541899441,100.911321416053,94.7215777262183,98.9212461599957,105.93221325319,100.929567393636,103.812516614002,98.2033096926716,97.7607361963192	0.000312
501496	104	106	1.71	0.0642	35400			1.45	FALSE	inactive	IC50 larger than highest measured concentration	4.8123	-0.0641877	97.8304	118.821	35362.2	50,50,25,25,12.5,12.5,6.25,6.25,3.125,3.125,1.5625,1.5625,0.78125,0.78125,0.390625,0.390625,0.1953125,0.1953125	104.834401709402,101.24395300622,116.955170883267,98.3975747076657,111.909114651345,100.566223535204,107.06647138499,106.589057043073,106.923089826514,103.798882681564,108.6926042762,105.278422273782,104.180854323779,101.91955545095,108.366106542725,102.022913891852,102.74231678487,103.588957055215	0.96
501504	103	99.3	3.65	-0.89	4.84	-19.6	29.3	5.32	FALSE	inactive	Response Difference lower than 25%	1.66645	0.889593	98.8062	103.182	4.83864	50,50,25,25,12.5,12.5,6.25,6.25,3.125,3.125,1.5625,1.5625,0.78125,0.78125,0.390625,0.390625,0.1953125,0.1953125	96.4476495726492,100.967519004838,100.710164225477,100.996102208748,98.2763123530948,100.073855243722,101.577436227704,101.327124563446,101.518356224128,100.074487895717,102.523659305994,101.044083526682,100.540943711029,105.325962978386,104.576331784055,102.402184082792,101.465721040189,102.914110429448	0.0155
501545	106	92.2	14.2	-3.02	72.2	-435	580	4.14	FALSE	inactive	IC50 larger than highest measured concentration	3.73624	3.01707	49.0823	106.453	72.2344	50,50,25,25,12.5,12.5,6.25,6.25,3.125,3.125,1.5625,1.5625,0.78125,0.78125,0.390625,0.390625,0.1953125,0.1953125	91.8002136752136,92.6053904630271,110.563692853973,98.484192291035,110.603290676416,98.6952240275726,107.065274317088,107.287543655413,107.949687270543,107.374301675977,111.005958640028,105.162412993039,105.160062278121,102.790652262188,108.223096174473,106.163489453205,106.382978723405,105.245398773006	0.000338
501562	103	90.2	12.7	-1.55	80.6	-89.4	251	4.09	FALSE	inactive	IC50 larger than highest measured concentration	2.60879	1.54885	63.5985	102.862	80.5758	50,50,25,25,12.5,12.5,6.25,6.25,3.125,3.125,1.5625,1.5625,0.78125,0.78125,0.390625,0.390625,0.1953125,0.1953125	88.4882478632475,90.5321354526607,99.2898357745229,100.909484625379,99.5821363280231,96.2333825701623,102.301303187971,99.7904540162976,104.349123953407,100.670391061452,106.168944970207,99.9419953596285,105.111236697306,102.265226736051,106.506971755453,103.24779753279,101.843971631206,101.503067484662	1.41e-05
501580	113	109	4.06	-1.04	107	-542	756	3.97	FALSE	inactive	IC50 larger than highest measured concentration	1.63191	1.04235	100.306	113.375	106.89	50,50,25,25,12.5,12.5,6.25,6.25,3.125,3.125,1.5625,1.5625,0.78125,0.78125,0.390625,0.390625,0.1953125,0.1953125	109.268162393162,109.053213545266,116.688859298713,104.460805543525,114.990859232176,110.659773510586,111.264947637257,115.017462165309,111.14247851915,111.396648044692,112.968804766912,113.341067285382,112.434782323536,113.085009530854,115.016088666429,112.188136434009,114.231678486998,114.754601226994	0.0213
501632	102	69.3	32.9	-1.35	176	-327	678	3.75	FALSE	inactive	IC50 larger than highest measured concentration	2.78729	1.34814	-109.928	102.196	175.716	50,50,25,25,12.5,12.5,6.25,6.25,3.125,3.125,1.5625,1.5625,0.78125,0.78125,0.390625,0.390625,0.1953125,0.1953125	63.8621794871794,73.8078783690394,88.7261429205504,90.688609787787,94.7244711412901,95.2486459871985,101.090469005219,96.1117578579745,99.613767873386,102.905027932961,100.280406589555,100.174013921114,105.112256933324,101.308261711829,102.645691812657,105.313829338182,101.654846335697,102.484662576688	1.99e-11
501633	105	54.8	50.5	-4.22	53.2	-204	311	4.27	FALSE	inactive	IC50 larger than highest measured concentration	4.86627	4.22451	-10.9246	105.327	53.2151	50,50,25,25,12.5,12.5,6.25,6.25,3.125,3.125,1.5625,1.5625,0.78125,0.78125,0.390625,0.390625,0.1953125,0.1953125	52.8579059829059,56.7380787836904,109.143364403018,92.5941966219142,108.670671193523,99.3353028064993,103.994316321602,104.30733410943,109.856258058416,103.798882681564,111.146161934806,101.160092807425,106.783476403217,104.011946544451,111.154808723633,104.845951137217,104.444444444445,100.276073619632	2.03e-10
501686	97.8	79.3	18.5	-3	4.07	1.12	7.03	5.39	FALSE	inactive	Response Difference lower than 25%	5.64165	3.0027	79.2748	97.8212	4.07266	50,50,25,25,12.5,12.5,6.25,6.25,3.125,3.125,1.5625,1.5625,0.78125,0.78125,0.390625,0.390625,0.1953125,0.1953125	84.3750000000001,80.4422944022115,75.5881047492233,85.9246427024686,77.0174980412641,70.925652387986,92.6103202815026,77.3457508731083,93.8492219315493,90.0931098696462,100.911321416053,88.8631090487237,98.6249404710506,99.5678785637249,103.432248838041,99.387558179531,95.7446808510639,93.3435582822082	3.04e-05
501721									FALSE	inconclusive	Fit did not converge						50,50,25,25,12.5,12.5,6.25,6.25,3.125,3.125,1.5625,1.5625,0.78125,0.78125,0.390625,0.390625,0.1953125,0.1953125	106.22329059829,105.044920525225,115.712383488682,97.1849285404937,110.342125881431,104.702117183653,108.033343129339,108.684516880093,106.665296751777,104.022346368715,109.533824044865,104.640371229698,107.914991020101,105.058918008789,110.582767250626,107.011614626322,104.586288416076,104.20245398773
501747	101	102	1.48	0.0787	0.329	-33.7	34.4	6.48	FALSE	inactive	Response Difference lower than 25%	4.34517	-0.0787357	94.0302	107.769	0.32944	50,50,25,25,12.5,12.5,6.25,6.25,3.125,3.125,1.5625,1.5625,0.78125,0.78125,0.390625,0.390625,0.1953125,0.1953125	100.614316239316,106.9799585349,104.349755881048,99.9566912083153,101.984852441891,99.6307237813889,105.370106461234,94.3422584400466,102.444993088156,102.011173184357,104.90711531721,92.2273781902556,103.246973998192,103.058731788568,106.72148730783,102.964949601578,98.7234042553195,97.5153374233133	0.964
501753	107	108	1.3	0.0459	71600	71600	71600	1.15	FALSE	inactive	IC50 larger than highest measured concentration	4.4322	-0.0459085	98.8067	120.371	71615.2	50,50,25,25,12.5,12.5,6.25,6.25,3.125,3.125,1.5625,1.5625,0.78125,0.78125,0.390625,0.390625,0.1953125,0.1953125	105.742521367521,105.666897028335,119.618286728806,99.6102208748376,110.133194045443,104.160512063023,108.114743746667,107.566938300349,107.694105375683,106.554934823092,111.005958640028,104.582366589327,106.293325871036,105.496535527973,108.723632463354,108.518788037779,104.728132387707,104.509202453988	0.977
501792	103	98.4	4.48	-0.0946	1.58			5.8	FALSE	inactive	Response Difference lower than 25%	4.08052	0.0946096	83.9973	118.389	1.5825	50,50,25,25,12.5,12.5,6.25,6.25,3.125,3.125,1.5625,1.5625,0.78125,0.78125,0.390625,0.390625,0.1953125,0.1953125	95.5929487179485,96.1990324809957,103.462050599201,99.090515374621,98.6941760250714,98.1536189069423,103.351012031131,96.8568102444703,102.444154364755,101.564245810056,105.46792849632,94.8375870069606,102.217191487005,104.798856297477,108.795137647479,104.845811597044,98.0141843971635,97.2085889570551	0.439
501799	104	102	1.46	-0.0639	0.0575			7.24	FALSE	inconclusive	IC50 lower than lowest measured concentration	4.78594	0.0639149	95.7678	112.538	0.0574946	50,50,25,25,12.5,12.5,6.25,6.25,3.125,3.125,1.5625,1.5625,0.78125,0.78125,0.390625,0.390625,0.1953125,0.1953125	98.0502136752138,97.2356599861787,113.049267643142,99.1771329579904,109.715330373465,100.024618414574,104.885772788133,101.839348079162,103.83574898381,104.171322160149,106.028741675429,97.969837587007,99.5094850978134,102.18039307985,109.224168752235,103.625253701478,101.182033096927,103.895705521472	0.974
501829	97.8	98.9	1.12	-0.0155	94800000	-207000000	396000000	-1.98	FALSE	inactive	IC50 larger than highest measured concentration	3.72542	0.015503	128.43	75.2839	9.47941e+07	50,50,25,25,12.5,12.5,6.25,6.25,3.125,3.125,1.5625,1.5625,0.78125,0.78125,0.390625,0.390625,0.1953125,0.1953125	97.8899572649569,98.3413959917072,102.041722148247,97.5313988739714,101.044659179943,94.6085672082719,102.302619962664,93.4109429569263,99.8723234239432,98.8826815642458,102.17315106905,92.0533642691413,100.394394094582,98.0818670646262,103.432248838041,99.1997371063136,93.617021276596,95.0613496932519	0.975
501867	107	104	2.58	-0.0375	0.378	-39.9	40.6	6.42	FALSE	inactive	Response Difference lower than 25%	4.27995	0.0374949	81.7454	131.43	0.377539	50,50,25,25,12.5,12.5,6.25,6.25,3.125,3.125,1.5625,1.5625,0.78125,0.78125,0.390625,0.390625,0.1953125,0.1953125	99.1720085470083,100.414651002073,115.446071904128,100.649631875271,107.834943849569,100.369276218612,109.164811710197,107.240977881257,106.411011065812,105.586592178771,109.884332281809,103.654292343387,106.884261146898,104.975506868164,106.936002860207,104.753715082688,104.302600472813,107.208588957055	0.835
501880	101	94.7	6.22	-0.448	30.2	-246	306	4.52	FALSE	inactive	Response Difference lower than 25%	2.63703	0.448302	88.6796	102.157	30.1864	50,50,25,25,12.5,12.5,6.25,6.25,3.125,3.125,1.5625,1.5625,0.78125,0.78125,0.390625,0.390625,0.1953125,0.1953125	91.3728632478629,94.8168624740844,97.7807367953839,98.9172802078822,95.0901018542697,97.2673559822748,98.4272323371135,96.7636786961584,94.4153602278886,101.489757914339,100.630914826499,97.7378190255224,96.2168919748601,103.929182001816,99.2134429746155,102.871597225662,100.283687943262,100.828220858896	0.0154
501883	103	105	2.27	0.121	1180			2.93	FALSE	inactive	IC50 larger than highest measured concentration	3.52339	-0.120916	98.5968	114.035	1178.67	50,50,25,25,12.5,12.5,6.25,6.25,3.125,3.125,1.5625,1.5625,0.78125,0.78125,0.390625,0.390625,0.1953125,0.1953125	102.270299145299,104.906703524534,113.936972924989,98.3975747076657,103.917471924784,103.175775480059,103.108605781,107.380675203725,99.8718659384511,104.171322160149,105.678233438486,104.582366589327,101.871841595241,102.706335884378,103.432248838041,101.554617070368,103.782505910166,101.625766871165	0.806
501967	99.4	98.8	0.514	0.146	3.77			5.42	FALSE	inactive	Response Difference lower than 25%	2.01811	-0.146284	100.37	97.8029	3.77175	50,50,25,25,12.5,12.5,6.25,6.25,3.125,3.125,1.5625,1.5625,0.78125,0.78125,0.390625,0.390625,0.1953125,0.1953125	99.3322649572646,95.9917069799583,100.177541056369,98.7440450411434,99.9999999999996,98.8429345150171,102.220740518175,97.0896391152501,99.4069844310064,98.659217877095,100.911321416053,96.3457076566127,98.9208089159884,101.048070680919,100.214515552377,98.9168891751013,95.7919621749409,101.257668711656	0.984
501976	109	99.2	9.41	-4	45.8	-218	309	4.34	FALSE	inactive	Response Difference lower than 25%	3.56508	4.00307	92.5081	108.565	45.8357	50,50,25,25,12.5,12.5,6.25,6.25,3.125,3.125,1.5625,1.5625,0.78125,0.78125,0.390625,0.390625,0.1953125,0.1953125	98.5844017094013,99.7235659986176,113.670661340435,100.476396708532,112.379211282319,109.625800098474,106.905106631816,115.203725261932,105.892680003386,107.523277467412,109.393620750088,108.062645011601,106.340038105815,105.585507411306,109.724705041115,108.516415854834,107.4231678487,107.515337423313	0.0104
501984	103	102	1.17	-0.0298	3800000000	3800000000	3800000000	-3.58	FALSE	inactive	IC50 larger than highest measured concentration	1.51482	0.0298475	82.6206	113.646	3.80414e+09	50,50,25,25,12.5,12.5,6.25,6.25,3.125,3.125,1.5625,1.5625,0.78125,0.78125,0.390625,0.390625,0.1953125,0.1953125	101.095085470085,102.418797512094,103.195739014647,104.893893460372,101.828153564899,101.107828655835,104.805090411546,102.211874272409,104.296208131499,99.7765363128491,101.822642832107,102.37819025522,103.045696006833,102.267166530019,104.64783696818,103.998802745313,103.167848699764,103.834355828221	0.712
502003	110	112	1.41	0.177	0.718			6.14	FALSE	inactive	Response Difference lower than 25%	2.79958	-0.176543	107.599	113.562	0.718018	50,50,25,25,12.5,12.5,6.25,6.25,3.125,3.125,1.5625,1.5625,0.78125,0.78125,0.390625,0.390625,0.1953125,0.1953125	114.663461538462,110.711817553559,115.179760319574,105.586834127328,113.058239749282,111.201378631216,110.539165368347,113.620488940628,108.311710789871,110.353817504655,110.655450403084,112.238979118329,108.651091306387,106.189688572544,112.084376117269,110.586773405597,110.96926713948,112.60736196319	0.895
502026	99.2	72.5	26.7	-0.882	190	-1640	2020	3.72	FALSE	inactive	IC50 larger than highest measured concentration	3.23053	0.881821	-15.087	99.4944	190.414	50,50,25,25,12.5,12.5,6.25,6.25,3.125,3.125,1.5625,1.5625,0.78125,0.78125,0.390625,0.390625,0.1953125,0.1953125	75.0801282051283,69.3849343469247,83.9325343985796,85.1450844521437,90.2846696265345,85.6967011324474,98.2694587876455,90.0582072176949,98.4300241628589,97.8398510242086,101.261829652997,91.7053364269142,99.6086666134689,99.5639989757888,101.859134787272,98.9152146930221,96.595744680851,98.3128834355825	4.81e-09
502045	104	104	0.9	0.042	5270000	5270000	5270000	-0.722	FALSE	inactive	IC50 larger than highest measured concentration	3.88945	-0.0419973	97.968	114.892	5.27313e+06	50,50,25,25,12.5,12.5,6.25,6.25,3.125,3.125,1.5625,1.5625,0.78125,0.78125,0.390625,0.390625,0.1953125,0.1953125	101.469017094017,101.036627505183,114.292055037728,98.1377219575573,107.417080177592,103.471196454948,106.74230539716,104.353899883586,103.834376527334,101.489757914339,107.220469681038,102.088167053364,104.523143507491,101.91839157457,104.147300679299,104.845113896178,103.829787234043,100.460122699386	0.988
502890	95.9	55.7	40.3	-1.86	343	-1300	1990	3.46	FALSE	inactive	IC50 larger than highest measured concentration	4.19604	1.86378	-1404.42	95.9237	343.315	50,50,25,25,12.5,12.5,6.25,6.25,3.125,3.125,1.5625,1.5625,0.78125,0.78125,0.390625,0.390625,0.1953125,0.1953125	55.6356837606837,54.4574982722876,90.4127829560586,87.3105240363794,87.6207887176809,84.6134908911867,96.2441396044529,88.4284051222348,97.1957283054656,95.4562383612663,99.6494917630568,92.9234338747096,97.4949562081908,99.388770920678,100.85806220951,96.2826497841662,95.839243498818,95.1226993865034	7.58e-10
503039	103	102	1.23	-0.0838	0.0565	-4.38	4.49	7.25	FALSE	inconclusive	IC50 lower than lowest measured concentration	4.35797	0.0838428	97.9868	108.93	0.0565296	50,50,25,25,12.5,12.5,6.25,6.25,3.125,3.125,1.5625,1.5625,0.78125,0.78125,0.390625,0.390625,0.1953125,0.1953125	99.2254273504271,96.9592259847959,111.806480248557,95.5391944564746,105.954557325673,99.0398818316104,104.398685858857,105.145518044237,104.401353547076,101.191806331471,105.95864002804,101.334106728538,104.867983281247,101.833557918368,106.220951018948,102.022913891852,101.843971631206,98.1901840490795	0.979
503202	101	91.4	9.97	-2.64	5.16	0.964	9.35	5.29	FALSE	inactive	Response Difference lower than 25%	3.18939	2.64002	91.4213	101.416	5.15805	50,50,25,25,12.5,12.5,6.25,6.25,3.125,3.125,1.5625,1.5625,0.78125,0.78125,0.390625,0.390625,0.1953125,0.1953125	91.2126068376066,89.288182446441,92.9871282734132,95.4525768731052,91.694959519457,88.8478581979319,99.9585215971998,92.0605355064026,98.6882747230876,99.5530726256983,102.73396424816,96.9257540603252,102.165305198139,102.441360028347,106.649982123704,103.246402131058,97.8723404255318,98.1901840490795	8.14e-05
503217	105	87.4	17.5	-1.13	58.3	-105	221	4.23	FALSE	inactive	IC50 larger than highest measured concentration	2.73728	1.13136	66.4641	104.949	58.3119	50,50,25,25,12.5,12.5,6.25,6.25,3.125,3.125,1.5625,1.5625,0.78125,0.78125,0.390625,0.390625,0.1953125,0.1953125	82.3985042735042,91.2923289564618,95.9165557035064,95.9722823733218,97.8062157221204,97.2673559822748,101.252911119504,104.074505238649,102.187428756165,103.724394785848,108.131791097091,103.016241299304,100.493211240232,105.319109039699,107.150518412585,106.91798317006,103.262411347518,104.325153374233	1.98e-07
503244	99.6	86.6	13	-3.3	2.09	0.899	3.28	5.68	FALSE	inactive	Response Difference lower than 25%	3.2594	3.30174	86.6382	99.6372	2.09175	50,50,25,25,12.5,12.5,6.25,6.25,3.125,3.125,1.5625,1.5625,0.78125,0.78125,0.390625,0.390625,0.1953125,0.1953125	90.5715811965809,86.1782999308916,88.2822902796272,92.5075790385448,85.0613737268214,81.2653865091089,84.3744931165603,83.7252619324796,90.5559363698676,90.9124767225326,96.0743077462322,94.0835266821346,96.807171384712,104.100789108186,100.429031104755,100.892917568736,97.7304964539007,97.8834355828221	2.12e-06
503445	100	70.7	29.6	-0.825	375	-2450	3200	3.43	FALSE	inactive	IC50 larger than highest measured concentration	3.58459	0.824707	-87.3366	100.663	375.308	50,50,25,25,12.5,12.5,6.25,6.25,3.125,3.125,1.5625,1.5625,0.78125,0.78125,0.390625,0.390625,0.1953125,0.1953125	69.4177350427349,70.3524533517623,87.9272081668886,82.6331745344305,89.8145729955602,84.1703594288527,93.9042309766459,96.2980209545983,97.5046072601424,96.4245810055866,102.804065895549,94.2575406032481,98.5773537482563,98.9542570718422,107.293528780837,101.268559715171,97.9196217494088,96.7177914110433	5.09e-09
503447	96.9	84.9	12	-2.04	5.05	0.0926	10	5.3	FALSE	inactive	Response Difference lower than 25%	3.83795	2.03895	84.8187	96.9293	5.04877	50,50,25,25,12.5,12.5,6.25,6.25,3.125,3.125,1.5625,1.5625,0.78125,0.78125,0.390625,0.390625,0.1953125,0.1953125	84.0544871794869,80.2349689011749,87.8384376387039,91.2083152880034,86.2104988247585,83.1363860167408,92.2091828275821,87.5436554132711,94.8796317546775,92.8491620111731,99.228881878724,91.0672853828306,96.8565070835353,96.9494153460981,102.93171254916,99.8597621258666,93.3806146572103,91.993865030675	0.000134
503479	104	68.6	35.1	-0.574	505	-1360	2370	3.3	FALSE	inactive	IC50 larger than highest measured concentration	3.07937	0.57438	-70.966	105.599	505.094	50,50,25,25,12.5,12.5,6.25,6.25,3.125,3.125,1.5625,1.5625,0.78125,0.78125,0.390625,0.390625,0.1953125,0.1953125	68.29594017094,64.5473393227368,84.7314691522414,83.0662624512776,87.8297205536692,83.2840965041852,90.5148529192596,92.3399301513389,96.4748836652517,92.2532588454376,101.682439537329,99.0719257540601,100.001311732022,100.614591388867,104.504826599929,103.904892208705,101.182033096927,107.024539877301	2.35e-11
504161	86.7	4.66	82.1	-1.26	1.52	1.3	1.73	5.82	TRUE	active		2.03564	1.26271	3.59597	92.9755	1.51581	50,50,25,25,12.5,12.5,6.25,6.25,3.125,3.125,1.5625,1.5625,0.78125,0.78125,0.390625,0.390625,0.1953125,0.1953125	4.19337606837606,4.00829302004147,6.52463382157124,6.66955391944565,9.58474797597282,9.62580009847368,15.4221849003052,18.5331781140861,28.0228544502282,27.0763500931098,46.7928496319664,51.1020881670534,62.1544906963585,68.6870051908887,77.1183410797283,80.9411845146688,85.9574468085109,88.0061349693251	0
504162	102	53.2	48.5	-1.56	17.9	9.46	26.3	4.75	TRUE	active		2.52629	1.56053	43.4629	101.807	17.8904	50,50,25,25,12.5,12.5,6.25,6.25,3.125,3.125,1.5625,1.5625,0.78125,0.78125,0.390625,0.390625,0.1953125,0.1953125	53.2852564102563,52.9371112646856,65.9121171770972,80.2944997834561,81.0916688430402,79.0989660265882,95.4377946657458,89.5925494761348,98.1725360784496,99.1061452513967,103.014370837715,99.7099767981438,99.855345107586,96.508306197771,106.363961387201,99.2937871830955,102.458628841608,102.730061349693	7.66e-15
504166	96.7	8.97	87.8	-1.6	2.86	2.55	3.17	5.54	TRUE	active		2.60993	1.60421	8.06721	97.9449	2.85992	50,50,25,25,12.5,12.5,6.25,6.25,3.125,3.125,1.5625,1.5625,0.78125,0.78125,0.390625,0.390625,0.1953125,0.1953125	9.96260683760679,5.11402902557015,9.89791389258766,14.9848419229103,18.4643510054844,14.4017725258494,26.2405663567657,26.3096623981373,49.1243727683285,52.9981378026071,71.9593410445146,73.8979118329466,84.1732972898527,90.6661640444963,96.1387200572041,93.9288861414979,98.5815602836878,94.5705521472393	0
504167	105	24.3	80.5	-1.02	16.7	-4.95	38.4	4.78	TRUE	active		6.63872	1.02251	-2.33632	105.942	16.7471	50,50,25,25,12.5,12.5,6.25,6.25,3.125,3.125,1.5625,1.5625,0.78125,0.78125,0.390625,0.390625,0.1953125,0.1953125	35.71047008547,10.9191430545957,34.8424323124723,52.0571676050238,62.9668320710367,53.6927621861153,78.4813278355996,71.571594877765,94.8799367450061,89.2737430167598,99.8597967052227,93.7354988399068,102.60393381146,100.696580013915,106.292456203075,102.306040903411,102.033096926714,105.122699386503	2.57e-12
504173	95	2.96	92.1	-1.24	1.64	1.38	1.89	5.79	TRUE	active		2.6437	1.23717	1.51791	101.781	1.63691	50,50,25,25,12.5,12.5,6.25,6.25,3.125,3.125,1.5625,1.5625,0.78125,0.78125,0.390625,0.390625,0.1953125,0.1953125	2.80448717948718,1.58949550794748,4.92676431424767,5.19705500216544,9.42804909898145,8.34564254062042,20.3472813690148,18.2537834691501,31.1105002832597,32.1415270018622,50.1577287066246,54.814385150812,68.1967656332043,78.0215524041807,86.8430461208438,91.1048721149197,92.0094562647754,95.6134969325152	0
504174	111	42.8	67.9	-0.831	8.36	2.94	13.8	5.08	TRUE	active		3.1995	0.830959	26.644	114.442	8.35823	50,50,25,25,12.5,12.5,6.25,6.25,3.125,3.125,1.5625,1.5625,0.78125,0.78125,0.390625,0.390625,0.1953125,0.1953125	46.020299145299,38.2170006910851,47.5366178428762,58.8133391078389,63.3324627840166,63.096996553422,75.7341767075725,73.6670547147846,90.6070984973888,84.4320297951583,96.4248159831754,99.4779582366591,105.701297485155,101.306451237459,109.152663568108,107.199993860232,111.536643026005,109.294478527608	1.11e-16
504181	101	70.8	30.2	-1.12	57.9	-63.5	179	4.24	FALSE	inactive	IC50 larger than highest measured concentration	1.5763	1.12401	35.0271	101.172	57.8845	50,50,25,25,12.5,12.5,6.25,6.25,3.125,3.125,1.5625,1.5625,0.78125,0.78125,0.390625,0.390625,0.1953125,0.1953125	72.0352564102563,69.6613683483069,84.0213049267643,80.9874404504115,92.7918516583963,89.7341211226,97.2144828457177,95.5995343422584,99.7168546042486,97.9143389199255,100.210304942166,97.3317865429234,100.491753760207,101.571297773892,103.503754022167,102.118638450713,99.6690307328605,99.9079754601224	2.66e-15
504243	99.8	47.4	52.5	-1.32	11.3	6.01	16.6	4.95	TRUE	active		3.69048	1.32249	39.9918	100.128	11.293	50,50,25,25,12.5,12.5,6.25,6.25,3.125,3.125,1.5625,1.5625,0.78125,0.78125,0.390625,0.390625,0.1953125,0.1953125	44.684829059829,52.1769177608846,57.2126054150023,48.6790818536162,73.3611909114654,67.6267848350564,81.7908614639303,79.7206053550636,93.3343982578949,85.8472998137803,97.476340694006,95.7656612529002,101.622685385083,96.250184280427,102.359671076153,96.1880415466912,102.174940898345,97.3312883435581	7.83e-14
504245	96.4	4.06	92.4	-0.872	70.8	-54.5	196	4.15	FALSE	inactive	IC50 larger than highest measured concentration	4.18031	0.87184	-122.705	97.699	70.7718	50,50,25,25,12.5,12.5,6.25,6.25,3.125,3.125,1.5625,1.5625,0.78125,0.78125,0.390625,0.390625,0.1953125,0.1953125	4.19337606837606,0.552868002764341,39.4584997780736,38.198354265916,57.6390702533298,50.9354997538159,78.2399989465802,69.0570430733413,87.4685955271643,81.6014897579143,92.9898352611287,86.716937354988,95.3796425748864,93.7190117913609,101.501608866643,93.0827145308066,95.886524822695,92.4233128834353	2.22e-16
504253	104	107	2.55	0.121	91.8	-2980	3160	4.04	FALSE	inactive	IC50 larger than highest measured concentration	3.43318	-0.12119	98.8328	114.769	91.7556	50,50,25,25,12.5,12.5,6.25,6.25,3.125,3.125,1.5625,1.5625,0.78125,0.78125,0.390625,0.390625,0.1953125,0.1953125	105.36858974359,108.638562543193,114.469596094097,98.9172802078822,108.252807521546,101.994091580502,105.290621152549,106.682188591385,103.215169913924,103.426443202979,105.187521906765,105.104408352668,104.966800426896,103.575492901647,106.435466571327,105.036423473727,104.539007092199,102.668711656442	0.732
504258	101	101	0.143	-0.188	3.19	-2080	2090	5.5	FALSE	inactive	Response Difference lower than 25%	3.0152	0.187574	101.047	100.483	3.18535	50,50,25,25,12.5,12.5,6.25,6.25,3.125,3.125,1.5625,1.5625,0.78125,0.78125,0.390625,0.390625,0.1953125,0.1953125	102.056623931624,100.483759502419,103.106968486463,98.8306626245127,102.71611386785,98.5967503692763,103.432173234879,95.6926658905704,101.774929337553,100.744878957169,104.346302138101,95.8236658932713,99.8041146847305,100.699683684264,105.434393993565,102.963833280192,98.6288416075654,98.6196319018406	1
504261	105	53.1	51.4	-0.781	427	-889	1740	3.37	FALSE	inactive	IC50 larger than highest measured concentration	2.27309	0.780593	-225.56	105.39	427.067	50,50,25,25,12.5,12.5,6.25,6.25,3.125,3.125,1.5625,1.5625,0.78125,0.78125,0.390625,0.390625,0.1953125,0.1953125	55.3685897435897,49.4816862474084,75.5881047492233,74.8375920311823,83.3899190389136,82.6932545544067,94.3894025972783,96.0651920838179,96.0112221191185,99.5530726256983,101.822642832107,98.6078886310907,101.4259984558,103.576398138832,105.791919914194,105.128240907737,104.444444444445,104.815950920245	2.22e-16
504266	98.5	52.7	45.8	-1.21	8.8	4.63	13	5.06	TRUE	active		2.64713	1.20662	47.0318	99.0063	8.80497	50,50,25,25,12.5,12.5,6.25,6.25,3.125,3.125,1.5625,1.5625,0.78125,0.78125,0.390625,0.390625,0.1953125,0.1953125	52.3237179487179,39.8064961990325,57.3013759431868,61.6717193590298,68.3468268477408,62.9492860659774,82.7621623595167,78.0908032596041,87.7253973833354,85.8472998137803,93.9712583245707,90.3132250580045,94.9875804483428,97.819994878944,101.930639971398,98.2603526598799,96.643026004728,97.3926380368095	4.27e-14
504267	100	64.8	35.7	-1.07	7.63	3.84	11.4	5.12	TRUE	active		2.10426	1.06673	59.8579	101.311	7.63181	50,50,25,25,12.5,12.5,6.25,6.25,3.125,3.125,1.5625,1.5625,0.78125,0.78125,0.390625,0.390625,0.1953125,0.1953125	62.7938034188033,64.6855563234278,69.8180204172215,73.0186227804245,75.9728388613212,70.3348104382082,84.217078687463,83.0733410942957,89.4758893708582,89.3482309124767,96.7052225727309,93.6194895591645,97.6427446826577,97.2077959026379,100.85806220951,101.648108986457,99.3380614657214,99.2944785276077	3.89e-15
504269	97.2	69.3	27.9	-0.663	97.1	-845	1040	4.01	FALSE	inactive	IC50 larger than highest measured concentration	3.30333	0.663285	24.0335	98.3858	97.0908	50,50,25,25,12.5,12.5,6.25,6.25,3.125,3.125,1.5625,1.5625,0.78125,0.78125,0.390625,0.390625,0.1953125,0.1953125	68.0822649572648,69.3158258465792,75.1442521083,82.1134690342139,81.1439018020373,82.9886755292963,91.48232319756,83.1199068684516,93.1289872719911,89.6461824953445,98.3876621100593,90.0812064965199,94.8409579578956,96.1641867478449,101.001072577762,98.2579804769344,95.130023640662,93.7730061349694	2.44e-09
504582	103	17.2	85.5	-0.905	735	-1600	3070	3.13	FALSE	inactive	IC50 larger than highest measured concentration	2.51243	0.905115	-964.447	103.307	735.213	50,50,25,25,12.5,12.5,6.25,6.25,3.125,3.125,1.5625,1.5625,0.78125,0.78125,0.390625,0.390625,0.1953125,0.1953125	20.6997863247863,12.7159640635798,56.5024411895251,57.0809874404504,78.5844868111778,74.3722304283608,89.4629893538767,90.8963911525026,93.1812931132421,94.6368715083799,101.121626358219,95.30162412993,101.819955306375,99.9162655603807,105.362888809439,102.400649140886,103.404255319149,102.730061349693	0
504591	99.5	33.1	66.5	-0.508	257	-1240	1750	3.59	FALSE	inactive	IC50 larger than highest measured concentration	4.66404	0.508029	-133.544	105.614	257.028	50,50,25,25,12.5,12.5,6.25,6.25,3.125,3.125,1.5625,1.5625,0.78125,0.78125,0.390625,0.390625,0.1953125,0.1953125	37.0459401709401,24.9481686247408,54.5494895694629,56.7345171069727,61.9744058500913,58.0748399803053,71.0528032636859,69.848661233993,83.6601813015002,85.9217877094972,89.2043463021382,89.5591647331786,90.0236221074944,97.908966762277,96.1387200572041,102.872574006875,96.9739952718678,97.3926380368095	4.72e-13
504596	101	40.6	60.1	-0.671	58.3	-132	249	4.23	FALSE	inactive	IC50 larger than highest measured concentration	2.72512	0.670887	-29.2074	103.562	58.3037	50,50,25,25,12.5,12.5,6.25,6.25,3.125,3.125,1.5625,1.5625,0.78125,0.78125,0.390625,0.390625,0.1953125,0.1953125	37.5801282051281,42.8472702142364,53.4842432312472,60.5456907752274,69.1303212326978,64.4756277695717,78.4796519405369,81.3504074505237,85.7697994002367,88.1564245810056,92.7094286715739,96.8097447795821,93.7586332918318,96.0767666996863,96.7822667143371,100.611046418736,102.269503546099,100.337423312884	2.22e-16
504597	97	34.4	62.6	-0.744	218	-446	883	3.66	FALSE	inactive	IC50 larger than highest measured concentration	3.645	0.74448	-157.288	98.3645	218.392	50,50,25,25,12.5,12.5,6.25,6.25,3.125,3.125,1.5625,1.5625,0.78125,0.78125,0.390625,0.390625,0.1953125,0.1953125	30.4220085470085,8.43123704215619,60.9409675987573,62.0181896925075,66.779838077827,66.1496799606106,82.9226891651589,83.1664726426076,87.8796462417186,85.5493482309125,92.2187171398529,90.5452436194892,92.4796216964849,96.1635401498556,100.143010368252,98.353425955449,94.373522458629,96.656441717791	1.07e-12
504600	102	52.3	50.1	-0.875	682	-1550	2920	3.17	FALSE	inactive	IC50 larger than highest measured concentration	2.78047	0.874786	-444.481	102.81	681.702	50,50,25,25,12.5,12.5,6.25,6.25,3.125,3.125,1.5625,1.5625,0.78125,0.78125,0.390625,0.390625,0.1953125,0.1953125	51.6826923076922,50.3800967519005,79.2276964047936,75.4439151147683,87.3596239226948,84.8104382077793,88.0924663130129,95.6926658905704,96.784448848166,97.8398510242086,98.247458815282,100.986078886311,97.7887841810951,103.054205602642,101.787629603146,102.870341364103,105.390070921986,104.141104294479	1.21e-14
504606	104	46.4	57.4	-1.07	218	-183	619	3.66	FALSE	inactive	IC50 larger than highest measured concentration	3.15728	1.07001	-231.395	104.038	217.624	50,50,25,25,12.5,12.5,6.25,6.25,3.125,3.125,1.5625,1.5625,0.78125,0.78125,0.390625,0.390625,0.1953125,0.1953125	47.1420940170939,42.6399447131998,76.8308921438082,80.4677349501948,84.0167145468792,88.3062530773022,96.4885808700171,94.5750873108263,100.951836689879,95.5307262569832,102.874167542937,102.37819025522,102.113200287269,102.790781581786,106.220951018948,106.163908073725,103.87706855792,105.79754601227	1.03e-14
504607	109	70.2	38.3	-1.35	1.87	1.21	2.52	5.73	TRUE	active		2.85915	1.34869	69.768	110.346	1.86701	50,50,25,25,12.5,12.5,6.25,6.25,3.125,3.125,1.5625,1.5625,0.78125,0.78125,0.390625,0.390625,0.1953125,0.1953125	64.9839743589742,66.7588113337942,75.4105636928539,74.0580337808575,77.0174980412641,72.8951255539142,75.8937458588932,75.1105937136203,80.9805362797431,81.2290502793296,92.91973361374,95.6496519721578,100.63990660468,101.222005540052,104.290311047551,105.790498570062,109.645390070922,108.067484662576	9.63e-14
504608	104	99.4	4.73	-2.33	3.67	0.0578	7.29	5.44	FALSE	inactive	Response Difference lower than 25%	1.73697	2.3287	99.3896	104.132	3.67262	50,50,25,25,12.5,12.5,6.25,6.25,3.125,3.125,1.5625,1.5625,0.78125,0.78125,0.390625,0.390625,0.1953125,0.1953125	98.9049145299145,97.9267449896335,101.686640035508,101.255954958857,99.2687385740399,97.2673559822748,102.625469175801,99.0454016298018,102.649412855495,101.862197392924,104.696810375044,101.566125290023,103.491684894276,105.49550097119,105.791919914194,105.129496769296,103.735224586289,101.503067484662	0.000423
504610	103	35.5	67.8	-0.774	237	-856	1330	3.63	FALSE	inactive	IC50 larger than highest measured concentration	3.24212	0.773668	-194.797	104.501	237.28	50,50,25,25,12.5,12.5,6.25,6.25,3.125,3.125,1.5625,1.5625,0.78125,0.78125,0.390625,0.390625,0.1953125,0.1953125	37.4732905982905,32.9647546648238,63.2490013315579,56.8211346903421,81.6139984330109,73.4859675036927,89.8659224096498,84.8428405122236,94.0041570181707,91.0614525139664,101.892744479495,96.1716937354991,102.555035356644,98.1673473188168,105.791919914194,104.377654315733,104.208037825059,99.4785276073621	6.66e-16
504617	98.9	50.4	48.5	-0.78	432	-1410	2270	3.36	FALSE	inactive	IC50 larger than highest measured concentration	2.97424	0.780108	-214.649	99.7021	431.74	50,50,25,25,12.5,12.5,6.25,6.25,3.125,3.125,1.5625,1.5625,0.78125,0.78125,0.390625,0.390625,0.1953125,0.1953125	53.7660256410256,45.9571527297858,68.3976919662672,71.6327414465137,84.2256463828675,79.5420974889215,89.78332472442,84.3771827706635,92.9740521853697,90.8379888268156,99.1587802313353,92.5174013921114,97.347969347738,98.2576123981285,102.145155523775,99.6706851910898,99.0543735224586,95.7361963190181	5.91e-14
504619	104	58.8	45.4	-0.824	305			3.52	FALSE	inactive	IC50 larger than highest measured concentration	2.59003	0.823734	-145.322	104.772	304.977	50,50,25,25,12.5,12.5,6.25,6.25,3.125,3.125,1.5625,1.5625,0.78125,0.78125,0.390625,0.390625,0.1953125,0.1953125	63.7553418803418,53.3517622667589,87.2170439414115,76.9164140320485,90.3369025855316,86.1398325947808,94.3047698966152,96.2980209545983,99.7658055518915,96.6480446927374,103.014370837715,99.767981438515,102.06590506048,102.006458220718,106.292456203075,104.563661366698,103.309692671395,104.509202453988	1.01e-13
504682	99.4	92.4	7.08	-0.764	99.4	-661	860	4	FALSE	inactive	IC50 larger than highest measured concentration	2.93015	0.763876	80.1044	99.5961	99.4253	50,50,25,25,12.5,12.5,6.25,6.25,3.125,3.125,1.5625,1.5625,0.78125,0.78125,0.390625,0.390625,0.1953125,0.1953125	91.0523504273504,92.3289564616449,95.9165557035064,96.4919878735383,95.7691303212323,94.6085672082719,101.331319067077,95.5529685681025,98.5330346461383,95.0837988826815,103.29477742727,92.9234338747096,100.589623543841,99.477742804011,103.432248838041,99.2929499420559,98.8652482269505,96.8404907975463	0.0141
504721	102	17.6	84.6	-1.14	11.2	6.26	16.2	4.95	TRUE	active		1.68165	1.14126	2.08092	103.201	11.2216	50,50,25,25,12.5,12.5,6.25,6.25,3.125,3.125,1.5625,1.5625,0.78125,0.78125,0.390625,0.390625,0.1953125,0.1953125	34.642094017094,8.84588804422945,31.4691522414559,45.4742312689476,50.3786889527291,47.1442639094043,69.6796466734381,70.3608847497091,83.2971665636053,83.2402234636872,92.7795303189626,96.3457076566127,97.398689652584,96.1600485207132,103.146228101537,101.365121515071,102.458628841608,101.809815950921	0
504729	102	72.4	29.2	-1.23	11.7	3.79	19.5	4.93	TRUE	active		2.39919	1.22726	67.4195	101.82	11.6542	50,50,25,25,12.5,12.5,6.25,6.25,3.125,3.125,1.5625,1.5625,0.78125,0.78125,0.390625,0.390625,0.1953125,0.1953125	74.4925213675213,69.799585348998,77.1859742565468,78.1290601992204,84.591277095847,81.7577548005911,92.5304758524471,90.6635622817229,95.8570495083172,95.903165735568,99.5092884682795,96.2296983758703,98.2317852344889,105.671634263486,103.360743653914,103.245843970364,98.1560283687946,100.644171779141	1.3e-12
