# Supplementary material for: 7,8-Dihydroxyflavone is a direct inhibitor of human and murine pyridoxal phosphatase
Source: eLife. 2024 Jun 10;13:RP93094. doi: 10.7554/eLife.93094 (PMC11164532; doi:10.7554/eLife.93094)
Supplement: Figure 2—figure supplement 1—source data 2. [file elife-93094-fig2-figsupp1-data2.xlsx]

## Sheet: to Fig 2 - Fig Suppl 1_b
IC50 data_PGP_PDXP screen
Comp_ID	Response.lowestdose.predicted	Response.highestdose.predicted	Response.difference	HillCoefficient	IC50.relative	IC50.relative.lower	IC50.relative.higher	pIC50	FitIsValid	Activity.call	Problem	RSE	b	c	d	e	Dose	Response	p.value
101699	119	84.2	35.2	-7.08	66.5	-173	306	4.18	FALSE	inactive	IC50 larger than highest measured concentration	10.5604	7.078	-180.067	119.316	66.4855	50,50,25,25,12.5,6.25,6.25,3.125,3.125,1.5625,1.5625,0.78125,0.78125,0.390625,0.390625,0.1953125,0.1953125	70.721503365474,97.5083056478402,126.189649858996,116.028119507909,125.396266290948,124.732759303892,121.652329363474,113.172966781214,116.845070422535,112.091503267974,127.899745968654,118.813716404078,114.520592737426,116.655379048556,131.541161413541,96.0535871526696,127.576576013266	0.00137
101801	101	93.6	7.04	-0.481	452			3.34	FALSE	inactive	IC50 larger than highest measured concentration	6.11204	0.481322	71.2763	101.372	452.471	50,50,25,25,12.5,6.25,6.25,3.125,3.125,1.5625,1.5625,0.78125,0.78125,0.390625,0.390625,0.1953125,0.1953125	130.334158210647,94.518272425249,100.456092657499,94.7275922671355,86.7911236350827,93.907483205676,100.072780626597,101.718213058419,96.4507042253522,113.071895424837,97.9463364695129,98.0537534754403,101.295706987576,98.6381248718299,103.074986838609,91.9413876309878,103.461900732988	0.508
101961	100	80.7	19.8	-3.43	78.6	-1370	1530	4.1	FALSE	inactive	IC50 larger than highest measured concentration	14.5915	3.42727	-12.6727	100.463	78.592	50,50,25,25,12.5,6.25,6.25,3.125,3.125,1.5625,1.5625,0.78125,0.78125,0.390625,0.390625,0.1953125,0.1953125	72.5500357314576,88.704318936877,107.40197983909,89.1036906854131,104.121169425854,106.094614627961,107.217690990469,64.1466208476518,105.239436619718,84.967320261438,114.206763539365,102.502316960148,98.9095941307066,104.694147400783,115.555504680617,85.8557944769421,112.336996259874	0.292
101967	93.1	76.2	16.9	-0.474	283	-2980	3550	3.55	FALSE	inactive	IC50 larger than highest measured concentration	6.47502	0.474135	33.585	94.9458	282.869	50,50,25,25,12.5,6.25,6.25,3.125,3.125,1.5625,1.5625,0.78125,0.78125,0.390625,0.390625,0.1953125,0.1953125	64.9668043918447,78.405315614618,93.2259298136832,86.5729349736383,78.7601268052129,80.6442796738566,86.1386368690575,80.8705612829325,91.8309859154929,86.6013071895425,91.8704264827053,92.3076923076923,95.9105263099556,91.6726428265281,97.6028073102357,89.2275835970412,93.1907627349444	0.00897
104803	96.5	104	6.96	0.799	0.0155	-0.406	0.437	7.81	FALSE	inconclusive	IC50 lower than lowest measured concentration	7.97343	-0.799006	43.1398	103.598	0.0155111	50,50,25,25,12.5,6.25,6.25,3.125,3.125,1.5625,1.5625,0.78125,0.78125,0.390625,0.390625,0.1953125,0.1953125	97.9093802622065,106.810631229236,106.718636987626,100.281195079086,106.93906305037,101.971963618902,105.14579014501,100.801832760596,106.366197183099,88.2352941176471,111.724858646541,99.1658943466172,97.81955403924,96.9721856841489,109.345887357687,82.7310138621356,108.038878501416	0.636
104828	83.5	83.5	0.000544	-1.15	783000			0.106	FALSE	inactive	IC50 larger than highest measured concentration	7.0304	1.15174	46.5398	83.5048	783174	50,50,25,25,12.5,6.25,6.25,3.125,3.125,1.5625,1.5625,0.78125,0.78125,0.390625,0.390625,0.1953125,0.1953125	80.3922510563205,85.2990033222589,15.7416490784138,89.4551845342707,82.8460725607606,86.7380202044686,89.4254304153772,88.4306987399772,50.4788732394367,87.2549019607843,66.2821598424557,84.708063021316,74.9154997799789,82.8922791953567,80.634160113297,88.9811367178437,84.3157035085012	1
104876	97.8	99.5	1.61	-0.0416	78.6	-13500	13600	4.1	FALSE	inactive	IC50 larger than highest measured concentration	8.08529	0.0416135	113.654	85.5151	78.6172	50,50,25,25,12.5,6.25,6.25,3.125,3.125,1.5625,1.5625,0.78125,0.78125,0.390625,0.390625,0.1953125,0.1953125	98.6948346468877,100.747508305648,43.7520221592081,102.319859402461,98.6967241986614,98.7459616702486,101.643977716858,106.987399770905,87.0985915492956,86.9281045751633,101.45552531395,99.7219647822057,91.3434465360284,101.362859871299,106.456239699075,85.5265746090181,109.545219871335	0.993
105412	101	83.8	16.9	0.0232	215000	-33600000	34000000	0.668	FALSE	inactive	IC50 larger than highest measured concentration	14.6843	-0.0232176	325.547	-209.839	214665	50,50,25,25,12.5,6.25,6.25,3.125,3.125,1.5625,1.5625,0.78125,0.78125,0.390625,0.390625,0.1953125,0.1953125	84.8385962659883,88.3720930232558,771.662424780306,90.579964850615,84.6072560760831,88.8885910483105,89.2830992091498,79.725085910653,506.929577464789,95.7516339869282,288.879262343506,85.2641334569045,188.277230773664,85.7691077710267,132.463608478555,87.1714972082503,110.830400786848	0.432
105479	86	125	39.1	6.71	74.4	-217	366	4.13	FALSE	inactive	IC50 larger than highest measured concentration	24.9693	-6.71117	85.9544	690.455	74.4477	50,50,25,25,12.5,6.25,6.25,3.125,3.125,1.5625,1.5625,0.78125,0.78125,0.390625,0.390625,0.1953125,0.1953125	148.891729644866,101.744186046512,36.5786996360274,100.351493848858,102.007749207467,104.839294288764,103.216057841543,109.049255441008,46.6478873239437,92.156862745098,63.629008493034,97.4976830398517,67.0760163912804,101.969806298565,84.9990632568551,86.9247026557561,92.6323530065705	0.18
105938	87.7	93.3	5.67	-1.07	54.6	-1280	1390	4.26	FALSE	inactive	IC50 larger than highest measured concentration	3.89472	1.07419	99.6005	87.6425	54.6394	50,50,25,25,12.5,6.25,6.25,3.125,3.125,1.5625,1.5625,0.78125,0.78125,0.390625,0.390625,0.1953125,0.1953125	100.000722706459,86.7109634551496,50.2426128180848,91.3532513181019,88.4114124691792,90.3236840755777,88.9966939655982,90.950744558992,73.1267605633803,107.18954248366,81.5148577310377,89.8980537534754,86.0945125567093,87.4336190811708,87.9497941664395,88.4877080774537,89.2274802709356	0.228
106937	94.3	98.5	4.16	-0.0827	2.02			5.69	FALSE	inactive	Response Difference lower than 25%	18.7882	0.0826909	114.321	77.8203	2.0185	50,50,25,25,12.5,6.25,6.25,3.125,3.125,1.5625,1.5625,0.78125,0.78125,0.390625,0.390625,0.1953125,0.1953125	104.967841688174,107.142857142857,57.4726830880883,99.4376098418278,104.614300810144,103.943694145179,103.716738358992,138.831615120274,82.4788732394369,88.5620915032679,81.0014801103391,103.429101019462,80.6412528666451,98.9412780439459,96.5579338145483,85.6092406213459,100.391663639361	0.99
203639	92.8	84.2	8.56	-0.0723	2.74	-168	173	5.56	FALSE	inactive	Response Difference lower than 25%	10.1581	0.0723161	45.8858	131.577	2.74075	50,50,25,25,12.5,6.25,6.25,3.125,3.125,1.5625,1.5625,0.78125,0.78125,0.390625,0.390625,0.1953125,0.1953125	100.002083095088,73.255813953488,88.5006476926763,78.4885764499124,71.5744980626982,91.3991151803901,85.5676621640431,83.3906071019473,95.098591549296,113.398692810457,90.244336470069,88.9712696941612,89.5031407014287,87.2831503311324,89.6102988560537,89.8030631354651,91.0142244196897	0.663
203640	102	32.1	69.4	-0.897	218	-2630	3070	3.66	FALSE	inactive	IC50 larger than highest measured concentration	10.5526	0.896785	-230.317	102.148	218.046	50,50,25,25,12.5,6.25,6.25,3.125,3.125,1.5625,1.5625,0.78125,0.78125,0.390625,0.390625,0.1953125,0.1953125	19.2151492877728,43.687707641196,102.904281177772,64.7803163444641,73.4061289186334,89.4259860983555,90.0690463205,95.53264604811,96.3380281690144,81.3725490196078,108.729520479312,107.692307692308,94.4110810729926,101.665717620477,110.636933352875,83.8820531712818,111.499563169533	6.15e-07
203646	91.3	76.3	15	-0.574	337	-3780	4460	3.47	FALSE	inactive	IC50 larger than highest measured concentration	5.33456	0.574259	28.7645	92.1332	336.944	50,50,25,25,12.5,6.25,6.25,3.125,3.125,1.5625,1.5625,0.78125,0.78125,0.390625,0.390625,0.1953125,0.1953125	69.9359639565033,77.7408637873756,94.1939371373826,80.2460456942004,76.0126805213102,82.9760800346839,83.6381854758035,91.8671248568157,90.1408450704224,85.6209150326797,91.442199033796,88.9712696941612,91.2072663427868,91.5221248393331,93.2377442105375,87.7475918609681,93.1356405108961	0.00478
203647	110	69.9	39.7	-1.23	71.2	-645	787	4.15	FALSE	inactive	IC50 larger than highest measured concentration	11.9497	1.23402	8.34318	109.699	71.2324	50,50,25,25,12.5,6.25,6.25,3.125,3.125,1.5625,1.5625,0.78125,0.78125,0.390625,0.390625,0.1953125,0.1953125	75.4268325603917,64.285714285714,100.684213045298,73.9191564147629,101.655512504403,105.19808211387,110.148110434144,105.61282932417,101.521126760564,86.2745098039215,116.517922858953,119.740500463392,102.181997745478,114.081752882159,122.687629052114,92.5170811222093,121.771318275123	0.00103
203717	104	94.8	9.19	-1.82	37	-100	174	4.43	FALSE	inactive	Response Difference lower than 25%	4.64999	1.81629	89.4971	104.004	36.9565	50,50,25,25,12.5,6.25,6.25,3.125,3.125,1.5625,1.5625,0.78125,0.78125,0.390625,0.390625,0.1953125,0.1953125	95.8186329879788,93.1063122923589,98.1795359848757,102.601054481547,98.4853821768227,104.841800034498,106.147220893152,109.50744558992,98.4788732394363,93.7908496732026,101.797739958611,107.506950880445,105.454290518485,106.056982653503,108.055321230918,99.178608464374,107.760926002543	0.0526
203793	111	88.3	22.5	-1.71	82.8	-580	746	4.08	FALSE	inactive	IC50 larger than highest measured concentration	6.66795	1.71083	34.9537	110.781	82.7604	50,50,25,25,12.5,6.25,6.25,3.125,3.125,1.5625,1.5625,0.78125,0.78125,0.390625,0.390625,0.1953125,0.1953125	90.3281044812477,85.9634551495014,112.867519191246,92.8295254833043,105.24832687566,110.217090817549,109.575602037765,109.278350515464,113.014084507042,108.496732026144,116.774458621608,114.735866543095,105.590470711726,108.177134609216,120.781711654664,98.3563611175559,113.230241282698	0.00114
203830	93.7	82.2	11.5	-10.5	2.79	0.766	4.81	5.55	FALSE	inactive	Response Difference lower than 25%	4.92035	10.4814	82.1667	93.6896	2.78943	50,50,25,25,12.5,6.25,6.25,3.125,3.125,1.5625,1.5625,0.78125,0.78125,0.390625,0.390625,0.1953125,0.1953125	70.4582681657583,83.6378737541527,86.1662879317722,82.2144112478031,84.04367735118,80.1081666332565,88.568306082039,81.3287514318442,88.338028169014,99.3464052287581,90.7579645324494,91.3809082483781,94.069666266528,92.2791461193864,97.2951916584475,88.9810029973449,95.3679000075232	0.000894
203862	96.7	90.1	6.58	-8.04	88.4	-370	547	4.05	FALSE	inactive	IC50 larger than highest measured concentration	5.62696	8.0404	-550.451	96.6651	88.3657	50,50,25,25,12.5,6.25,6.25,3.125,3.125,1.5625,1.5625,0.78125,0.78125,0.390625,0.390625,0.1953125,0.1953125	85.8822694173158,94.2691029900329,98.4063603393053,98.5237258347981,95.1743571680168,95.1622208133065,98.6429852326436,60.4810996563574,100.056338028169,89.2156862745099,99.9146967805168,98.7951807228916,93.0475943457399,94.8523783885316,104.673008661025,84.8688034756632,101.95445219953	0.406
204383	90.9	62.1	28.8	-0.735	115	-796	1030	3.94	FALSE	inactive	IC50 larger than highest measured concentration	3.23111	0.735457	7.57365	91.702	114.874	50,50,25,25,12.5,6.25,6.25,3.125,3.125,1.5625,1.5625,0.78125,0.78125,0.390625,0.390625,0.1953125,0.1953125	56.601009493387,67.0265780730896,67.8341921560172,76.3796133567664,74.9559704121167,84.4095414135667,84.4234819302108,83.848797250859,84.8450704225352,91.1764705882352,86.3933503837743,89.8980537534754,90.3889437555629,91.8248841141978,91.5776394112735,88.5695182785891,90.6227604327702	2.33e-09
204384	88.5	94.2	5.69	-13.6	4.88	-2.73	12.5	5.31	FALSE	inactive	Response Difference lower than 25%	7.35832	13.5574	94.2243	88.5361	4.87633	50,50,25,25,12.5,6.25,6.25,3.125,3.125,1.5625,1.5625,0.78125,0.78125,0.390625,0.390625,0.1953125,0.1953125	89.542820145145,96.2624584717609,46.7690767548915,92.1265377855888,97.4991194082425,92.4734390952275,97.1419661412069,76.9759450171822,79.098591549296,85.2941176470587,95.6359563018224,94.7173308619092,87.253141532742,88.796158910953,100.676584480535,80.5104512598811,96.3163035548389	0.444
204455	86.2	81.8	4.32	-0.0292	1.51	-911	914	5.82	FALSE	inactive	Response Difference lower than 25%	4.13937	0.0292429	31.2353	137.915	1.50864	50,50,25,25,12.5,6.25,6.25,3.125,3.125,1.5625,1.5625,0.78125,0.78125,0.390625,0.390625,0.1953125,0.1953125	77.5163044702795,81.3953488372092,82.8073212184455,83.9718804920915,84.1141246917928,83.3330613919357,82.4232695371946,80.4123711340207,86.3098591549293,96.078431372549,85.2806936455436,81.0009267840593,84.1173171415681,83.6494481868788,89.0565506937998,82.6486687790051,85.0967438592582	0.493
204914	94	75	19.1	-0.954	109	-793	1010	3.96	FALSE	inactive	IC50 larger than highest measured concentration	9.43333	0.953511	34.7246	94.1636	108.691	50,50,25,25,12.5,6.25,6.25,3.125,3.125,1.5625,1.5625,0.78125,0.78125,0.390625,0.390625,0.1953125,0.1953125	72.0259460121271,75.1661129568103,97.2104362901932,75.4657293497363,85.241282141599,83.6922571291378,88.4961296368891,80.8705612829325,110.760563380282,82.6797385620916,98.6308770662482,95.2734012974977,91.3432691892035,93.1873254696674,102.582661834125,84.376016693667,100.056174936921	0.0495
205084	85.7	80	5.71	-7.22	54.4	-485	594	4.26	FALSE	inactive	IC50 larger than highest measured concentration	3.31232	7.22001	69.5587	85.7096	54.3679	50,50,25,25,12.5,6.25,6.25,3.125,3.125,1.5625,1.5625,0.78125,0.78125,0.390625,0.390625,0.1953125,0.1953125	75.9490517453573,84.0531561461791,83.2055737581385,88.6115992970124,83.6914406481156,82.9752059373352,85.7097842305387,84.306987399771,87.2112676056335,93.4640522875816,83.740894705691,86.1909175162187,86.8442684277205,82.1354056267732,86.5969851066839,85.5264943767189,85.3199371385214	0.125
205085	86.7	72.2	14.5	-0.0552	2.82	-120	126	5.55	FALSE	inactive	Response Difference lower than 25%	17.88	0.055186	-15.0001	174.437	2.81906	50,50,25,25,12.5,6.25,6.25,3.125,3.125,1.5625,1.5625,0.78125,0.78125,0.390625,0.390625,0.1953125,0.1953125	106.018741904093,64.3687707641197,38.3434342162622,76.8014059753954,77.8443113772454,85.6635214701616,81.8512491335223,94.3871706758304,54.5352112676056,90.1960784313725,67.223236201846,94.1612604263207,69.1893033262506,94.5504069081706,85.9824736057374,81.4152308985282,91.7949199162293	0.687
205653	85.8	77	8.83	-11.8	3.69	-0.857	8.24	5.43	FALSE	inactive	Response Difference lower than 25%	4.79006	11.8095	76.9795	85.8109	3.69131	50,50,25,25,12.5,6.25,6.25,3.125,3.125,1.5625,1.5625,0.78125,0.78125,0.390625,0.390625,0.1953125,0.1953125	79.8698618227762,71.9269102990031,90.4926694964014,72.4428822495606,72.1380767876012,75.0907895779623,76.9212447160266,84.306987399771,85.1830985915495,90.1960784313725,85.5374520230263,83.4105653382762,85.4814245827084,83.6494481868788,87.5812552198187,84.950800885497,85.6548631840805	0.00727
206501	95.3	65.2	30.1	-1.06	38.7	-370	448	4.41	TRUE	active		10.399	1.06023	42.181	95.4683	38.681	50,50,25,25,12.5,6.25,6.25,3.125,3.125,1.5625,1.5625,0.78125,0.78125,0.390625,0.390625,0.1953125,0.1953125	58.4319225394715,68.770764119601,89.0682917937665,70.755711775044,79.464600211342,75.0901485732398,77.7065411704343,110.882016036655,100.732394366197,90.8496732026145,101.026769154824,99.3512511584801,89.5710645354013,91.220005647502,100.676004639528,80.6748739851452,97.9352852021512	0.00296
206528	91	71.2	19.7	-2.23	50.6	-89.2	190	4.3	FALSE	inactive	IC50 larger than highest measured concentration	6.89684	2.23444	50.9812	90.9775	50.5956	50,50,25,25,12.5,6.25,6.25,3.125,3.125,1.5625,1.5625,0.78125,0.78125,0.390625,0.390625,0.1953125,0.1953125	65.2298695429817,76.4119601328901,89.0126919622139,83.7609841827768,80.3099682986966,91.9367433230615,85.6382352045838,107.445589919817,98.7042253521127,125.16339869281,88.0190229936075,86.7469879518072,89.639121379492,90.3099060481202,89.0569105951149,89.063107383578,88.557555578929	0.00565
206533	99.6	94.3	5.28	0.0162	0.117	-21.9	22.1	6.93	FALSE	inconclusive	IC50 lower than lowest measured concentration	10.2192	-0.0161593	218.021	-17.8356	0.116939	50,50,25,25,12.5,6.25,6.25,3.125,3.125,1.5625,1.5625,0.78125,0.78125,0.390625,0.390625,0.1953125,0.1953125	77.7764787955799,90.3654485049832,93.0547052908062,95.2899824253077,101.514617823177,100.898338981944,101.858252990756,113.172966781214,98.2535211267606,95.4248366013072,106.161380167412,100.278035217794,93.2518978881316,96.9730227158086,107.132094379721,76.5624605106655,101.73073256383	0.891
207230	91	177	86.4	1.33	10.6	3.57	17.7	4.97	TRUE	active		6.55407	-1.32912	90.4794	188.401	10.6177	50,50,25,25,12.5,6.25,6.25,3.125,3.125,1.5625,1.5625,0.78125,0.78125,0.390625,0.390625,0.1953125,0.1953125	173.20468024703,183.471760797342,93.9657612052962,161.230228471002,143.923916872138,127.421133109875,126.082303920463,112.485681557847,91.6056338028172,105.555555555556,90.4161672905912,98.239110287303,91.8889875380602,90.4625412330412,93.9143986718842,87.9116401688354,92.4655887673358	8.44e-12
207278	103	92.8	9.97	-0.286	21.9	-592	636	4.66	FALSE	inactive	Response Difference lower than 25%	8.71447	0.285836	80.2952	108.557	21.9379	50,50,25,25,12.5,6.25,6.25,3.125,3.125,1.5625,1.5625,0.78125,0.78125,0.390625,0.390625,0.1953125,0.1953125	86.6677238019972,94.1029900332226,96.0726485950858,93.6731107205626,103.134906657273,96.4170166940936,104.645737046757,79.495990836197,103.43661971831,91.5032679738563,102.995546868631,104.726598702502,97.6828639738768,102.423723643658,113.95700298978,89.8856489154933,108.43001578434	0.405
207300	98.9	71.5	27.4	-0.739	8.02	-20.8	36.8	5.1	TRUE	active		6.23458	0.738768	63.8283	101.114	8.0177	50,50,25,25,12.5,6.25,6.25,3.125,3.125,1.5625,1.5625,0.78125,0.78125,0.390625,0.390625,0.1953125,0.1953125	64.7069701637015,79.6511627906978,65.1555874174043,81.0193321616873,82.1415991546319,80.2868904045087,90.2116796174508,83.1615120274915,93.6338028169012,83.9869281045752,94.7799466336605,96.7562557924003,97.6145854462543,99.3953431005084,100.923176864904,92.5170811222093,101.117491014959	2.71e-05
207309	104	113	8.95	0.121	0.734			6.13	FALSE	inactive	Response Difference lower than 25%	5.30005	-0.120618	79.3121	133.757	0.733772	50,50,25,25,12.5,6.25,6.25,3.125,3.125,1.5625,1.5625,0.78125,0.78125,0.390625,0.390625,0.1953125,0.1953125	116.733247770557,113.12292358804,108.369802015165,109.841827768014,112.856639661853,112.366845837199,110.075724849262,103.092783505155,107.492957746479,111.764705882353,111.125579529009,105.097312326228,105.386167169334,104.542989330555,115.125462598156,92.5166264725133,109.211382839092	0.127
207543	92.1	75.4	16.7	-0.404	682	-15500	16900	3.17	FALSE	inactive	IC50 larger than highest measured concentration	5.96433	0.404269	19.7569	94.8026	681.801	50,50,25,25,12.5,6.25,6.25,3.125,3.125,1.5625,1.5625,0.78125,0.78125,0.390625,0.390625,0.1953125,0.1953125	24.1745310591603,70.348837209302,91.8593737140919,77.5043936731108,83.6209933075024,72.2198459723923,84.5657898986904,83.3906071019473,92.6197183098592,90.8496732026145,90.1589636834519,89.7126969416125,93.8656287443735,89.7055691901449,92.8073022377265,90.0498309438593,92.3533114943813	0.0142
207883	95.1	126	31.2	1.71	41.1	-167	249	4.39	TRUE	active		11.2925	-1.70885	95.0598	148.71	41.1404	50,50,25,25,12.5,6.25,6.25,3.125,3.125,1.5625,1.5625,0.78125,0.78125,0.390625,0.390625,0.1953125,0.1953125	113.07116660552,140.199335548172,96.4137275484205,122.144112478032,109.897851356111,90.5024078468299,101.930452673654,73.0813287514318,100.732394366197,95.0980392156862,94.6943234053617,99.5366079703429,94.5470839194092,95.0041765417938,108.238730939976,87.66497933684,100.056465340472	0.00528
207939	87.2	93.8	6.63	0.0458	1.36	-60.9	63.7	5.87	FALSE	inactive	Response Difference lower than 25%	4.93508	-0.0458479	37.2504	141.725	1.35581	50,50,25,25,12.5,6.25,6.25,3.125,3.125,1.5625,1.5625,0.78125,0.78125,0.390625,0.390625,0.1953125,0.1953125	86.1441442284024,103.488372093023,87.2476426310181,96.2741652021089,91.0884114124692,91.5777806784858,89.5681101878236,89.1179839633447,89.6901408450703,99.6732026143791,88.3617106947783,88.22984244671,89.0259003953725,85.0121357281303,88.749114992669,85.8557677328425,87.4971288617659	0.283
208268	85.2	6.87	78.3	-2.99	4.48	2.2	6.75	5.35	TRUE	active		17.5261	2.98713	6.80951	85.2198	4.47501	50,50,25,25,12.5,6.25,6.25,3.125,3.125,1.5625,1.5625,0.78125,0.78125,0.390625,0.390625,0.1953125,0.1953125	5.35814568826946,7.47508305647838,94.4777314157839,8.40070298769771,12.398731947869,28.8534872987827,21.9720807753414,44.2153493699885,95.2112676056339,43.1372549019609,100.428074401215,77.1084337349398,90.8663392400908,88.0399254254031,97.2948717461675,75.5760311354808,95.5902946770207	3.73e-06
208303	82.6	18.8	63.9	-1.02	16.8	-4.44	38.1	4.77	TRUE	active		4.8033	1.01741	-2.66257	83.5504	16.849	50,50,25,25,12.5,6.25,6.25,3.125,3.125,1.5625,1.5625,0.78125,0.78125,0.390625,0.390625,0.1953125,0.1953125	14.2485404517936,22.5083056478405,28.4373697891474,36.3093145869948,49.5244804508628,56.093449164829,58.7713319621513,78.8087056128293,63.6619718309859,84.967320261438,72.8708909128909,80.0741427247451,78.2550956730701,80.9240238672193,81.7400368818871,82.4840855891427,81.970676682927	1.86e-12
208348	89.7	71.9	17.8	-2.97	8.1	-1.79	18	5.09	FALSE	inactive	Response Difference lower than 25%	6.78779	2.96771	71.8615	89.6994	8.1049	50,50,25,25,12.5,6.25,6.25,3.125,3.125,1.5625,1.5625,0.78125,0.78125,0.390625,0.390625,0.1953125,0.1953125	74.3800985346489,73.255813953488,63.2223499843689,75.254833040422,80.2395209580838,79.3905327098881,83.7801448780632,88.659793814433,100.281690140845,88.2352941176471,76.8080845914089,89.3419833178869,85.6853512630972,90.1588956893607,98.0327294255916,84.3750539060759,96.2605460730224	0.0012
209188	83.6	63.3	20.3	-0.465	310	-4890	5510	3.51	FALSE	inactive	IC50 larger than highest measured concentration	8.7922	0.464532	10.3974	85.9856	310.404	50,50,25,25,12.5,6.25,6.25,3.125,3.125,1.5625,1.5625,0.78125,0.78125,0.390625,0.390625,0.1953125,0.1953125	56.8625442073164,64.8671096345513,19.4421020698486,75.0439367311073,75.3786544557943,73.6559296433215,78.4212878220491,83.1615120274915,57.4647887323944,96.4052287581699,72.1017845082901,84.8934198331789,77.7777223568948,83.8001631226994,80.6332403654917,84.7866723453305,84.2037347893198	0.0294
209295	83	59.1	24	-9.92	65	-926	1060	4.19	FALSE	inactive	IC50 larger than highest measured concentration	12.1023	9.91935	-265.034	83.0353	65.0148	50,50,25,25,12.5,6.25,6.25,3.125,3.125,1.5625,1.5625,0.78125,0.78125,0.390625,0.390625,0.1953125,0.1953125	47.7128253613851,70.4318936877077,92.6559528525279,79.2618629173988,84.6072560760831,72.7612035970852,77.2778744338995,62.3138602520046,93.5211267605633,64.0522875816993,95.7212456078791,78.5912882298424,87.7979731474738,88.7964543338916,96.2497183272348,80.0164609933963,91.8507318487115	0.0643
209612	83.3	65.3	18	-0.875	94.6	-734	924	4.02	FALSE	inactive	IC50 larger than highest measured concentration	7.19759	0.874597	33.4504	83.5181	94.6362	50,50,25,25,12.5,6.25,6.25,3.125,3.125,1.5625,1.5625,0.78125,0.78125,0.390625,0.390625,0.1953125,0.1953125	68.1058161290227,58.9700996677741,89.4111481642935,64.8506151142355,68.8974991194082,74.9105507046388,73.7770612289095,89.5761741122566,84.9577464788731,118.300653594771,82.1996487694548,79.8887859128823,83.5724855268362,80.0157952797817,84.7526108341093,83.8819461948831,83.5340460501984	0.0128
209701	95.2	76.1	19.1	-1.92	24.1	-47.6	95.7	4.62	FALSE	inactive	Response Difference lower than 25%	9.59235	1.91942	71.4311	95.2149	24.087	50,50,25,25,12.5,6.25,6.25,3.125,3.125,1.5625,1.5625,0.78125,0.78125,0.390625,0.390625,0.1953125,0.1953125	70.981337593617,79.1528239202657,90.8913293608676,80.2460456942004,85.4526241634377,90.1442027532898,88.0672072851268,121.420389461627,97.3521126760564,90.5228758169934,97.518192501164,100.64874884152,88.2758341674177,90.0076391448197,98.5860976920131,82.3197965843774,94.4182259446712	0.0398
209755	88.5	50.9	37.6	-1.34	84.9	-586	756	4.07	FALSE	inactive	IC50 larger than highest measured concentration	7.73032	1.33617	-25.439	88.4925	84.8541	50,50,25,25,12.5,6.25,6.25,3.125,3.125,1.5625,1.5625,0.78125,0.78125,0.390625,0.390625,0.1953125,0.1953125	13.7188391293682,50.0830564784053,81.4976054394889,62.9525483304042,72.6312081718916,84.2297687254959,78.2784453853668,98.0526918671249,96.2253521126759,99.9999999999999,85.6231309050326,82.483781278962,84.7309593243973,88.4944336163733,86.1053998993475,84.9510950705946,85.2085855268859	0.000261
209862	99.4	70.7	28.7	-7.41	28.3	0.211	56.4	4.55	TRUE	active		7.67495	7.41463	70.2986	99.4165	28.2922	50,50,25,25,12.5,6.25,6.25,3.125,3.125,1.5625,1.5625,0.78125,0.78125,0.390625,0.390625,0.1953125,0.1953125	75.1629171663615,66.279069767442,96.2997321561895,85.8699472759228,102.430433251145,107.169463001208,103.215825464064,113.631156930126,96.9014084507043,90.5228758169934,102.396184270537,99.1658943466172,92.4340186679699,95.9126020778571,104.48789941798,85.1157852368558,98.9952763139875	0.000408
209896	78.2	78.2	0.0247	-1.94	1490			2.83	FALSE	inactive	IC50 larger than highest measured concentration	11.9252	1.94403	60.1529	78.2344	1487.86	50,50,25,25,12.5,6.25,6.25,3.125,3.125,1.5625,1.5625,0.78125,0.78125,0.390625,0.390625,0.1953125,0.1953125	70.1957131603571,84.3023255813952,14.1472873419846,82.3550087873463,83.4800986262769,82.2578051065931,83.4234454469465,89.8052691867124,48.2253521126761,86.2745098039215,62.2598159921483,85.4494902687674,70.3477549554583,83.8001631226994,77.621086298137,82.1552401386145,79.7383627356341	1
210443	100	88.4	12.1	-7.22	1.39	-0.344	3.13	5.86	FALSE	inactive	Response Difference lower than 25%	11.2631	7.22284	88.4046	100.478	1.39477	50,50,25,25,12.5,6.25,6.25,3.125,3.125,1.5625,1.5625,0.78125,0.78125,0.390625,0.390625,0.1953125,0.1953125	90.5896391951771,76.5780730897009,103.587309278275,80.7381370826012,87.7773864036633,91.3989403609204,93.4984731637705,65.979381443299,105.577464788732,89.2156862745099,94.9511096096978,107.136237256719,94.7514539668603,98.4875084103217,110.637493199365,87.5009042848727,103.964026623108	0.199
210705	94.5	101	6.93	8.03	80.4	-545	706	4.09	FALSE	inactive	IC50 larger than highest measured concentration	3.47331	-8.03237	94.5381	416.868	80.4328	50,50,25,25,12.5,6.25,6.25,3.125,3.125,1.5625,1.5625,0.78125,0.78125,0.390625,0.390625,0.1953125,0.1953125	102.61521960286,100.332225913621,88.6710020217194,96.0632688927946,94.1880943994362,98.5671213526826,97.35754272899,90.2634593356242,91.9436619718307,89.8692810457516,93.9239091386451,98.4244670991659,94.95637822314,95.6103844117138,98.340784956765,92.271142380907,97.6569333983959	0.062
211205	101	86.7	14.1	-2.21	63			4.2	FALSE	inactive	IC50 larger than highest measured concentration	8.63634	2.20781	63.1549	100.83	62.9972	50,50,25,25,12.5,6.25,6.25,3.125,3.125,1.5625,1.5625,0.78125,0.78125,0.390625,0.390625,0.1953125,0.1953125	84.3136563037646,89.2857142857143,54.1707048134956,95.4305799648506,99.5420922860161,107.348536411398,106.71747522798,102.634593356243,83.0422535211269,103.59477124183,85.3669012377664,110.658016682113,96.0473937221441,105.450873257898,108.116104564129,96.3000607759666,105.24788257242	0.155
212483	88	57	31.1	-0.708	589	-2580	3760	3.23	FALSE	inactive	IC50 larger than highest measured concentration	3.25031	0.70792	-125.378	88.779	588.827	50,50,25,25,12.5,6.25,6.25,3.125,3.125,1.5625,1.5625,0.78125,0.78125,0.390625,0.390625,0.1953125,0.1953125	51.8952551770227,60.4651162790695,42.6133457555045,71.1775043936734,75.589996477633,80.2874731360746,83.2088913200736,84.7651775486827,77.1830985915491,83.0065359477124,83.3975669868888,89.3419833178869,86.9806924728464,90.3102014710585,89.1183537474025,87.0069407624874,88.4453872073059	3.58e-09
212517	90.4	78.8	11.6	-5.53	1.12	-0.42	2.67	5.95	FALSE	inactive	Response Difference lower than 25%	7.79922	5.52582	78.804	90.4001	1.12385	50,50,25,25,12.5,6.25,6.25,3.125,3.125,1.5625,1.5625,0.78125,0.78125,0.390625,0.390625,0.1953125,0.1953125	70.9798921806986,83.5548172757475,87.4181265633979,77.5043936731108,77.6329693554067,73.4759821357809,77.4210189613052,66.6666666666666,94.7605633802818,74.1830065359477,86.5641237838625,87.1177015755329,90.7979055339967,90.3103491825277,95.1429617998745,81.7434344906619,94.4740923278195	0.0499
212959	85.8	56.6	29.2	-1.44	18.5	-1.13	38.1	4.73	TRUE	active		2.40444	1.44159	49.6334	85.8818	18.5107	50,50,25,25,12.5,6.25,6.25,3.125,3.125,1.5625,1.5625,0.78125,0.78125,0.390625,0.390625,0.1953125,0.1953125	44.5752590371254,55.7308970099669,86.3936862438369,65.9753954305799,71.9971821063752,77.239262588167,78.2063386534607,82.2451317296678,88.6760563380283,87.2549019607843,85.4513835650708,83.7812789620018,86.9121035882803,84.4056324352723,86.4743987198712,83.2241750615281,85.431125398159	1.6e-09
212962	92.1	59.9	32.2	-0.575	86.2	-1890	2060	4.06	FALSE	inactive	IC50 larger than highest measured concentration	10.6085	0.574835	12.5587	94.4979	86.2188	50,50,25,25,12.5,6.25,6.25,3.125,3.125,1.5625,1.5625,0.78125,0.78125,0.390625,0.390625,0.1953125,0.1953125	47.7116350213348,65.6146179401995,88.3860968575728,63.5852372583478,69.1792884818598,69.5334534537333,75.6337340528049,69.6449026345933,95.2112676056339,88.5620915032679,100.427768305826,91.566265060241,88.2075778081482,86.6762531410231,98.8935333931439,82.8130647601691,93.4692960409192	0.00225
213071	84.6	78.3	6.36	-0.398	1400			2.85	FALSE	inactive	IC50 larger than highest measured concentration	4.67868	0.398217	50.5805	85.6393	1395.35	50,50,25,25,12.5,6.25,6.25,3.125,3.125,1.5625,1.5625,0.78125,0.78125,0.390625,0.390625,0.1953125,0.1953125	11.8697308853706,80.2325581395346,87.6463950692964,72.1616871704745,77.2102853117296,76.1639480296678,78.7067635556822,88.2016036655212,88.2253521126762,85.2941176470587,84.5961530488077,83.4105653382762,86.3668507748392,81.6815867559928,84.5069581920639,83.4709696140223,83.2541151771339	0.365
213333	91.3	74.9	16.4	-2.73	1.43	0.321	2.55	5.84	FALSE	inactive	Response Difference lower than 25%	3.93177	2.73242	74.8544	91.3251	1.43432	50,50,25,25,12.5,6.25,6.25,3.125,3.125,1.5625,1.5625,0.78125,0.78125,0.390625,0.390625,0.1953125,0.1953125	75.9496469153826,74.0033222591362,93.168515535413,71.8804920913884,74.1810496653749,74.1942570638719,77.4203218288663,80.4123711340207,103.887323943662,84.3137254901962,76.9794980091279,91.9369786839666,87.594046467085,88.6453455008196,96.0038657400139,84.0463421760471,94.6971404053071	1.38e-05
213836	83.2	73.4	9.83	-3.39	81.4	-649	812	4.09	FALSE	inactive	IC50 larger than highest measured concentration	2.94915	3.39296	22.0035	83.2409	81.4086	50,50,25,25,12.5,6.25,6.25,3.125,3.125,1.5625,1.5625,0.78125,0.78125,0.390625,0.390625,0.1953125,0.1953125	69.9353687864781,76.827242524917,86.0520148181048,79.121265377856,79.1123635082777,79.0322110700348,81.7081975571086,84.9942726231387,84.1690140845067,94.1176470588236,82.6279040452176,82.8544949026876,83.7766560591097,84.253785044854,86.5354619763261,83.8818392184838,84.9850292431838	0.00165
214027	88	75.7	12.3	-3.61	1.68	-0.627	3.99	5.77	FALSE	inactive	Response Difference lower than 25%	8.61265	3.61054	75.6697	88.0185	1.68308	50,50,25,25,12.5,6.25,6.25,3.125,3.125,1.5625,1.5625,0.78125,0.78125,0.390625,0.390625,0.1953125,0.1953125	80.9167658970976,71.8438538205979,91.1756050230922,70.755711775044,68.8974991194082,69.5338613658294,76.5633136842683,64.3757159221076,89.3521126760561,74.5098039215685,91.5272100713175,85.8202038924931,86.2988160991014,84.1036609549105,94.9585923539768,82.5663771840736,92.2969369050185	0.0651
214151	85.1	77.2	7.89	-0.167	1.2	-10.7	13.1	5.92	FALSE	inactive	Response Difference lower than 25%	6.60928	0.166671	64.9916	99.9473	1.19791	50,50,25,25,12.5,6.25,6.25,3.125,3.125,1.5625,1.5625,0.78125,0.78125,0.390625,0.390625,0.1953125,0.1953125	80.6544659645644,74.5847176079735,84.4009238496151,73.9894551845344,73.0538922155687,75.8061508482239,78.2781665323912,74.2268041237113,85.1830985915495,100.653594771242,84.5956521654441,81.1862835959222,82.5497263871016,81.9837551849805,84.1993825293105,82.4836041953471,82.9753459182736	0.378
214216									FALSE	inconclusive	Fit did not converge						50,50,25,25,12.5,6.25,6.25,3.125,3.125,1.5625,1.5625,0.78125,0.78125,0.390625,0.390625,0.1953125,0.1953125	82.2229090295371,84.1362126245848,91.0051396054743,83.3391915641479,81.4371257485028,87.8145002260996,85.1376011626309,123.711340206186,97.2394366197186,82.0261437908496,79.1191326035836,96.014828544949,88.0713311098476,89.7050275814242,95.1431417505322,82.8125298781739,93.9159730029969
214224	88.7	70.9	17.9	-1.64	44.5	-222	312	4.35	FALSE	inactive	Response Difference lower than 25%	7.43155	1.63587	56.0826	88.7134	44.5156	50,50,25,25,12.5,6.25,6.25,3.125,3.125,1.5625,1.5625,0.78125,0.78125,0.390625,0.390625,0.1953125,0.1953125	71.2426172346786,69.7674418604653,86.2231652819322,76.8014059753954,78.1965480803098,87.9925247194728,80.3502765175816,102.863688430699,96.0000000000002,102.287581699346,87.505589719202,82.6691380908249,84.3898992115823,85.1631460868894,85.4905085025685,85.1975686938916,84.6494679398561	0.016
214306	91.1	63.8	27.3	-1.54	193	-2110	2490	3.71	FALSE	inactive	IC50 larger than highest measured concentration	7.75096	1.53564	-152.686	91.1465	192.571	50,50,25,25,12.5,6.25,6.25,3.125,3.125,1.5625,1.5625,0.78125,0.78125,0.390625,0.390625,0.1953125,0.1953125	52.6802844402575,74.5016611295678,91.6314199591544,73.2864674868189,83.3392039450509,87.0961670248521,87.9245042749322,98.7399770904926,94.4225352112675,83.0065359477124,96.0630428497373,92.678405931418,88.4799160262781,88.94830172431,99.078082789699,81.6616242895266,93.5809925067717	0.000782
214334	81.4	52.8	28.7	-2.24	76	-159	311	4.12	FALSE	inactive	IC50 larger than highest measured concentration	5.31787	2.24414	-20.6488	81.4301	76.0367	50,50,25,25,12.5,6.25,6.25,3.125,3.125,1.5625,1.5625,0.78125,0.78125,0.390625,0.390625,0.1953125,0.1953125	45.6217379900002,59.3853820598006,82.0101125780872,69.4903339191564,71.9971821063752,75.6274853501282,79.6358319566903,118.4421534937,84.3943661971831,87.5816993464053,81.7718665502022,82.2984244670991,82.3453785080031,79.4103752043651,84.0156129189377,79.1123499572427,82.6960140025331	8.59e-06
214373	91.6	96.2	4.64	0.0384	0.719	-160	162	6.14	FALSE	inactive	Response Difference lower than 25%	11.2287	-0.0383935	49.0066	136.301	0.718766	50,50,25,25,12.5,6.25,6.25,3.125,3.125,1.5625,1.5625,0.78125,0.78125,0.390625,0.390625,0.1953125,0.1953125	109.674871368878,86.2956810631226,97.3247834629105,96.4850615114236,98.978513561113,98.7458451239346,97.6423678056802,64.8339060710195,101.971830985916,83.6601307189542,86.3929329809712,99.1658943466172,93.115651189831,93.0367582453163,103.873887779971,85.4445237109847,98.2147804698892	0.94
214403	91.6	86.3	5.29	-1.25	53.6	-246	353	4.27	FALSE	inactive	IC50 larger than highest measured concentration	2.4287	1.24734	80.4898	91.5672	53.6315	50,50,25,25,12.5,6.25,6.25,3.125,3.125,1.5625,1.5625,0.78125,0.78125,0.390625,0.390625,0.1953125,0.1953125	84.0530568570176,88.0398671096345,92.5426980507936,85.4481546572934,89.6090172595982,90.5031653978656,91.998476533244,92.5544100801832,88.2253521126762,92.8104575163398,89.0460286766859,89.7126969416125,91.3436017145004,90.160372804054,94.8369457094864,90.8728538695706,94.0842255604312	0.0296
214468	104	91.6	12.1	-0.624	17.9	-233	268	4.75	FALSE	inactive	Response Difference lower than 25%	7.89731	0.62392	84.5876	104.83	17.8666	50,50,25,25,12.5,6.25,6.25,3.125,3.125,1.5625,1.5625,0.78125,0.78125,0.390625,0.390625,0.1953125,0.1953125	84.0523766627031,92.2757475083055,107.231162640986,94.4463971880494,91.4406481155335,92.294598777662,92.4982972540186,101.030927835052,113.014084507042,96.4052287581699,95.2934077349195,102.316960148285,101.295640482516,104.239885395595,114.141152495986,92.9281914235683,107.313214477815	0.157
214516	92	88.1	3.94	-0.0258	0.987	-182	184	6.01	FALSE	inactive	Response Difference lower than 25%	3.75262	0.0257511	35.6696	146.012	0.986961	50,50,25,25,12.5,6.25,6.25,3.125,3.125,1.5625,1.5625,0.78125,0.78125,0.390625,0.390625,0.1953125,0.1953125	83.5292222105549,90.1993355481729,86.3938343619363,88.822495606327,87.284255019373,89.6057587864263,89.425012135914,91.1798396334479,93.1830985915491,101.307189542484,89.9873833046115,90.6394810009267,90.3891654390938,88.1926590846371,91.5159963138107,88.981029741445,90.734257246181	0.489
214529	90.3	44.6	45.7	-1.64	213	-1420	1850	3.67	FALSE	inactive	IC50 larger than highest measured concentration	11.2409	1.643	-451.463	90.2659	213.396	50,50,25,25,12.5,6.25,6.25,3.125,3.125,1.5625,1.5625,0.78125,0.78125,0.390625,0.390625,0.1953125,0.1953125	32.2847429439406,55.2325581395348,92.3145036039446,64.0773286467486,82.0007044734059,79.2110513876002,87.424590603166,71.2485681557846,100.619718309859,80.718954248366,90.6718960744939,94.1612604263207,91.8202434750225,93.4907740647217,104.119660389121,84.9510683264946,97.8230442296404	0.000173
214630	88.3	77.7	10.6	-1.56	50	-165	265	4.3	FALSE	inactive	IC50 larger than highest measured concentration	4.41031	1.55634	67.0635	88.3371	50.0099	50,50,25,25,12.5,6.25,6.25,3.125,3.125,1.5625,1.5625,0.78125,0.78125,0.390625,0.390625,0.1953125,0.1953125	70.980232277856,83.6378737541527,85.4255308020381,83.4094903339193,82.3529411764707,87.8133347629679,86.6381322613605,92.5544100801832,89.4647887323946,103.59477124183,86.1364806988772,85.0787766450416,86.2307370866573,85.6167680090441,88.3185330582357,97.1223883550839,85.9891539718721	0.0173
214784	87.1	42	45	-1.29	202	-1340	1740	3.69	FALSE	inactive	IC50 larger than highest measured concentration	14.0417	1.29409	-232.239	87.0971	201.883	50,50,25,25,12.5,6.25,6.25,3.125,3.125,1.5625,1.5625,0.78125,0.78125,0.390625,0.390625,0.1953125,0.1953125	30.1961212769459,48.3388704318936,87.1338509011736,66.0456942003518,69.0383938006338,73.8354109656093,83.0652820377086,51.3172966781214,97.4647887323943,76.4705882352941,98.117694233525,91.9369786839666,90.9339970538257,90.6129115087671,98.6474608662305,83.7997348322508,93.0782313588824	0.00176
214963	85	66.3	18.7	-2.26	146	-760	1050	3.84	FALSE	inactive	IC50 larger than highest measured concentration	3.54303	2.26312	-145.455	85.0371	146.134	50,50,25,25,12.5,6.25,6.25,3.125,3.125,1.5625,1.5625,0.78125,0.78125,0.390625,0.390625,0.1953125,0.1953125	62.0899225386212,70.348837209302,85.4256604053752,78.2073813708263,81.225783726664,80.8237609961444,82.5649733242274,82.9324169530355,88.4507042253519,91.5032679738563,86.9915999077265,85.2641334569045,85.071997268859,82.7402348563126,86.4124357101285,83.6355528038847,84.8731149746681	8.12e-06
215204	92.7	81.6	11	-0.0395	1.42	-85	87.8	5.85	FALSE	inactive	Response Difference lower than 25%	7.49866	0.0395268	-12.0134	189.437	1.41607	50,50,25,25,12.5,6.25,6.25,3.125,3.125,1.5625,1.5625,0.78125,0.78125,0.390625,0.390625,0.1953125,0.1953125	76.9940002610246,76.6611295681061,88.7846456334645,80.1054481546575,90.4543853469533,86.9159864246851,86.9950640699568,76.2886597938145,104.225352112676,91.5032679738563,77.9204630611044,92.678405931418,87.7982613360645,90.4621473357899,96.6192370052133,87.0886707313242,92.6316814483585	0.214
215216	85.4	76.5	8.84	-2.98	84.6	-652	821	4.07	FALSE	inactive	IC50 larger than highest measured concentration	3.58603	2.98385	34.0679	85.3725	84.5904	50,50,25,25,12.5,6.25,6.25,3.125,3.125,1.5625,1.5625,0.78125,0.78125,0.390625,0.390625,0.1953125,0.1953125	76.2085458763431,76.7441860465113,87.987418478344,81.5817223198595,80.5213103205354,80.2867738581955,86.2806659845611,80.8705612829325,87.6619718309863,93.1372549019608,85.3656212025041,86.3762743280816,86.2986830889824,83.0433880284287,86.1664631558027,87.1715506964499,85.0962719534875	0.0181
215335	86.3	79.2	7.12	-5.78	18	-9.3	45.4	4.74	FALSE	inactive	Response Difference lower than 25%	4.56935	5.77962	79.1687	86.3083	18.0315	50,50,25,25,12.5,6.25,6.25,3.125,3.125,1.5625,1.5625,0.78125,0.78125,0.390625,0.390625,0.1953125,0.1953125	83.5304125506054,74.9169435215947,79.504917104317,80.5975395430579,85.8048608665021,86.5589467942769,85.3522017649998,85.2233676975945,89.5774647887325,75.1633986928105,92.8112524004144,86.0055607043558,85.2078227684503,85.4662992590056,92.0074015704894,82.8949284495041,89.1708515784657	0.077
215463	83	73.4	9.6	-1.27	23.7	-132	179	4.63	FALSE	inactive	Response Difference lower than 25%	5.37882	1.26739	69.6527	83.0221	23.7246	50,50,25,25,12.5,6.25,6.25,3.125,3.125,1.5625,1.5625,0.78125,0.78125,0.390625,0.390625,0.1953125,0.1953125	78.0397990195849,66.1960132890363,82.0095571352143,76.5905096660811,74.2514970059881,78.3154512440152,82.27942787735,79.2668957617411,82.5915492957748,96.4052287581699,82.4565741080589,78.7766450417053,82.5493938618046,78.3500038035705,82.8467334256946,83.6350179218901,82.1936884599707	0.0719
215474	89.5	96.1	6.63	0.0988	115			3.94	FALSE	inactive	IC50 larger than highest measured concentration	10.7285	-0.0987697	72.0181	122.241	115.231	50,50,25,25,12.5,6.25,6.25,3.125,3.125,1.5625,1.5625,0.78125,0.78125,0.390625,0.390625,0.1953125,0.1953125	113.856876063069,88.704318936877,84.514511917073,92.5483304042182,91.2293060936947,90.5014172031679,88.3531012982232,118.900343642612,96.112676056338,84.3137254901962,81.9425008160225,93.2344763670065,88.3433368026806,91.3707698204792,95.6350868591834,82.4015800414132,92.9109407632114	0.829
215500	89.7	72.7	17.1	-1.63	46.2	-223	315	4.34	FALSE	inactive	Response Difference lower than 25%	7.59772	1.63073	57.685	89.7519	46.1917	50,50,25,25,12.5,6.25,6.25,3.125,3.125,1.5625,1.5625,0.78125,0.78125,0.390625,0.390625,0.1953125,0.1953125	70.9794670592521,73.5880398671098,86.3936306995497,80.0351493848857,78.9714688270517,89.7845408308351,82.2796137793336,102.863688430699,95.2112676056339,106.535947712418,86.5642072644229,85.8202038924931,87.730137986914,83.9517643273356,84.9370202690421,87.5822063481135,84.2594015200264	0.0256
215582	91.4	85.5	5.97	-2.87	35.1	-152	222	4.45	FALSE	inactive	Response Difference lower than 25%	3.95435	2.86615	83.2957	91.4278	35.0542	50,50,25,25,12.5,6.25,6.25,3.125,3.125,1.5625,1.5625,0.78125,0.78125,0.390625,0.390625,0.1953125,0.1953125	82.7470837731569,88.1229235880397,86.2225357800098,92.3374340949035,90.7361747094048,89.4262774641384,91.5688802867911,96.9072164948454,94.5352112676054,85.6209150326797,92.9822762421838,94.3466172381835,88.8210869808588,90.7642172904649,95.3275911745002,83.8819996830827,92.9669523481349	0.196
215614	86	79.5	6.47	-11.8	3.48	0.249	6.71	5.46	FALSE	inactive	Response Difference lower than 25%	3.42645	11.8119	79.4972	85.9682	3.4805	50,50,25,25,12.5,6.25,6.25,3.125,3.125,1.5625,1.5625,0.78125,0.78125,0.390625,0.390625,0.1953125,0.1953125	71.7638161281724,82.890365448505,86.0524036281156,78.7697715289985,79.8872842550195,76.7034409133499,80.4221276342599,82.0160366552119,87.0985915492956,86.6013071895425,87.5060071220051,85.0787766450416,87.1168283293817,83.9524536475257,85.798723989882,83.9641308134153,87.7201587890316	0.00663
216451	95.9	16.3	79.6	-1.24	6.68	1.63	11.7	5.18	TRUE	active		9.68087	1.24355	9.68958	96.9729	6.68064	50,50,25,25,12.5,6.25,6.25,3.125,3.125,1.5625,1.5625,0.78125,0.78125,0.390625,0.390625,0.1953125,0.1953125	24.9678076784586,8.38870431893687,87.8170456345382,23.2337434094903,35.5054596688975,57.3485946845556,55.1989464934587,54.2955326460481,92.8450704225349,78.1045751633987,83.4841641550612,94.1612604263207,91.3433135259098,94.3990518893158,103.627755269505,86.349383581931,98.4382641527036	7.44e-09
300044	93.1	68	25.1	-0.851	174	-1870	2220	3.76	FALSE	inactive	IC50 larger than highest measured concentration	2.63069	0.850799	-5.64237	93.4464	174.398	50,50,25,25,12.5,6.25,6.25,3.125,3.125,1.5625,1.5625,0.78125,0.78125,0.390625,0.390625,0.1953125,0.1953125	65.2287642272207,70.6810631229233,97.4390010322905,78.1370826010544,82.1415991546319,90.1439696606635,87.7109958467172,89.3470790378007,93.1830985915491,86.6013071895425,90.9292666427545,92.678405931418,94.820308871664,91.8253272486061,95.5744434875958,90.4613958949143,94.8658467182899	3.29e-09
300062	102	67.5	34.6	-0.618	384	-3850	4620	3.42	FALSE	inactive	IC50 larger than highest measured concentration	9.91589	0.618335	-59.9204	103.622	384.48	50,50,25,25,12.5,6.25,6.25,3.125,3.125,1.5625,1.5625,0.78125,0.78125,0.390625,0.390625,0.1953125,0.1953125	56.5975234975252,70.9302325581393,98.9758744314002,75.254833040422,84.6777034166959,79.570421944272,83.6378833850801,88.2016036655212,111.323943661972,101.960784313725,93.2395911567375,103.2437442076,101.431953685877,99.2432495243079,109.099734852703,93.9970193700827,104.856817890383	0.000638
300189	89.8	85	4.8	-1.34	14.7	-69.2	98.6	4.83	FALSE	inactive	Response Difference lower than 25%	2.96044	1.33626	84.0614	89.8193	14.7389	50,50,25,25,12.5,6.25,6.25,3.125,3.125,1.5625,1.5625,0.78125,0.78125,0.390625,0.390625,0.1953125,0.1953125	80.1318216581522,89.7009966777407,82.0097793123635,90.2284710017575,87.284255019373,86.5581309700846,89.8542598161474,86.8270332187858,91.718309859155,87.5816993464053,90.7577697444745,91.1955514365152,91.0705319407173,88.3427831745806,90.654812450426,87.7473779081702,90.3995308530632	0.0975
300227	86.1	78.6	7.55	-9.21	67.2	-1020	1150	4.17	FALSE	inactive	IC50 larger than highest measured concentration	13.2834	9.2084	-36.6711	86.132	67.2207	50,50,25,25,12.5,6.25,6.25,3.125,3.125,1.5625,1.5625,0.78125,0.78125,0.390625,0.390625,0.1953125,0.1953125	75.1632572635188,81.9767441860465,13.1229025667108,94.9384885764502,94.2585417400494,92.4724484515655,91.854332782676,60.7101947308133,61.9718309859155,92.8104575163398,67.7366138225446,93.9759036144578,85.5490602280903,91.220005647502,96.4338878279578,87.500583355676,94.4178084895666	0.864
300389	86.2	82.9	3.32	-2.48	299	-434	1030	3.52	FALSE	inactive	IC50 larger than highest measured concentration	2.95966	2.47983	-196.57	86.2439	298.751	50,50,25,25,12.5,6.25,6.25,3.125,3.125,1.5625,1.5625,0.78125,0.78125,0.390625,0.390625,0.1953125,0.1953125	78.039288873849,87.2923588039864,21.6054039407376,87.486818980668,85.4526241634377,87.6342613527761,87.995611783676,87.2852233676977,61.8591549295775,85.2941176470587,74.1549610688407,87.6737720111214,80.7092653740299,86.5257843909845,85.7979641982171,87.0893393338176,86.2132003115668	0.406
300725	90.6	95.3	4.75	0.022	0.0387	-7.39	7.47	7.41	FALSE	inconclusive	IC50 lower than lowest measured concentration	6.50793	-0.0220117	11.0829	167.29	0.0386936	50,50,25,25,12.5,6.25,6.25,3.125,3.125,1.5625,1.5625,0.78125,0.78125,0.390625,0.390625,0.1953125,0.1953125	98.9540737050057,95.0166112956811,92.5989644137935,97.3989455184537,97.5695667488552,93.0106593258026,90.9970690228502,76.9759450171822,100.169014084507,83.0065359477124,97.5179142326288,95.4587581093605,91.2747689780501,90.3105953683099,98.2788019525045,87.0892323574189,93.4686789333729	0.749
300759	86.7	75.6	11	-7.9	4.97	2.1	7.83	5.3	FALSE	inactive	Response Difference lower than 25%	3.1883	7.89802	75.6053	86.6539	4.96751	50,50,25,25,12.5,6.25,6.25,3.125,3.125,1.5625,1.5625,0.78125,0.78125,0.390625,0.390625,0.1953125,0.1953125	-153.892688293728,78.156146179402,80.7572926640529,68.3655536028119,77.5625220147939,74.1924505960176,79.9929496672703,86.1397479954182,87.4366197183099,87.5816993464053,89.216857730481,85.8202038924931,85.8900316674922,85.4655607016592,86.6586681931814,86.0197625525106,85.9335416918312	7.23e-05
301158	97.1	96.3	0.727	0.0357	178			3.75	FALSE	inactive	IC50 larger than highest measured concentration	9.59874	-0.0356926	103.56	88.7809	177.505	50,50,25,25,12.5,6.25,6.25,3.125,3.125,1.5625,1.5625,0.78125,0.78125,0.390625,0.390625,0.1953125,0.1953125	106.536454801725,93.8538205980065,171.960160674811,96.8365553602815,95.8083832335327,95.519376990028,91.2824750432395,80.8705612829325,160.338028169014,87.2549019607843,110.52538212531,96.9416126042632,105.929956871469,89.7049783442678,108.361297332272,89.6382392487047,101.897496803065	1
301228									FALSE	inconclusive	Fit did not converge						50,50,25,25,12.5,6.25,6.25,3.125,3.125,1.5625,1.5625,0.78125,0.78125,0.390625,0.390625,0.1953125,0.1953125	53.1987625564933,67.441860465116,161.20445380016,77.7152899824255,78.266995420923,80.1060105264628,83.9225225597866,90.7216494845361,102.309859154929,94.7712418300654,91.4418094578469,82.6691380908249,87.0484167916406,82.7410226508154,86.2896093891056,88.2402449224655,84.2029180293322
301350	87.9	57.9	30	-2.59	114	-611	840	3.94	FALSE	inactive	IC50 larger than highest measured concentration	3.15909	2.58865	-196.538	87.9047	114.197	50,50,25,25,12.5,6.25,6.25,3.125,3.125,1.5625,1.5625,0.78125,0.78125,0.390625,0.390625,0.1953125,0.1953125	55.2939310937652,60.4651162790695,81.2126447310551,84.1124780316344,86.7911236350827,85.6625890996562,84.2804071160489,92.3253150057274,87.9999999999998,87.9084967320261,88.8741143756033,91.3809082483781,83.230982046959,85.7690092967138,91.8229321520041,84.2930297521425,90.7339486924082	1.86e-09
301817	83.8	38.4	45.4	-5.2	71.1	-558	700	4.15	FALSE	inactive	IC50 larger than highest measured concentration	3.47142	5.19898	-245.179	83.8235	71.1074	50,50,25,25,12.5,6.25,6.25,3.125,3.125,1.5625,1.5625,0.78125,0.78125,0.390625,0.390625,0.1953125,0.1953125	-41.1864459379434,38.3720930232558,84.3437502632568,80.878734622144,76.1535752025362,83.5120765289709,81.850528763336,90.7216494845361,85.0704225352116,104.901960784314,83.4828841197995,83.2252085264133,83.776567385697,81.3781873980947,85.4901685957712,86.1018669387432,84.6496131416317	6.38e-09
301897	88.3	94.8	6.46	1.88	0.0652			7.19	FALSE	inconclusive	IC50 lower than lowest measured concentration	6.07713	-1.87565	37.7513	94.7717	0.0652179	50,50,25,25,12.5,6.25,6.25,3.125,3.125,1.5625,1.5625,0.78125,0.78125,0.390625,0.390625,0.1953125,0.1953125	124.053498983322,90.8637873754154,93.6239046319398,97.0474516695958,94.1176470588234,94.0864400695546,90.1387828021146,111.111111111111,97.5774647887321,89.2156862745099,89.130956233647,97.126969416126,90.2521650167871,91.5212385705173,96.1877353229747,84.4575861979049,91.6831145490454	0.491
301905	88.9	87.5	1.39	-0.0375	0.151	-15.4	15.7	6.82	FALSE	inconclusive	IC50 lower than lowest measured concentration	4.83878	0.0374787	75.5218	102.391	0.151184	50,50,25,25,12.5,6.25,6.25,3.125,3.125,1.5625,1.5625,0.78125,0.78125,0.390625,0.390625,0.1953125,0.1953125	83.5297323562908,87.0431893687708,86.5641146319298,86.5026362038664,84.1845720324055,97.8494291561578,85.7810079280223,107.903780068729,98.1408450704227,107.18954248366,89.8159977137459,86.93234476367,86.7756573748014,88.7970944169252,86.4742187692135,89.3097147273743,85.431179848825	0.977
301913	91.6	92.6	1.05	-0.005	6.06e+55	6.06e+55	6.06e+55	-49.8	FALSE	inactive	IC50 larger than highest measured concentration	4.60065	0.00499523	201.925	33.9479	6.06334e+55	50,50,25,25,12.5,6.25,6.25,3.125,3.125,1.5625,1.5625,0.78125,0.78125,0.390625,0.390625,0.1953125,0.1953125	83.7915221430883,94.4352159468438,89.581946847635,97.609841827768,95.2448045086296,92.1152340016873,91.425875185873,96.9072164948454,95.2112676056339,88.2352941176471,93.5812770911813,95.6441149212234,88.6846851040858,88.1914773928829,96.6188771038982,85.3624728129513,92.7435231159866	0.989
301950	85.5	78.3	7.17	-8.52	78.7	-347	505	4.1	FALSE	inactive	IC50 larger than highest measured concentration	3.21388	8.52392	-266.06	85.5201	78.7457	50,50,25,25,12.5,6.25,6.25,3.125,3.125,1.5625,1.5625,0.78125,0.78125,0.390625,0.390625,0.1953125,0.1953125	72.5485052942499,84.1362126245848,88.4432334144062,85.2372583479792,84.6777034166959,81.9000079251491,86.0669948921107,88.8888888888889,88.338028169014,87.5816993464053,85.6231587318861,84.5227062094532,85.753363770482,81.5291977568538,85.675377811404,83.7171223081226,84.8171033897445	0.0324
302024	88.6	113	23.9	8.44	69.6	-1000	1140	4.16	FALSE	inactive	IC50 larger than highest measured concentration	12.3616	-8.43948	88.6105	503.195	69.6191	50,50,25,25,12.5,6.25,6.25,3.125,3.125,1.5625,1.5625,0.78125,0.78125,0.390625,0.390625,0.1953125,0.1953125	131.112725627894,93.9368770764117,77.1707424910372,97.609841827768,95.7379358929199,97.3121506524259,95.356029022088,64.8339060710195,83.1549295774647,86.6013071895425,77.9206021953717,94.5319740500463,86.230338056301,93.338434302739,98.0330893269067,86.431487968164,95.032865060632	0.0726
302048	91.4	91	0.417	0.105	12.7			4.9	FALSE	inactive	Response Difference lower than 25%	2.38149	-0.104522	92.5317	89.6209	12.7403	50,50,25,25,12.5,6.25,6.25,3.125,3.125,1.5625,1.5625,0.78125,0.78125,0.390625,0.390625,0.1953125,0.1953125	90.328189505537,89.9501661129568,96.1861811182565,90.2987697715289,88.5523071504052,90.1442027532898,93.7843671768669,87.0561282932417,92.1690140845071,90.8496732026145,91.7844415053108,91.3809082483781,92.0249238794175,88.9491879931257,93.1765609869774,90.7078695182118,92.8562722947115	0.995
302283									FALSE	inconclusive	Fit did not converge						50,50,25,25,12.5,6.25,6.25,3.125,3.125,1.5625,1.5625,0.78125,0.78125,0.390625,0.390625,0.1953125,0.1953125	113.334911950972,104.152823920266,22.3458648342729,108.717047451669,106.375484325466,107.526968816868,104.145544522015,106.071019473081,49.3521126760564,97.3856209150327,59.4352790518611,105.282669138091,78.596044944119,102.423329746407,94.651636521266,95.4771983148541,98.3255331242003
302344	76.6	72.1	4.5	-0.0399	838			3.08	FALSE	inactive	IC50 larger than highest measured concentration	30.0647	0.0398759	28.5749	111.072	838.188	50,50,25,25,12.5,6.25,6.25,3.125,3.125,1.5625,1.5625,0.78125,0.78125,0.390625,0.390625,0.1953125,0.1953125	82.4835084762839,90.9468438538205,9.25148425907299,91.4938488576452,88.481859809792,89.2483112439218,88.7103584352907,92.3253150057274,22.5352112676056,103.59477124183,39.923033705833,90.4541241890639,52.692568170457,89.5543126456037,68.7060508008706,90.0497239674605,75.4954579523335	0.997
302389	92.5	94.9	2.47	0.0222	0.109	-16.6	16.8	6.96	FALSE	inconclusive	IC50 lower than lowest measured concentration	8.93716	-0.0221975	51.994	132.417	0.108629	50,50,25,25,12.5,6.25,6.25,3.125,3.125,1.5625,1.5625,0.78125,0.78125,0.390625,0.390625,0.1953125,0.1953125	101.045926294994,97.5913621262459,78.8774703206043,103.936731107206,100.105671010919,97.6688989170514,97.7851870046147,72.1649484536083,89.5774647887325,94.1176470588236,88.8751439691838,96.3855421686747,93.3198660588105,95.307428188223,100.184719349954,89.2270219709464,96.1483051005116	0.981
302395	91	79.8	11.2	-3.51	7.66	-1.42	16.7	5.12	FALSE	inactive	Response Difference lower than 25%	4.72109	3.50873	79.78	90.9513	7.65515	50,50,25,25,12.5,6.25,6.25,3.125,3.125,1.5625,1.5625,0.78125,0.78125,0.390625,0.390625,0.1953125,0.1953125	73.8563489124756,84.8837209302325,74.9488228823207,85.2372583479792,82.4233885170835,87.275356981357,86.2811307395203,91.8671248568157,90.3661971830988,102.287581699346,91.6984843547692,87.3030583873957,88.1389889235821,91.9759437101133,89.4250496513858,88.1582475126317,87.887449384703	0.00257
302413	88.1	90.4	2.28	0.0335	1.01	-142	144	6	FALSE	inactive	Response Difference lower than 25%	6.40786	-0.0334607	64.1967	113.398	1.0069	50,50,25,25,12.5,6.25,6.25,3.125,3.125,1.5625,1.5625,0.78125,0.78125,0.390625,0.390625,0.1953125,0.1953125	87.9739519587259,92.7740863787376,84.2868729130968,99.9297012302286,94.8925678055653,94.4444120704683,90.4962490789136,76.5177548682703,84.8450704225352,86.2745098039215,82.0280127369075,94.9026876737719,84.1851966388343,89.8564810745913,94.3432610778125,88.2408065485602,90.9009125840842	0.96
302505	88.9	81.7	7.21	-1.02	26.8			4.57	FALSE	inactive	Response Difference lower than 25%	4.17365	1.01564	77.8507	89.0019	26.7907	50,50,25,25,12.5,6.25,6.25,3.125,3.125,1.5625,1.5625,0.78125,0.78125,0.390625,0.390625,0.1953125,0.1953125	75.4247919774481,86.5448504983387,55.9336064322505,87.4165202108965,85.1708348009862,81.0028926794927,84.9942474954934,88.4306987399772,90.2535211267602,97.0588235294117,88.1043957802246,88.6005560704356,89.2980169299711,86.3748232693819,87.0273471014248,87.5002356823792,88.7243924190513	0.111
302569	95.3	106	10.6	1.37	78	-745	901	4.11	FALSE	inactive	IC50 larger than highest measured concentration	6.84015	-1.37277	95.3365	125.408	78.0165	50,50,25,25,12.5,6.25,6.25,3.125,3.125,1.5625,1.5625,0.78125,0.78125,0.390625,0.390625,0.1953125,0.1953125	115.163954462691,97.5083056478402,95.2743846132697,102.108963093146,102.500880591758,99.6417366333033,95.426532349385,87.0561282932417,102.87323943662,89.8692810457516,83.4825501975568,102.502316960148,95.0919820392004,96.2150659297835,100.737667731508,94.9013176149342,97.2084232639016	0.174
302764	90.2	86.8	3.36	-0.0637	2.59	-81.5	86.7	5.59	FALSE	inactive	Response Difference lower than 25%	3.93178	0.0636901	69.4922	107.679	2.59489	50,50,25,25,12.5,6.25,6.25,3.125,3.125,1.5625,1.5625,0.78125,0.78125,0.390625,0.390625,0.1953125,0.1953125	81.6983091644705,84.4684385382061,90.4354959100427,88.7521968365556,84.7481507573086,85.6623560070298,88.9247963734239,97.3654066437572,90.1408450704224,94.7712418300654,88.1894346446001,89.5273401297498,87.1847078266479,86.6760561923973,89.3635265210279,90.2140664604249,86.8268411653204	0.64
302838	89.5	59.8	29.8	-1.08	383	-2050	2810	3.42	FALSE	inactive	IC50 larger than highest measured concentration	4.33262	1.08316	-211.257	89.6019	383.297	50,50,25,25,12.5,6.25,6.25,3.125,3.125,1.5625,1.5625,0.78125,0.78125,0.390625,0.390625,0.1953125,0.1953125	56.0745390939556,61.794019933555,77.1696130905295,78.1370826010544,80.4508629799226,78.3134116835346,81.9930226337988,97.3654066437572,86.8732394366199,90.1960784313725,91.955187078545,89.7126969416125,87.4576002536057,86.6762039038666,92.6220530330585,87.5820993717142,89.2823302416546	1.63e-07
303217	85.9	92.3	6.41	0.0884	4.82			5.32	FALSE	inactive	Response Difference lower than 25%	7.98591	-0.088432	63.2929	115.834	4.82159	50,50,25,25,12.5,6.25,6.25,3.125,3.125,1.5625,1.5625,0.78125,0.78125,0.390625,0.390625,0.1953125,0.1953125	95.0322433361151,84.3023255813952,108.426160951977,87.9789103690687,81.0144417048257,85.3038595477068,83.0656538416758,90.2634593356242,96.4507042253522,100.653594771242,89.7302910048866,85.2641334569045,87.7302044919733,77.8940184979074,85.9206105685822,87.8285997391113,85.6541734756469	0.689
303237	90.3	96.6	6.27	8.69	13.1	4.1	22.1	4.88	FALSE	inactive	Response Difference lower than 25%	3.86965	-8.69254	90.2841	96.5584	13.0861	50,50,25,25,12.5,6.25,6.25,3.125,3.125,1.5625,1.5625,0.78125,0.78125,0.390625,0.390625,0.1953125,0.1953125	140.788659800389,92.7740863787376,61.5704258515704,100.351493848858,92.7791475871784,88.5302694084573,87.4238469952315,114.318442153494,89.3521126760561,99.3464052287581,86.9917946957008,91.566265060241,89.5025199875411,89.7053230043628,92.6836961305209,87.5821528599138,90.4549434806624	0.152
303289	88	84.2	3.83	-11.2	9.43	-13.2	32.1	5.03	FALSE	inactive	Response Difference lower than 25%	8.06912	11.2031	84.1545	87.9893	9.43251	50,50,25,25,12.5,6.25,6.25,3.125,3.125,1.5625,1.5625,0.78125,0.78125,0.390625,0.390625,0.1953125,0.1953125	85.6208197276757,82.8073089700993,34.3010876219463,85.4481546572934,82.7756252201478,98.2081587081072,83.6371862526411,112.027491408935,75.4929577464786,106.535947712418,81.6856867848329,87.3030583873957,83.8445133880226,87.8876841377333,86.2897093616931,91.941253910489,85.0961267517119	0.836
303397	91.4	75.5	15.9	-1.29	236	-2100	2570	3.63	FALSE	inactive	IC50 larger than highest measured concentration	4.39416	1.28579	-41.1681	91.3655	235.929	50,50,25,25,12.5,6.25,6.25,3.125,3.125,1.5625,1.5625,0.78125,0.78125,0.390625,0.390625,0.1953125,0.1953125	39.6072047882279,74.7508305647839,90.7204751332392,82.2144112478031,83.5505459668897,87.096749756418,85.7809846902745,99.8854524627721,95.2112676056339,90.1960784313725,91.698734796451,91.0101946246525,89.5026973343665,90.765398982219,93.7905126414337,86.5955897642309,92.0740158790846	0.00577
303478	86.6	80.3	6.32	-7.63	81.4	-1050	1210	4.09	FALSE	inactive	IC50 larger than highest measured concentration	2.89476	7.63446	-180.449	86.6137	81.3833	50,50,25,25,12.5,6.25,6.25,3.125,3.125,1.5625,1.5625,0.78125,0.78125,0.390625,0.390625,0.1953125,0.1953125	75.6862416670882,84.8837209302325,89.8664076574836,84.8857644991212,83.8323353293412,83.8716801782691,86.42422879143,86.1397479954182,90.2535211267602,89.8692810457516,87.0769726943436,87.4884151992585,85.8903198560828,83.3459503546677,87.2120364596029,85.7736098584098,87.2175246926961	0.037
303592	57.8	73.4	15.6	0.0792	3.61	-126	133	5.44	FALSE	inactive	Response Difference lower than 25%	37.9472	-0.0792419	-5.40836	137.428	3.61475	50,50,25,25,12.5,6.25,6.25,3.125,3.125,1.5625,1.5625,0.78125,0.78125,0.390625,0.390625,0.1953125,0.1953125	107.583698973204,82.4750830564781,3.50137300849428,82.2847100175749,90.1725959845017,91.9358692257127,90.9254270459037,69.6449026345933,9.46478873239439,84.3137254901962,12.5377366917378,92.4930491195551,21.8815943922934,90.3108907912491,37.5961611326174,89.310276353469,54.8428286068187	0.941
303693	72.1	95	22.9	5.48	123	-455	702	3.91	FALSE	inactive	IC50 larger than highest measured concentration	31.0768	-5.48056	72.0822	3333.51	123.369	50,50,25,25,12.5,6.25,6.25,3.125,3.125,1.5625,1.5625,0.78125,0.78125,0.390625,0.390625,0.1953125,0.1953125	95.817612696507,95.1827242524915,17.9619949323244,94.3057996485062,91.5110954561463,91.7572037276171,92.9985362542561,92.0962199312715,20.5070422535212,104.248366013072,29.0540873334668,91.9369786839666,43.5583642858964,85.7691570081831,59.7911752597438,92.1055964034534,73.6541179359676	0.748
303861	95.4	110	14.3	0.0551	207			3.68	FALSE	inactive	IC50 larger than highest measured concentration	12.4124	-0.0551323	18.266	208.557	207.051	50,50,25,25,12.5,6.25,6.25,3.125,3.125,1.5625,1.5625,0.78125,0.78125,0.390625,0.390625,0.1953125,0.1953125	110.721520370332,105.232558139535,14.887396455034,109.420035149385,104.966537513209,104.48114746838,103.930525640183,101.947308132875,36.056338028169,123.856209150327,49.5082716713449,106.394810009268,71.2341787234796,103.936633749166,87.0894100837551,96.0536406408687,98.4378829980425	0.428
303893	87.8	85.3	2.48	-5.9	102	-3710	3910	3.99	FALSE	inactive	IC50 larger than highest measured concentration	4.96101	5.9029	-85.8193	87.8143	102.421	50,50,25,25,12.5,6.25,6.25,3.125,3.125,1.5625,1.5625,0.78125,0.78125,0.390625,0.390625,0.1953125,0.1953125	80.9151504356007,89.7009966777407,35.3259352662807,90.4393673110722,85.8753082071153,87.6350189038118,89.4964217353812,88.4306987399772,63.5492957746479,96.078431372549,76.3801910647418,88.7859128822984,84.3902760735856,90.3098075738072,87.8268478783117,87.8293485739044,88.11067896441	0.901
303934	74.8	83.6	8.89	5.39	3.7	-4.65	12	5.43	FALSE	inactive	Response Difference lower than 25%	15.1519	-5.38857	74.7619	83.647	3.69952	50,50,25,25,12.5,6.25,6.25,3.125,3.125,1.5625,1.5625,0.78125,0.78125,0.390625,0.390625,0.1953125,0.1953125	79.3450068848418,81.4784053156144,21.9472049698066,82.7065026362039,86.0162028883408,86.0199200958474,85.995190250928,76.7468499427262,24.3380281690141,88.5620915032679,41.292727090082,93.9759036144578,53.5788589283598,86.6768932240565,68.6443677143728,87.2537620590817,78.1742492092627	0.688
303941	83.8	81.7	2.14	-7.01	91.2	-2030	2210	4.04	FALSE	inactive	IC50 larger than highest measured concentration	10.0888	7.00744	-62.2089	83.8062	91.1793	50,50,25,25,12.5,6.25,6.25,3.125,3.125,1.5625,1.5625,0.78125,0.78125,0.390625,0.390625,0.1953125,0.1953125	77.5164745188582,85.797342192691,15.0585284040988,86.0808435852375,86.2275449101796,89.9633228752439,87.281469313508,89.8052691867124,42.2535211267606,94.1176470588236,57.6375808335314,88.4151992585727,71.4382384139871,87.4338652669529,81.2480717787182,85.5261734475217,84.3141788898578	0.991
303949	90.3	94.5	4.17	0.0147	135	-169000	170000	3.87	FALSE	inactive	IC50 larger than highest measured concentration	9.24158	-0.0147249	-7.04346	197.543	135.024	50,50,25,25,12.5,6.25,6.25,3.125,3.125,1.5625,1.5625,0.78125,0.78125,0.390625,0.390625,0.1953125,0.1953125	93.7263552765437,96.09634551495,35.5533335783454,100.91388400703,97.2173300457909,95.8777569030379,93.1401470902968,78.1214203894616,79.6619718309859,108.169934640523,88.7891033380819,75.6255792400371,91.0023420865075,94.0963910887642,95.0812187298242,93.2566357126001,95.2549511763567	0.932
303965	89.8	80	9.83	-7.4	82	-1060	1220	4.09	FALSE	inactive	IC50 larger than highest measured concentration	3.83769	7.40184	-304.048	89.8497	82.0439	50,50,25,25,12.5,6.25,6.25,3.125,3.125,1.5625,1.5625,0.78125,0.78125,0.390625,0.390625,0.1953125,0.1953125	74.9012974281428,85.1328903654485,92.9972910125361,88.1195079086116,87.2138076787602,87.813451309281,88.2100497218091,86.8270332187858,97.0140845070422,93.1372549019608,91.7838014876794,86.5616311399443,89.7066683514613,85.3133194139894,92.1302678805474,90.2965987522539,90.5105920611474	0.0128
303992	94.5	106	11.7	10.7	44.8	-111	200	4.35	FALSE	inactive	Response Difference lower than 25%	8.09031	-10.7197	94.4964	109.851	44.8265	50,50,25,25,12.5,6.25,6.25,3.125,3.125,1.5625,1.5625,0.78125,0.78125,0.390625,0.390625,0.1953125,0.1953125	115.165229827031,97.3421926910298,84.3427689808485,100.773286467487,101.0919337795,96.9521973641883,94.2122903054672,83.1615120274915,97.5774647887321,94.7712418300654,78.3483844146249,101.760889712697,93.6606601513874,96.5178744418052,99.3847986881999,96.9573772596255,98.1574802192073	0.234
304045	90.4	82.4	7.99	-3.17	3.36	-0.818	7.55	5.47	FALSE	inactive	Response Difference lower than 25%	3.92358	3.16796	82.4151	90.403	3.36373	50,50,25,25,12.5,6.25,6.25,3.125,3.125,1.5625,1.5625,0.78125,0.78125,0.390625,0.390625,0.1953125,0.1953125	82.7450431902134,85.7142857142853,71.1347447939032,86.9947275922672,85.4526241634377,83.1529390649254,84.2085559993706,84.306987399771,88.4507042253519,92.483660130719,89.3023418245126,89.8980537534754,89.0929818319261,87.8879795606717,91.084934510957,92.845284714343,89.7845287326632	0.00647
304164									FALSE	inconclusive	Fit did not converge						50,50,25,25,12.5,6.25,6.25,3.125,3.125,1.5625,1.5625,0.78125,0.78125,0.390625,0.390625,0.1953125,0.1953125	117.779301601985,89.1196013289034,33.9024277574799,92.688927943761,92.3564635435013,88.8881248630578,90.3533601667354,106.300114547537,56.6760563380282,85.9477124183007,72.3579585218489,91.1955514365152,79.0048293757278,91.2191686158432,86.842657743247,90.0490018767674,89.1145132895471
304412	90.8	81.1	9.66	-12.5	6.24	4.59	7.88	5.2	FALSE	inactive	Response Difference lower than 25%	4.85836	12.5139	81.1114	90.7687	6.23561	50,50,25,25,12.5,6.25,6.25,3.125,3.125,1.5625,1.5625,0.78125,0.78125,0.390625,0.390625,0.1953125,0.1953125	82.4841036463092,73.4219269102989,87.7595943267435,80.3163444639718,81.5780204297288,88.1707823054723,83.5657998909221,96.4490263459336,90.704225352113,100.980392156863,91.4419764189683,88.4151992585727,86.0257684936712,87.4335698440144,88.3799162269705,89.8027956944675,88.0543769759352	0.00728
304518	93.5	95.8	2.32	0.028	157			3.8	FALSE	inactive	IC50 larger than highest measured concentration	3.69311	-0.0280403	66.2763	126.286	156.855	50,50,25,25,12.5,6.25,6.25,3.125,3.125,1.5625,1.5625,0.78125,0.78125,0.390625,0.390625,0.1953125,0.1953125	130.329141777577,94.4352159468438,90.8337854792607,100.281195079086,94.6107784431137,94.0852163332663,91.5678810636288,120.045819014891,100.169014084507,100.326797385621,92.8112524004144,96.3855421686747,91.5475727315956,92.4296641065805,94.9585523649417,90.9537815154146,92.4083792677639	0.848
400393	91.4	89	2.41	-0.0152	0.0133	-0.909	0.936	7.88	FALSE	inconclusive	IC50 lower than lowest measured concentration	4.66537	0.015185	35.162	149.934	0.0133005	50,50,25,25,12.5,6.25,6.25,3.125,3.125,1.5625,1.5625,0.78125,0.78125,0.390625,0.390625,0.1953125,0.1953125	88.2348064783407,86.1295681063123,91.0048248545133,87.5571177504394,85.1708348009862,98.5664803479603,86.1377305968872,117.983963344788,99.2676056338026,113.071895424837,90.757324514818,89.1566265060241,88.2072231144982,93.7931886794921,89.2408401616277,91.8588553391588,87.7752084121922	0.887
400401	94.1	75.3	18.9	-2.99	100	-1710	1910	4	FALSE	inactive	IC50 larger than highest measured concentration	3.22719	2.98845	-76.6336	94.1345	100.457	50,50,25,25,12.5,6.25,6.25,3.125,3.125,1.5625,1.5625,0.78125,0.78125,0.390625,0.390625,0.1953125,0.1953125	38.5565596451766,75.249169435216,92.1433161105926,90.931458699473,93.6949630151463,93.0106010526461,92.3541070279546,102.634593356243,97.4647887323943,93.1372549019608,91.5276831278275,95.4587581093605,91.9565788467357,89.8568257346863,95.0200954898169,92.4347092949786,94.6973400577485	0.000118
400409	86.8	77.5	9.28	-6.51	5.27	2.56	7.99	5.28	FALSE	inactive	Response Difference lower than 25%	2.29938	6.51239	77.5281	86.8045	5.27193	50,50,25,25,12.5,6.25,6.25,3.125,3.125,1.5625,1.5625,0.78125,0.78125,0.390625,0.390625,0.1953125,0.1953125	55.2925707051362,74.7508305647839,78.4800139156953,77.5043936731108,79.464600211342,77.5971180427677,81.9936500529935,88.2016036655212,84.9577464788731,90.8496732026145,87.5054505849346,84.5227062094532,86.7754578596231,83.8007047314201,88.3186730198579,85.1980233435876,87.3290941069948	6.6e-06
400413	91.3	95	3.72	-7.86	5.42	-3.36	14.2	5.27	FALSE	inactive	Response Difference lower than 25%	6.68942	7.86154	94.9953	91.2766	5.42045	50,50,25,25,12.5,6.25,6.25,3.125,3.125,1.5625,1.5625,0.78125,0.78125,0.390625,0.390625,0.1953125,0.1953125	129.282747848992,94.0199335548174,91.2328156389754,98.242530755712,96.1606199365975,96.4170749672502,92.3552224398567,73.7686139747995,100.507042253521,90.8496732026145,85.1945138801737,91.7516218721038,92.2293826002813,94.3987564663775,97.6641504899358,90.5436072575466,95.7026627010852	0.734
400465	94.4	93.8	0.616	-0.0262	0.132	-40.8	41.1	6.88	FALSE	inconclusive	IC50 lower than lowest measured concentration	3.43006	0.0261843	85.9248	102.937	0.132477	50,50,25,25,12.5,6.25,6.25,3.125,3.125,1.5625,1.5625,0.78125,0.78125,0.390625,0.390625,0.1953125,0.1953125	91.1121984772999,90.1162790697672,97.040470771161,92.4780316344463,93.8358576963719,93.7286428881107,94.9278270405125,97.8235967926689,95.7746478873238,102.287581699346,93.5816666671309,90.4541241890639,94.1382108143877,91.3708682947923,95.5122205491254,90.9546105825064,94.3631400210667	0.994
400489	102	90.6	11.5	-5.95	69.9	-240	380	4.16	FALSE	inactive	IC50 larger than highest measured concentration	4.55102	5.94919	6.29132	102.047	69.9157	50,50,25,25,12.5,6.25,6.25,3.125,3.125,1.5625,1.5625,0.78125,0.78125,0.390625,0.390625,0.1953125,0.1953125	87.9736968858578,93.1063122923589,101.252912487846,106.186291739895,103.76893272279,104.839410835077,101.286627628799,95.9908361970217,110.422535211268,103.267973856209,94.3526652977714,99.7219647822057,100.750343332369,102.120078099978,105.779905150008,96.3815500479053,104.242451027752	0.0145
400497	92.7	80	12.7	0.341	130000	-1220000	1480000	0.886	FALSE	inactive	IC50 larger than highest measured concentration	5.74747	-0.340576	95.1465	-140.524	130140	50,50,25,25,12.5,6.25,6.25,3.125,3.125,1.5625,1.5625,0.78125,0.78125,0.390625,0.390625,0.1953125,0.1953125	200.414323361826,73.3388704318937,94.8762061326262,87.9086115992969,76.7171539274393,82.4353051415569,83.9224528465428,87.9725085910652,93.6338028169012,96.078431372549,90.757797571328,92.678405931418,91.3431361790848,88.7970451797687,93.4215538099454,91.1186054021745,92.1856215938271	0.0621
400532	94.7	49.5	45.2	-0.808	348	-1680	2380	3.46	FALSE	inactive	IC50 larger than highest measured concentration	5.37648	0.808465	-170.454	95.3381	348.186	50,50,25,25,12.5,6.25,6.25,3.125,3.125,1.5625,1.5625,0.78125,0.78125,0.390625,0.390625,0.1953125,0.1953125	18.4262939315189,46.5116279069767,7.54347891089871,73.4270650263622,78.266995420923,84.5858177122422,87.7096712950836,75.8304696449026,88.1126760563383,98.3660130718953,91.7844693321643,96.7562557924003,94.0014320756118,91.8250810628239,97.1105222947867,93.0920525227376,96.4834670989566	7.13e-07
400594	90.7	69.5	21.2	-1.56	8.57	-0.716	17.8	5.07	FALSE	inactive	Response Difference lower than 25%	3.28431	1.55938	68.1036	90.7152	8.56597	50,50,25,25,12.5,6.25,6.25,3.125,3.125,1.5625,1.5625,0.78125,0.78125,0.390625,0.390625,0.1953125,0.1953125	65.7520887279474,71.1794019933554,26.1031211168179,74.1300527240772,77.5625220147939,78.1360281948839,81.8504125745962,87.7434135166094,87.4366197183099,97.0588235294117,87.0776683656819,86.5616311399443,90.1841303410489,91.2187747185909,88.9331445317693,88.89804279992,92.1849318853932	1.85e-07
400735	95.4	64.5	30.9	-1.47	260	-1680	2200	3.59	FALSE	inactive	IC50 larger than highest measured concentration	7.28324	1.47026	-284.073	95.3891	259.91	50,50,25,25,12.5,6.25,6.25,3.125,3.125,1.5625,1.5625,0.78125,0.78125,0.390625,0.390625,0.1953125,0.1953125	58.1703878255421,69.186046511628,89.9792366196821,83.620386643234,88.7636491722435,89.0685968290077,90.282159707,76.0595647193585,104.56338028169,96.4052287581699,101.711615846948,92.1223354958294,97.5458857199226,93.4894446614985,99.3847187101297,97.0399362955546,99.6649106024428	0.000103
400796									FALSE	inconclusive	Fit did not converge						50,50,25,25,12.5,6.25,6.25,3.125,3.125,1.5625,1.5625,0.78125,0.78125,0.390625,0.390625,0.1953125,0.1953125	84.052631735571,87.6245847176076,175.548914104555,88.2601054481548,88.1296231067277,89.4264522836082,90.4247930039504,95.0744558991982,137.12676056338,89.5424836601307,111.210980142479,91.3809082483781,102.52203811405,90.6134531174877,98.7087440623782,92.023331552622,96.0364089822182
400803	97.8	99.2	1.33	0.117	0.606			6.22	FALSE	inactive	Response Difference lower than 25%	8.39179	-0.116637	93.9291	102.313	0.606279	50,50,25,25,12.5,6.25,6.25,3.125,3.125,1.5625,1.5625,0.78125,0.78125,0.390625,0.390625,0.1953125,0.1953125	109.411381096295,90.6146179401993,96.3562947553881,103.163444639719,101.0919337795,102.86616520673,96.4267547346329,84.7651775486827,107.154929577465,104.248366013072,80.402117512246,102.873030583874,96.6598166455511,97.1231468057523,102.889657655871,96.7103420102338,101.674049420695	0.996
401020	93.6	88	5.6	-8.51	5.31	0.917	9.71	5.27	FALSE	inactive	Response Difference lower than 25%	4.00306	8.51362	87.9898	93.594	5.31447	50,50,25,25,12.5,6.25,6.25,3.125,3.125,1.5625,1.5625,0.78125,0.78125,0.390625,0.390625,0.1953125,0.1953125	85.6203946062291,89.6179401993356,83.4330276144904,91.3532513181019,90.0317013032757,87.2750073424175,90.7821663297578,101.030927835052,90.1408450704224,99.0196078431373,88.7035079366365,92.4930491195551,90.5245697399763,90.6139454890521,93.4825570828478,97.5329102862486,92.3525854855032	0.0568
401029	94.1	98.1	3.95	1.53	964			3.02	FALSE	inactive	IC50 larger than highest measured concentration	6.35301	-1.5346	94.143	468.074	963.687	50,50,25,25,12.5,6.25,6.25,3.125,3.125,1.5625,1.5625,0.78125,0.78125,0.390625,0.390625,0.1953125,0.1953125	112.026218089853,84.5514950166113,94.0222312306827,96.4147627416521,95.1039098274041,90.6801409744202,89.3530913059914,99.1981672394044,97.9154929577464,96.7320261437908,98.2881337113705,93.0491195551436,90.4564020541195,90.7653005079059,95.4498976380676,91.200014441814,96.8179393889673	0.832
401123	89.9	82.3	7.59	-10.4	3.47	0.317	6.62	5.46	FALSE	inactive	Response Difference lower than 25%	3.96412	10.4449	82.2863	89.8717	3.46722	50,50,25,25,12.5,6.25,6.25,3.125,3.125,1.5625,1.5625,0.78125,0.78125,0.390625,0.390625,0.1953125,0.1953125	87.4502023365526,74.1694352159466,89.2967454472893,80.3163444639718,81.0848890454385,82.0783820574618,81.6360443497069,84.5360824742268,91.3802816901408,94.1176470588236,90.4148594284754,88.4151992585727,88.5479950387226,86.8281497685979,89.547736010786,91.2010307176043,89.8962251985157	0.00616
401124	96.2	19.7	76.5	-1.79	13.4	0.612	26.3	4.87	TRUE	active		10.4644	1.78567	12.3617	96.2838	13.4494	50,50,25,25,12.5,6.25,6.25,3.125,3.125,1.5625,1.5625,0.78125,0.78125,0.390625,0.390625,0.1953125,0.1953125	-140.288206833487,19.0199335548173,87.8731823942014,32.3725834797892,65.4455794293764,57.5212580475228,78.4908616394279,114.089347079038,96.5633802816901,91.1764705882352,91.7840241025077,98.6098239110287,92.8425149109885,92.5813637855296,96.6796404425908,91.8588820832584,95.8133427545083	7.22e-07
401164	92.8	55.3	37.5	-0.783	596	-6470	7660	3.22	FALSE	inactive	IC50 larger than highest measured concentration	10.0742	0.783257	-209.707	93.3638	595.722	50,50,25,25,12.5,6.25,6.25,3.125,3.125,1.5625,1.5625,0.78125,0.78125,0.390625,0.390625,0.1953125,0.1953125	41.9554056104978,62.3754152823918,90.7769636733879,68.7873462214413,70.8700246565691,79.3897168856958,70.4178588599607,84.5360824742268,99.7183098591547,102.287581699346,92.6398668095488,89.8980537534754,90.5929812777174,90.0082792278532,90.2244304611677,98.0263924148383,89.1711964326827	0.000353
401183	85.9	85.8	0.14	-1.49	3500	-57000	64000	2.46	FALSE	inactive	IC50 larger than highest measured concentration	16.0516	1.48645	8.59868	85.8974	3495.31	50,50,25,25,12.5,6.25,6.25,3.125,3.125,1.5625,1.5625,0.78125,0.78125,0.390625,0.390625,0.1953125,0.1953125	83.0073431227466,82.2259136212626,4.81082958077673,93.6731107205626,92.4269108841141,91.0391036189959,92.0686312943215,97.3654066437572,19.7183098591549,98.3660130718953,34.0178414654067,95.0880444856348,47.3072766510713,93.793090205179,66.2465651918246,90.9543698856089,78.6206357677891	1
401319	89.2	74.6	14.7	-0.769	3.02	-7.36	13.4	5.52	FALSE	inactive	Response Difference lower than 25%	5.32604	0.768982	72.6399	91.258	3.01963	50,50,25,25,12.5,6.25,6.25,3.125,3.125,1.5625,1.5625,0.78125,0.78125,0.390625,0.390625,0.1953125,0.1953125	69.935623859346,77.8239202657807,28.9497288096461,77.9964850615116,77.7738640366327,77.2403115049856,79.0640671682458,91.8671248568157,71.8873239436619,92.156862745098,78.9472183025011,86.5616311399443,84.1855069957779,88.6452962636632,87.9499941116146,90.3784089533898,88.1104611617468	0.00557
401390	93.1	86	7.07	-0.103	0.344	-5.81	6.5	6.46	FALSE	inactive	Response Difference lower than 25%	7.56365	0.102863	67.1149	117.646	0.343606	50,50,25,25,12.5,6.25,6.25,3.125,3.125,1.5625,1.5625,0.78125,0.78125,0.390625,0.390625,0.1953125,0.1953125	95.0336037247441,78.2392026578072,36.2939796195051,89.3145869947278,93.06093694963,91.2186432144403,94.7843107091391,76.5177548682703,81.4647887323942,90.5228758169934,78.7763614218524,97.126969416126,88.8892103300093,96.0645971797454,97.9098831100513,92.1059975649498,96.0932373271294	0.602
401406	91.6	82	9.61	-0.0864	77.2			4.11	FALSE	inactive	IC50 larger than highest measured concentration	4.23911	0.0863846	40.1381	122.296	77.2372	50,50,25,25,12.5,6.25,6.25,3.125,3.125,1.5625,1.5625,0.78125,0.78125,0.390625,0.390625,0.1953125,0.1953125	83.0075981956146,82.3920265780729,14.1469911057858,82.565905096661,84.1845720324055,82.0800719790028,84.1378667700901,92.5544100801832,54.7605633802817,92.483660130719,67.4799945793292,91.3809082483781,79.6867722545325,92.1277418633755,87.7042215024643,93.3394354454261,92.8554373845019	0.0355
401687	100	101	0.644	-0.108	7.32			5.14	FALSE	inactive	Response Difference lower than 25%	7.31739	0.108276	102.992	98.6619	7.32446	50,50,25,25,12.5,6.25,6.25,3.125,3.125,1.5625,1.5625,0.78125,0.78125,0.390625,0.390625,0.1953125,0.1953125	100.523707110029,100.415282392027,85.6537437636494,110.263620386643,105.600563578725,101.972488077312,106.07439379106,97.3654066437572,100.394366197183,113.398692810457,94.6090619261584,102.687673772011,90.457200114832,101.212144935479,101.476165235492,98.6030219495513,101.507920439228	0.999
401751	87.9	83.7	4.22	-0.0419	29.4	-10100	10200	4.53	FALSE	inactive	Response Difference lower than 25%	9.74239	0.0419251	47.7179	120.506	29.3711	50,50,25,25,12.5,6.25,6.25,3.125,3.125,1.5625,1.5625,0.78125,0.78125,0.390625,0.390625,0.1953125,0.1953125	79.6076469145324,85.548172757475,30.5442201494122,85.1669595782073,86.1570975695668,88.7094593649621,89.3537187251865,85.9106529209622,46.1971830985916,101.633986928104,61.7457983538194,91.9369786839666,77.5052289602932,91.6721504549637,85.060166502345,92.0235722495195,87.8868504273786	0.937
401813	94.9	78.2	16.7	-0.796	18.3	-176	212	4.74	FALSE	inactive	Response Difference lower than 25%	8.46986	0.795707	70.3614	95.5509	18.3091	50,50,25,25,12.5,6.25,6.25,3.125,3.125,1.5625,1.5625,0.78125,0.78125,0.390625,0.390625,0.1953125,0.1953125	71.5032166814254,86.2126245847175,65.7278787238624,92.5483304042182,88.5523071504052,91.5767317616671,90.2822061824955,78.3505154639175,88.7887323943661,107.18954248366,87.3340093403621,94.1612604263207,90.3888107454439,95.9124051292318,96.2497183272348,91.9406655402942,95.3667202430967	0.044
401928	88.2	78.9	9.29	-0.858	38.4	-111	188	4.42	FALSE	inactive	Response Difference lower than 25%	2.016	0.85812	71.3124	88.3479	38.4372	50,50,25,25,12.5,6.25,6.25,3.125,3.125,1.5625,1.5625,0.78125,0.78125,0.390625,0.390625,0.1953125,0.1953125	69.6728988053662,77.4916943521595,84.400646128179,80.9490333919158,84.3254667136315,81.7195359591992,84.637408637889,85.6815578465063,90.0281690140845,103.59477124183,88.1900468353775,86.3762743280816,88.4797386794531,86.5250950707946,88.8720012972443,88.5697857195866,88.2219216747137	0.000175
401956	93.5	91.2	2.34	-0.017	662	-237000	238000	3.18	FALSE	inactive	IC50 larger than highest measured concentration	7.40616	0.0169552	40.2518	139.965	662.229	50,50,25,25,12.5,6.25,6.25,3.125,3.125,1.5625,1.5625,0.78125,0.78125,0.390625,0.390625,0.1953125,0.1953125	89.5427351208556,92.6910299003319,55.2493933869527,100.843585237258,94.1176470588234,94.26528038712,95.1411030912479,76.0595647193585,79.6619718309859,98.0392156862745,94.3514130893626,88.0444856348471,89.5020987888319,98.1834689693899,95.3887943925776,96.1349159600094,97.4318343458284	0.974
401982	88.5	77.9	10.6	-10.8	2.35	-0.596	5.3	5.63	FALSE	inactive	Response Difference lower than 25%	8.16758	10.792	77.8982	88.4577	2.34933	50,50,25,25,12.5,6.25,6.25,3.125,3.125,1.5625,1.5625,0.78125,0.78125,0.390625,0.390625,0.1953125,0.1953125	79.0860228995919,73.3388704318937,16.0259987996879,73.4270650263622,80.1690736174711,81.5400546369114,81.3501503366105,90.7216494845361,64.3380281690141,103.921568627451,78.5192412952736,86.1909175162187,84.3894558445201,89.856333363122,87.2118565089452,91.3651860018707,86.1004874332853	0.0741
402186	101	108	6.79	1.57	376			3.42	FALSE	inactive	IC50 larger than highest measured concentration	7.0828	-1.56732	101.376	268.461	375.908	50,50,25,25,12.5,6.25,6.25,3.125,3.125,1.5625,1.5625,0.78125,0.78125,0.390625,0.390625,0.1953125,0.1953125	116.994952533065,98.9202657807308,257.872657500687,105.553602811951,102.57132793237,101.613000974327,99.1423179607111,87.9725085910652,162.478873239436,104.575163398693,98.1170820427471,102.316960148285,110.36096729392,100.302931604913,109.59092016969,96.7108234040293,103.348715948936	0.575
402538	91	26.1	64.9	-23	3.83	-6.08	13.7	5.42	TRUE	active		5.05632	22.9887	26.1143	90.9969	3.83085	50,50,25,25,12.5,6.25,6.25,3.125,3.125,1.5625,1.5625,0.78125,0.78125,0.390625,0.390625,0.1953125,0.1953125	28.6281883577091,28.7375415282391,74.2648875584593,35.3251318101934,14.7234941880944,27.2390877686975,22.0436995145402,88.8888888888889,91.9436619718307,51.3071895424837,87.5907677178448,94.7173308619092,89.8430037231749,91.6732829095617,89.4864128256032,91.6116061369686,92.0174416372804	5.82e-13
403944	87.4	91.8	4.36	0.0173	1990	-1330000	1340000	2.7	FALSE	inactive	IC50 larger than highest measured concentration	18.7502	-0.0173155	3.65117	185.712	1992.63	50,50,25,25,12.5,6.25,6.25,3.125,3.125,1.5625,1.5625,0.78125,0.78125,0.390625,0.390625,0.1953125,0.1953125	105.490911116033,83.6378737541527,9.59298905194326,96.7662565905096,96.9355406833394,92.4721570857824,93.5686976380918,110.652920962199,40.6760563380282,100.653594771242,66.1959244233789,95.4587581093605,75.4601762162388,95.1552361377094,88.3181531624028,96.6281039035019,92.7989357435858	0.99
404075	91	76	15	-0.939	295	-1290	1880	3.53	FALSE	inactive	IC50 larger than highest measured concentration	4.04637	0.938695	-3.87696	91.0937	294.947	50,50,25,25,12.5,6.25,6.25,3.125,3.125,1.5625,1.5625,0.78125,0.78125,0.390625,0.390625,0.1953125,0.1953125	73.8571141310793,74.8338870431891,91.7447303051759,83.6906854130054,82.564283198309,81.3608646804064,85.5659193329463,90.7216494845361,91.4929577464786,94.1176470588236,90.8426416477286,87.6737720111214,90.8656076844379,89.553081716693,94.2822378103924,92.9277635179724,90.3425210059325	0.000378
404118									FALSE	inconclusive	Fit did not converge						50,50,25,25,12.5,6.25,6.25,3.125,3.125,1.5625,1.5625,0.78125,0.78125,0.390625,0.390625,0.1953125,0.1953125	124.322090713265,83.8039867109636,92.2005082117135,83.268892794376,86.7206762944699,88.3513125445787,87.781057656803,103.550973654066,99.1549295774647,89.2156862745099,95.5502217661092,95.8294717330861,93.5924037921183,93.6410951032916,94.7739629793511,95.3947729994243,95.5898772219161
404241	96	89.1	6.93	-0.0262	1.18	-344	346	5.93	FALSE	inactive	Response Difference lower than 25%	8.08866	0.0261714	-1.79911	189.329	1.18032	50,50,25,25,12.5,6.25,6.25,3.125,3.125,1.5625,1.5625,0.78125,0.78125,0.390625,0.390625,0.1953125,0.1953125	84.3141664495005,82.7242524916942,92.2004896969512,86.0105448154656,86.7206762944699,99.1029430274996,85.6375148343971,113.172966781214,100.169014084507,101.960784313725,92.1264057082898,91.0101946246525,91.8880121305226,93.6424737436709,91.4540333040679,95.0659275488967,87.831183696672	0.646
404376	93.1	27.3	65.8	-11.2	5.77	3.32	8.22	5.24	TRUE	active		11.6226	11.2492	27.3132	93.1434	5.77076	50,50,25,25,12.5,6.25,6.25,3.125,3.125,1.5625,1.5625,0.78125,0.78125,0.390625,0.390625,0.1953125,0.1953125	24.9683178241945,30.4817275747508,214.148694463929,23.2337434094903,30.7854878478337,48.3865911135765,44.1940138167001,74.2268041237113,117.633802816902,71.8954248366014,103.765599386251,91.566265060241,96.8642088613555,92.7336050732002,97.4182379191624,90.3783822092898,94.864812155639	7.58e-08
404882	92.8	79.4	13.5	-13.4	5.77	-0.823	12.4	5.24	FALSE	inactive	Response Difference lower than 25%	2.83795	13.4179	79.3517	92.8493	5.76855	50,50,25,25,12.5,6.25,6.25,3.125,3.125,1.5625,1.5625,0.78125,0.78125,0.390625,0.390625,0.1953125,0.1953125	70.1957131603571,80.3156146179403,95.1039747399394,79.3321616871707,78.4078901021485,81.0027761331796,84.5661849404054,92.7835051546392,93.4084507042255,100.326797385621,92.7256569989685,90.8248378127896,93.3879229029017,88.6465271925739,92.6221730001635,92.1873798604892,91.5713091818614	2.84e-06
404993	98.4	82.5	15.9	0.143	520			3.28	FALSE	inactive	IC50 larger than highest measured concentration	5.122	-0.143342	120.922	28.7244	519.939	50,50,25,25,12.5,6.25,6.25,3.125,3.125,1.5625,1.5625,0.78125,0.78125,0.390625,0.390625,0.1953125,0.1953125	106.014575713917,83.970099667774,151.187985844723,85.377855887522,87.3547023599858,89.605933605896,86.6387596805551,78.1214203894616,127.549295774648,98.3660130718953,96.5776726788442,95.6441149212234,100.068622137096,96.6702142037869,98.5867175220553,94.9015048236326,96.9859922939603	0.00943
405065	95.4	96.5	1.04	0.0294	669	-353000	355000	3.17	FALSE	inactive	IC50 larger than highest measured concentration	3.72567	-0.0293808	84.1704	109.755	668.833	50,50,25,25,12.5,6.25,6.25,3.125,3.125,1.5625,1.5625,0.78125,0.78125,0.390625,0.390625,0.1953125,0.1953125	94.5090888839669,94.1029900332226,104.0431427291,95.0087873462216,92.3564635435013,97.4916902478705,94.6416541744405,103.550973654066,92.9577464788734,98.3660130718953,93.1538287941708,95.0880444856348,95.2286942729169,92.5816592084689,96.4351074935254,95.3950136963219,96.0930013742439	0.98
405165	105	25.6	79.5	-15.7	6.15	4.55	7.74	5.21	TRUE	active		9.58879	15.6612	25.5976	105.052	6.1484	50,50,25,25,12.5,6.25,6.25,3.125,3.125,1.5625,1.5625,0.78125,0.78125,0.390625,0.390625,0.1953125,0.1953125	15.5554488028367,23.2558139534884,162.910496583517,29.9824253075571,33.6033814723494,68.1010992648257,52.4128102268397,101.030927835052,121.915492957747,119.607843137255,105.135348424207,91.9369786839666,103.477028598284,102.574389342322,106.148923965049,95.3952009050203,103.293974879548	4.77e-10
405412	95.3	63	32.2	-1.06	345	-1870	2560	3.46	FALSE	inactive	IC50 larger than highest measured concentration	4.45125	1.05727	-186.016	95.3675	344.816	50,50,25,25,12.5,6.25,6.25,3.125,3.125,1.5625,1.5625,0.78125,0.78125,0.390625,0.390625,0.1953125,0.1953125	55.8174256430706,68.6046511627907,83.7736251840018,80.8084358523726,80.9439943642125,87.9924081731596,88.2101659105489,95.53264604811,96.7887323943665,101.307189542484,94.6087558307697,92.678405931418,95.0243242254655,92.7328665158536,97.7867968603009,93.1748789996638,94.3064024272654	7.48e-08
405479	101	37.3	63.9	-1	37.4	-149	223	4.43	TRUE	active		13.6311	1.00368	-10.9192	101.789	37.4459	50,50,25,25,12.5,6.25,6.25,3.125,3.125,1.5625,1.5625,0.78125,0.78125,0.390625,0.390625,0.1953125,0.1953125	25.7515615773536,44.6013289036544,193.480017155779,66.5377855887521,72.9834448749559,69.7131095954909,84.7802975500673,69.4158075601375,122.929577464789,103.59477124183,106.332682277717,95.2734012974977,101.704203230594,96.5177267303351,105.59489587955,93.9966716967859,100.390737978042	3.39e-05
405662									FALSE	inconclusive	Fit did not converge						50,50,25,25,12.5,6.25,6.25,3.125,3.125,1.5625,1.5625,0.78125,0.78125,0.390625,0.390625,0.1953125,0.1953125	99.2153533460671,88.7873754152822,142.584786734469,91.2829525483305,91.0179640718564,90.3214696956274,89.5676919083604,84.9942726231387,106.816901408451,155.555555555556,96.4914094329139,93.0491195551436,94.8192447907142,92.4305011382402,94.7739629793511,95.3127755895905,90.2309697418557
405725	97.7	64.3	33.5	-1.44	184	-1160	1530	3.74	FALSE	inactive	IC50 larger than highest measured concentration	11.3168	1.43956	-154.862	97.7292	184.453	50,50,25,25,12.5,6.25,6.25,3.125,3.125,1.5625,1.5625,0.78125,0.78125,0.390625,0.390625,0.1953125,0.1953125	58.9536315787012,66.9435215946845,99.089036659322,79.9648506151143,86.5797816132439,88.5294535842651,92.0686080565737,69.8739977090493,109.521126760563,112.418300653595,104.963990660195,88.6005560704356,101.090450205999,97.7296008614536,100.737307830193,98.0261517179408,101.227662862168	0.00387
405726	93.9	91.2	2.7	-0.0226	0.1	-16.9	17.1	7	FALSE	inconclusive	IC50 lower than lowest measured concentration	4.07938	0.0225521	51.009	137.444	0.100479	50,50,25,25,12.5,6.25,6.25,3.125,3.125,1.5625,1.5625,0.78125,0.78125,0.390625,0.390625,0.1953125,0.1953125	85.0976652755276,96.8438538205977,88.2718792881925,91.7750439367313,91.2293060936947,88.3512542714221,91.2826609452231,98.5108820160366,98.9295774647891,115.359477124183,94.0087532150452,91.566265060241,95.6372570209944,91.0670258024857,94.6509567076709,93.174745279165,90.7894520711173	0.797
405738	97	69.2	27.8	-3.3	76.7			4.12	FALSE	inactive	IC50 larger than highest measured concentration	9.13717	3.29722	-44.7213	97.0308	76.6786	50,50,25,25,12.5,6.25,6.25,3.125,3.125,1.5625,1.5625,0.78125,0.78125,0.390625,0.390625,0.1953125,0.1953125	64.7055247507831,73.7541528239201,107.971475416422,78.4182776801405,102.359985910532,92.2951232360714,90.8539709709405,85.6815578465063,106.704225352112,99.3464052287581,82.7983435230636,99.9073215940686,100.340694334988,97.1226051970309,103.442765993565,99.5888629545412,101.283347743097	0.00341
405758	95.1	89.6	5.46	-3.15	6.42	-16.2	29	5.19	FALSE	inactive	Response Difference lower than 25%	8.07038	3.14745	89.603	95.0699	6.41619	50,50,25,25,12.5,6.25,6.25,3.125,3.125,1.5625,1.5625,0.78125,0.78125,0.390625,0.390625,0.1953125,0.1953125	91.1110081372496,97.6744186046511,72.6149630200022,95.2196836555363,92.2155688622754,92.8304787256357,92.4973445063523,96.9072164948454,89.2394366197182,112.745098039216,85.9645942246481,94.7173308619092,92.7059135190376,91.5212385705173,94.9581724691088,96.7102350338345,93.5801938970059	0.626
405782	97	101	3.9	0.126	43.9			4.36	FALSE	inactive	Response Difference lower than 25%	3.91074	-0.125512	89.2076	112.476	43.9003	50,50,25,25,12.5,6.25,6.25,3.125,3.125,1.5625,1.5625,0.78125,0.78125,0.390625,0.390625,0.1953125,0.1953125	126.144501330418,98.5880398671096,84.2865766768981,104.920913884007,98.2740401549839,96.9528966420674,95.7124263624813,108.820160366552,98.2535211267606,99.9999999999999,98.2025939636321,94.9026876737719,96.3189117112085,95.9131929237346,96.4330680527401,98.4375027161978,98.2688681312866	0.633
405788	91.2	50.6	40.6	-0.77	136	-894	1170	3.87	FALSE	inactive	IC50 larger than highest measured concentration	2.52824	0.770157	-38.9034	92.0437	135.725	50,50,25,25,12.5,6.25,6.25,3.125,3.125,1.5625,1.5625,0.78125,0.78125,0.390625,0.390625,0.1953125,0.1953125	50.3239212862134,50.830564784053,79.4462993664897,64.499121265378,71.9267347657625,84.586283897495,79.2776220719564,90.7216494845361,82.8169014084505,85.6209150326797,85.6217673892099,88.22984244671,90.0472850972137,90.9156215464748,91.3925101737104,93.3392482367282,90.1195273791107	1.34e-12
405803									FALSE	inconclusive	Fit did not converge						50,50,25,25,12.5,6.25,6.25,3.125,3.125,1.5625,1.5625,0.78125,0.78125,0.390625,0.390625,0.1953125,0.1953125	98.1706599032679,81.5614617940201,234.757383941832,84.0421792618629,85.1708348009862,84.0496463984856,85.7086223431409,115.234822451317,133.18309859155,99.9999999999999,111.981283101782,96.9416126042632,104.226097250348,94.3979686718748,101.659914851348,95.3946392789255,101.116184198979
405828	94.5	97.6	3.05	0.0388	40.5			4.39	FALSE	inactive	Response Difference lower than 25%	7.60531	-0.0387758	69.0336	125.894	40.4594	50,50,25,25,12.5,6.25,6.25,3.125,3.125,1.5625,1.5625,0.78125,0.78125,0.390625,0.390625,0.1953125,0.1953125	99.4756126956569,93.7707641196013,94.5915786899156,95.3602811950792,91.0884114124692,105.734603066566,91.9256726688994,113.631156930126,103.887323943662,85.2941176470587,95.8920468348208,93.6051899907321,93.9329762011644,85.9204627898808,96.1263121652044,98.6839495953952,93.2451044994489	0.944
405835	98.9	91.1	7.78	-5.71	52.5	-397	502	4.28	FALSE	inactive	IC50 larger than highest measured concentration	3.22053	5.70717	80.806	98.895	52.5377	50,50,25,25,12.5,6.25,6.25,3.125,3.125,1.5625,1.5625,0.78125,0.78125,0.390625,0.390625,0.1953125,0.1953125	89.5417148293838,92.6910299003319,95.4453314147102,102.038664323375,98.8376188798874,95.3400122140534,99.2139366999098,106.758304696449,100.845070422535,100.326797385621,95.806896663032,100.64874884152,97.2734809967333,95.7604100273444,98.0325694694516,97.5329370303487,99.051360499799	0.0199
405836	91.8	84.2	7.61	-5.27	96.3	-1620	1810	4.02	FALSE	inactive	IC50 larger than highest measured concentration	3.25755	5.27068	-156.7	91.8202	96.3162	50,50,25,25,12.5,6.25,6.25,3.125,3.125,1.5625,1.5625,0.78125,0.78125,0.390625,0.390625,0.1953125,0.1953125	80.1305462938124,88.2890365448506,44.2595303119524,91.9156414762741,92.7087002465657,91.9354613136166,89.5676919083604,110.194730813288,85.5211267605637,97.3856209150327,90.6714786716908,92.8637627432808,91.4790281837359,91.522075602177,93.8515958924063,92.0232780644224,92.0176412897221	0.0259
405850	97.5	105	7.6	1.24	7.81	-31.7	47.4	5.11	FALSE	inactive	Response Difference lower than 25%	5.81853	-1.23813	97.3962	105.859	7.81265	50,50,25,25,12.5,6.25,6.25,3.125,3.125,1.5625,1.5625,0.78125,0.78125,0.390625,0.390625,0.1953125,0.1953125	118.301945908397,93.189368770764,102.277797161705,105.834797891037,101.0919337795,102.508484571599,98.357114457295,76.0595647193585,105.014084507043,95.7516339869282,95.5496930558922,96.2001853568118,100.068333948505,95.9123558920748,100.430351997482,95.8067658560753,99.4423888813916	0.205
405858	97.5	100	2.94	1.73	5.49	-12.5	23.5	5.26	FALSE	inactive	Response Difference lower than 25%	2.45705	-1.72612	97.5285	100.542	5.49498	50,50,25,25,12.5,6.25,6.25,3.125,3.125,1.5625,1.5625,0.78125,0.78125,0.390625,0.390625,0.1953125,0.1953125	97.3860557614797,100.664451827242,105.522824027089,99.0158172231989,99.8238816484676,97.8504780729764,98.2863555147707,99.4272623138602,100.056338028169,100.653594771242,94.010005423454,94.9026876737719,98.1600156065204,98.1833704950777,98.647840762063,98.5205966341216,96.7076586404265	0.223
405885	103	102	1.16	-0.0313	0.00124	-0.00646	0.00893	8.91	FALSE	inconclusive	IC50 lower than lowest measured concentration	4.73091	0.0312953	90.5757	117.801	0.00123751	50,50,25,25,12.5,6.25,6.25,3.125,3.125,1.5625,1.5625,0.78125,0.78125,0.390625,0.390625,0.1953125,0.1953125	95.8169325021926,97.5913621262459,103.70095289002,113.848857644992,102.07819654808,100.179364775974,103.073215404861,99.8854524627721,107.605633802817,228.104575163399,98.03218231264,104.355885078777,101.431931517524,105.147966271564,103.259076361262,103.043291342868,101.563569019713	0.986
405907	91.4	86.5	4.87	-0.0273	0.216	-28.2	28.7	6.67	FALSE	inactive	Response Difference lower than 25%	3.41961	0.0272611	26.7377	155.787	0.215823	50,50,25,25,12.5,6.25,6.25,3.125,3.125,1.5625,1.5625,0.78125,0.78125,0.390625,0.390625,0.1953125,0.1953125	80.1302061966552,91.1960132890366,81.2125706720052,91.4938488576452,87.7069390630501,91.0386374337432,89.7108364357661,87.5143184421535,90.1408450704224,123.856209150327,91.8693134085644,90.2687673772011,88.1391884387605,90.4622458101029,90.9006250486117,90.2145478542205,91.2361290331949	0.236
405921									FALSE	inconclusive	Fit did not converge						50,50,25,25,12.5,6.25,6.25,3.125,3.125,1.5625,1.5625,0.78125,0.78125,0.390625,0.390625,0.1953125,0.1953125	92.4180865368714,91.6943521594682,84.1161112592806,102.671353251318,96.442409299049,96.5948663679971,96.7130205516965,71.9358533791523,94.8732394366196,95.0980392156862,92.2120845902956,96.2001853568118,94.1380334675628,97.2757327535163,95.8804395834661,93.9970461141827,97.5993971948288
405929	88.4	55.3	33.1	-0.907	7.94	0.419	15.5	5.1	TRUE	active		2.32336	0.90715	48.7963	89.7365	7.94051	50,50,25,25,12.5,6.25,6.25,3.125,3.125,1.5625,1.5625,0.78125,0.78125,0.390625,0.390625,0.1953125,0.1953125	54.7720520059568,55.1495016611296,73.9249009761076,59.9297012302286,67.4181049665377,65.7706391865998,73.2763574737128,62.5429553264605,78.9859154929574,64.3790849673203,82.712386372522,83.7812789620018,87.1848851734729,85.6172603806083,88.2566500265627,88.4867987780622,88.1104430115245	4.14e-11
405930									FALSE	inconclusive	Fit did not converge						50,50,25,25,12.5,6.25,6.25,3.125,3.125,1.5625,1.5625,0.78125,0.78125,0.390625,0.390625,0.1953125,0.1953125	97.3850354700079,95.5149501661127,96.4700124261827,105.553602811951,99.119408242339,98.9242192562477,94.2834907652026,67.5830469644903,105.577464788732,96.078431372549,102.567041151186,86.1909175162187,96.523126580188,97.8804142715869,95.880979435439,94.7371890747678,97.7661432838416
405931	89.9	51.8	38.1	-2.56	3.66	1.24	6.08	5.44	TRUE	active		10.0291	2.55847	51.7785	89.9529	3.66041	50,50,25,25,12.5,6.25,6.25,3.125,3.125,1.5625,1.5625,0.78125,0.78125,0.390625,0.390625,0.1953125,0.1953125	69.9588354903287,57.8903654485047,32.2507813461176,46.7838312829525,52.4832687566043,58.6021085558978,62.7723144541349,84.077892325315,64.5633802816902,98.0392156862745,74.9249022790472,89.8980537534754,82.7536530674904,90.6128130344541,91.1464376467971,92.5164927520145,90.3423758041569	1.24e-05
405935	99.3	91.4	7.92	-0.0833	13			4.89	FALSE	inactive	Response Difference lower than 25%	7.33954	0.0832791	58.7641	127.881	13.0134	50,50,25,25,12.5,6.25,6.25,3.125,3.125,1.5625,1.5625,0.78125,0.78125,0.390625,0.390625,0.1953125,0.1953125	86.4061040637784,82.9734219269102,96.6980217254075,101.265377855888,97.8513561113068,96.9524887299713,95.0692752123174,81.0996563573883,105.915492957747,100.980392156863,85.451272257657,100.092678405931,98.3637649400842,95.4572568552284,99.0775029486914,97.8621034100735,101.618527891764	0.465
405946	96.2	90.1	6.14	-0.616	57	-589	703	4.24	FALSE	inactive	IC50 larger than highest measured concentration	4.19134	0.615687	82.9944	96.622	57.0383	50,50,25,25,12.5,6.25,6.25,3.125,3.125,1.5625,1.5625,0.78125,0.78125,0.390625,0.390625,0.1953125,0.1953125	83.7915221430883,93.9368770764117,88.1001363519677,98.6643233743409,95.1039098274041,91.0386374337432,90.2102853525735,99.6563573883162,92.281690140845,100.980392156863,91.7835232191441,94.9026876737719,93.933286558108,94.246613653021,96.2492184642971,97.2038241388234,97.3758409111264	0.195
405956	99.2	101	2.12	0.0302	898			3.05	FALSE	inactive	IC50 larger than highest measured concentration	5.73962	-0.0301606	76.9046	127.925	897.672	50,50,25,25,12.5,6.25,6.25,3.125,3.125,1.5625,1.5625,0.78125,0.78125,0.390625,0.390625,0.1953125,0.1953125	107.057823743798,96.09634551495,141.105235039817,98.6643233743409,99.2603029235645,95.5184446195226,93.9259547751598,107.216494845361,112.56338028169,98.6928104575163,105.733597948159,96.3855421686747,99.3181347104315,96.0633662508343,98.9544966770111,98.5200617521264,98.6039938292875	0.961
406005	98.5	97.7	0.744	0.453	72100			1.14	FALSE	inactive	IC50 larger than highest measured concentration	5.83884	-0.453102	98.5212	75.7761	72079.7	50,50,25,25,12.5,6.25,6.25,3.125,3.125,1.5625,1.5625,0.78125,0.78125,0.390625,0.390625,0.1953125,0.1953125	106.01304527671,92.1926910299003,272.219543238959,96.4850615114236,93.6949630151463,96.5938174511785,90.5676354406331,98.9690721649484,106.478873239437,105.882352941176,103.508256644844,94.1612604263207,100.95407049758,93.0359212136565,101.229592845642,94.8190527641028,97.0412234193401	0.998
406029	99.4	102	2.34	0.0286	53.7			4.27	FALSE	inactive	IC50 larger than highest measured concentration	5.44725	-0.0285631	72.1244	131.376	53.7104	50,50,25,25,12.5,6.25,6.25,3.125,3.125,1.5625,1.5625,0.78125,0.78125,0.390625,0.390625,0.1953125,0.1953125	130.588125762827,99.2524916943521,97.3808831930485,106.397188049209,100.035223670306,97.8487881514353,93.9975038011147,114.54753722795,104.450704225352,102.287581699346,98.6301813949104,102.687673772011,97.8865911390877,95.1549899519272,99.2003292697143,99.0951668731535,98.1574439187635	0.946
406044	104	38.8	65.5	2.5	12.8	-3.67	29.2	4.89	TRUE	active		15.8821	-2.50256	104.331	36.6258	12.7708	50,50,25,25,12.5,6.25,6.25,3.125,3.125,1.5625,1.5625,0.78125,0.78125,0.390625,0.390625,0.1953125,0.1953125	43.00469036492,27.4916943521594,142.130304861301,57.891036906854,68.5452624163439,95.339779121427,78.1346502010183,110.194730813288,146.478873239436,99.0196078431373,114.036518849493,95.6441149212234,103.272636382479,93.0362166365948,99.3852185730675,96.7930080225616,95.7571315171434	4.98e-05
406046	98.4	70.3	28.1	-2.3	141	-488	769	3.85	FALSE	inactive	IC50 larger than highest measured concentration	4.26385	2.29944	-231.526	98.3831	140.512	50,50,25,25,12.5,6.25,6.25,3.125,3.125,1.5625,1.5625,0.78125,0.78125,0.390625,0.390625,0.1953125,0.1953125	66.0139635390341,74.2524916943523,96.6979476663576,91.0720562390158,90.9475167312432,94.8024423445386,93.5690229665635,107.445589919817,102.197183098591,99.0196078431373,98.8877189242919,99.9073215940686,97.8189998304121,95.9128482636393,98.8320302573034,96.464430013031,98.4367576842821	4.14e-07
406108	91.3	88.7	2.59	-0.0376	9.14			5.04	FALSE	inactive	Response Difference lower than 25%	3.29089	0.03757	64.5631	114.421	9.13798	50,50,25,25,12.5,6.25,6.25,3.125,3.125,1.5625,1.5625,0.78125,0.78125,0.390625,0.390625,0.1953125,0.1953125	86.6660233162108,89.5348837209299,55.53652032259,91.2126537785591,88.3409651285664,92.1148843627479,93.6411064607214,105.383734249714,81.9154929577463,110.78431372549,89.3879093991045,92.4930491195551,89.706912203346,92.5822500543454,90.7778387166239,92.5984099295496,90.2319680040628	0.716
406109	97.4	114	17	1.54	37.1	-145	219	4.43	FALSE	inactive	Response Difference lower than 25%	8.41628	-1.54238	97.3586	125.169	37.0953	50,50,25,25,12.5,6.25,6.25,3.125,3.125,1.5625,1.5625,0.78125,0.78125,0.390625,0.390625,0.1953125,0.1953125	127.714304784019,102.159468438538,100.684176015773,110.193321616872,104.684748150757,103.226526407063,100.643917995846,81.786941580756,106.25352112676,96.7320261437908,88.190547718741,99.3512511584801,91.9567783619137,102.119733439883,100.676604475053,100.082692756428,101.898821769267	0.0436
406120	98.9	102	2.74	7.32	18.6	-3.2	40.5	4.73	FALSE	inactive	Response Difference lower than 25%	2.30213	-7.31519	98.8859	101.63	18.6316	50,50,25,25,12.5,6.25,6.25,3.125,3.125,1.5625,1.5625,0.78125,0.78125,0.390625,0.390625,0.1953125,0.1953125	101.046181367862,101.744186046512,104.04260580099,99.2267135325131,97.9218034519196,97.4926226183758,98.7861762355453,103.550973654066,99.9436619718311,101.307189542484,96.3205525522653,96.2001853568118,98.6372115758707,96.3666178972635,100.800010637084,98.4386527124869,99.7773875278391	0.217
406126									FALSE	inconclusive	Fit did not converge						50,50,25,25,12.5,6.25,6.25,3.125,3.125,1.5625,1.5625,0.78125,0.78125,0.390625,0.390625,0.1953125,0.1953125	92.4190218040538,93.3554817275744,212.4416518834,108.224956063269,107.291299753434,102.688665171766,104.287620113014,104.009163802978,170.591549295775,128.43137254902,130.638492719522,104.355885078777,119.904753670802,105.300059847764,114.448668175186,99.3426835163408,109.210856482656
406190	94.3	85.2	9.08	-1.57	10.8	-17	38.6	4.97	FALSE	inactive	Response Difference lower than 25%	5.3062	1.57233	84.3963	94.3087	10.8145	50,50,25,25,12.5,6.25,6.25,3.125,3.125,1.5625,1.5625,0.78125,0.78125,0.390625,0.390625,0.1953125,0.1953125	82.4833384277054,90.5315614617941,74.5509406378762,93.6731107205626,90.4543853469533,93.1902571944036,93.5694412460267,87.9725085910652,91.718309859155,100.980392156863,88.4468330397136,91.7516218721038,94.069511088056,97.2758804649864,95.6961101266035,93.7503050498876,94.0834995515535	0.062
406219	95.3	90.8	4.42	-0.0497	7.02			5.15	FALSE	inactive	Response Difference lower than 25%	8.31638	0.0496824	60.2855	124.517	7.02454	50,50,25,25,12.5,6.25,6.25,3.125,3.125,1.5625,1.5625,0.78125,0.78125,0.390625,0.390625,0.1953125,0.1953125	92.6797912993793,93.3554817275744,74.3237459881981,102.882249560633,97.3582247270165,90.6804906133597,96.498768515547,77.8923253150057,89.8028169014081,105.882352941176,90.6718960744939,96.3855421686747,95.6373456944071,91.8246379284156,96.0652888977843,95.0658740606971,95.8691002363248	0.883
406245	76.5	84.2	7.68	0.0206	0.0118	-0.783	0.806	7.93	FALSE	inconclusive	IC50 lower than lowest measured concentration	18.3494	-0.020631	-62.0483	207.353	0.0118411	50,50,25,25,12.5,6.25,6.25,3.125,3.125,1.5625,1.5625,0.78125,0.78125,0.390625,0.390625,0.1953125,0.1953125	69.9343484950063,86.2126245847175,78.7642340336327,90.579964850615,86.6502289538571,88.1714815833514,91.4253639554177,96.4490263459336,68.3943661971831,100.980392156863,49.4222866939501,92.4930491195551,52.351840582939,99.091845268297,57.3316896506978,92.4340674365847,63.9962214867953	0.938
406276									FALSE	inconclusive	Fit did not converge						50,50,25,25,12.5,6.25,6.25,3.125,3.125,1.5625,1.5625,0.78125,0.78125,0.390625,0.390625,0.1953125,0.1953125	96.8623911635956,98.2558139534883,14.3183452319997,106.88927943761,98.4149348362099,96.7725412224307,97.4986423345754,91.1798396334479,18.3661971830986,101.307189542484,35.1301921082488,94.9026876737719,49.7612468368532,98.0316215789716,68.828037352158,97.5325358688523,84.035645583883
406482	87.1	78.1	9.02	-0.055	319			3.5	FALSE	inactive	IC50 larger than highest measured concentration	12.9721	0.0550404	14.8426	135.203	319.15	50,50,25,25,12.5,6.25,6.25,3.125,3.125,1.5625,1.5625,0.78125,0.78125,0.390625,0.390625,0.1953125,0.1953125	70.9810825207491,78.156146179402,6.34798070132253,85.0966608084359,86.0866502289536,87.2750073424175,73.4188745819238,97.5945017182131,28.2816901408451,94.1176470588236,52.5028306866751,94.1612604263207,72.1196270839639,91.6731844352486,82.5391177739064,92.8454184348418,86.4353953286229	0.788
406727	98.9	94.5	4.47	-2.96	243	-3130	3620	3.61	FALSE	inactive	IC50 larger than highest measured concentration	5.19468	2.96059	-388.569	98.9256	243.199	50,50,25,25,12.5,6.25,6.25,3.125,3.125,1.5625,1.5625,0.78125,0.78125,0.390625,0.390625,0.1953125,0.1953125	98.1708299518466,90.6146179401993,96.3559429749018,101.054481546573,101.021486438887,96.5937009048653,96.4266850213891,99.8854524627721,107.042253521127,99.0196078431373,85.6226578485226,100.463392029657,102.863009553452,95.3064434450941,100.183939563772,97.8622638746719,103.069529234971	0.66
406745	98.8	92.8	5.95	-6.02	5.15	-0.636	10.9	5.29	FALSE	inactive	Response Difference lower than 25%	4.04566	6.01584	92.8444	98.7987	5.15122	50,50,25,25,12.5,6.25,6.25,3.125,3.125,1.5625,1.5625,0.78125,0.78125,0.390625,0.390625,0.1953125,0.1953125	95.2952234629628,87.9568106312294,96.6974107382474,92.1265377855888,92.2155688622754,94.4440624315288,93.9973876123748,99.4272623138602,97.9154929577464,109.477124183007,93.4953755943472,98.7951807228916,98.9092172687037,96.3663224743252,99.8772236652711,98.4373957397986,94.7524441315749	0.0469
406790	98.6	98.7	0.0824	0.027	14100			1.85	FALSE	inactive	IC50 larger than highest measured concentration	3.74037	-0.0269687	97.6327	99.8658	14074	50,50,25,25,12.5,6.25,6.25,3.125,3.125,1.5625,1.5625,0.78125,0.78125,0.390625,0.390625,0.1953125,0.1953125	135.81822487139,70.0166112956808,98.9749857228037,100.210896309315,100.528355054597,92.8303621793226,95.4978954733562,102.634593356243,104.901408450704,97.0588235294117,98.63112750793,93.6051899907321,96.046285304488,97.5773103366269,98.3399651815473,101.068720970115,101.338705920031	1
406823	93.6	58.5	35.1	-1.27	302	-979	1580	3.52	FALSE	inactive	IC50 larger than highest measured concentration	4.76044	1.27359	-288.418	93.6383	301.877	50,50,25,25,12.5,6.25,6.25,3.125,3.125,1.5625,1.5625,0.78125,0.78125,0.390625,0.390625,0.1953125,0.1953125	50.5852859515642,64.2026578073088,87.53128879132,77.7855887521969,81.6484677703416,86.019570456908,86.7090073926246,94.8453608247422,91.0422535211265,92.483660130719,95.4641533081537,91.7516218721038,96.5234369371315,93.4892969500294,97.232928730942,94.9835289775665,92.7991535462494	6.37e-08
406869	98.3	82	16.3	-3.62	88.8			4.05	FALSE	inactive	IC50 larger than highest measured concentration	4.97145	3.62068	-48.5549	98.3263	88.79	50,50,25,25,12.5,6.25,6.25,3.125,3.125,1.5625,1.5625,0.78125,0.78125,0.390625,0.390625,0.1953125,0.1953125	83.5278618219259,80.4817275747507,29.5150400506712,96.6959578207382,99.7534343078548,98.7449710265864,93.2114405010242,110.423825887743,94.9859154929575,102.614379084967,93.6670672806015,102.873030583874,93.0470401369116,94.7010726068348,96.4954709418678,99.0131694633197,98.7153091404788	0.0018
406958	98.8	94.6	4.18	-0.024	0.54	-73.5	74.6	6.27	FALSE	inactive	Response Difference lower than 25%	6.61727	0.0240494	35.3854	160.724	0.539843	50,50,25,25,12.5,6.25,6.25,3.125,3.125,1.5625,1.5625,0.78125,0.78125,0.390625,0.390625,0.1953125,0.1953125	95.8175276722177,92.4418604651164,87.6456915083246,93.1107205623904,94.0471997182106,110.394416033043,94.7838459541803,111.340206185567,92.9577464788734,98.3660130718953,92.5545775034921,96.7562557924003,94.6144978812594,97.8809066431513,95.7579331747237,102.220509114055,94.8081108622815	0.821
407249									FALSE	inconclusive	Fit did not converge						50,50,25,25,12.5,6.25,6.25,3.125,3.125,1.5625,1.5625,0.78125,0.78125,0.390625,0.390625,0.1953125,0.1953125	61.5688936937059,76.9102990033222,277.401380886526,83.6906854130054,88.481859809792,91.5780720442687,93.783716519924,109.50744558992,158.647887323943,99.9999999999999,120.710149650036,98.9805375347544,110.838495788567,91.6725935893721,106.947664950271,98.6839228512957,103.181334602155
407341	96.4	58.9	37.6	-0.834	47.1	-422	516	4.33	TRUE	active		8.73741	0.833916	22.3617	97.2052	47.1369	50,50,25,25,12.5,6.25,6.25,3.125,3.125,1.5625,1.5625,0.78125,0.78125,0.390625,0.390625,0.1953125,0.1953125	58.6920968647718,58.7209302325581,27.583487461016,70.1230228471004,77.7738640366327,87.0971576685141,86.9238868479692,102.405498281787,70.7605633802814,109.803921568627,84.5096115343422,95.8294717330861,90.0476397908636,95.4583400726694,94.8359459836113,98.7662411903262,95.7577304744674	0.000101
500041	99.2	111	11.9	2.29	63.4	-447	573	4.2	FALSE	inactive	IC50 larger than highest measured concentration	8.15743	-2.28605	99.2044	131.58	63.3551	50,50,25,25,12.5,6.25,6.25,3.125,3.125,1.5625,1.5625,0.78125,0.78125,0.390625,0.390625,0.1953125,0.1953125	123.531449846935,99.003322259136,95.2746808494684,107.943760984183,103.346248679112,108.96112947363,95.5701648694977,83.1615120274915,106.929577464789,95.4248366013072,99.6577157882058,99.7219647822057,102.250076757923,99.6985455097805,101.414582121582,95.4770645943558,101.004778136678	0.233
500137	83.8	99.7	16	-5.56	107	-646	860	3.97	FALSE	inactive	IC50 larger than highest measured concentration	22.5153	5.55796	1172.1	83.7762	106.589	50,50,25,25,12.5,6.25,6.25,3.125,3.125,1.5625,1.5625,0.78125,0.78125,0.390625,0.390625,0.1953125,0.1953125	102.352834646038,97.6744186046511,43.8095104965281,100.492091388401,95.2448045086296,98.567529264779,99.5719606826601,93.9289805269187,46.5352112676057,106.862745098039,54.044354891446,96.9416126042632,62.4404585745528,98.0330986936649,74.5470491991098,99.8360586685318,85.933922846492	0.772
500167	101	110	9.05	0.824	18.5			4.73	FALSE	inactive	Response Difference lower than 25%	11.1266	-0.823728	101.079	114.566	18.4809	50,50,25,25,12.5,6.25,6.25,3.125,3.125,1.5625,1.5625,0.78125,0.78125,0.390625,0.390625,0.1953125,0.1953125	110.457945073459,104.900332225914,44.9481128411818,116.520210896309,108.841141246918,106.27287221396,106.717196375004,105.841924398625,83.6056338028168,128.75816993464,87.5060349488585,102.687673772011,94.4788053917867,102.72569512402,103.136050095064,102.467785060345,103.796137070113	0.674
500405	96	82.5	13.5	-4.4	1.08	0.396	1.77	5.97	FALSE	inactive	Response Difference lower than 25%	3.37735	4.39559	82.5361	96.0317	1.08176	50,50,25,25,12.5,6.25,6.25,3.125,3.125,1.5625,1.5625,0.78125,0.78125,0.390625,0.390625,0.1953125,0.1953125	80.9167658970976,78.3222591362123,37.7170983182949,82.7768014059753,81.9302571327931,83.6924319486076,86.2094190493297,89.1179839633447,77.6338028169012,128.104575163399,84.7664533923858,95.2734012974977,91.2751015033466,99.0926822999568,95.758113125381,94.0794179414129,95.1438536678286	1.27e-05
500417	99.6	79.5	20.1	-5.15	58.2	-273	390	4.24	FALSE	inactive	IC50 larger than highest measured concentration	5.72566	5.15081	35.6293	99.5885	58.1975	50,50,25,25,12.5,6.25,6.25,3.125,3.125,1.5625,1.5625,0.78125,0.78125,0.390625,0.390625,0.1953125,0.1953125	77.5155392516757,81.4784053156144,101.480107137524,96.7662565905096,96.6537513208874,97.6694816486172,95.7126122644649,83.3906071019473,108.169014084507,101.960784313725,103.936539747461,99.7219647822057,100.88623533702,101.665077537443,102.827654657093,100.246313158699,101.116038997204	0.000857
500611	91.9	32.3	59.6	-0.995	146	-1430	1730	3.84	FALSE	inactive	IC50 larger than highest measured concentration	13.7278	0.994607	-141.891	92.2568	146.268	50,50,25,25,12.5,6.25,6.25,3.125,3.125,1.5625,1.5625,0.78125,0.78125,0.390625,0.390625,0.1953125,0.1953125	1.69019784727,62.3754152823918,43.3534363537914,71.4586994727595,79.0419161676644,79.2091866465894,85.494556208975,89.8052691867124,77.4084507042255,93.1372549019608,84.4246561505276,90.8248378127896,89.2980169299711,92.4303041896141,94.0362452615493,95.147470309035,92.7432690128792	5.9e-05
500701									FALSE	inconclusive	Fit did not converge						50,50,25,25,12.5,6.25,6.25,3.125,3.125,1.5625,1.5625,0.78125,0.78125,0.390625,0.390625,0.1953125,0.1953125	98.1710000004251,105.232558139535,39.0265919201022,104.639718804921,98.2740401549839,95.6981007612802,95.2836434372067,90.950744558992,74.9295774647887,101.307189542484,85.1088628250214,93.0491195551436,91.1382340911585,98.1838628666412,98.8930335302061,96.7107431717302,97.9903711257557
500804	93.2	63.2	30	-0.649	530	-1740	2810	3.28	FALSE	inactive	IC50 larger than highest measured concentration	3.34079	0.648582	-80.3488	94.1919	530.125	50,50,25,25,12.5,6.25,6.25,3.125,3.125,1.5625,1.5625,0.78125,0.78125,0.390625,0.390625,0.1953125,0.1953125	58.6908215004321,63.9534883720928,51.779078892421,80.175746924429,82.4938358576962,81.3615056851289,82.7794577378565,86.5979381443299,85.8591549295772,94.1176470588236,86.9058375451597,90.8248378127896,92.0923378412677,92.7334081245741,93.4829969622331,94.078802827119,94.864195048093	8.95e-09
500887	96.8	101	4.24	-0.617	10200	-71200	91500	1.99	FALSE	inactive	IC50 larger than highest measured concentration	7.87451	0.617241	217.672	96.6923	10162.4	50,50,25,25,12.5,6.25,6.25,3.125,3.125,1.5625,1.5625,0.78125,0.78125,0.390625,0.390625,0.1953125,0.1953125	108.365667362024,93.1063122923589,56.8457176881987,103.936731107206,102.641775272984,100.536579225852,89.639008556836,94.3871706758304,96.5633802816901,101.307189542484,77.8343111225885,94.7173308619092,97.6821545865769,99.8471432478748,102.459555589857,99.9998662795015,104.464900147915	0.874
501426	97.5	94.4	3.05	-9.58	4.76	1.62	7.91	5.32	FALSE	inactive	Response Difference lower than 25%	1.89651	9.57572	94.414	97.4681	4.76408	50,50,25,25,12.5,6.25,6.25,3.125,3.125,1.5625,1.5625,0.78125,0.78125,0.390625,0.390625,0.1953125,0.1953125	95.2953935115414,95.1827242524915,92.3137259839229,96.9771528998243,93.2722789714688,92.4722736320957,95.7122869359937,101.030927835052,97.4647887323943,98.6928104575163,94.351496569923,96.7562557924003,97.0688670973976,96.6694264092842,97.048719241184,98.601978929661,96.9850666326409	0.0204
501444	84.2	73.9	10.4	-0.0575	1060			2.97	FALSE	inactive	IC50 larger than highest measured concentration	28.4116	0.0575082	0.918157	135.039	1064.73	50,50,25,25,12.5,6.25,6.25,3.125,3.125,1.5625,1.5625,0.78125,0.78125,0.390625,0.390625,0.1953125,0.1953125	104.96835183391,84.5514950166113,10.447019498174,88.5413005272409,86.7911236350827,83.6902175686573,83.5650098074917,106.529209621993,37.5211267605634,97.0588235294117,52.5030254746499,96.014828544949,58.691036337256,99.5458118505464,73.8695149789929,99.670860364375,83.0858989201434	0.954
501470	95.7	99.1	3.42	3.99	167	-10400	10700	3.78	FALSE	inactive	IC50 larger than highest measured concentration	4.30852	-3.99355	95.6644	517.084	166.596	50,50,25,25,12.5,6.25,6.25,3.125,3.125,1.5625,1.5625,0.78125,0.78125,0.390625,0.390625,0.1953125,0.1953125	104.18272740065,94.0199335548174,95.7867991780555,95.6414762741653,91.4406481155335,97.1325527838249,93.5688603023276,106.071019473081,97.0140845070422,89.8692810457516,94.3518026653117,94.7173308619092,95.4326431216587,93.0358719765005,98.7703071817708,97.1214790556924,95.4223869738034	0.711
501484	102	96.7	5.51	5.97	93.9			4.03	FALSE	inactive	IC50 larger than highest measured concentration	8.03398	-5.97199	102.2	-141.454	93.9287	50,50,25,25,12.5,6.25,6.25,3.125,3.125,1.5625,1.5625,0.78125,0.78125,0.390625,0.390625,0.1953125,0.1953125	131.112555579315,96.6777408637873,100.512007240013,105.202108963093,99.8943289890804,97.1327858764513,95.1408707137682,119.129438717068,104.338028169014,119.607843137255,99.743088574823,97.3123262279888,98.908951248466,97.2748957218575,100.429552216782,98.9308778683882,99.2738640706283	0.903
501486	100	83.7	16.7	-1.46	142	-1320	1610	3.85	FALSE	inactive	IC50 larger than highest measured concentration	4.86011	1.45873	7.57031	100.393	141.672	50,50,25,25,12.5,6.25,6.25,3.125,3.125,1.5625,1.5625,0.78125,0.78125,0.390625,0.390625,0.1953125,0.1953125	82.7430026072699,84.21926910299,98.633554988983,91.7047451669599,90.4543853469533,107.526793997399,92.8541833639566,107.903780068729,102.197183098591,102.287581699346,97.4325970997186,97.3123262279888,97.0688005923383,101.666111517728,100.614521498205,102.219893999761,97.1528109838607	0.000965
501496	102	101	0.588	-0.194	1.33			5.88	FALSE	inactive	Response Difference lower than 25%	5.04955	0.193557	100.522	102.781	1.32572	50,50,25,25,12.5,6.25,6.25,3.125,3.125,1.5625,1.5625,0.78125,0.78125,0.390625,0.390625,0.1953125,0.1953125	94.7713037922109,99.5016611295681,100.625891543669,107.80316344464,100.739697076435,93.9075414788326,102.00063067248,109.278350515464,106.25352112676,110.457516339869,100.684359722188,100.834105653383,98.9093059421159,99.5456641390773,102.274306385189,98.9309581006874,100.167163544118	0.998
501504	99	89.7	9.29	-3.82	62.7	-650	775	4.2	FALSE	inactive	IC50 larger than highest measured concentration	4.48362	3.81578	67.6716	99.0202	62.7294	50,50,25,25,12.5,6.25,6.25,3.125,3.125,1.5625,1.5625,0.78125,0.78125,0.390625,0.390625,0.1953125,0.1953125	86.6667885348148,92.7740863787376,99.6017104307819,97.1177504393676,96.442409299049,97.1324362375118,95.284154667662,109.50744558992,99.0422535211269,106.535947712418,96.9190803447527,94.7173308619092,96.9325760623907,95.1555807978047,101.413902307987,99.5892908601371,98.0462556591256	0.0529
501545	97.3	79.3	18.1	-9.8	64.5			4.19	FALSE	inactive	IC50 larger than highest measured concentration	3.96065	9.80266	-139.096	97.3465	64.4744	50,50,25,25,12.5,6.25,6.25,3.125,3.125,1.5625,1.5625,0.78125,0.78125,0.390625,0.390625,0.1953125,0.1953125	79.0804963207865,79.4850498338869,102.619061262664,96.555360281195,97.640014089468,93.3680485951505,97.2848550533852,87.9725085910652,104.338028169014,97.0588235294117,94.6082549474062,95.0880444856348,99.114274535102,98.4861790070985,98.893953278011,98.3554785622639,98.7726093911607	4.46e-05
501562	98.9	71.8	27.1	-1.89	42.5	-150	235	4.37	TRUE	active		5.89973	1.89124	51.8568	98.8691	42.5202	50,50,25,25,12.5,6.25,6.25,3.125,3.125,1.5625,1.5625,0.78125,0.78125,0.390625,0.390625,0.1953125,0.1953125	62.0888172228601,81.4784053156144,80.7579406807379,91.8453427065027,94.4698837618877,96.4147440409868,99.0713498784549,101.489117983963,94.1971830985918,108.169934640523,94.3514130893626,97.8683966635774,98.5686448596576,91.5223710251153,101.291735806042,100.411778903853,99.8330724087676	3.03e-05
501580	107	112	4.49	0.332	82.2			4.09	FALSE	inactive	IC50 larger than highest measured concentration	3.3979	-0.332183	105.909	119.105	82.1822	50,50,25,25,12.5,6.25,6.25,3.125,3.125,1.5625,1.5625,0.78125,0.78125,0.390625,0.390625,0.1953125,0.1953125	111.764853424502,109.21926910299,109.451175229173,118.207381370826,111.09545614653,106.810267264005,109.075386275275,105.61282932417,114.140845070423,126.143790849673,107.017974199498,106.580166821131,108.385124148319,110.599356519603,110.329777574989,104.112226265782,108.373423392315	0.284
501632	99.4	92.9	6.44	-1.11	17.5			4.76	FALSE	inactive	Response Difference lower than 25%	4.24158	1.10589	90.8815	99.4155	17.5277	50,50,25,25,12.5,6.25,6.25,3.125,3.125,1.5625,1.5625,0.78125,0.78125,0.390625,0.390625,0.1953125,0.1953125	72.810210056758,90.033222591362,101.537651019131,94.3760984182776,92.0042268404366,94.2656882992161,94.6410499929936,98.5108820160366,101.183098591549,108.496732026144,98.801566985776,95.4587581093605,98.6366351986895,100.152216669092,97.8483799742112,97.0396955986565,99.1628936136536	0.227
501633	97.8	97.7	0.11	0.226	243			3.61	FALSE	inactive	IC50 larger than highest measured concentration	5.23883	-0.226124	97.8761	97.4266	242.951	50,50,25,25,12.5,6.25,6.25,3.125,3.125,1.5625,1.5625,0.78125,0.78125,0.390625,0.390625,0.1953125,0.1953125	95.2927577585728,96.1794019933552,157.159866919591,107.451669595782,96.8650933427261,96.2367778207701,95.7126819777087,88.4306987399772,117.859154929577,94.7712418300654,105.819415964433,97.3123262279888,100.272548817485,97.2750926704837,101.413822329917,94.5728465818034,98.7155813938081	1
501686	87.8	33.2	54.6	-9.31	72	-359	503	4.14	FALSE	inactive	IC50 larger than highest measured concentration	12.17	9.30759	-1599.88	87.8382	72.0333	50,50,25,25,12.5,6.25,6.25,3.125,3.125,1.5625,1.5625,0.78125,0.78125,0.390625,0.390625,0.1953125,0.1953125	-180.290094372711,33.2225913621262,95.6161486128137,88.822495606327,62.4163437830221,62.3613098873229,78.3481586292333,89.8052691867124,95.6619718309859,97.7124183006535,94.0945990581724,90.6394810009267,93.6602832893845,89.0988689486614,94.2820578597351,92.3517490975537,92.5200031327283	0.00172
501721	99.2	101	1.58	3.43	1.08	-1.72	3.88	5.97	FALSE	inactive	Response Difference lower than 25%	3.7682	-3.42696	99.1857	100.768	1.08016	50,50,25,25,12.5,6.25,6.25,3.125,3.125,1.5625,1.5625,0.78125,0.78125,0.390625,0.390625,0.1953125,0.1953125	97.1252012418647,100.249169435216,95.9004983340878,108.646748681898,101.937301866854,97.6683161854855,98.2134819371822,80.4123711340207,106.366197183099,99.0196078431373,102.823883009229,97.3123262279888,99.113786831333,98.0318677647538,100.552998367848,98.5195268701312,101.450729089878	0.88
501747	96.9	92.8	4.16	-0.0801	2.32	-18.6	23.2	5.63	FALSE	inactive	Response Difference lower than 25%	5.16142	0.0800677	76.2456	113.891	2.31717	50,50,25,25,12.5,6.25,6.25,3.125,3.125,1.5625,1.5625,0.78125,0.78125,0.390625,0.390625,0.1953125,0.1953125	85.0974102026596,92.8571428571428,96.8686167463617,91.8453427065027,90.1021486438885,94.9808747500078,92.8550199228832,98.2817869415807,102.084507042254,106.862745098039,95.4641533081537,96.014828544949,94.0013877389055,92.8843692461766,97.7248338505581,90.8716503850815,94.5847905314646	0.689
501753									FALSE	inconclusive	Fit did not converge						50,50,25,25,12.5,6.25,6.25,3.125,3.125,1.5625,1.5625,0.78125,0.78125,0.390625,0.390625,0.1953125,0.1953125	113.856620990201,96.5116279069764,20.6941999081482,109.6309314587,103.557590700951,98.7443882950206,98.6422881002047,97.8235967926689,67.7183098591546,103.59477124183,66.28132503685,98.0537534754403,86.6394771815598,99.0912544224205,93.6667465780885,104.687304642709,97.4317072942747
501792	91.9	91.4	0.499	-0.426	63			4.2	FALSE	inactive	IC50 larger than highest measured concentration	8.21478	0.425807	90.745	92.0038	63.0494	50,50,25,25,12.5,6.25,6.25,3.125,3.125,1.5625,1.5625,0.78125,0.78125,0.390625,0.390625,0.1953125,0.1953125	88.4981267023457,96.8438538205977,55.3088628038516,90.3690685413008,95.4561465304684,91.7556303523892,94.5688038346003,102.176403207331,74.0281690140845,93.1372549019608,76.8925669187133,95.0880444856348,87.1844861431166,97.275388093422,91.9458584456142,97.5326428452515,94.6967592506463	1
501799	94.2	98.5	4.27	11.5	0.625	-0.326	1.58	6.2	FALSE	inactive	Response Difference lower than 25%	5.4116	-11.5482	94.2149	98.4828	0.624913	50,50,25,25,12.5,6.25,6.25,3.125,3.125,1.5625,1.5625,0.78125,0.78125,0.390625,0.390625,0.1953125,0.1953125	125.883901883671,92.3588039867107,99.6580138233067,101.405975395431,98.4853821768227,93.726195415534,93.4258087259135,104.925544100802,100.957746478873,99.3464052287581,100.000264355109,99.1658943466172,97.8184899582901,81.9828196790083,97.171625540277,99.9998662795015,97.6549005735379	0.52
501829	62.9	81.3	18.4	0.0729	0.373	-32.2	33	6.43	FALSE	inactive	Response Difference lower than 25%	41.8021	-0.0728846	-26.8072	156.941	0.372603	50,50,25,25,12.5,6.25,6.25,3.125,3.125,1.5625,1.5625,0.78125,0.78125,0.390625,0.390625,0.1953125,0.1953125	108.36617750776,96.3455149501661,2.76146755783155,96.133567662566,93.6949630151463,98.0276284690008,93.1397985240778,105.154639175258,7.54929577464786,96.078431372549,17.3298269642767,93.4198331788692,24.9484087001918,99.5458610877034,37.9645801121332,98.1903337463068,53.1110251798935	0.927
501867	102	102	0.606	-0.188	1.1	-49.3	51.5	5.96	FALSE	inactive	Response Difference lower than 25%	5.9339	0.188178	103.247	100.852	1.09832	50,50,25,25,12.5,6.25,6.25,3.125,3.125,1.5625,1.5625,0.78125,0.78125,0.390625,0.390625,0.1953125,0.1953125	112.285117050814,92.2757475083055,97.5517189059145,104.780316344464,101.0919337795,98.5647321532629,98.1414913940164,114.318442153494,106.478873239437,105.555555555556,100.940505908893,102.502316960148,99.2500778663403,99.8483249396289,101.59799183064,101.726706056268,99.7204321313742	0.999
501880	101	99.2	1.87	-0.0246	0.289			6.54	FALSE	inactive	Response Difference lower than 25%	8.26164	0.024582	73.473	128.428	0.28909	50,50,25,25,12.5,6.25,6.25,3.125,3.125,1.5625,1.5625,0.78125,0.78125,0.390625,0.390625,0.1953125,0.1953125	108.104812842409,93.9368770764117,88.556377127566,98.0316344463973,95.5265938710812,110.929888068921,94.4977428013521,119.587628865979,99.492957746479,104.248366013072,94.6083662548201,97.6830398517145,96.9322878738001,100.908499391798,98.5239347370952,105.016390790134,96.3716980322165	0.989
501883	101	98.6	1.96	-0.963	2060			2.69	FALSE	inactive	IC50 larger than highest measured concentration	6.54116	0.962958	27.8045	100.525	2057.81	50,50,25,25,12.5,6.25,6.25,3.125,3.125,1.5625,1.5625,0.78125,0.78125,0.390625,0.390625,0.1953125,0.1953125	93.4639703197211,98.5049833887044,51.605521509479,108.295254833041,102.500880591758,101.61259306223,98.7136047486803,106.758304696449,87.2112676056335,107.516339869281,92.8106958633439,108.248378127896,97.3413604939995,100.756750475693,97.9712062952341,99.7535531208023,100.334072985128	0.97
501967	97.6	90	7.59	-2.23	9.05	-24.3	42.4	5.04	FALSE	inactive	Response Difference lower than 25%	5.6929	2.23454	89.8528	97.6062	9.04644	50,50,25,25,12.5,6.25,6.25,3.125,3.125,1.5625,1.5625,0.78125,0.78125,0.390625,0.390625,0.1953125,0.1953125	86.9284932973227,92.940199335548,85.5392855023577,94.7275922671355,95.0334624867908,91.9347037625809,94.7122969282255,108.132875143184,89.1267605633804,107.516339869281,91.6133898366873,99.1658943466172,94.5467070574059,94.7012203183039,97.5406243608004,97.4508326441156,96.817667135638	0.15
501976	103	104	1.01	0.0681	0.321	-104	104	6.49	FALSE	inactive	Response Difference lower than 25%	11.1225	-0.0681136	97.5252	108.351	0.321395	50,50,25,25,12.5,6.25,6.25,3.125,3.125,1.5625,1.5625,0.78125,0.78125,0.390625,0.390625,0.1953125,0.1953125	126.666975588251,100.332225913621,75.97309656902,110.966608084359,104.26206410708,104.838944649825,105.787616743541,100.343642611684,95.4366197183095,114.052287581699,96.5767543926775,102.873030583874,101.772548263276,103.179021623236,104.795715014943,103.618556928493,105.302768843583	0.999
501984	98.5	103	4.07	-0.0378	4910000000	4910000000	4910000000	-3.69	FALSE	inactive	IC50 larger than highest measured concentration	5.39168	0.0378182	163.113	72.3374	4.91171e+09	50,50,25,25,12.5,6.25,6.25,3.125,3.125,1.5625,1.5625,0.78125,0.78125,0.390625,0.390625,0.1953125,0.1953125	108.88899186275,100.747508305648,41.1902085419524,102.460456942003,98.5558295174354,100.181054697515,101.215589833299,103.780068728522,78.7605633802817,103.59477124183,86.5637342079129,99.5366079703429,94.0015429173775,103.483405724263,100.307545670977,101.480499873968,99.8889206416937	0.756
502003	101	101	0.0171	-0.0927	3.16e+36	3.16e+36	3.16e+36	-30.5	FALSE	inactive	IC50 larger than highest measured concentration	12.7584	0.0927253	28.9874	100.89	3.15677e+36	50,50,25,25,12.5,6.25,6.25,3.125,3.125,1.5625,1.5625,0.78125,0.78125,0.390625,0.390625,0.1953125,0.1953125	107.059184132427,105.31561461794,14.2045164726304,115.395430579965,109.334272631208,105.377155524062,106.50333938057,101.947308132875,47.661971830986,103.59477124183,68.3354477104207,103.985171455051,84.6626586284219,104.391683548857,94.2209946032798,100.904886615046,101.842574231458	1
502026	87	13.4	73.7	-1.26	166	-1590	1920	3.78	FALSE	inactive	IC50 larger than highest measured concentration	14.9926	1.26286	-322.005	87.127	165.906	50,50,25,25,12.5,6.25,6.25,3.125,3.125,1.5625,1.5625,0.78125,0.78125,0.390625,0.390625,0.1953125,0.1953125	20.2572069776033,6.39534883720932,22.7441173739661,80.5272407732865,80.3099682986966,80.2848508440282,87.3525535845041,84.306987399771,59.0422535211268,92.483660130719,72.7858520485159,89.8980537534754,80.8456229140965,94.7018604013375,91.0235113531871,92.5167067048124,92.4639733975825	1.55e-05
502045	95.9	98.4	2.5	0.681	251			3.6	FALSE	inactive	IC50 larger than highest measured concentration	5.23388	-0.681394	95.8509	106.187	250.991	50,50,25,25,12.5,6.25,6.25,3.125,3.125,1.5625,1.5625,0.78125,0.78125,0.390625,0.390625,0.1953125,0.1953125	97.1240109018144,98.1727574750832,88.442826089633,108.365553602812,100.387460373371,98.2060026013133,98.927833547082,90.950744558992,90.9295774647887,99.0196078431373,89.3025087856334,97.126969416126,96.0462409677816,100.151675060371,96.5568741051203,95.9704397465462,97.655227277533	0.907
502890	92.5	83.4	9.05	-0.446	115	-2830	3060	3.94	FALSE	inactive	IC50 larger than highest measured concentration	4.18879	0.44559	68.2517	93.8835	114.942	50,50,25,25,12.5,6.25,6.25,3.125,3.125,1.5625,1.5625,0.78125,0.78125,0.390625,0.390625,0.1953125,0.1953125	79.8673110940968,19.5182724252492,86.7919758130549,93.3919156414765,81.0848890454385,86.37876619411,87.9238536179893,84.7651775486827,92.3943661971828,98.0392156862745,90.3295144687118,89.5273401297498,90.8652973274939,92.127151017498,91.8842353426692,92.6807015244806,91.6822977890577	0.0637
503039	95.8	92	3.76	-0.0615	0.841			6.08	FALSE	inactive	Response Difference lower than 25%	3.73537	0.0614716	72.6105	116.924	0.840923	50,50,25,25,12.5,6.25,6.25,3.125,3.125,1.5625,1.5625,0.78125,0.78125,0.390625,0.390625,0.1953125,0.1953125	87.4502023365526,93.1063122923589,87.7025688584842,101.265377855888,95.7379358929199,92.1130778948936,95.284108192166,88.8888888888889,92.0563380281693,97.7124183006535,95.0357588981237,94.1612604263207,93.2515431944816,94.7013680297731,94.773922990316,96.2171808108408,97.3755505075755	0.523
503202	94.2	81.1	13.1	-0.954	112	-356	579	3.95	FALSE	inactive	IC50 larger than highest measured concentration	3.01777	0.953974	52.7432	94.293	111.548	50,50,25,25,12.5,6.25,6.25,3.125,3.125,1.5625,1.5625,0.78125,0.78125,0.390625,0.390625,0.1953125,0.1953125	75.9459058466527,84.3853820598004,89.8665002312957,87.6977152899826,88.4114124691792,88.5294535842651,89.2104347712928,97.5945017182131,91.718309859155,107.18954248366,93.4103923836792,93.0491195551436,95.0918711974347,92.2781121391014,95.3272112786673,96.6282376240007,92.854402821851	7.58e-05
503217	105	116	11.3	5.52	91.5	-1930	2120	4.04	FALSE	inactive	IC50 larger than highest measured concentration	12.6306	-5.51781	104.605	432.431	91.478	50,50,25,25,12.5,6.25,6.25,3.125,3.125,1.5625,1.5625,0.78125,0.78125,0.390625,0.390625,0.1953125,0.1953125	113.072016848413,118.853820598006,254.966469302385,98.945518453427,99.4716449454033,99.4629545888938,97.4994324180059,90.950744558992,141.746478873239,111.437908496732,106.674340385308,95.6441149212234,110.361011630627,99.6970191579311,105.717302315705,102.713295896051,104.297337298915	0.624
503244	81.3	65.9	15.3	-0.0559	1.1	-66.2	68.4	5.96	FALSE	inactive	Response Difference lower than 25%	31.6377	0.0558905	-22.7472	175.718	1.10027	50,50,25,25,12.5,6.25,6.25,3.125,3.125,1.5625,1.5625,0.78125,0.78125,0.390625,0.390625,0.1953125,0.1953125	81.6995845288103,91.1960132890366,4.69668607044625,82.4956063268892,78.0556533990842,85.6620646412469,83.0651658489688,100.114547537228,20.3943661971831,99.6732026143791,34.5306347221809,96.7562557924003,52.0106474600053,93.9439528524684,68.951383530636,101.068667481916,80.8533853204088	0.908
503445	97.4	65.4	32	-2.58	7.3	4.16	10.4	5.14	TRUE	active		3.76559	2.58466	65.1621	97.4247	7.30048	50,50,25,25,12.5,6.25,6.25,3.125,3.125,1.5625,1.5625,0.78125,0.78125,0.390625,0.390625,0.1953125,0.1953125	69.6733239268128,60.1328903654482,93.5667495603438,64.8506151142355,76.787601268052,80.6445127664829,82.1360509724647,100.57273768614,96.112676056338,95.4248366013072,98.1168316010653,93.2344763670065,95.2963299182985,96.2153613527217,97.2947717735799,98.7660004934287,98.8834527965817	1.3e-09
503447	94.9	68.3	26.7	-1.99	11	4.09	18	4.96	TRUE	active		3.63914	1.98625	66.9346	94.9442	11.0196	50,50,25,25,12.5,6.25,6.25,3.125,3.125,1.5625,1.5625,0.78125,0.78125,0.390625,0.390625,0.1953125,0.1953125	68.1054760318655,68.2724252491694,64.1290549296897,78.7697715289985,80.5213103205354,86.3797568377719,86.3521917727681,96.6781214203894,94.5352112676054,94.1176470588236,93.7529131237286,90.2687673772011,92.8424262375758,94.0946185511326,95.8804795725012,98.5199280316276,95.4220058191426	5.39e-09
503479	101	69.5	31.4	-0.709	302	-4340	4950	3.52	FALSE	inactive	IC50 larger than highest measured concentration	6.09012	0.708948	-46.0215	101.708	302.263	50,50,25,25,12.5,6.25,6.25,3.125,3.125,1.5625,1.5625,0.78125,0.78125,0.390625,0.390625,0.1953125,0.1953125	65.2296994944031,71.0963455149502,87.0762144457546,82.0035149384888,82.9869672419866,84.2290694476168,88.0673234738666,110.652920962199,94.6478873239439,105.555555555556,95.9774474482919,97.126969416126,97.0005220647158,102.270694561486,98.7697873243157,100.575559770723,99.8877771777113	6.6e-06
504161	100	173	73.1	1.07	18.1	-12.1	48.2	4.74	TRUE	active		6.91101	-1.06533	99.4597	198.31	18.0682	50,50,25,25,12.5,6.25,6.25,3.125,3.125,1.5625,1.5625,0.78125,0.78125,0.390625,0.390625,0.1953125,0.1953125	171.901512964717,174.418604651162,92.5991125318929,158.488576449912,138.006340260655,126.702275450218,120.435693831516,123.940435280642,101.746478873239,118.300653594771,98.1168872547728,100.463392029657,97.2730154613177,105.450676309271,101.4138023354,104.111985568884,95.868991334993	4.04e-10
504162	101	89.4	11.2	-3.04	1.52	-0.967	4.01	5.82	FALSE	inactive	Response Difference lower than 25%	6.72337	3.04434	89.3627	100.576	1.52106	50,50,25,25,12.5,6.25,6.25,3.125,3.125,1.5625,1.5625,0.78125,0.78125,0.390625,0.390625,0.1953125,0.1953125	93.4641403682996,97.9235880398671,95.9009056588613,84.8154657293498,89.8908066220497,72.0419380253324,88.8541768573871,84.9942726231387,98.8169014084505,93.4640522875816,96.8330397136507,96.3855421686747,100.136102604005,98.1833212579207,101.782461249125,103.124753870707,100.166818689901	0.0325
504166	97	-1.02	98	-1.56	14.7	8.01	21.4	4.83	TRUE	active		6.02734	1.56394	-15.477	97.0812	14.6947	50,50,25,25,12.5,6.25,6.25,3.125,3.125,1.5625,1.5625,0.78125,0.78125,0.390625,0.390625,0.1953125,0.1953125	-3.00645887013771,2.40863787375415,83.6040484749808,13.4622144112478,58.2599506868617,60.7529124923661,72.847690737178,90.0343642611684,91.2676056338029,102.287581699346,94.7793066160296,93.0491195551436,97.2732814815554,92.7329649901666,96.7415434687811,95.3947462553248,96.1484684525092	3.79e-13
504167	105	11.6	93.3	-1.47	31.6	-51	114	4.5	TRUE	active		16.3073	1.46839	-35.966	105.042	31.5857	50,50,25,25,12.5,6.25,6.25,3.125,3.125,1.5625,1.5625,0.78125,0.78125,0.390625,0.390625,0.1953125,0.1953125	10.8490993164472,11.1295681063123,192.970601982505,51.4235500878733,76.2240225431489,75.0899737537701,86.7097974760552,90.0343642611684,147.830985915493,94.4444444444444,115.661050558332,95.2734012974977,110.089028106147,98.9407856723815,105.594935868585,97.2042520444194,102.121670194313	2.73e-06
504173	99.4	20.9	78.5	-1.29	225	-1050	1500	3.65	FALSE	inactive	IC50 larger than highest measured concentration	3.26608	1.28774	-524.822	99.4701	225.159	50,50,25,25,12.5,6.25,6.25,3.125,3.125,1.5625,1.5625,0.78125,0.78125,0.390625,0.390625,0.1953125,0.1953125	20.0010287939007,21.6777408637873,65.4995546736767,64.1476274165205,83.902782669954,94.8031416224176,94.9981909413218,97.3654066437572,92.281690140845,105.882352941176,92.383136258919,97.6830398517145,97.2735253334397,97.7290100155761,101.599471424935,100.658573456347,100.949347358857	4.44e-16
504174	105	84.6	20.2	-11.9	3.18	2.15	4.2	5.5	FALSE	inactive	Response Difference lower than 25%	8.98848	11.91	84.5581	104.791	3.1768	50,50,25,25,12.5,6.25,6.25,3.125,3.125,1.5625,1.5625,0.78125,0.78125,0.390625,0.390625,0.1953125,0.1953125	70.7203980497128,85.2990033222589,42.4993688780358,94.8681898066784,88.5523071504052,78.4963893952176,89.4255698418648,96.2199312714777,95.098591549296,123.856209150327,92.64059030774,99.1658943466172,100.204913172103,107.873045931128,106.456219704557,101.151199773745,106.977743925597	0.0025
504181	100	92.8	7.62	0.345	1420000	-5080000	7930000	-0.152	FALSE	inactive	IC50 larger than highest measured concentration	4.37736	-0.345418	101.736	-217.15	1.4225e+06	50,50,25,25,12.5,6.25,6.25,3.125,3.125,1.5625,1.5625,0.78125,0.78125,0.390625,0.390625,0.1953125,0.1953125	85.3588598922997,96.2624584717609,289.755096905803,98.945518453427,94.6812257837265,100.717284284429,96.2132463064179,95.9908361970217,122.816901408451,96.7320261437908,107.702431315673,96.9416126042632,100.818200661282,97.7284684068556,101.906067356331,98.0266063676362,99.3302749604346	0.12
504243	91.7	59.9	31.8	-8.68	65.3	-307	438	4.19	FALSE	inactive	IC50 larger than highest measured concentration	9.08437	8.67542	-263.202	91.7136	65.3103	50,50,25,25,12.5,6.25,6.25,3.125,3.125,1.5625,1.5625,0.78125,0.78125,0.390625,0.390625,0.1953125,0.1953125	49.5416978245261,70.1827242524917,94.0789234332184,92.1265377855888,79.323705530116,77.0609467290109,87.4240096594669,76.9759450171822,100.394366197183,94.7712418300654,98.3743134767404,93.9759036144578,96.6597944771982,96.0637109109296,98.893473409591,93.6681204313554,95.8126893465186	0.000822
504245	100	6.49	93.5	-7.45	42.4	-349	434	4.37	TRUE	active		28.4413	7.45488	-20.7712	99.9538	42.3822	50,50,25,25,12.5,6.25,6.25,3.125,3.125,1.5625,1.5625,0.78125,0.78125,0.390625,0.390625,0.1953125,0.1953125	1.96014996584152,10.9634551495017,134.163754371682,61.4762741652023,69.108841141247,68.637037485956,79.277854449436,93.2416953035509,169.464788732394,106.535947712418,120.28328571695,94.9026876737719,108.248434082956,95.9128482636393,100.737967649271,94.9829940955713,97.6552635779768	0.00159
504253	103	96.7	6.51	-1.81	0.511	-2.52	3.54	6.29	FALSE	inactive	Response Difference lower than 25%	6.0355	1.81141	96.6921	104.349	0.51052	50,50,25,25,12.5,6.25,6.25,3.125,3.125,1.5625,1.5625,0.78125,0.78125,0.390625,0.390625,0.1953125,0.1953125	99.9998724635661,97.8405315614614,80.8701216262514,105.623901581722,102.07819654808,98.3858335625404,97.6421121904528,90.950744558992,94.0845070422533,98.6928104575163,100.342033770113,99.7219647822057,98.6363026733925,100.605493931151,101.413742351847,98.684297268692,108.093274716586	0.395
504258	96.7	88.7	8.09	-7.78	74.5	-1000	1150	4.13	FALSE	inactive	IC50 larger than highest measured concentration	3.64073	7.78306	-91.8322	96.742	74.5146	50,50,25,25,12.5,6.25,6.25,3.125,3.125,1.5625,1.5625,0.78125,0.78125,0.390625,0.390625,0.1953125,0.1953125	85.3591149651677,91.9435215946843,97.4944712605064,96.7662565905096,93.1313842902428,92.1141268117122,93.7832285272169,95.53264604811,105.014084507043,101.633986928104,97.0901876670831,93.4198331788692,96.1143199802257,97.2751419076397,97.6021274966405,96.7103152661337,97.3757501600168	0.0334
504261	102	104	2.5	2.46	3.87	-16.1	23.8	5.41	FALSE	inactive	Response Difference lower than 25%	5.9644	-2.4606	101.581	104.083	3.86792	50,50,25,25,12.5,6.25,6.25,3.125,3.125,1.5625,1.5625,0.78125,0.78125,0.390625,0.390625,0.1953125,0.1953125	98.954158729295,100.913621262458,101.081188066384,114.200351493849,106.093694963015,104.12055317542,100.999571728305,98.2817869415807,109.971830985915,108.496732026144,89.2165516350924,100.092678405931,100.749766955188,99.8487188368803,103.873028015718,104.522962149744,104.073418010774	0.875
504266	104	17.8	86.5	-1.32	32.9	-46.2	112	4.48	TRUE	active		11.444	1.32196	-32.1246	104.362	32.9386	50,50,25,25,12.5,6.25,6.25,3.125,3.125,1.5625,1.5625,0.78125,0.78125,0.390625,0.390625,0.1953125,0.1953125	10.3268801314816,23.0066445182724,233.049526711757,54.8681898066784,73.8992603029233,71.8633308003932,85.0657965214486,98.0526918671249,126.760563380282,113.398692810457,105.733458813892,97.6830398517145,104.771327895436,98.7885936218679,101.844184324658,99.8355237865366,98.3806190478048	6.46e-08
504267	99.7	51.9	47.8	-1.12	25.9	-22.6	74.3	4.59	TRUE	active		4.14163	1.12216	28.9561	99.9694	25.8565	50,50,25,25,12.5,6.25,6.25,3.125,3.125,1.5625,1.5625,0.78125,0.78125,0.390625,0.390625,0.1953125,0.1953125	47.1898409578157,55.564784053156,90.7765193190899,67.2407732864676,80.7326523423742,79.5692564811402,83.9938624460101,100.57273768614,97.5774647887321,98.3660130718953,98.8012608903874,99.1658943466172,98.0228156690352,96.6691309863459,99.5074850476001,98.6017917209626,98.6035945244048	1.27e-10
504269	96.4	68.9	27.4	-0.861	563	-2740	3870	3.25	FALSE	inactive	IC50 larger than highest measured concentration	3.87254	0.860667	-153.791	96.6196	563.341	50,50,25,25,12.5,6.25,6.25,3.125,3.125,1.5625,1.5625,0.78125,0.78125,0.390625,0.390625,0.1953125,0.1953125	66.5368629183143,68.770764119601,88.670409549322,80.5272407732865,84.2550193730187,88.3496808961943,84.8508938283563,99.6563573883162,95.6619718309859,95.4248366013072,95.4639863470329,91.9369786839666,95.3646527826269,96.0633170136783,97.2944318667822,98.3550239125685,96.5385167221169	9.61e-08
504582	102	24.7	77.4	-1.22	20.5	-4.11	45.1	4.69	TRUE	active		5.38142	1.22256	-1.35161	102.471	20.4696	50,50,25,25,12.5,6.25,6.25,3.125,3.125,1.5625,1.5625,0.78125,0.78125,0.390625,0.390625,0.1953125,0.1953125	22.3522904905859,25.0830564784053,96.4126166626752,49.8066783831281,62.5572384642481,80.4649148978819,76.4911837146144,106.758304696449,93.6338028169012,100.980392156863,94.265455938821,101.575532900834,94.6146530597314,103.633185154111,100.183859585701,101.561828681309,102.12014557567	3.86e-12
504591	101	32.7	67.9	-1.23	520	-2670	3710	3.28	FALSE	inactive	IC50 larger than highest measured concentration	9.95453	1.23331	-1187.61	100.709	519.576	50,50,25,25,12.5,6.25,6.25,3.125,3.125,1.5625,1.5625,0.78125,0.78125,0.390625,0.390625,0.1953125,0.1953125	19.9992432838252,40.8637873754152,91.0044360445025,68.1546572934973,79.6054948925675,80.8240523619273,82.7794112623605,110.423825887743,99.1549295774647,105.555555555556,98.9719786367681,101.390176088971,97.2729932929648,104.390846517197,100.614581481758,103.947027961625,99.4417173231796	1.97e-07
504596	102	61.1	41.2	-1.2	14.7	-14.6	44	4.83	TRUE	active		5.20264	1.19988	51.6071	102.6	14.6932	50,50,25,25,12.5,6.25,6.25,3.125,3.125,1.5625,1.5625,0.78125,0.78125,0.390625,0.390625,0.1953125,0.1953125	4.31345224547023,59.6345514950166,90.20765324368,71.2478031634448,83.6914406481156,79.5697809395496,86.0660421444443,105.61282932417,94.6478873239439,106.209150326797,97.4321518700621,102.316960148285,97.0687562556319,100.303030079225,101.044843503911,101.151092797346,103.181243851045	3.6e-07
504597	94.2	36.6	57.6	-2.41	184	-1010	1380	3.74	FALSE	inactive	IC50 larger than highest measured concentration	7.1332	2.41228	-1303.79	94.2394	184.314	50,50,25,25,12.5,6.25,6.25,3.125,3.125,1.5625,1.5625,0.78125,0.78125,0.390625,0.390625,0.1953125,0.1953125	26.7975303844925,46.0963455149501,90.7767600110014,78.5588752196838,87.2138076787602,81.8997748325227,92.0685383433299,103.780068728522,88.4507042253519,95.7516339869282,90.8430590505312,92.678405931418,92.3652524365789,97.2747972475444,100.123016268939,99.588782722242,97.0969627509347	2.15e-08
504600	88.9	104	15.5	0.0485	0.298	-27.3	27.9	6.53	FALSE	inactive	Response Difference lower than 25%	31.1677	-0.0485023	-25.6753	205.92	0.297508	50,50,25,25,12.5,6.25,6.25,3.125,3.125,1.5625,1.5625,0.78125,0.78125,0.390625,0.390625,0.1953125,0.1953125	124.315543842987,122.591362126246,33.3336542558819,139.156414762742,117.576611482917,106.631310400126,105.002180862645,95.9908361970217,43.2676056338028,120.915032679739,58.8358608000611,98.4244670991659,80.709065858852,102.271334644519,91.2082007113652,100.000427905596,99.888848040806	0.9
504606	103	101	2.3	-3.63	3.29	-4.14	10.7	5.48	FALSE	inactive	Response Difference lower than 25%	5.34305	3.62829	101.012	103.316	3.28846	50,50,25,25,12.5,6.25,6.25,3.125,3.125,1.5625,1.5625,0.78125,0.78125,0.390625,0.390625,0.1953125,0.1953125	66.5361827239997,69.6843853820596,107.515438303211,101.757469244288,96.7946460021134,98.3883975814307,100.429340631225,100.801832760596,103.098591549296,116.993464052288,98.4592132068474,98.239110287303,102.318022760248,102.422640426217,103.135930127959,102.302880941285,103.572544485967	0.876
504607	109	79.9	28.7	-0.678	47.3			4.33	TRUE	active		11.4551	0.678347	50.8986	110.028	47.3324	50,50,25,25,12.5,6.25,6.25,3.125,3.125,1.5625,1.5625,0.78125,0.78125,0.390625,0.390625,0.1953125,0.1953125	28.6278482605519,73.255813953488,107.230588683351,85.2372583479792,85.945755547728,73.1197583295648,98.7859206203178,103.092783505155,116.394366197183,116.339869281046,106.07628564933,99.9073215940686,105.453891488128,109.538541984401,111.128958439596,103.454348156028,107.033664759411	0.027
504608	101	92.9	7.81	-3.79	55.2	-625	736	4.26	FALSE	inactive	IC50 larger than highest measured concentration	3.11456	3.78951	81.5266	100.721	55.2347	50,50,25,25,12.5,6.25,6.25,3.125,3.125,1.5625,1.5625,0.78125,0.78125,0.390625,0.390625,0.1953125,0.1953125	89.5424800479877,96.2624584717609,100.56955112162,99.4376098418278,98.7671715392742,98.0278032884705,97.4280460562869,98.7399770904926,102.422535211268,107.843137254902,98.4594636485292,101.019462465246,101.499944024908,101.363352242863,104.488079368637,99.3422021225453,99.5533048877003	0.0159
504610	98.6	82.5	16.1	-0.568	230	-2220	2680	3.64	FALSE	inactive	IC50 larger than highest measured concentration	7.68961	0.568083	41.6229	99.6457	230.005	50,50,25,25,12.5,6.25,6.25,3.125,3.125,1.5625,1.5625,0.78125,0.78125,0.390625,0.390625,0.1953125,0.1953125	69.1511047418472,87.3754152823921,48.5339409384633,104.147627416521,88.4114124691792,86.9172684341302,91.1400508860205,100.801832760596,89.1267605633804,115.032679738562,92.1263500545828,99.3512511584801,96.387212407184,101.210569346473,98.8933334479687,97.7795978623441,100.16690944101	0.0526
504617	95.7	99.2	3.44	-1.24	1310			2.88	FALSE	inactive	IC50 larger than highest measured concentration	2.77385	1.23864	296.59	95.7159	1314.98	50,50,25,25,12.5,6.25,6.25,3.125,3.125,1.5625,1.5625,0.78125,0.78125,0.390625,0.390625,0.1953125,0.1953125	70.7189526367945,98.6710963455148,94.4207244622872,101.687170474517,97.2173300457909,90.5010675642284,94.4258916846738,94.3871706758304,99.6056338028168,98.3660130718953,97.2611558551461,94.1612604263207,96.4554022613938,94.7012203183039,96.8028866484812,95.6409524376247,95.0878965335707	0.557
504619	101	98.6	2.02	-0.0521	1.83	-242	246	5.74	FALSE	inactive	Response Difference lower than 25%	4.09612	0.0521018	85.8133	113.832	1.82916	50,50,25,25,12.5,6.25,6.25,3.125,3.125,1.5625,1.5625,0.78125,0.78125,0.390625,0.390625,0.1953125,0.1953125	92.6823420280589,96.9269102990034,96.2987879033058,107.381370826011,103.698485382177,97.3111017356074,95.498104613088,98.7399770904926,104.676056338028,101.307189542484,102.652720033192,96.3855421686747,98.5681128191827,102.271285407362,101.229132971739,98.9311720534854,99.6084634121927	0.902
504682	96.4	85.6	10.8	-1.9	81.8	-221	385	4.09	FALSE	inactive	IC50 larger than highest measured concentration	3.1276	1.89756	58.1516	96.3532	81.7582	50,50,25,25,12.5,6.25,6.25,3.125,3.125,1.5625,1.5625,0.78125,0.78125,0.390625,0.390625,0.1953125,0.1953125	81.6988193102064,88.9534883720931,94.9898682591336,93.2513181019332,91.1588587530819,94.2646393823976,93.4974507028604,97.3654066437572,103.098591549296,98.6928104575163,95.3782796381731,95.8294717330861,94.5462858586967,93.4887061041519,97.2945718284048,97.5332847036454,96.2593481583739	0.000977
504721	103	66.9	36.3	-0.542	0.0702	-0.206	0.347	7.15	FALSE	inconclusive	IC50 lower than lowest measured concentration	14.9573	0.541639	63.949	171.61	0.0701622	50,50,25,25,12.5,6.25,6.25,3.125,3.125,1.5625,1.5625,0.78125,0.78125,0.390625,0.390625,0.1953125,0.1953125	57.9079178444302,71.6777408637875,14.4318962699326,75.4657293497363,75.8717858400846,67.74213662025,81.2075635151557,95.9908361970217,41.6901408450705,95.4248366013072,59.4349173027655,96.014828544949,84.1171619630961,101.211110955194,93.8516958649938,101.068480273218,101.450529437436	0.0212
504729	96.9	101	3.74	-0.254	12200000	-366000000	391000000	-1.09	FALSE	inactive	IC50 larger than highest measured concentration	10.2418	0.253579	217.196	95.6781	1.22453e+07	50,50,25,25,12.5,6.25,6.25,3.125,3.125,1.5625,1.5625,0.78125,0.78125,0.390625,0.390625,0.1953125,0.1953125	89.8056302234141,106.72757475083,41.1326461455829,109.349736379614,105.459668897499,100.178782044408,101.57145270549,104.238258877434,76.0563380281692,105.228758169935,82.3704221695431,98.9805375347544,90.7973734935218,98.183567443703,100.061233209854,106.331692359946,97.822517873204	0.949
