# Supplementary material for: 7,8-Dihydroxyflavone is a direct inhibitor of human and murine pyridoxal phosphatase
Source: eLife. 2024 Jun 10;13:RP93094. doi: 10.7554/eLife.93094 (PMC11164532; doi:10.7554/eLife.93094)
Supplement: Figure 2—source data 1. — Effect of 7,8-dihydroxyflavone (7,8-DHF) on murine and human pyridoxal 5’-phosphate phosphatase (PDXP) activity. Data are OD values and normalized data of malachite green assays, using pyridoxal 5’-phosphate (PLP) as a PDXP substrate. [file elife-93094-fig2-data1.xlsx]

## Sheet: to Fig 2a
	effect of 7,8-DHF on murine PDXP															effect of 7,8-DHF on human PDXP
	Exp1															Exp1
	7,8 DHF [µM]	10	7.5	5	3.75	2.5	1.875	1.25	0.9375	0.625	0.46875	0.3125	0			7,8 DHF [µM]	10	7.5	0	5	3.75	2.5	1.875	1.25	0.9375	0.625	0.46875	0.3125	0.234375	0.15625	0
	Log 7,8 DHF [M]	-5	-5.12494	-5.30103	-5.42597	-5.60206	-5.727	-5.90309	-6.02803	-6.20412	-6.32906	-6.50515				Log 7,8 DHF [M]	-5	-5.12494		-5.30103	-5.42597	-5.60206	-5.727	-5.90309	-6.02803	-6.20412	-6.32906	-6.50515	-6.63009	-6.80618
	PDXP	0.109	0.113	0.116	0.113	0.129	0.134	0.152	0.169	0.172	0.183	0.189	0.2			PDXP	0.124	0.129	0.171	0.103	0.108	0.108	0.122	0.122	0.137	0.135	0.146	0.144	0.149	0.149	0.152
	PDXP	0.112	0.11	0.115	0.118	0.118	0.132	0.142	0.144	0.161	0.169	0.171	0.185			PDXP	0.122	0.124	0.172	0.105	0.109	0.105	0.122	0.121	0.134	0.133	0.143	0.138	0.144	0.14	0.148
	Background	0.053	0.06	0.062	0.063	0.063	0.066	0.067	0.067	0.065	0.07	0.069	0.07			Background	0.066	0.067	0.069	0.055	0.063	0.059	0.058	0.058	0.06	0.063	0.061	0.063	0.065	0.064	0.063
	Background	0.06	0.059	0.06	0.063	0.061	0.061	0.062	0.063	0.06	0.062	0.062	0.06			Background	0.068	0.069	0.069	0.057	0.056	0.058	0.057	0.058	0.059	0.059	0.054	0.056	0.058	0.055	0.051
	PDXP-Background	0.054	0.052	0.0545	0.0525	0.0615	0.0695	0.0825	0.0915	0.104	0.11	0.1145	0.1275			PDXP-Back	0.056	0.0585	0.1025	0.048	0.049	0.048	0.0645	0.0635	0.076	0.073	0.087	0.0815	0.085	0.085	0.093
	normalized	0.423529	0.407843	0.427451	0.411765	0.482353	0.545098	0.647059	0.717647	0.815686	0.862745	0.898039	1			normalized	0.546341	0.570732	1	0.516129	0.526882	0.516129	0.693548	0.682796	0.817204	0.784946	0.935484	0.876344	0.913978	0.913978	1
	Exp2															Exp2
	7,8 DHF [µM]	10	7.5	5	3.75	2.5	1.875	1.25	0.9375	0.625	0.46875	0.3125	0			7,8 DHF [µM]	10	7.5	0	5	3.75	2.5	1.875	1.25	0.9375	0.625	0.46875	0.3125	0.234375	0.15625	0
	Log 7,8 DHF [M]	-5	-5.12494	-5.30103	-5.42597	-5.60206	-5.727	-5.90309	-6.02803	-6.20412	-6.32906	-6.50515				Log 7,8 DHF [M]	-5	-5.12494		-5.30103	-5.42597	-5.60206	-5.727	-5.90309	-6.02803	-6.20412	-6.32906	-6.50515	-6.63009	-6.80618
	PDXP	0.132	0.125	0.129	0.129	0.148	0.162	0.17	0.17	0.201	0.202	0.202	0.211			PDXP	0.127	0.129	0.167	0.113	0.123	0.118	0.133	0.14	0.158	0.168	0.179	0.182	0.183	0.191	0.194
	PDXP	0.139	0.13	0.131	0.128	0.119	0.156	0.173	0.181	0.191	0.189	0.194	0.188			PDXP	0.121	0.125	0.173	0.115	0.119	0.105	0.13	0.133	0.154	0.151	0.174	0.158	0.168	0.185	0.184
	Background	0.05	0.059	0.067	0.066	0.059	0.062	0.07	0.069	0.063	0.066	0.07	0.07			Background	0.072	0.071	0.069	0.051	0.05	0.05	0.051	0.049	0.052	0.055	0.051	0.053	0.053	0.052	0.047
	Background	0.055	0.058	0.07	0.07	0.062	0.065	0.073	0.069	0.061	0.064	0.063	0.057			Background	0.066	0.064	0.058	0.046	0.05	0.052	0.054	0.056	0.055	0.061	0.056	0.057	0.057	0.055	0.055
	PDXP-Background	0.083	0.069	0.0615	0.0605	0.073	0.0955	0.1	0.1065	0.134	0.1305	0.1315	0.136			PDXP-Back	0.055	0.0595	0.1065	0.0655	0.071	0.0605	0.079	0.084	0.1025	0.1015	0.123	0.115	0.1205	0.1345	0.138
	normalized	0.610294	0.507353	0.452206	0.444853	0.536765	0.702206	0.735294	0.783088	0.985294	0.959559	0.966912	1			normalized	0.516432	0.558685	1	0.474638	0.514493	0.438406	0.572464	0.608696	0.742754	0.735507	0.891304	0.833333	0.873188	0.974638	1
	Exp3															Exp3
	7,8 DHF [µM]	10	7.5	5	3.75	2.5	1.875	1.25	0.9375	0.625	0.46875	0.3125	0			7,8 DHF [µM]	10	7.5	0	5	3.75	2.5	1.875	1.25	0.9375	0.625	0.46875	0.3125	0.234375	0.15625	0
	Log 7,8 DHF [M]	-5	-5.12494	-5.30103	-5.42597	-5.60206	-5.727	-5.90309	-6.02803	-6.20412	-6.32906	-6.50515				Log 7,8 DHF [M]	-5	-5.12494		-5.30103	-5.42597	-5.60206	-5.727	-5.90309	-6.02803	-6.20412	-6.32906	-6.50515	-6.63009	-6.80618
	PDXP	0.128	0.131	0.133	0.153	0.15	0.189	0.186	0.214	0.21	0.235	0.235	0.239			PDXP	0.129	0.132	0.186	0.114	0.119	0.113	0.135	0.134	0.15	0.148	0.153	0.166	0.129	0.173	0.177
	PDXP	0.126	0.143	0.13	0.156	0.153	0.189	0.181	0.212	0.225	0.234	0.23	0.238			PDXP	0.132	0.134	0.18	0.111	0.112	0.119	0.132	0.13	0.149	0.154	0.161	0.16	0.164	0.167	0.17
	Background	0.051	0.056	0.061	0.062	0.061	0.063	0.065	0.066	0.063	0.063	0.065	0.067			Background	0.066	0.068	0.066	0.05	0.059	0.061	0.06	0.063	0.064	0.066	0.062	0.063	0.064	0.063	0.062
	Background	0.056	0.057	0.06	0.065	0.063	0.066	0.067	0.068	0.062	0.058	0.058	0.054			Background	0.061	0.059	0.058	0.055	0.056	0.056	0.061	0.063	0.063	0.065	0.061	0.06	0.06	0.056	0.049
	PDXP-Background	0.0735	0.0805	0.071	0.091	0.0895	0.1245	0.1175	0.146	0.155	0.174	0.171	0.178			PDXP-Back	0.067	0.0695	0.121	0.06	0.058	0.0575	0.073	0.069	0.086	0.0855	0.0955	0.1015	0.102	0.1105	0.118
	normalized	0.412921	0.452247	0.398876	0.511236	0.502809	0.699438	0.660112	0.820225	0.870787	0.977528	0.960674	1			normalized	0.553719	0.57438	1	0.508475	0.491525	0.487288	0.618644	0.584746	0.728814	0.724576	0.809322	0.860169	0.864407	0.936441	1
	Exp4
	7,8 DHF [µM]	10	7.5	5	3.75	2.5	1.875	1.25	0.9375	0.625	0.46875	0.3125	0
	Log 7,8 DHF [M]	-5	-5.12494	-5.30103	-5.42597	-5.60206	-5.727	-5.90309	-6.02803	-6.20412	-6.32906	-6.50515
	PDXP	0.144	0.142	0.142	0.147	0.158	0.174	0.192	0.194	0.224	0.227	0.238	0.246
	PDXP	0.145	0.14	0.137	0.146	0.16	0.175	0.183	0.2	0.22	0.224	0.233	0.237
	Background	0.056	0.064	0.061	0.065	0.065	0.068	0.067	0.07	0.067	0.066	0.068	0.069
	Background	0.059	0.065	0.064	0.066	0.062	0.063	0.062	0.068	0.065	0.064	0.064	0.061
	PDXP-Background	0.087	0.0765	0.077	0.081	0.0955	0.109	0.123	0.128	0.156	0.1605	0.1695	0.1765
	normalized	0.492918	0.433428	0.436261	0.458924	0.541076	0.617564	0.696884	0.725212	0.883853	0.909348	0.96034	1
