# Supplementary material for: 7,8-Dihydroxyflavone is a direct inhibitor of human and murine pyridoxal phosphatase
Source: eLife. 2024 Jun 10;13:RP93094. doi: 10.7554/eLife.93094 (PMC11164532; doi:10.7554/eLife.93094)
Supplement: Figure 2—source data 2. — Effects of the indicated flavones on the phosphatase activity of murine pyridoxal 5’-phosphate phosphatase (PDXP). Data are OD values and normalized data of malachite green assays, using pyridoxal 5’-phosphate (PLP) as a PDXP substrate. [file elife-93094-fig2-data2.xlsx]

## Sheet: to Fig 2b
	Effects of different flavones on the phosphatase activity of murine PDXP
	Exp1											7,8-DHF
		Flavone [µM]	40	20	10	5	1.25	0			Exp1
		Log flavone [M]	-4.39794	-4.69897	-5	-5.30103	-5.90309					7,8 DHF [µM]	40	20	0	10	7.5	5	3.75	2.5	1.875	1.25	0.9375	0.625	0.46875	0.3125	0
			flavone									Log 7,8 DHF [M]	-4.39794	-4.69897		-5	-5.12494	-5.30103	-5.42597	-5.60206	-5.727	-5.90309	-6.02803	-6.20412	-6.32906	-6.50515
		PDXP	0.276	0.266	0.26	0.246	0.257	0.247				PDXP	0.14	0.137	0.204	0.184	0.175	0.185	0.185	0.207	0.216	0.239	0.245	0.269	0.274	0.283	0.29
		PDXP	0.247	0.26	0.258	0.252	0.255	0.256				PDXP	0.148	0.139	0.211	0.175	0.169	0.169	0.177	0.201	0.215	0.228	0.23	0.253	0.251	0.258	0.278
		Background	0.056	0.062	0.064	0.066	0.068	0.068				Background	0.083	0.087	0.098	0.049	0.053	0.057	0.054	0.059	0.062	0.064	0.059	0.062	0.063	0.063	0.063
		Background	0.066	0.06	0.061	0.058	0.064	0.064				Background	0.081	0.085	0.094	0.052	0.051	0.054	0.055	0.057	0.056	0.058	0.053	0.056	0.056	0.064	0.05
			3,7 dihydroxyflavone									PDXP-Background	0.062	0.052	0.1115	0.129	0.12	0.1215	0.1265	0.146	0.1565	0.1725	0.1815	0.202	0.203	0.207	0.2275
		PDXP	0.261	0.255	0.257	0.253	0.259	0.26				normalized	0.556054	0.466368	1	0.567033	0.527473	0.534066	0.556044	0.641758	0.687912	0.758242	0.797802	0.887912	0.892308	0.90989	1
		PDXP	0.248	0.25	0.25	0.257	0.242	0.264
		Background	0.077	0.069	0.07	0.068	0.071	0.07			Exp2
		Background	0.065	0.065	0.065	0.062	0.065	0.059				7,8 DHF [µM]	40	20	0	10	7.5	5	3.75	2.5	1.875	1.25	0.9375	0.625	0.46875	0.3125	0
			5,7 dihydroxyflavone									Log 7,8 DHF [M]	-4.39794	-4.69897		-5	-5.12494	-5.30103	-5.42597	-5.60206	-5.727	-5.90309	-6.02803	-6.20412	-6.32906	-6.50515
		PDXP	0.281	0.259	0.264	0.254	0.255	0.255				PDXP	0.177	0.175	0.233	0.167	0.165	0.167	0.174	0.186	0.199	0.207	0.221	0.239	0.24	0.254	0.261
		PDXP	0.281	0.287	0.249	0.257	0.263	0.254				PDXP	0.174	0.175	0.267	0.17	0.163	0.165	0.17	0.181	0.199	0.203	0.217	0.232	0.24	0.25	0.268
		Background	0.061	0.071	0.068	0.068	0.064	0.068				Background	0.066	0.084	0.078	0.05	0.058	0.057	0.059	0.06	0.062	0.063	0.064	0.064	0.065	0.063	0.062
		Background	0.068	0.066	0.065	0.063	0.064	0.066				Background	0.087	0.076	0.087	0.059	0.057	0.056	0.058	0.056	0.058	0.058	0.058	0.057	0.06	0.056	0.053
			3,5,7 trihydroxyflavone									PDXP-Background	0.099	0.095	0.1675	0.114	0.1065	0.1095	0.1135	0.1255	0.139	0.1445	0.158	0.175	0.1775	0.1925	0.207
		PDXP	0.271	0.254	0.263	0.254	0.257	0.251				normalized	0.591045	0.567164	1	0.550725	0.514493	0.528986	0.548309	0.60628	0.671498	0.698068	0.763285	0.845411	0.857488	0.929952	1
		PDXP	0.252	0.256	0.251	0.248	0.25	0.259
		Background	0.085	0.076	0.075	0.072	0.071	0.069			Exp3
		Background	0.078	0.071	0.065	0.066	0.063	0.06				7,8 DHF [µM]	40	20	0	10	7.5	5	3.75	2.5	1.875	1.25	0.9375	0.625	0.46875	0.3125	0
			5,6,7 trihydroxyflavone									Log 7,8 DHF [M]	-4.39794	-4.69897		-5	-5.12494	-5.30103	-5.42597	-5.60206	-5.727	-5.90309	-6.02803	-6.20412	-6.32906	-6.50515
		PDXP	0.249	0.24	0.241	0.238	0.237	0.23				PDXP	0.187	0.176	0.26	0.159	0.171	0.177	0.189	0.199	0.212	0.235	0.243	0.258	0.276	0.281	0.286
		PDXP	0.242	0.229	0.235	0.227	0.236	0.226				PDXP	0.197	0.18	0.247	0.17	0.17	0.173	0.174	0.196	0.21	0.223	0.231	0.236	0.248	0.258	0.274
		Background	0.073	0.071	0.073	0.074	0.074	0.077				Background	0.077	0.084	0.079	0.051	0.057	0.059	0.06	0.061	0.063	0.062	0.062	0.064	0.065	0.064	0.063
		Background	0.077	0.069	0.068	0.069	0.069	0.066				Background	0.085	0.089	0.09	0.066	0.066	0.059	0.068	0.063	0.071	0.056	0.056	0.056	0.057	0.056	0.052
												PDXP-Background	0.111	0.0915	0.169	0.106	0.109	0.116	0.1175	0.1355	0.144	0.17	0.178	0.187	0.201	0.2095	0.2225
		PDXP-Background										normalized	0.656805	0.54142	1	0.476404	0.489888	0.521348	0.52809	0.608989	0.647191	0.764045	0.8	0.840449	0.903371	0.941573	1
		flavone	0.2005	0.202	0.1965	0.187	0.19	0.1855
		3,7 dihydroxyflavone	0.1835	0.1855	0.186	0.19	0.1825	0.1975
		5,7 dihydroxyflavone	0.2165	0.2045	0.19	0.19	0.195	0.1875
		3,5,7 trihydroxyflavone	0.18	0.1815	0.187	0.182	0.1865	0.1905				3,7,8,4'-tetrahydroxyflavone
		5,6,7 trihydroxyflavone	0.1705	0.1645	0.1675	0.161	0.165	0.1565			Exp1
												Flavone [µM]	40	20	10	5	2.5	1.25	0.625			0
		Normalized										Log flavone [M]	-4.39794	-4.69897	-5	-5.30103	-5.60206	-5.90309	-6.20412			-7
		flavone	1.08086	1.08895	1.0593	1.00809	1.02426	1				PDXP	0.22	0.182	0.165	0.164	0.187	0.207	0.219			0.221
		3,7 dihydroxyflavone	0.929114	0.939241	0.941772	0.962025	0.924051	1				PDXP	0.226	0.177	0.158	0.17	0.192	0.196	0.213			0.225
		5,7 dihydroxyflavone	1.15467	1.09067	1.01333	1.01333	1.04	1				Background	0.15	0.103	0.084	0.08	0.077	0.078	0.078			0.084
		3,5,7 trihydroxyflavone	0.944882	0.952756	0.981627	0.955381	0.979003	1				Background	0.147	0.103	0.082	0.08	0.078	0.071	0.072			0.069
		5,6,7 trihydroxyflavone	1.08946	1.05112	1.07029	1.02875	1.05431	1				PDXP-Background	0.0745	0.0765	0.0785	0.087	0.112	0.127	0.141			0.1465
												normalized	0.508532	0.522184	0.535836	0.593857	0.764505	0.866894	0.962457			1
	Exp2										Exp2
		Flavone [µM]	40	20	10	5	1.25	0				Flavone [µM]	40	20	10	5	2.5	1.25	0.625			0
		Log flavone [M]	-4.39794	-4.69897	-5	-5.30103	-5.90309					Log flavone [M]	-4.39794	-4.69897	-5	-5.30103	-5.60206	-5.90309	-6.20412			-7
			flavone									PDXP	0.215	0.183	0.177	0.204	0.218	0.23	0.235			0.245
		PDXP	0.242	0.207	0.225	0.223	0.223	0.22				PDXP	0.214	0.178	0.176	0.197	0.206	0.216	0.235			0.229
		PDXP	0.207	0.214	0.226	0.224	0.233	0.226				Background	0.14	0.101	0.086	0.085	0.083	0.082	0.082			0.086
		Background	0.061	0.063	0.067	0.069	0.069	0.07				Background	0.136	0.095	0.08	0.079	0.082	0.08	0.077			0.075
		Background	0.067	0.064	0.067	0.068	0.069	0.069				PDXP-Background	0.0765	0.0825	0.0935	0.1185	0.13	0.143	0.158			0.162
			3,7 dihydroxyflavone									normalized	0.472222	0.509259	0.57716	0.731481	0.802469	0.882716	0.975309			1
		PDXP	0.231	0.228	0.229	0.23	0.231	0.232
		PDXP	0.239	0.237	0.234	0.237	0.23	0.244			Exp3
		Background	0.073	0.07	0.072	0.073	0.072	0.073				Flavone [µM]	40	20	10	5	2.5	1.25	0.625	0.3125	0.15625	0
		Background	0.072	0.069	0.07	0.064	0.065	0.059				Log flavone [M]	-4.39794	-4.69897	-5	-5.30103	-5.60206	-5.90309	-6.20412			-7
			5,7 dihydroxyflavone									PDXP	0.201	0.185	0.189	0.219	0.242	0.246	0.261	0.273		0.264
		PDXP	0.237	0.223	0.229	0.225	0.216	0.221				PDXP	0.206	0.184	0.2	0.214	0.234	0.247	0.253	0.266		0.263
		PDXP	0.25	0.252	0.238	0.246	0.235	0.23				Background	0.119	0.094	0.09	0.09	0.09	0.093	0.092	0.089		0.089
		Background	0.062	0.07	0.066	0.069	0.068	0.073				Background	0.12	0.096	0.085	0.084	0.086	0.087	0.087	0.086		0.081
		Background	0.069	0.068	0.073	0.069	0.067	0.067				PDXP-Background	0.084	0.0895	0.107	0.1295	0.15	0.1565	0.1675	0.182		0.1785
			3,5,7 trihydroxyflavone									normalized	0.470588	0.501401	0.59944	0.72549	0.840336	0.876751	0.938375	1.01961		1
		PDXP	0.239	0.227	0.226	0.221	0.223	0.222
		PDXP	0.241	0.234	0.232	0.232	0.229	0.233			Exp4
		Background	0.079	0.077	0.076	0.078	0.073	0.069				Flavone [µM]	40	20	10	5	2.5	1.25	0.625	0.3125	0.15625	0
		Background	0.077	0.07	0.073	0.071	0.066	0.058				Log flavone [M]	-4.39794	-4.69897	-5	-5.30103	-5.60206	-5.90309	-6.20412			-7
			5,6,7 trihydroxyflavone									PDXP	0.173	0.154	0.148	0.157	0.17	0.179	0.182	0.195	0.191	0.199
		PDXP	0.244	0.235	0.24	0.23	0.231	0.229				PDXP	0.174	0.157	0.143	0.159	0.161	0.175	0.176	0.191	0.186	0.196
		PDXP	0.23	0.227	0.223	0.219	0.217	0.218				Background	0.128	0.107	0.092	0.088	0.088	0.087	0.087	0.089	0.087	0.085
		Background	0.066	0.076	0.075	0.078	0.075	0.073				Background	0.134	0.11	0.093	0.086	0.081	0.083	0.081	0.081	0.078	0.072
		Background	0.073	0.07	0.071	0.069	0.069	0.066				PDXP-Background	0.0425	0.047	0.053	0.071	0.081	0.092	0.095	0.108	0.106	0.119
												normalized	0.357143	0.394958	0.445378	0.596639	0.680672	0.773109	0.798319	0.907563	0.890756	1
		PDXP-Background
		flavone	0.1605	0.147	0.1585	0.155	0.159	0.1535			Exp5
		3,7 dihydroxyflavone	0.1625	0.163	0.1605	0.165	0.162	0.172				Flavone [µM]	40	20	10	5	2.5	1.25	0.625	0.3125	0.15625	0
		5,7 dihydroxyflavone	0.178	0.1685	0.164	0.1665	0.158	0.1555				Log flavone [M]	-4.39794	-4.69897	-5	-5.30103	-5.60206	-5.90309	-6.20412	-6.50515	-6.80618	-7
		3,5,7 trihydroxyflavone	0.162	0.157	0.1545	0.152	0.1565	0.164				PDXP	0.188	0.164	0.162	0.17	0.191			0.206	0.208	0.209
		5,6,7 trihydroxyflavone	-0.092	-0.082	-0.0865	-0.0865	-0.0885	-0.09325				PDXP	0.181	0.161	0.153	0.164	0.184			0.207	0.207	0.205
												Background	0.124	0.098	0.085	0.085	0.085			0.089	0.084	0.084
		Normalized										Background	0.122	0.094	0.085	0.083	0.08			0.082	0.079	0.079
		flavone	1.0456	0.957655	1.03257	1.00977	1.03583	1				PDXP-Background	0.0615	0.0665	0.0725	0.083	0.105			0.121	0.126	0.1255
		3,7 dihydroxyflavone	0.944767	0.947674	0.93314	0.959302	0.94186	1				normalized	0.49004	0.52988	0.577689	0.661355	0.836653	0	0	0.964143	1.00398	1
		5,7 dihydroxyflavone	1.14469	1.0836	1.05466	1.07074	1.01608	1
		3,5,7 trihydroxyflavone	0.987805	0.957317	0.942073	0.926829	0.954268	1			Exp6
		5,6,7 trihydroxyflavone	0.986595	0.879357	0.927614	0.927614	0.949062	1				Flavone [µM]	40	20	10	5	2.5	1.25	0.625	0.3125	0.15625	0
												Log flavone [M]	-4.39794	-4.69897	-5	-5.30103	-5.60206	-5.90309	-6.20412	-6.50515	-6.80618	-7
												PDXP	0.166	0.155	0.158	0.169	0.179	0.186	0.181	0.193	0.183	0.194
	Exp3											PDXP	0.174	0.165	0.166	0.174	0.173	0.193	0.177	0.19	0.178	0.19
		Flavone [µM]	40	20	10	5	1.25	0				Background	0.118	0.097	0.089	0.09	0.09	0.089	0.088	0.09	0.086	0.083
		Log flavone [M]	-4.39794	-4.69897	-5	-5.30103	-5.90309					Background	0.122	0.104	0.093	0.093	0.091	0.088	0.091	0.086	0.085	0.073
			flavone									PDXP-Background	0.05	0.0595	0.071	0.08	0.0855	0.101	0.0895	0.1035	0.095	0.114
		PDXP	0.214	0.224	0.231	0.23	0.226	0.228				normalized	0.438596	0.52193	0.622807	0.701754	0.75	0.885965	0.785088	0.907895	0.833333	1
		PDXP	0.213	0.218	0.226	0.225	0.223	0.223
		Background	0.06	0.066	0.068	0.067	0.067	0.07
		Background	0.065	0.065	0.066	0.066	0.066	0.065
			3,7 dihydroxyflavone
		PDXP	0.229	0.22	0.231	0.231	0.226	0.231
		PDXP	0.224	0.214	0.22	0.219	0.212	0.215
		Background	0.074	0.07	0.072	0.072	0.072	0.073
		Background	0.069	0.067	0.068	0.067	0.065	0.061
			5,7 dihydroxyflavone
		PDXP	0.236	0.232	0.233	0.229	0.224	0.228
		PDXP	0.242	0.232	0.218	0.224	0.226	0.224
		Background	0.06	0.065	0.067	0.068	0.07	0.073
		Background	0.067	0.067	0.069	0.068	0.069	0.067
			3,5,7 trihydroxyflavone
		PDXP	0.224	0.219	0.22	0.205	0.214	0.228
		PDXP	0.211	0.204	0.21	0.202	0.204	0.209
		Background	0.075	0.071	0.073	0.075	0.073	0.072
		Background	0.069	0.065	0.066	0.067	0.066	0.06
			5,6,7 trihydroxyflavone
		PDXP	0.233	0.227	0.224	0.208	0.196	0.207
		PDXP	0.241	0.226	0.216	0.202	0.203	0.215
		Background	0.069	0.067	0.068	0.063	0.063	0.074
		Background	0.065	0.066	0.067	0.065	0.066	0.064
		PDXP-Background
		flavone	0.151	0.1555	0.1615	0.161	0.158	0.158
		3,7 dihydroxyflavone	0.155	0.1485	0.1555	0.1555	0.1505	0.156
		5,7 dihydroxyflavone	0.1755	0.166	0.1575	0.1585	0.1555	0.156
		3,5,7 trihydroxyflavone	0.1455	0.1435	0.1455	0.1325	0.1395	0.1525
		5,6,7 trihydroxyflavone	0.17	0.16	0.1525	0.141	0.135	0.142
		Normalized
		flavone	0.955696	0.984177	1.02215	1.01899	1	1
		3,7 dihydroxyflavone	0.99359	0.951923	0.996795	0.996795	0.964744	1
		5,7 dihydroxyflavone	1.125	1.0641	1.00962	1.01603	0.996795	1
		3,5,7 trihydroxyflavone	0.954098	0.940984	0.954098	0.868852	0.914754	1
		5,6,7 trihydroxyflavone	1.19718	1.12676	1.07394	0.992958	0.950704	1
