# Supplementary material for: 7,8-Dihydroxyflavone is a direct inhibitor of human and murine pyridoxal phosphatase
Source: eLife. 2024 Jun 10;13:RP93094. doi: 10.7554/eLife.93094 (PMC11164532; doi:10.7554/eLife.93094)
Supplement: Figure 2—source data 3. — Data of the association and dissociation curves for fitting. [file elife-93094-fig2-data3.xlsx]

## Sheet: to Fig 2c
BLI measurements with 7,8-DHF and murine PDXP
*_ass = association curves for fitting				Exp1_ass								Exp1_diss									Exp2_ass								Exp2_diss									Exp3_ass								Exp3_diss
*_diss = dissociation curves for fitting
				Time	Data2	Data4	Data6	Data8	Data10	Data12		Time	Data2	Data4	Data6	Data8	Data10	Data12			Time	Data3	Data5	Data7	Data9	Data11	Data13		Time	Data3	Data5	Data7	Data9	Data11	Data13			Time	Data2	Data4	Data6	Data8	Data10	Data12		Time	Data2	Data4	Data6
7,8-DHF concentrations:				0	0.00728738	0.00516427	-0.00208052	-0.00524499	-0.00658607	-0.0060378		0	0.0344507	0.0577105	0.101678	0.125772	0.126434	0.149623			0	0.00246261	-0.00130899	-0.0118336	-0.00101254	0.0120541	-0.00597625		0	0.030383	0.0569935	0.0964785	0.123244	0.138491	0.136648			0	-0.00564361	0.00836375	-0.00583836	0.0138235	0.00536217	-0.00033464		0	0.018205	0.0542563	0.0712277
Data1 = 0 µM				0.2	0.00758547	0.00566902	-0.00061308	-0.00427179	-0.003698	-0.00157595		0.2	0.0339747	0.0584653	0.100541	0.124073	0.123488	0.145765			0.2	0.00193367	-0.00094316	-0.00990746	0.00097309	0.0142127	-0.00374053		0.2	0.0301818	0.0571925	0.0961864	0.121692	0.135617	0.134712			0.2	-0.00628702	0.00850378	-0.00545017	0.0134603	0.00546252	-0.00047528		0.2	0.0194786	0.0525041	0.0721732
Data2 = 0.7813 µM				0.4	0.00674554	0.0059386	-0.00082876	-0.00237423	-0.00119499	0.00253652		0.4	0.0330609	0.0583052	0.0995068	0.121759	0.121107	0.14195			0.4	0.00129616	-0.00019814	-0.00779513	0.00344581	0.0172156	-0.00070228		0.4	0.0301913	0.0569303	0.0952118	0.120203	0.132156	0.131929			0.4	-0.00636151	0.00842694	-0.00522294	0.0136386	0.00597635	-0.00108622		0.4	0.0209055	0.0514329	0.0725198
Data3 = 0.7813 µM				0.6	0.00610888	0.00713985	0.00065485	0.00013128	0.0023962	0.00737636		0.6	0.0325077	0.0576492	0.0970163	0.119204	0.118102	0.137837			0.6	0.00054895	0.00040586	-0.00599413	0.00659086	0.0193871	0.00304071		0.6	0.0301996	0.0559327	0.09436	0.117837	0.128826	0.129212			0.6	-0.00602033	0.00852605	-0.00442143	0.0129561	0.00638217	-0.00096966		0.6	0.021564	0.0507497	0.0728813
Data4 = 1.56 µM				0.8	0.00610977	0.008569	0.00260655	0.00280576	0.00589581	0.0131532		0.8	0.0323214	0.0572026	0.0950273	0.116218	0.115161	0.133047			0.8	0.00081274	0.0009564	-0.00378331	0.0103516	0.0222061	0.00693359		0.8	0.0303267	0.0552217	0.0931632	0.114989	0.124901	0.126129			0.8	-0.0060151	0.00966288	-0.00321664	0.0120344	0.00747454	-7.32E-02		0.8	0.0220816	0.0500929	0.0729035
Data5 = 1.56 µM				1	0.00614187	0.00980949	0.00499075	0.00505175	0.00897227	0.0187164		1	0.0313584	0.056407	0.0927957	0.113461	0.11191	0.128805			1	0.00116096	0.00196673	-0.0024445	0.0137661	0.0248448	0.0106891		1	0.0298378	0.0547579	0.0918642	0.112824	0.121812	0.122674			1	-0.00568016	0.00961729	-0.00206129	0.0119644	0.0084055	0.00138002		1	0.0226778	0.0492143	0.0721506
Data6 = 3.13 µM				1.2	0.00603859	0.0106871	0.00700274	0.00765767	0.0118289	0.0244159		1.2	0.0308234	0.0553302	0.0908144	0.111189	0.109067	0.124922			1.2	0.00074606	0.00282942	-0.00061069	0.0167115	0.0274251	0.014587		1.2	0.0291867	0.0538574	0.0904897	0.11036	0.117415	0.119851			1.2	-0.00403561	0.00937509	-0.00036832	0.0123446	0.00995171	0.00198172		1.2	0.022845	0.0474177	0.072094
Data7 = 3.13 µM				1.4	0.00625235	0.0121136	0.00915247	0.0104764	0.015881	0.029674		1.4	0.0307515	0.0544834	0.0894083	0.108208	0.10594	0.121374			1.4	0.0007209	0.00325026	0.00162089	0.0195539	0.0313592	0.0186369		1.4	0.0288568	0.0536558	0.0892259	0.107963	0.114262	0.116507			1.4	-0.00273597	0.00975019	0.00162332	0.0135929	0.0112107	0.00367093		1.4	0.0228631	0.0462681	0.0706567
Data8 = 6.25 µM				1.6	0.0062697	0.0125753	0.011523	0.013822	0.0191974	0.0344331		1.6	0.0300102	0.0539551	0.0882343	0.104831	0.102743	0.118167			1.6	0.00100177	0.00391146	0.00325353	0.023154	0.0353259	0.0226917		1.6	0.0278136	0.053041	0.0876134	0.105296	0.110855	0.112979			1.6	-0.00227434	0.00965548	0.00282085	0.0145788	0.0128425	0.00544997		1.6	0.0224866	0.0444678	0.0692254
Data9 = 6.25 µM				1.8	0.00611593	0.0138999	0.0137625	0.0173203	0.0225415	0.0380479		1.8	0.0293615	0.0529662	0.0873828	0.101614	0.100359	0.116034			1.8	0.00169165	0.00505917	0.00479806	0.0255494	0.03755	0.0262166		1.8	0.0271563	0.0521698	0.0864192	0.102595	0.107944	0.109266			1.8	-0.00210372	0.00945158	0.00457345	0.0168662	0.0140654	0.00781656		1.8	0.0212395	0.0425009	0.0688014
Data10 = 12.5 µM				2	0.00553859	0.0149729	0.015911	0.0206422	0.0247739	0.0415038		2	0.0288508	0.051911	0.0866255	0.0995248	0.0985126	0.113656			2	0.00131527	0.005932	0.0052391	0.0276554	0.0407546	0.0298595		2	0.0270629	0.0511091	0.0840092	0.100751	0.106073	0.106994			2	-0.00170803	0.00929869	0.00609501	0.0181483	0.0164246	0.0105703		2	0.0202432	0.0417401	0.0664045
Data11 = 12.5 µM				2.2	0.00605426	0.0150004	0.0177038	0.0231451	0.0269757	0.0438455		2.2	0.0281156	0.0507562	0.0859676	0.097294	0.0967346	0.11192			2.2	0.00159762	0.00681054	0.00561619	0.0289556	0.0426688	0.0332305		2.2	0.0272828	0.0506482	0.0828813	0.0991099	0.104125	0.104079			2.2	-0.00111127	0.00808265	0.0081132	0.0201766	0.0172975	0.0128083		2.2	0.0190093	0.0420629	0.0643831
Data12 = 25 µM				2.4	0.00706518	0.0152069	0.019841	0.0250648	0.0297877	0.0469071		2.4	0.0274909	0.0494277	0.0855653	0.0953586	0.0953439	0.109491			2.4	0.00166694	0.00698095	0.0075034	0.0309913	0.0444625	0.0357796		2.4	0.027747	0.0501121	0.0820998	0.0968356	0.101796	0.102123			2.4	-0.00021377	0.00743165	0.00956709	0.0221998	0.018221	0.0128912		2.4	0.018067	0.0402299	0.0632898
Data13 = 25 µM				2.6	0.00745091	0.015986	0.0214346	0.0272377	0.0328438	0.0499189		2.6	0.0265195	0.049267	0.0845984	0.0935856	0.094278	0.107965			2.6	0.00225127	0.00834145	0.009841	0.0335137	0.0463832	0.038378		2.6	0.0283243	0.0501353	0.0807997	0.0940072	0.101108	0.100267			2.6	0.0003303	0.00718327	0.011074	0.025666	0.0193822	0.0138294		2.6	0.0181637	0.0388957	0.0624872
				2.8	0.00756911	0.0162148	0.023845	0.0284619	0.035197	0.0536241		2.8	0.0262876	0.0486519	0.0835991	0.0922483	0.0925085	0.106332			2.8	0.00264994	0.00876735	0.0106529	0.036874	0.0476052	0.0406589		2.8	0.0281889	0.0484868	0.0792774	0.0920993	0.0995148	0.0992262			2.8	0.00080787	0.00702269	0.0126704	0.0273977	0.0203042	0.0144813		2.8	0.0175983	0.0371911	0.0607338
				3	0.00704311	0.0157992	0.0248247	0.0306525	0.0380303	0.0558791		3	0.0264104	0.0480497	0.0836137	0.0909485	0.0912068	0.103988			3	0.00334692	0.00935393	0.0115526	0.0395232	0.0495589	0.0425484		3	0.028555	0.0489312	0.0781486	0.090722	0.0968547	0.0979687			3	0.00094595	0.00711961	0.0150936	0.0298543	0.0219829	0.0158723		3	0.0170997	0.037726	0.0602275
				3.2	0.00778377	0.016907	0.026191	0.032753	0.0401447	0.0583239		3.2	0.0275239	0.0467897	0.0821446	0.0895162	0.0898281	0.101614			3.2	0.00332119	0.00960499	0.0137652	0.0416543	0.0512905	0.0450892		3.2	0.028673	0.0486901	0.0767359	0.0894698	0.0943375	0.0958458			3.2	-0.00037411	0.00722887	0.0156824	0.0318259	0.0218718	0.0166569		3.2	0.0167379	0.0384492	0.0592343
				3.4	0.00764019	0.0163877	0.0272222	0.0344105	0.0432747	0.0615993		3.4	0.0273809	0.0458929	0.0808114	0.08799	0.0887969	0.100075			3.4	0.00265423	0.0106257	0.0161352	0.0436076	0.0541517	0.0472442		3.4	0.0300189	0.0487478	0.0758978	0.0881225	0.0925542	0.0939064			3.4	-0.00091422	0.00777125	0.0171313	0.0331306	0.0243846	0.0176037		3.4	0.0166933	0.0394955	0.0598056
				3.6	0.00762836	0.0165035	0.0284569	0.0358905	0.0457333	0.0631764		3.6	0.0275274	0.0458171	0.0805022	0.0862374	0.0872026	0.0982754			3.6	0.0035581	0.0112531	0.0171348	0.045337	0.0559402	0.0490396		3.6	0.0300156	0.0481312	0.0742692	0.0862995	0.091454	0.0924107			3.6	-0.00185444	0.00719759	0.0180793	0.0356778	0.0264214	0.0195915		3.6	0.0177715	0.0395084	0.0593417
				3.8	0.00801389	0.0168382	0.0299286	0.0377381	0.047777	0.0649094		3.8	0.0271995	0.0453247	0.079736	0.0842674	0.0858702	0.0955774			3.8	0.00255186	0.0122066	0.0183217	0.0472456	0.0576619	0.0503502		3.8	0.0304603	0.0468615	0.0725317	0.0842958	0.08974	0.0908346			3.8	-0.00271389	0.00767995	0.0192614	0.0368588	0.0275441	0.0206961		3.8	0.0182503	0.0396811	0.0585466
				4	0.00855308	0.0171182	0.032317	0.0398628	0.0500029	0.0660506		4	0.0266652	0.0456601	0.0782426	0.0830953	0.0846654	0.0941652			4	0.00319145	0.0128474	0.020027	0.0488368	0.0594912	0.0521842		4	0.0309323	0.046323	0.0715354	0.0831915	0.0892261	0.0892363			4	-0.00480361	0.00764838	0.0190425	0.0376624	0.0296362	0.0219043		4	0.0187878	0.0396318	0.0573725
				4.2	0.0095717	0.0172945	0.0329464	0.041937	0.0509554	0.0674051		4.2	0.0257334	0.0456413	0.0767642	0.0810729	0.0833592	0.0923425			4.2	0.00239288	0.0132891	0.0211169	0.049864	0.06178	0.0539616		4.2	0.0296155	0.0464248	0.0697699	0.0821661	0.0868249	0.0876144			4.2	-0.00559701	0.00776465	0.018435	0.0391021	0.0312708	0.0233829		4.2	0.0183663	0.0391938	0.0564383
				4.4	0.00902095	0.0180877	0.0324097	0.0446634	0.0517921	0.0686402		4.4	0.0252971	0.0442137	0.0745023	0.0796239	0.0826358	0.0907111			4.4	0.0016586	0.0146113	0.0229513	0.0518838	0.063772	0.0555754		4.4	0.0296931	0.0450008	0.0689258	0.0802947	0.0846965	0.0867954			4.4	-0.00608815	0.00937147	0.0192529	0.039577	0.0335242	0.0249916		4.4	0.0183186	0.0404161	0.0553163
				4.6	0.00985158	0.0195421	0.0346061	0.0468109	0.0536879	0.0708731		4.6	0.0249326	0.0435166	0.0720533	0.0780371	0.081191	0.088544			4.6	0.00118792	0.0149911	0.0237179	0.053509	0.0648415	0.0580695		4.6	0.0290111	0.0444162	0.0678422	0.0779261	0.0826881	0.0861694			4.6	-0.00581834	0.0101475	0.0204423	0.0399192	0.0354949	0.0273612		4.6	0.0176087	0.0408705	0.0547858
				4.8	0.0104183	0.0205626	0.0363778	0.0482701	0.0541883	0.0725189		4.8	0.0241502	0.0431474	0.070907	0.0761044	0.0798448	0.0872547			4.8	0.00233192	0.0153698	0.0250276	0.0555419	0.0661408	0.059444		4.8	0.0280183	0.0433389	0.0663839	0.0766144	0.0812694	0.0849027			4.8	-0.0055772	0.0115291	0.0207958	0.0400932	0.0374824	0.0290826		4.8	0.0175287	0.0403019	0.0547854
				5	0.0115297	0.0215035	0.0382339	0.0493117	0.055064	0.0736797		5	0.0235145	0.0427619	0.069368	0.0751716	0.0783067	0.0858171			5	0.0020298	0.0160938	0.0257588	0.0568193	0.0665079	0.0616063		5	0.0273519	0.043092	0.0653372	0.0759809	0.0801736	0.0837568			5	-0.00472011	0.0112847	0.0218407	0.0414014	0.038853	0.0315461		5	0.0172582	0.0405812	0.0541075
				5.2	0.01239	0.0218063	0.0392697	0.0515085	0.0562063	0.0746835		5.2	0.0235183	0.0426747	0.0689651	0.0741028	0.0773945	0.0853568			5.2	0.00198766	0.0164144	0.0281589	0.0576732	0.0675685	0.0624765		5.2	0.026549	0.0426646	0.064939	0.0740215	0.0778756	0.0826115			5.2	-0.00464272	0.0120418	0.0231595	0.0424201	0.04094	0.0326632		5.2	0.015932	0.0395131	0.0547154
				5.4	0.0125735	0.0225923	0.0398819	0.0533037	0.0580362	0.0756842		5.4	0.0224806	0.0433078	0.0683108	0.0729853	0.0760536	0.0848678			5.4	0.00311519	0.0165881	0.0286477	0.0586457	0.0699532	0.0636863		5.4	0.0261336	0.0426322	0.0649877	0.0728922	0.0776529	0.0812535			5.4	-0.00444944	0.0148505	0.023524	0.044622	0.042378	0.0358		5.4	0.0155965	0.0392967	0.053503
				5.6	0.0121835	0.0228541	0.041312	0.0552404	0.058627	0.0770423		5.6	0.0217131	0.0435067	0.0679901	0.0717065	0.0746309	0.0844301			5.6	0.00385901	0.0169342	0.0296344	0.0606488	0.0708974	0.0655967		5.6	0.0248467	0.0410128	0.0636857	0.0710857	0.0764371	0.0793454			5.6	-0.00490807	0.0161515	0.023401	0.0458837	0.0436807	0.0375995		5.6	0.015222	0.0388724	0.0536932
				5.8	0.012457	0.0238529	0.0413237	0.0562892	0.0604844	0.0779056		5.8	0.0209158	0.0431838	0.0671784	0.0713973	0.0736879	0.0834258			5.8	0.00472187	0.0172007	0.031172	0.0610411	0.070424	0.0669595		5.8	0.0248416	0.0396882	0.0628372	0.0693573	0.0755702	0.0773804			5.8	-0.00386713	0.0168679	0.0247614	0.0471897	0.0442169	0.0396232		5.8	0.0153955	0.0371712	0.0539425
				6	0.012501	0.0235212	0.041732	0.0570738	0.0623325	0.0789208		6	0.0208843	0.0430751	0.0661657	0.0704477	0.0726947	0.0824774			6	0.00551061	0.0183259	0.0312281	0.0612996	0.0718341	0.0691678		6	0.0242483	0.039047	0.0619049	0.0681515	0.0753792	0.0763971			6	-0.00281964	0.0179468	0.0253452	0.0477304	0.0451449	0.0404335		6	0.0150642	0.037177	0.0523935
				6.2	0.0120893	0.023616	0.0434334	0.058336	0.0634615	0.0809869		6.2	0.021454	0.0428956	0.0649751	0.0694132	0.0714122	0.0812679			6.2	0.00629561	0.0186785	0.032846	0.0626636	0.0719308	0.0707788		6.2	0.0247889	0.0398662	0.0612912	0.0670897	0.0736045	0.0753029			6.2	-0.00162922	0.0182726	0.0268573	0.0495871	0.0454517	0.0404863		6.2	0.0140207	0.0362562	0.0514809
				6.4	0.0124855	0.0255006	0.0448332	0.0592252	0.0648212	0.0827358		6.4	0.0218656	0.0422842	0.0639115	0.0684172	0.0696704	0.0799745			6.4	0.00710854	0.0189919	0.0342796	0.0635286	0.0740884	0.0717656		6.4	0.0235283	0.0393315	0.0603445	0.0657399	0.0733576	0.0742845			6.4	-5.89E-02	0.0179627	0.028155	0.0506993	0.0464853	0.0420563		6.4	0.0132784	0.0348352	0.0501673
				6.6	0.0123462	0.0267455	0.0461298	0.06048	0.0658571	0.0841117		6.6	0.0215474	0.0426344	0.0623242	0.0667026	0.068717	0.0777553			6.6	0.0085698	0.0195356	0.0356704	0.0649015	0.076207	0.0730669		6.6	0.0231063	0.0388564	0.0587034	0.0646029	0.072405	0.0742685			6.6	-0.00016534	0.0176211	0.0284672	0.0522666	0.0467919	0.0434284		6.6	0.0129921	0.0343576	0.0484938
				6.8	0.0117759	0.0266184	0.0465153	0.061284	0.0659341	0.0854199		6.8	0.0232733	0.0424393	0.0616677	0.0657143	0.0683589	0.0757438			6.8	0.00949805	0.0192132	0.0353552	0.0664027	0.0770528	0.0741099		6.8	0.022632	0.0388903	0.0569798	0.064167	0.0715189	0.0735014			6.8	-0.00021201	0.0184194	0.0283958	0.0528395	0.0476138	0.0439568		6.8	0.0123766	0.0330341	0.0479799
				7	0.0116712	0.0265933	0.0465882	0.0626213	0.0665584	0.0860543		7	0.0239399	0.0414721	0.0602583	0.0646389	0.0681117	0.0740454			7	0.0112779	0.0186797	0.0367058	0.0676695	0.0789644	0.07513		7	0.0229999	0.0391847	0.0558476	0.0634788	0.07094	0.0731157			7	-0.00057218	0.0181965	0.0287679	0.0544577	0.0482492	0.0452028		7	0.0127859	0.0345933	0.0475313
				7.2	0.0125907	0.0268979	0.0464627	0.0630646	0.0671521	0.087211		7.2	0.0242114	0.0410382	0.0589908	0.0638768	0.0672257	0.0740293			7.2	0.0114603	0.0184803	0.0381505	0.0680558	0.0822251	0.0775435		7.2	0.0229957	0.0384511	0.0541163	0.0622924	0.0703602	0.0722147			7.2	-0.00095537	0.0170305	0.0293574	0.0559566	0.0479796	0.0463383		7.2	0.0134345	0.0349517	0.0469473
				7.4	0.0134866	0.0263885	0.0469532	0.063106	0.0689483	0.0882381		7.4	0.0235852	0.041538	0.0579431	0.0625889	0.0663929	0.072585			7.4	0.0122106	0.0184347	0.0387395	0.0688562	0.084501	0.0784457		7.4	0.0238489	0.038244	0.0535308	0.0615146	0.0701352	0.0719279			7.4	-0.00109318	0.017324	0.0291934	0.0562203	0.0495657	0.0486595		7.4	0.0144172	0.0347982	0.0459639
				7.6	0.0136487	0.0274921	0.0478758	0.0638519	0.0691531	0.0893025		7.6	0.02422	0.0415947	0.0572924	0.0612951	0.0651133	0.0713469			7.6	0.0128096	0.0185298	0.0394023	0.070518	0.086303	0.0791461		7.6	0.0233886	0.0376102	0.0524444	0.0608167	0.0690827	0.0713048			7.6	-0.00147783	0.0167709	0.0300872	0.0564116	0.0504339	0.0503841		7.6	0.0147695	0.034698	0.0457782
				7.8	0.013337	0.0284969	0.048468	0.0645466	0.0691082	0.0911616		7.8	0.0243971	0.0410675	0.055343	0.0607906	0.0642025	0.0698954			7.8	0.0122667	0.0188482	0.0402831	0.0725304	0.0875883	0.0803		7.8	0.0233825	0.0375311	0.0514314	0.0607624	0.0686435	0.0701558			7.8	-0.00168198	0.0177661	0.031157	0.0567679	0.0511901	0.0500355		7.8	0.014826	0.0346632	0.045031
				8	0.0130188	0.029184	0.0490204	0.0662981	0.0702148	0.0929965		8	0.024524	0.0404194	0.0544316	0.0608932	0.0633548	0.0702755			8	0.0134824	0.0191501	0.0410165	0.073322	0.0894532	0.0821667		8	0.0237024	0.037498	0.0510136	0.0600909	0.0679362	0.0692667			8	-0.00228982	0.0173744	0.0315153	0.0573375	0.0522369	0.0507446		8	0.0141938	0.0346576	0.0431266
				8.2	0.0139923	0.0299036	0.049467	0.0664864	0.0712076	0.093993		8.2	0.0241555	0.0395452	0.0544469	0.0598392	0.0618366	0.0686703			8.2	0.0126969	0.0192123	0.0429857	0.0746053	0.0902266	0.0832395		8.2	0.0228997	0.0373022	0.0505419	0.0590411	0.0668674	0.0688543			8.2	-0.00071934	0.0184807	0.0325006	0.0578457	0.0537266	0.05212		8.2	0.0142862	0.0335066	0.0421964
				8.4	0.013578	0.0304805	0.0498434	0.0676023	0.0724246	0.0959495		8.4	0.0248924	0.0389735	0.0546167	0.0596381	0.0607154	0.0682928			8.4	0.0126076	0.0193443	0.0443237	0.0754773	0.0906092	0.0839772		8.4	0.0236306	0.0366833	0.0506412	0.0579194	0.0662603	0.0695437			8.4	-0.00089121	0.0199154	0.0346231	0.0585969	0.0553877	0.0530206		8.4	0.0140245	0.0335058	0.0421018
				8.6	0.0144863	0.0310238	0.0518759	0.0685673	0.0739762	0.097557		8.6	0.0238643	0.0388618	0.0547292	0.0587846	0.0602613	0.0681674			8.6	0.0120705	0.0196458	0.0450173	0.0763233	0.0908232	0.0855523		8.6	0.0238848	0.0361527	0.0502199	0.0575924	0.0659308	0.0682644			8.6	-0.00018823	0.0182885	0.0354023	0.0600103	0.0569998	0.0532324		8.6	0.0135625	0.0329269	0.042281
				8.8	0.0149109	0.0313462	0.0537922	0.0698725	0.0754868	0.0984771		8.8	0.0236768	0.0382176	0.0550134	0.0579053	0.0589549	0.0682386			8.8	0.0130117	0.0207138	0.0462432	0.0779692	0.0903739	0.0854552		8.8	0.0246523	0.0345985	0.0509425	0.0577207	0.0668696	0.0671063			8.8	0.00025647	0.0175882	0.0364479	0.0607276	0.0569771	0.0536353		8.8	0.0134597	0.0334232	0.043031
				9	0.0162357	0.0316035	0.0556718	0.0708183	0.0776102	0.0998089		9	0.0239038	0.0383307	0.0554866	0.058459	0.058734	0.0669937			9	0.0120068	0.0207372	0.0472379	0.0790438	0.0904273	0.0870473		9	0.0251037	0.0347613	0.0513007	0.0570235	0.0667245	0.065633			9	-5.33E-02	0.0174428	0.0380603	0.0622784	0.0574818	0.0548357		9	0.0130738	0.0351276	0.0420447
				9.2	0.016253	0.031827	0.0567895	0.0716854	0.0787975	0.0999624		9.2	0.0233342	0.0388874	0.0566999	0.0582893	0.0589694	0.0669804			9.2	0.0123671	0.0211113	0.0478628	0.0797311	0.0898107	0.0872427		9.2	0.0245672	0.0344062	0.0526556	0.0556706	0.0661975	0.0646561			9.2	-0.00078993	0.0184427	0.0386226	0.0632896	0.058649	0.0543006		9.2	0.0134246	0.0339276	0.0423639
				9.4	0.0161401	0.032229	0.0574864	0.0725375	0.0813872	0.100701		9.4	0.0228765	0.0396115	0.0557971	0.0593379	0.0585105	0.0662196			9.4	0.012865	0.0209626	0.0484368	0.0798263	0.090678	0.0883982		9.4	0.0241881	0.0342208	0.0531225	0.0559033	0.0666769	0.0635182			9.4	0.00019815	0.0197511	0.0390479	0.0646048	0.0595458	0.0554996		9.4	0.014632	0.0347449	0.0414536
				9.6	0.0167833	0.0321156	0.0589614	0.0735845	0.0826723	0.101855		9.6	0.023134	0.0392894	0.0555416	0.0580281	0.0579121	0.0664083			9.6	0.0117057	0.0214734	0.0492999	0.0807492	0.0906468	0.0897727		9.6	0.0240493	0.0327165	0.0517567	0.0559228	0.0657722	0.0616086			9.6	0.00028513	0.0200628	0.0406446	0.066084	0.0612836	0.0551601		9.6	0.015002	0.0337296	0.0405903
				9.8	0.0166475	0.0320645	0.0593383	0.0746332	0.0849954	0.102287		9.8	0.0225207	0.0398854	0.0546967	0.0579627	0.0582724	0.0656121			9.8	0.012064	0.0225531	0.0498492	0.0803427	0.0910615	0.0900707		9.8	0.0233637	0.0327887	0.0514131	0.0555469	0.0649938	0.0602812			9.8	0.00182262	0.0202701	0.0416205	0.0671142	0.0628235	0.0552628		9.8	0.0160541	0.0325943	0.0407668
				10	0.0164732	0.0321172	0.0606881	0.0761628	0.0858702	0.102721		10	0.0231063	0.0401982	0.0546874	0.0572239	0.0582398	0.0657753			10	0.0122215	0.0244786	0.0485421	0.0805766	0.0917404	0.0897831		10	0.0230068	0.0322943	0.0519322	0.0552915	0.0644785	0.0594445			10	0.00213898	0.0213476	0.0426416	0.0682565	0.0641314	0.0553261		10	0.0158673	0.03214	0.0396727
				10.2	0.0159385	0.0334486	0.0619467	0.0784195	0.0855163	0.104088		10.2	0.022526	0.0399804	0.0528055	0.0579059	0.058331	0.0646382			10.2	0.0112431	0.0245549	0.0493971	0.0822992	0.0926118	0.0899451		10.2	0.023342	0.0329115	0.050527	0.0552629	0.0631734	0.0589352			10.2	0.00236381	0.0216269	0.0437932	0.0692835	0.0664966	0.0558547		10.2	0.0157095	0.0314486	0.0388344
				10.4	0.017469	0.0343191	0.0617101	0.0783516	0.0863695	0.104519		10.4	0.0217786	0.0394269	0.0511066	0.0564351	0.0575984	0.0638794			10.4	0.0117412	0.0248847	0.049154	0.0822341	0.0942802	0.0902763		10.4	0.0220154	0.0333414	0.0489425	0.0550034	0.0630215	0.0578242			10.4	0.00176487	0.0200079	0.0437677	0.0704209	0.0679522	0.0573266		10.4	0.0160642	0.0311338	0.0383046
				10.6	0.0172499	0.034033	0.0621776	0.0793245	0.0859164	0.105061		10.6	0.0211974	0.0397534	0.0499134	0.0560229	0.0576658	0.062989			10.6	0.0123543	0.0248936	0.0494622	0.0826783	0.0948483	0.0909143		10.6	0.0213183	0.0333119	0.0478844	0.0539551	0.061779	0.0575314			10.6	0.00151671	0.021147	0.0425898	0.0721509	0.0677778	0.0577817		10.6	0.0171569	0.0306995	0.0378738
				10.8	0.0179533	0.0334757	0.061736	0.079302	0.0856554	0.105791		10.8	0.020924	0.038228	0.0489838	0.0564436	0.0577787	0.0629436			10.8	0.0120173	0.0252879	0.0504452	0.0836731	0.0953495	0.0912812		10.8	0.021067	0.0338657	0.0474883	0.0529891	0.0617268	0.0567366			10.8	0.00114467	0.0214231	0.0423615	0.0736977	0.0691664	0.0584028		10.8	0.0168794	0.0294903	0.0379862
				11	0.0184732	0.0336445	0.0618358	0.07925	0.08547	0.106772		11	0.0191437	0.0377765	0.0481903	0.0558821	0.0571089	0.0627639			11	0.0119704	0.0259127	0.0514127	0.0845923	0.0964289	0.092104		11	0.0212602	0.0342692	0.0467185	0.052134	0.0609053	0.0564314			11	0.00107306	0.0212528	0.0424768	0.0750472	0.0693028	0.0600865		11	0.0168418	0.0295205	0.038262
				11.2	0.0190231	0.033713	0.0623962	0.0792457	0.0849301	0.107317		11.2	0.0189206	0.0364838	0.0468513	0.0554667	0.055843	0.062498			11.2	0.0117561	0.0269863	0.0520893	0.084907	0.0977294	0.0931734		11.2	0.020874	0.0339527	0.0452785	0.0513792	0.0603158	0.0559127			11.2	0.00172447	0.0209784	0.042821	0.0762825	0.0703441	0.0606288		11.2	0.0164346	0.0297159	0.0388875
				11.4	0.0188385	0.0348301	0.062809	0.0791273	0.0854531	0.108002		11.4	0.0180839	0.035639	0.0451209	0.0543904	0.0547941	0.0603554			11.4	0.0127188	0.0277329	0.052467	0.086555	0.0978327	0.0932438		11.4	0.0206593	0.0337699	0.0446846	0.0511156	0.0595597	0.0545322			11.4	0.00147655	0.0224208	0.0429476	0.0756664	0.0698816	0.0630533		11.4	0.0161172	0.0284269	0.0386469
				11.6	0.017464	0.0350582	0.0627355	0.0790592	0.0853633	0.108915		11.6	0.0181514	0.0343527	0.0444784	0.0536888	0.0539864	0.0600319			11.6	0.0135534	0.0281491	0.0534262	0.0882435	0.0986979	0.093817		11.6	0.0207782	0.0340898	0.0433912	0.0507211	0.0589783	0.0538846			11.6	0.0014751	0.0230189	0.044925	0.0753702	0.0716038	0.0632402		11.6	0.0160172	0.0279619	0.0392981
				11.8	0.0169503	0.0356489	0.0619279	0.0793157	0.0853857	0.109367		11.8	0.0177905	0.0329312	0.0440599	0.0535118	0.0535272	0.0595721			11.8	0.0138731	0.0279182	0.0539232	0.088875	0.0984901	0.0942556		11.8	0.0206087	0.0337532	0.0429627	0.0505067	0.0588648	0.0538634			11.8	0.00146024	0.0243372	0.0459427	0.0762999	0.0722654	0.0636186		11.8	0.0148614	0.0265646	0.0375519
				12	0.0167227	0.0354096	0.0618619	0.08007	0.0865437	0.10966		12	0.0177536	0.0316183	0.0443751	0.0525267	0.051515	0.0599738			12	0.0138957	0.0277143	0.0546628	0.0890108	0.0994718	0.0947806		12	0.0207362	0.0327369	0.041839	0.0488985	0.057345	0.0539821			12	0.00309712	0.025501	0.0467607	0.0760127	0.0727898	0.0646112		12	0.0132123	0.025593	0.0358589
				12.2	0.0172394	0.035672	0.062936	0.0809291	0.0867044	0.109815		12.2	0.0182077	0.0303988	0.0442828	0.0517842	0.0509336	0.0600911			12.2	0.0135088	0.0272329	0.0562248	0.0895082	0.099658	0.0953294		12.2	0.0205912	0.0319959	0.0410304	0.0487357	0.0575132	0.0543939			12.2	0.0034214	0.0258181	0.0471261	0.0761683	0.073821	0.0656778		12.2	0.0119993	0.0240714	0.0349267
				12.4	0.0167927	0.0355093	0.0630321	0.0829635	0.0875518	0.110588		12.4	0.0190642	0.030047	0.0443766	0.0515734	0.0497052	0.0600478			12.4	0.0143625	0.0265787	0.0567567	0.0900202	0.0998508	0.0953727		12.4	0.0216577	0.0313748	0.0403821	0.0470339	0.0574425	0.0547962			12.4	0.0035012	0.0258968	0.0485756	0.0764428	0.074369	0.0666801		12.4	0.0105714	0.0245754	0.0346696
				12.6	0.0168854	0.0357265	0.0641036	0.0835843	0.0881626	0.110959		12.6	0.0194493	0.0301181	0.0432703	0.0505212	0.0491249	0.0595066			12.6	0.0145298	0.0276547	0.0576023	0.0903577	0.100741	0.0958866		12.6	0.0217339	0.0300007	0.0405153	0.0468943	0.0570133	0.0534643			12.6	0.00330615	0.0247673	0.0489366	0.0769956	0.0743998	0.0672892		12.6	0.00997764	0.0251274	0.0345927
				12.8	0.0172291	0.0353353	0.0644044	0.0839496	0.0887281	0.111821		12.8	0.020771	0.0289334	0.0434693	0.0499365	0.0484721	0.0587038			12.8	0.0151593	0.0275699	0.0581793	0.0910338	0.100742	0.0973433		12.8	0.0221671	0.0294222	0.0408283	0.0460106	0.0567711	0.0526253			12.8	0.00350089	0.0251021	0.05028	0.0770537	0.0740425	0.0677018		12.8	0.00904374	0.0262426	0.0338228
				13	0.0170176	0.0361041	0.065311	0.0841003	0.089474	0.111978		13	0.0219481	0.0287569	0.0433089	0.0495052	0.0486745	0.0585178			13	0.0151506	0.0261999	0.0585424	0.0911906	0.100681	0.0994127		13	0.0215414	0.0287816	0.0407812	0.0454005	0.0560661	0.0523376			13	0.00298554	0.0255195	0.0515065	0.077128	0.0747511	0.0681205		13	0.00949234	0.0268307	0.032211
				13.2	0.0171286	0.0368365	0.0662852	0.0847283	0.0903139	0.111549		13.2	0.0221595	0.0297631	0.0426869	0.048433	0.0480462	0.0583889			13.2	0.0153172	0.0263453	0.0586613	0.0907934	0.100778	0.10069		13.2	0.0211937	0.0281789	0.0417083	0.0457416	0.0551582	0.0526435			13.2	0.00285432	0.0264183	0.0519961	0.0764638	0.075215	0.0680526		13.2	0.0105817	0.0258504	0.0313564
				13.4	0.0177687	0.0377662	0.0663313	0.0857918	0.0923336	0.112929		13.4	0.0225497	0.0300899	0.0423428	0.0475441	0.0481554	0.0572109			13.4	0.0152422	0.0259463	0.0589954	0.0906621	0.102859	0.100864		13.4	0.0210452	0.0277877	0.040959	0.046951	0.0553006	0.0515739			13.4	0.00350025	0.0266933	0.0520094	0.0767026	0.0758071	0.06832		13.4	0.0107137	0.0260714	0.0301578
				13.6	0.0177972	0.0382667	0.0660383	0.0861817	0.0928036	0.113929		13.6	0.0224823	0.0298546	0.0423636	0.0453088	0.0485661	0.057015			13.6	0.0152324	0.0259791	0.058228	0.090905	0.103913	0.101346		13.6	0.0208935	0.0273835	0.0394766	0.0471994	0.0548203	0.0520645			13.6	0.00312136	0.0269833	0.0523704	0.0774626	0.0776113	0.0683741		13.6	0.0119014	0.0255252	0.0298955
				13.8	0.0171509	0.0391731	0.0662469	0.0867867	0.0941606	0.114255		13.8	0.0228272	0.0311297	0.0423766	0.045068	0.0492865	0.0571767			13.8	0.0156137	0.0262502	0.0586147	0.0912134	0.104451	0.101864		13.8	0.0206741	0.0266987	0.0398384	0.0465977	0.054607	0.0521819			13.8	0.0032293	0.0270713	0.0531311	0.077284	0.0770716	0.0685526		13.8	0.0131628	0.0256218	0.0293162
				14	0.018157	0.0393415	0.0667039	0.0869275	0.0948029	0.114791		14	0.0231317	0.0315887	0.0428371	0.0440129	0.0493296	0.0573855			14	0.0155086	0.026625	0.0576145	0.0927903	0.105189	0.102247		14	0.021888	0.0254387	0.040968	0.0462615	0.0536361	0.0517297			14	0.0020108	0.0279417	0.0543055	0.0769591	0.0775848	0.0684223		14	0.0137309	0.024743	0.0276034
				14.2	0.0187118	0.039946	0.0674614	0.087172	0.0959322	0.115719		14.2	0.0218742	0.0318129	0.0419652	0.0437556	0.0492445	0.0569783			14.2	0.0157711	0.0264877	0.0580121	0.0932368	0.105914	0.103107		14.2	0.0217666	0.0263922	0.0404105	0.0465678	0.0529331	0.0523099			14.2	0.00081728	0.0281492	0.0544003	0.0776937	0.0780744	0.0681396		14.2	0.0134538	0.0239812	0.0276134
				14.4	0.0194581	0.0394218	0.0678558	0.0863143	0.0967821	0.116556		14.4	0.0226072	0.0315206	0.042328	0.042949	0.0484031	0.0569869			14.4	0.0163643	0.0270196	0.0577046	0.0942967	0.107188	0.103542		14.4	0.022153	0.0274959	0.0404674	0.0466608	0.0521128	0.0523791			14.4	7.81E-02	0.0289113	0.0542556	0.0788298	0.0786608	0.0686479		14.4	0.0141586	0.0231631	0.0279769
				14.6	0.0185179	0.0394125	0.069268	0.0869455	0.0979085	0.116458		14.6	0.0231322	0.0326303	0.0425337	0.04271	0.0475449	0.0561751			14.6	0.0161739	0.0271024	0.0584763	0.0946642	0.10848	0.10374		14.6	0.0228937	0.0274073	0.0418582	0.0458435	0.0517256	0.0518357			14.6	0.0003404	0.0302827	0.0546828	0.0796878	0.0774032	0.0693049		14.6	0.0145012	0.0223229	0.0291288
				14.8	0.0192915	0.0396893	0.0690624	0.087891	0.0985492	0.117287		14.8	0.0227555	0.0327353	0.0425532	0.0424818	0.0479706	0.0558647			14.8	0.0160175	0.0275678	0.0598207	0.0960709	0.10864	0.104019		14.8	0.0230644	0.0280137	0.0424265	0.0448298	0.0521077	0.0515655			14.8	-8.83E-02	0.0304682	0.0540919	0.0811775	0.0783282	0.0690217		14.8	0.0142139	0.0218623	0.0288654
				15	0.019929	0.0409872	0.0695734	0.088373	0.0991712	0.1174		15	0.021734	0.0336861	0.0425719	0.0418502	0.0466534	0.0558904			15	0.0169189	0.0281696	0.0598198	0.0967661	0.11005	0.10429		15	0.0230177	0.028365	0.0418188	0.0445394	0.0518541	0.0514857			15	-0.00011461	0.0307154	0.0533301	0.0815846	0.0779834	0.0697888		15	0.0141655	0.0222786	0.0302648
				15.2	0.0199384	0.0415116	0.070149	0.0895973	0.100168	0.117393		15.2	0.0212937	0.0328674	0.0422057	0.0425763	0.0457704	0.0555511			15.2	0.0168762	0.0288199	0.0595294	0.0965588	0.110789	0.104183		15.2	0.02299	0.0283404	0.0414769	0.0439012	0.0518866	0.0509047			15.2	0.00074699	0.030499	0.0524112	0.0815516	0.07796	0.0688432		15.2	0.0138927	0.0216201	0.0299915
				15.4	0.0200325	0.042424	0.0700866	0.0895487	0.101643	0.117693		15.4	0.0200931	0.0339537	0.0416372	0.0422769	0.0453497	0.054007			15.4	0.0165592	0.0296503	0.0605996	0.0977096	0.111676	0.104864		15.4	0.0223258	0.0284967	0.0410536	0.0427345	0.0515779	0.0503961			15.4	0.00068102	0.0306559	0.0518668	0.0818121	0.077862	0.0710815		15.4	0.0138448	0.0194164	0.0304721
				15.6	0.0199506	0.0417555	0.0712241	0.0905543	0.101047	0.117585		15.6	0.0190885	0.0349804	0.0414575	0.0431401	0.044729	0.054248			15.6	0.0167028	0.0303247	0.0609782	0.0979186	0.112428	0.104726		15.6	0.0226814	0.0282257	0.0400037	0.041882	0.0508758	0.0508872			15.6	0.00154211	0.0303808	0.0518502	0.0834383	0.079391	0.0699256		15.6	0.0128915	0.0182167	0.0306502
				15.8	0.0205377	0.0419923	0.0708491	0.09239	0.10095	0.117215		15.8	0.0188236	0.0340227	0.0415384	0.0438632	0.0446849	0.0540478			15.8	0.0160567	0.029521	0.0612758	0.0982833	0.112634	0.104446		15.8	0.0220392	0.0275043	0.0394555	0.0412109	0.050179	0.0510449			15.8	0.00237304	0.0303154	0.0516949	0.0840926	0.080215	0.0710909		15.8	0.0107949	0.0180358	0.0299984
				16	0.0198736	0.041474	0.0722731	0.0933716	0.100788	0.118033		16	0.018569	0.033415	0.0413977	0.0436713	0.0427647	0.0534199			16	0.0150219	0.0297656	0.0622887	0.0983495	0.113958	0.105132		16	0.0208845	0.0268726	0.0381124	0.0396578	0.0496611	0.0507262			16	0.00436933	0.0300831	0.051467	0.0849751	0.0807472	0.0710127		16	0.00912294	0.0183973	0.0297096
				16.2	0.0198145	0.0421179	0.0729052	0.094123	0.100709	0.11788		16.2	0.0188542	0.0335351	0.0412561	0.044806	0.0422805	0.0531613			16.2	0.0146512	0.0299695	0.0637256	0.0981441	0.114364	0.106758		16.2	0.0200433	0.0271985	0.0379726	0.0395739	0.0498652	0.0508419			16.2	0.00390399	0.0295454	0.0511588	0.0854859	0.0811387	0.0726919		16.2	0.00901109	0.0183434	0.0301097
				16.4	0.018971	0.0412264	0.0727156	0.0946277	0.100842	0.118155		16.4	0.0188266	0.0335336	0.0413427	0.0455573	0.0410185	0.0526126			16.4	0.0151717	0.0302605	0.0641254	0.0989905	0.113846	0.10719		16.4	0.019643	0.0276404	0.0367997	0.0386597	0.049245	0.0509135			16.4	0.00478647	0.0295813	0.0507751	0.0860616	0.0828003	0.0739071		16.4	0.00960794	0.0192509	0.0301901
				16.6	0.0200342	0.0416073	0.0739872	0.0942444	0.100212	0.118646		16.6	0.0189949	0.033138	0.0405606	0.0453996	0.0409239	0.0523209			16.6	0.0157881	0.0319336	0.0649142	0.0986251	0.113608	0.107622		16.6	0.0190987	0.0271175	0.0366673	0.038367	0.0475923	0.0498492			16.6	0.0048299	0.0300641	0.0506967	0.0860888	0.0837395	0.0753967		16.6	0.0101478	0.0196988	0.0308845
				16.8	0.0201073	0.0414618	0.0740889	0.0942077	0.0992702	0.119898		16.8	0.0188095	0.0318528	0.0409117	0.0456997	0.040877	0.0518915			16.8	0.0151846	0.0322801	0.0657194	0.0993512	0.112657	0.109977		16.8	0.0189202	0.0273289	0.03656	0.0377447	0.0470644	0.0498053			16.8	0.00504274	0.0301937	0.0509143	0.0866939	0.0836294	0.0762712		16.8	0.0101019	0.0204672	0.0300677
				17	0.0200549	0.0420411	0.0751021	0.0948086	0.0993646	0.120389		17	0.0184174	0.0312551	0.0406023	0.0445433	0.040573	0.0513412			17	0.0153471	0.0336167	0.0662604	0.0996094	0.112199	0.110285		17	0.017711	0.0265359	0.0359298	0.0372045	0.047226	0.0505236			17	0.0045335	0.031036	0.0516505	0.0872756	0.0836662	0.0774183		17	0.0111657	0.0199201	0.0291369
				17.2	0.0198862	0.0424112	0.0762229	0.0951098	0.0998337	0.12114		17.2	0.0176874	0.0311204	0.0408291	0.0437068	0.0403317	0.0504248			17.2	0.0147042	0.0343795	0.0671874	0.0983991	0.112457	0.110689		17.2	0.017416	0.0272533	0.035247	0.0379662	0.0471237	0.0502215			17.2	0.00516343	0.0323159	0.0511398	0.0874633	0.0843985	0.0783025		17.2	0.0118304	0.0194974	0.0282827
				17.4	0.0189307	0.043533	0.0753039	0.0953463	0.100263	0.121457		17.4	0.0179427	0.0294346	0.0403425	0.0431371	0.0410793	0.0495777			17.4	0.0151001	0.0341391	0.0676246	0.0985257	0.112461	0.11093		17.4	0.0171266	0.0271814	0.0339772	0.0379086	0.0474413	0.0496871			17.4	0.00464912	0.0321587	0.0519863	0.0877383	0.0852267	0.0784154		17.4	0.013041	0.0192963	0.0283036
				17.6	0.0173544	0.0421795	0.0754523	0.0949401	0.0999399	0.121217		17.6	0.0188548	0.0286614	0.0394781	0.0425845	0.0407607	0.0499882			17.6	0.0147754	0.0343856	0.0688456	0.0988187	0.111823	0.111164		17.6	0.0181637	0.027301	0.0329423	0.0377343	0.0471166	0.051028			17.6	0.00395811	0.032465	0.0533966	0.0880064	0.0864641	0.0790518		17.6	0.0133567	0.0201785	0.0281987
				17.8	0.0161248	0.0414312	0.076685	0.0950662	0.0998635	0.121254		17.8	0.0192809	0.0280408	0.0383557	0.0417209	0.0412797	0.0511644			17.8	0.0150614	0.0347205	0.0696966	0.100111	0.111244	0.111884		17.8	0.0186639	0.0258281	0.0322346	0.038156	0.0463177	0.0508761			17.8	0.00303611	0.0335197	0.0559989	0.0888067	0.0861522	0.0789258		17.8	0.0128883	0.0196928	0.0258135
				18	0.0171809	0.0415871	0.0770389	0.0944537	0.100169	0.121235		18	0.018586	0.0271807	0.0378921	0.040221	0.0417939	0.0506034			18	0.0153651	0.0353992	0.0693719	0.100535	0.111069	0.112156		18	0.01933	0.025044	0.0326652	0.0383375	0.0450633	0.0504451			18	0.00259304	0.0336302	0.0559381	0.089744	0.0886017	0.0785077		18	0.0128479	0.0197854	0.0259713
				18.2	0.0171744	0.0412737	0.0775611	0.0948904	0.100272	0.121283		18.2	0.0182591	0.0257284	0.0373349	0.0390339	0.0416733	0.0503509			18.2	0.0158956	0.0354671	0.0703826	0.100051	0.11124	0.111624		18.2	0.0193221	0.0248529	0.0318701	0.0393072	0.0455904	0.050416			18.2	0.00277817	0.0329731	0.0570007	0.0911128	0.0886675	0.0780428		18.2	0.0125897	0.0202147	0.0262881
				18.4	0.0166751	0.040985	0.0773461	0.0953207	0.101411	0.121556		18.4	0.0186981	0.0247931	0.0363618	0.0374418	0.0414621	0.0501457			18.4	0.0155251	0.0360413	0.070465	0.101067	0.112913	0.11153		18.4	0.0195815	0.0247675	0.031836	0.0396824	0.0453711	0.0493761			18.4	0.00244623	0.0329303	0.0579362	0.0916115	0.0891603	0.0782079		18.4	0.0117422	0.0193043	0.0256274
				18.6	0.016386	0.0417727	0.0774355	0.0955673	0.103436	0.121169		18.6	0.0190156	0.0253963	0.0356014	0.0363776	0.0408082	0.0498327			18.6	0.0157832	0.0352591	0.0693396	0.100969	0.113979	0.110659		18.6	0.0193325	0.0246996	0.031893	0.0395485	0.0459508	0.0475164			18.6	0.00281344	0.0325443	0.0586956	0.0924057	0.0887989	0.078685		18.6	0.0108857	0.0197128	0.0256625
				18.8	0.017104	0.0421392	0.0770943	0.0960559	0.102935	0.121778		18.8	0.018529	0.0249105	0.0352366	0.0371228	0.0403205	0.0507098			18.8	0.0163887	0.0353956	0.0695128	0.101725	0.113764	0.110026		18.8	0.0188019	0.0241823	0.0313871	0.0386779	0.0462134	0.0463286			18.8	0.00244818	0.0322915	0.0583617	0.0930408	0.0896065	0.0780673		18.8	0.0108245	0.0197089	0.0247002
				19	0.01784	0.0431231	0.0778177	0.096267	0.104554	0.121422		19	0.016827	0.0255466	0.0346342	0.0372473	0.0391251	0.0506716			19	0.0163292	0.0347227	0.0697135	0.102224	0.114981	0.109868		19	0.0180808	0.0245466	0.0315863	0.0390705	0.0453538	0.0454946			19	0.00274213	0.0323592	0.0594608	0.0928775	0.0893654	0.0778341		19	0.00993424	0.0206754	0.0247427
				19.2	0.0188275	0.0427999	0.0779206	0.0972259	0.10533	0.121727		19.2	0.0163225	0.0253798	0.0339303	0.0378982	0.0386811	0.050904			19.2	0.016013	0.0353102	0.0693781	0.103478	0.115024	0.109848		19.2	0.0181549	0.0242468	0.0312262	0.0387687	0.0449524	0.0440975			19.2	0.003125	0.0330073	0.0599334	0.093859	0.0891368	0.0781485		19.2	0.00906592	0.019225	0.024209
				19.4	0.0195194	0.0429915	0.0788174	0.0981548	0.105948	0.121962		19.4	0.0161014	0.0258952	0.033067	0.0378789	0.0384097	0.0504552			19.4	0.0158189	0.0360465	0.0695153	0.103518	0.115646	0.109398		19.4	0.0181676	0.0239647	0.0311926	0.0381184	0.0443989	0.0432086			19.4	0.00305597	0.0319708	0.0610485	0.0954862	0.0891531	0.0789896		19.4	0.00704272	0.0196269	0.0245532
				19.6	0.0202944	0.0426221	0.0790775	0.0991911	0.105845	0.122258		19.6	0.0155219	0.025305	0.0328263	0.0386562	0.038188	0.049846			19.6	0.016425	0.0356315	0.0696132	0.103871	0.115465	0.109959		19.6	0.0186478	0.0231587	0.0320059	0.0379723	0.0447288	0.0427794			19.6	0.00436804	0.0318557	0.0613876	0.0963233	0.0894363	0.0778897		19.6	0.00524854	0.0201333	0.024047
				19.8	0.0212844	0.042814	0.0786786	0.0994885	0.105835	0.122324		19.8	0.0152622	0.0243437	0.0333397	0.0383898	0.037664	0.0488939			19.8	0.0160928	0.0341341	0.0702137	0.104642	0.115439	0.110027		19.8	0.0180263	0.0227081	0.0329023	0.037134	0.0450058	0.0423308			19.8	0.00556468	0.0311464	0.06198	0.096548	0.0888866	0.0793382		19.8	0.00500213	0.0220045	0.023553
				20	0.0215381	0.0423991	0.0789058	0.0993312	0.1055	0.122375		20	0.0150171	0.0249664	0.0342246	0.0382002	0.0358361	0.0489207			20	0.0164324	0.0340907	0.0706588	0.103929	0.116967	0.110292		20	0.0175979	0.0224089	0.0331507	0.036233	0.044775	0.0415401			20	0.00604164	0.0313233	0.0614535	0.0959803	0.0882265	0.0795899		20	0.0052077	0.0217532	0.0242669
				20.2	0.0221037	0.0429664	0.0793141	0.0991587	0.105513	0.122264		20.2	0.0153695	0.025236	0.0345356	0.0383569	0.0361523	0.0487779			20.2	0.0167856	0.0341303	0.070906	0.104394	0.116553	0.111434		20.2	0.017309	0.022875	0.0333081	0.0358883	0.0445927	0.0418713			20.2	0.00577135	0.0316125	0.0616091	0.0951724	0.0877237	0.0799945		20.2	0.0063111	0.0218621	0.0241243
				20.4	0.0229486	0.0432358	0.0791586	0.0990389	0.105395	0.122912		20.4	0.0151672	0.0248137	0.0346078	0.0381923	0.0362416	0.0489885			20.4	0.0175662	0.0340191	0.0711716	0.105373	0.116858	0.110681		20.4	0.0170745	0.0227756	0.0327453	0.0351498	0.0449954	0.0421273			20.4	0.00594851	0.0319721	0.0605586	0.0946398	0.0883271	0.0813135		20.4	0.00623817	0.0222343	0.0246213
				20.6	0.0239584	0.0444921	0.0793239	0.0988896	0.104826	0.122947		20.6	0.0152289	0.025101	0.034108	0.0381506	0.0364225	0.0479487			20.6	0.0175579	0.0341477	0.0715043	0.105181	0.11757	0.110506		20.6	0.0170065	0.0220234	0.0326123	0.0339427	0.0451372	0.0424165			20.6	0.00560904	0.0324094	0.0609034	0.0944331	0.0871457	0.0830556		20.6	0.00703145	0.0213036	0.0237684
				20.8	0.0234019	0.0447904	0.0785768	0.0983127	0.103997	0.123891		20.8	0.0149926	0.0252544	0.0345359	0.0379523	0.0363552	0.0468778			20.8	0.017218	0.0346482	0.0717593	0.105006	0.118165	0.112061		20.8	0.0170978	0.0221517	0.032151	0.0327773	0.044826	0.0432574			20.8	0.00451726	0.032625	0.0599607	0.0948545	0.0862711	0.0835771		20.8	0.0077394	0.0217013	0.0235635
				21	0.023476	0.0455123	0.0793042	0.0989445	0.104667	0.124572		21	0.0148989	0.0247335	0.0353401	0.0371327	0.0359002	0.0469775			21	0.0175391	0.0356104	0.0717407	0.104588	0.118151	0.111937		21	0.0169012	0.0223038	0.0315882	0.0314321	0.0444688	0.0431322			21	0.00381839	0.0342293	0.0608399	0.0942567	0.0863303	0.084413		21	0.00825043	0.0212406	0.0234176
				21.2	0.0228271	0.0457219	0.0790154	0.0991972	0.105079	0.124762		21.2	0.0156213	0.0245394	0.0349683	0.0374545	0.0362005	0.0470746			21.2	0.0177119	0.0347114	0.0711175	0.103656	0.118689	0.11222		21.2	0.0174254	0.0228542	0.0314054	0.0319771	0.0439215	0.0432669			21.2	0.00368351	0.0336653	0.0597936	0.0934278	0.087041	0.0844667		21.2	0.00951503	0.0213899	0.0235974
				21.4	0.0222025	0.04611	0.0788939	0.0986752	0.105234	0.1245		21.4	0.0159907	0.0234507	0.033358	0.0372984	0.0364219	0.0466547			21.4	0.0181242	0.0345314	0.0716441	0.10433	0.118556	0.113448		21.4	0.0179789	0.0228107	0.0307308	0.0315626	0.0436253	0.0435257			21.4	0.00315722	0.033573	0.0609582	0.092378	0.0878344	0.0840213		21.4	0.0102596	0.0214124	0.0241645
				21.6	0.0217433	0.045507	0.0787034	0.0976922	0.1053	0.124727		21.6	0.0168062	0.0232085	0.0336691	0.0362808	0.0370064	0.0464446			21.6	0.0177867	0.0348449	0.0727291	0.104614	0.119492	0.113052		21.6	0.0190741	0.0225905	0.0301129	0.0312783	0.0424813	0.0445201			21.6	0.00330945	0.0334504	0.0590335	0.0928101	0.0884989	0.0834545		21.6	0.00966675	0.0209994	0.0239044
				21.8	0.0217607	0.0459536	0.078234	0.0973991	0.105728	0.125531		21.8	0.0167597	0.0228046	0.0330167	0.0352995	0.038633	0.0465207			21.8	0.0190331	0.034761	0.0731056	0.104789	0.119798	0.114287		21.8	0.0180557	0.0216777	0.0290857	0.0311556	0.041879	0.0436641			21.8	0.00367842	0.0326409	0.0594273	0.0935436	0.0884265	0.0836873		21.8	0.0096995	0.0199245	0.0231274
				22	0.0226568	0.046094	0.0776904	0.0970506	0.106174	0.125877		22	0.0170801	0.0224873	0.033469	0.0346947	0.0391876	0.0458102			22	0.0190466	0.0359664	0.0727134	0.104099	0.12043	0.115332		22	0.018613	0.020312	0.0293758	0.0313086	0.0415218	0.0433416			22	0.00554437	0.0313463	0.058742	0.0945657	0.0892699	0.0834884		22	0.0105431	0.0199132	0.0238819
				22.2	0.0224568	0.045071	0.078001	0.0975087	0.106606	0.126285		22.2	0.0181352	0.0214019	0.0338253	0.0335747	0.0386222	0.0455318			22.2	0.0190246	0.0369322	0.0736406	0.104356	0.122446	0.115323		22.2	0.0186106	0.0198409	0.028599	0.0319622	0.0414207	0.0428392			22.2	0.00654502	0.031108	0.0591389	0.0949223	0.0889887	0.0831497		22.2	0.0104773	0.0198113	0.0242072
				22.4	0.0225362	0.044741	0.0782102	0.0973534	0.107877	0.126979		22.4	0.018911	0.0218121	0.0333936	0.0324776	0.0387526	0.0446529			22.4	0.0191505	0.0382795	0.0718744	0.104421	0.12352	0.115301		22.4	0.0171337	0.0201607	0.0289439	0.0325582	0.0404337	0.0422807			22.4	0.00710049	0.0316026	0.0594638	0.0946516	0.0888723	0.0821832		22.4	0.00940543	0.01776	0.0229095
				22.6	0.0228455	0.0446915	0.0787657	0.0969099	0.108329	0.127765		22.6	0.0196219	0.0226541	0.0329725	0.032767	0.0381879	0.0447512			22.6	0.0198252	0.0375176	0.0709718	0.105278	0.123652	0.115432		22.6	0.016863	0.0205673	0.0284511	0.0332716	0.040032	0.0413803			22.6	0.0091093	0.0324293	0.0594109	0.0954176	0.0893993	0.0810817		22.6	0.00907281	0.0182426	0.0228165
				22.8	0.0223998	0.0442403	0.0797159	0.0972982	0.108108	0.129358		22.8	0.019588	0.0239111	0.0321924	0.0331676	0.0383272	0.044657			22.8	0.0197109	0.0378675	0.0723402	0.105851	0.122993	0.115827		22.8	0.0165514	0.0207932	0.0282162	0.0335131	0.0394625	0.041007			22.8	0.00893077	0.0326698	0.0599478	0.0961637	0.0902342	0.0801641		22.8	0.00837301	0.0167758	0.0220758
				23	0.0232906	0.044755	0.080263	0.0983889	0.109571	0.129998		23	0.0192056	0.0248741	0.0317602	0.0328536	0.0379379	0.0440848			23	0.0201594	0.0386505	0.0728349	0.106021	0.123314	0.116619		23	0.0163941	0.0211128	0.0288722	0.034551	0.0392527	0.0411241			23	0.0108562	0.0337805	0.0604948	0.0969399	0.0904318	0.0807336		23	0.00761815	0.0170338	0.0218475
				23.2	0.0236202	0.0447627	0.0799648	0.0996328	0.1101	0.131077		23.2	0.0190119	0.0250453	0.0313853	0.0326905	0.0374895	0.0448599			23.2	0.0211852	0.0406688	0.0731586	0.106712	0.123165	0.116132		23.2	0.017602	0.0200418	0.029427	0.0353996	0.039188	0.0410153			23.2	0.0110801	0.0338246	0.0605417	0.0975927	0.091668	0.0809179		23.2	0.00706115	0.0162001	0.0210711
				23.4	0.0235531	0.04462	0.0806074	0.101198	0.110599	0.131743		23.4	0.0184884	0.025312	0.031739	0.0325618	0.0380063	0.0445152			23.4	0.0214041	0.0415166	0.0738942	0.106617	0.122016	0.115871		23.4	0.0175053	0.0196902	0.0303325	0.0356095	0.0390838	0.0410817			23.4	0.0128551	0.0336101	0.0605625	0.0982376	0.0928629	0.0799807		23.4	0.00686593	0.017237	0.0214358
				23.6	0.0232532	0.0443416	0.0813375	0.102124	0.110196	0.132048		23.6	0.0172095	0.0251106	0.0321314	0.0323607	0.0378011	0.0434074			23.6	0.0221463	0.0417874	0.0751823	0.107573	0.121247	0.116851		23.6	0.0173548	0.0185735	0.0319201	0.0356767	0.039829	0.0407903			23.6	0.0148056	0.0333552	0.0596389	0.0980242	0.0933555	0.0797875		23.6	0.00699599	0.0170343	0.0205322
				23.8	0.0231932	0.0442007	0.0823628	0.102891	0.10977	0.131445		23.8	0.0167986	0.0253825	0.0328506	0.0322758	0.0368778	0.0427432			23.8	0.0226874	0.0416504	0.0755959	0.10842	0.121369	0.11679		23.8	0.0162852	0.0188263	0.0326993	0.0352385	0.0392461	0.0403104			23.8	0.0148099	0.0334392	0.0594265	0.0989688	0.0926657	0.0794877		23.8	0.0080218	0.0184356	0.0196402
				24	0.0225809	0.0441958	0.0820816	0.10256	0.109846	0.131694		24	0.01607	0.0256868	0.0321682	0.0320521	0.0367002	0.0435613			24	0.0238323	0.0421675	0.076424	0.10823	0.121321	0.116764		24	0.0154131	0.0193741	0.0331315	0.0345666	0.0398413	0.0403981			24	0.01474	0.0342408	0.059113	0.0988837	0.0941987	0.0783753		24	0.00729741	0.0172981	0.0203348
				24.2	0.0220883	0.0450883	0.0832242	0.102926	0.109561	0.132147		24.2	0.0160354	0.0247147	0.0321584	0.0319932	0.0368633	0.0428722			24.2	0.024369	0.0426617	0.0764551	0.109404	0.120839	0.116237		24.2	0.014857	0.0194535	0.0322616	0.0335131	0.0411995	0.040479			24.2	0.0146019	0.034414	0.0593837	0.0992296	0.0950446	0.0783381		24.2	0.00630154	0.0175989	0.0188854
				24.4	0.0219287	0.0458469	0.0821142	0.102988	0.109865	0.131763		24.4	0.0148509	0.0250245	0.0319398	0.0323487	0.0366651	0.0428515			24.4	0.0240086	0.0430161	0.0763811	0.110164	0.121187	0.115411		24.4	0.0149339	0.0191595	0.0326887	0.0325303	0.0414967	0.0411097			24.4	0.0138362	0.0341989	0.0593504	0.0987728	0.0960303	0.0798774		24.4	0.00547072	0.0171024	0.018547
				24.6	0.021412	0.04644	0.0827979	0.103884	0.109529	0.131256		24.6	0.0141806	0.0251639	0.0320505	0.0331846	0.0362543	0.0415453			24.6	0.023269	0.044034	0.0747092	0.109945	0.121468	0.115729		24.6	0.0159452	0.0193385	0.0326441	0.0314807	0.0413667	0.0418292			24.6	0.0130451	0.0333252	0.0588942	0.0985553	0.0963982	0.0807617		24.6	0.0056689	0.0177984	0.0180807
				24.8	0.0211972	0.046167	0.0832806	0.103951	0.108923	0.130645		24.8	0.0133329	0.0247792	0.0325726	0.0330257	0.0351099	0.0411967			24.8	0.0233716	0.0440077	0.074617	0.110286	0.122352	0.116001		24.8	0.0168134	0.0200429	0.0330513	0.0300609	0.039811	0.0423504			24.8	0.0111134	0.0329828	0.0593736	0.0975456	0.096015	0.0811422		24.8	0.00584284	0.0186813	0.0181708
				25	0.0215431	0.0468493	0.0838749	0.104486	0.108707	0.129996		25	0.0134612	0.0242501	0.0332153	0.0332089	0.0343133	0.0416206			25	0.0233518	0.0436056	0.0740439	0.111325	0.121943	0.11594		25	0.0164501	0.0202231	0.0336318	0.0291283	0.040051	0.0423101			25	0.00985074	0.0327722	0.0598248	0.0973576	0.0960602	0.0812599		25	0.00467231	0.0187032	0.0180326
				25.2	0.0219151	0.0471749	0.083218	0.104833	0.10775	0.129672		25.2	0.0131699	0.0237034	0.0324222	0.0330072	0.0344433	0.0412327			25.2	0.0229695	0.0429754	0.0734393	0.111014	0.122546	0.115927		25.2	0.0167187	0.0206332	0.0337577	0.0291959	0.0401502	0.0429997			25.2	0.00896735	0.0328455	0.059924	0.0964148	0.0969289	0.0818658		25.2	0.00392302	0.0193178	0.0179725
				25.4	0.0222201	0.0490584	0.0830476	0.104325	0.10774	0.128808		25.4	0.0127621	0.0228065	0.032124	0.0331426	0.0342017	0.0411004			25.4	0.0226274	0.0423277	0.074354	0.111313	0.122646	0.116767		25.4	0.0177085	0.0209048	0.0341661	0.0287165	0.0396797	0.0427627			25.4	0.00982977	0.0325533	0.0614752	0.0956776	0.0962305	0.0818545		25.4	0.00342314	0.0191734	0.0177815
				25.6	0.0227114	0.0494305	0.0817349	0.104439	0.107739	0.128487		25.6	0.0135313	0.0231677	0.0326796	0.0328374	0.0350799	0.0408898			25.6	0.0222539	0.042997	0.0740398	0.111868	0.123141	0.116761		25.6	0.0185471	0.0210904	0.0338384	0.0278876	0.0396107	0.0436246			25.6	0.009485	0.0329093	0.0616172	0.0957981	0.0948639	0.083023		25.6	0.0041346	0.0184028	0.0172902
				25.8	0.0229237	0.0493653	0.0821283	0.104769	0.107281	0.12857		25.8	0.014051	0.0236092	0.0324309	0.0330518	0.035493	0.0402851			25.8	0.0220419	0.0425794	0.0742329	0.112012	0.123825	0.116996		25.8	0.0178328	0.0223206	0.0326166	0.0272692	0.0400349	0.042569			25.8	0.00945034	0.033123	0.063783	0.0967302	0.0936933	0.0840335		25.8	0.00418274	0.0183423	0.0172216
				26	0.0237133	0.0495986	0.0822613	0.105179	0.107212	0.128088		26	0.0149212	0.0232575	0.0322775	0.0316636	0.0348867	0.0398191			26	0.0221781	0.0440183	0.0740449	0.111916	0.125079	0.116707		26	0.0178634	0.0224328	0.0323218	0.0269152	0.0400621	0.0430661			26	0.010845	0.033362	0.0644081	0.0981888	0.0931866	0.0844982		26	0.003959	0.0187411	0.01741
				26.2	0.024473	0.0494712	0.0823348	0.104473	0.106617	0.127879		26.2	0.0149932	0.0231116	0.0319548	0.0315483	0.0343749	0.0407573			26.2	0.0206224	0.0440104	0.0749565	0.111388	0.126335	0.116189		26.2	0.0174214	0.0226887	0.0312715	0.0268119	0.038702	0.0430043			26.2	0.0113194	0.0338432	0.0645373	0.0982385	0.0926066	0.0849866		26.2	0.00432166	0.0178538	0.017596
				26.4	0.0251217	0.049143	0.0819502	0.104676	0.106474	0.127236		26.4	0.015936	0.0239268	0.0317089	0.0301566	0.0342145	0.0408389			26.4	0.0194441	0.043416	0.0742014	0.111399	0.126588	0.115653		26.4	0.0166292	0.0227025	0.0305486	0.0272382	0.0377836	0.0431758			26.4	0.011039	0.0340996	0.0644312	0.0987112	0.0915448	0.0841049		26.4	0.00419308	0.0163183	0.0166123
				26.6	0.0251198	0.0497179	0.081855	0.104489	0.107843	0.127848		26.6	0.0164667	0.0241708	0.0315413	0.0310134	0.0339256	0.0411045			26.6	0.0190039	0.0424463	0.0751113	0.111878	0.126693	0.11646		26.6	0.0176313	0.0232601	0.0285733	0.0271551	0.0365534	0.0430464			26.6	0.0125657	0.0343126	0.0645927	0.0991336	0.0916213	0.0844959		26.6	0.00402077	0.0160571	0.0170672
				26.8	0.0249393	0.0509023	0.0820777	0.104199	0.107962	0.127946		26.8	0.0172154	0.0243711	0.0312356	0.0309553	0.0336622	0.0412924			26.8	0.0183181	0.0429732	0.0764441	0.111544	0.1273	0.116453		26.8	0.0179915	0.0238187	0.0276135	0.0274069	0.0366688	0.0416771			26.8	0.0116007	0.0348133	0.0645303	0.0996968	0.0917807	0.0849599		26.8	0.00424577	0.0164222	0.0172355
				27	0.0254058	0.0512408	0.081546	0.104363	0.108495	0.127915		27	0.0173546	0.0244595	0.0312983	0.0307641	0.033126	0.0408422			27	0.0191524	0.0432908	0.0769658	0.111623	0.127624	0.116459		27	0.0185825	0.0232424	0.0272157	0.0293655	0.0366937	0.0415983			27	0.0127623	0.0353272	0.0644589	0.099409	0.0922722	0.0845047		27	0.00541214	0.017336	0.01693
				27.2	0.0253194	0.0519289	0.0812496	0.105211	0.109483	0.1283		27.2	0.0171021	0.0249597	0.0310681	0.0303239	0.0322044	0.0410932			27.2	0.0189987	0.043082	0.0775909	0.112724	0.127041	0.11633		27.2	0.0184392	0.0233292	0.0269071	0.0303778	0.0361615	0.0406486			27.2	0.012635	0.0356962	0.0649212	0.0994894	0.0929956	0.0839399		27.2	0.00583805	0.0180521	0.0168615
				27.4	0.0252029	0.0520074	0.0810493	0.105054	0.109983	0.128983		27.4	0.0165354	0.0247877	0.0308263	0.0305431	0.0323264	0.0406038			27.4	0.0180562	0.042505	0.0782302	0.113108	0.1266	0.115863		27.4	0.0182097	0.0246553	0.0260577	0.030719	0.0360214	0.0393209			27.4	0.0136226	0.0356027	0.064551	0.0993959	0.0936266	0.0831089		27.4	0.00614104	0.0189152	0.0177618
				27.6	0.02527	0.0518018	0.081497	0.10537	0.110385	0.129768		27.6	0.0163504	0.0244846	0.031117	0.0303272	0.0318491	0.0403506			27.6	0.018801	0.0433372	0.0784514	0.113476	0.126748	0.116167		27.6	0.0175797	0.025304	0.0268467	0.0306682	0.0358291	0.0380345			27.6	0.013979	0.0349512	0.0636348	0.0988655	0.0933766	0.0833176		27.6	0.00647139	0.0180338	0.0171267
				27.8	0.025793	0.0514778	0.0814804	0.10593	0.111193	0.13088		27.8	0.0168305	0.0237088	0.0309324	0.0301891	0.0312517	0.0399328			27.8	0.0192787	0.0428221	0.0779404	0.114162	0.127299	0.116065		27.8	0.0164346	0.0261862	0.0260196	0.0298529	0.0354734	0.0370026			27.8	0.0131556	0.0356563	0.063642	0.0997018	0.0931079	0.0826099		27.8	0.00715979	0.0189807	0.0175562
				28	0.025174	0.0516075	0.0815407	0.105878	0.111974	0.131677		28	0.0160265	0.0234173	0.0301998	0.0302607	0.0318086	0.039605			28	0.0199602	0.0426901	0.07897	0.114305	0.127383	0.116014		28	0.0164642	0.0256551	0.0255021	0.0292508	0.0360202	0.0361487			28	0.0129746	0.0361728	0.0638068	0.0995771	0.0944642	0.0818345		28	0.00689344	0.0171119	0.0181782
				28.2	0.0257902	0.0515446	0.0826174	0.106028	0.11235	0.131646		28.2	0.0159441	0.0234274	0.0302659	0.0301411	0.0315328	0.0388608			28.2	0.0199977	0.0421694	0.0780468	0.114357	0.128084	0.115662		28.2	0.0168909	0.0255286	0.025237	0.0293015	0.0369893	0.0352774			28.2	0.0120564	0.0370064	0.0630379	0.0999434	0.0949599	0.0824481		28.2	0.00607769	0.0177618	0.0178943
				28.4	0.0260386	0.0506978	0.0832214	0.106721	0.113226	0.131656		28.4	0.0147631	0.0234506	0.0291671	0.030292	0.0324936	0.0375332			28.4	0.0188281	0.0422463	0.0773689	0.114355	0.128148	0.116538		28.4	0.0169003	0.0241497	0.0258411	0.0286975	0.0363469	0.0353433			28.4	0.0119623	0.0362843	0.0627985	0.100148	0.0955971	0.0833536		28.4	0.00524314	0.0171024	0.0183337
				28.6	0.0259029	0.0501627	0.0835646	0.107747	0.113043	0.132575		28.6	0.0148661	0.023142	0.0288158	0.0298216	0.0322551	0.0367634			28.6	0.0192571	0.0418687	0.0764628	0.113729	0.128822	0.117065		28.6	0.0180419	0.023386	0.0246453	0.0293493	0.0360597	0.0354387			28.6	0.0112518	0.0364224	0.0626058	0.0998939	0.0960811	0.0845777		28.6	0.00478963	0.0165393	0.019109
				28.8	0.0261022	0.049014	0.0837107	0.108064	0.112642	0.132576		28.8	0.014612	0.0217853	0.0289037	0.0291009	0.0314434	0.0376671			28.8	0.0200107	0.0402134	0.0771011	0.113765	0.128717	0.117278		28.8	0.0167542	0.0222011	0.0254918	0.0292817	0.0353247	0.0356695			28.8	0.0107694	0.0357837	0.0631446	0.100103	0.0955959	0.0850873		28.8	0.00513265	0.015268	0.0182608
				29	0.0259876	0.0489815	0.0834553	0.107717	0.112335	0.132695		29	0.014629	0.0219943	0.0281752	0.0289368	0.031515	0.0383056			29	0.0204612	0.0400467	0.0763929	0.113183	0.128334	0.118113		29	0.0161441	0.0221578	0.0255569	0.029357	0.0357546	0.0348246			29	0.0108999	0.0359814	0.0634919	0.100567	0.0968379	0.0852255		29	0.00436017	0.0153392	0.0190865
				29.2	0.0257924	0.0488094	0.0832421	0.108255	0.112007	0.133104		29.2	0.0139202	0.022058	0.0272108	0.0283262	0.0315331	0.0385236			29.2	0.0211863	0.038991	0.0759206	0.112414	0.127915	0.118906		29.2	0.0166333	0.0220589	0.0253318	0.0299429	0.035871	0.0352714			29.2	0.0109123	0.0360621	0.0635454	0.101114	0.0978181	0.0855851		29.2	0.00414529	0.0164941	0.0194107
				29.4	0.0257382	0.0500462	0.0841843	0.108742	0.113595	0.132875		29.4	0.0141593	0.02248	0.0262227	0.0285417	0.0316905	0.0380305			29.4	0.0223235	0.0390908	0.0754532	0.113141	0.126961	0.120341		29.4	0.0174673	0.0218284	0.0256223	0.0295403	0.0364663	0.0361507			29.4	0.0118456	0.0359538	0.0642963	0.101703	0.0971249	0.0859021		29.4	0.00492868	0.0157067	0.0183616
				29.6	0.0257658	0.0498015	0.0851308	0.108975	0.113147	0.132714		29.6	0.0147062	0.0227017	0.0255472	0.0283494	0.0315526	0.0373859			29.6	0.022339	0.0392646	0.0752414	0.113304	0.127686	0.12098		29.6	0.0171088	0.0222261	0.0254074	0.0285275	0.0383325	0.0366243			29.6	0.0113648	0.0373282	0.0645063	0.101379	0.0975066	0.0872345		29.6	0.00473905	0.0151854	0.0176927
				29.8	0.0246752	0.0502122	0.0862826	0.109104	0.112598	0.132165		29.8	0.0148608	0.0228309	0.0251955	0.0285659	0.0317404	0.0371444			29.8	0.0223357	0.0383363	0.0756673	0.112725	0.128789	0.121204		29.8	0.0149045	0.021892	0.0248752	0.0281785	0.0382721	0.0358512			29.8	0.0119526	0.0356807	0.0641482	0.102613	0.0976395	0.0871079		29.8	0.00454824	0.0140929	0.0170508
				30	0.0247137	0.0494465	0.0860612	0.108974	0.11226	0.131468		30	0.0143869	0.0225887	0.0252211	0.0281886	0.031555	0.0373174			30	0.0227958	0.0391234	0.0753774	0.112353	0.127899	0.121477		30	0.014398	0.0219446	0.0249545	0.0277531	0.0373829	0.0369444			30	0.0132411	0.0357883	0.0644155	0.102547	0.0974985	0.0883561		30	0.00463987	0.0123898	0.0166938
				30.2	0.0246058	0.0486838	0.0861022	0.108452	0.111599	0.130013		30.2	0.0136829	0.0227007	0.0252243	0.0290179	0.0312687	0.0380077			30.2	0.022107	0.0391125	0.0754287	0.111876	0.127971	0.122082		30.2	0.0139914	0.0201543	0.0245027	0.0282459	0.0367289	0.037461			30.2	0.0128258	0.0353019	0.064374	0.102642	0.0968647	0.0890447		30.2	0.00483806	0.0112072	0.0167573
				30.4	0.0241923	0.0491306	0.0870459	0.108229	0.112082	0.129658		30.4	0.0140648	0.0225352	0.0256431	0.0282807	0.0305628	0.0377792			30.4	0.0218871	0.0401356	0.0756786	0.11251	0.127264	0.122351		30.4	0.0143944	0.0201931	0.0247955	0.0280524	0.0364644	0.038224			30.4	0.0118507	0.0355962	0.0638614	0.103175	0.0968933	0.0886598		30.4	0.00493612	0.0112192	0.0174904
				30.6	0.0233486	0.0499301	0.0879508	0.107443	0.112267	0.129685		30.6	0.0139997	0.0226778	0.0252665	0.0289147	0.0300494	0.0375183			30.6	0.0221315	0.0413335	0.0763147	0.112277	0.126885	0.122934		30.6	0.0145616	0.0210502	0.0244688	0.0283748	0.0361411	0.0381204			30.6	0.0129114	0.035415	0.0644922	0.102607	0.0973292	0.0893164		30.6	0.00545524	0.0121703	0.0176614
				30.8	0.0234238	0.0496358	0.088489	0.107185	0.111097	0.129435		30.8	0.0143091	0.0230694	0.0247854	0.0285135	0.0285629	0.0369914			30.8	0.0216158	0.0415108	0.0761295	0.112136	0.12683	0.123085		30.8	0.0151041	0.021174	0.024182	0.0282865	0.0363025	0.0376442			30.8	0.0122541	0.0353706	0.0646084	0.101651	0.0970049	0.0888947		30.8	0.00564747	0.0139478	0.0170107
				31	0.0234646	0.0494554	0.0871612	0.10751	0.111136	0.130021		31	0.0138691	0.0243298	0.0249784	0.0290468	0.0271584	0.036824			31	0.0224395	0.042319	0.0760915	0.112355	0.126124	0.12349		31	0.0149233	0.0216519	0.0242001	0.0294927	0.0357629	0.0378519			31	0.0132946	0.0347166	0.0652467	0.10142	0.0977096	0.0888594		31	0.00542043	0.0138932	0.0166232
				31.2	0.0233811	0.0507491	0.0865944	0.107677	0.111628	0.130248		31.2	0.0130436	0.0243742	0.0251382	0.0295799	0.0259235	0.0372805			31.2	0.0222571	0.0428064	0.0763969	0.112092	0.125239	0.123434		31.2	0.0145805	0.0229813	0.0238255	0.0291146	0.0356636	0.0368862			31.2	0.0133878	0.0350811	0.064956	0.10171	0.0981723	0.0895057		31.2	0.0050338	0.0141641	0.0162567
				31.4	0.0231704	0.0513509	0.0860705	0.107557	0.110939	0.130125		31.4	0.0121598	0.0234538	0.0252865	0.0293241	0.0264734	0.0382847			31.4	0.0223854	0.0437562	0.0765552	0.111997	0.124544	0.123007		31.4	0.0147183	0.0232819	0.0239941	0.0293183	0.0353415	0.0370037			31.4	0.0140498	0.0358631	0.0642178	0.100948	0.0983453	0.0896734		31.4	0.005582	0.0142865	0.0163447
				31.6	0.0236251	0.0505964	0.0865598	0.108153	0.110934	0.130952		31.6	0.0119864	0.0229752	0.025896	0.0289226	0.0267668	0.0387849			31.6	0.0238313	0.0449077	0.0771584	0.111796	0.123713	0.123135		31.6	0.0142242	0.0225668	0.0246091	0.0289381	0.0346175	0.0364305			31.6	0.0144137	0.0377703	0.0638045	0.101866	0.09774	0.0888489		31.6	0.00647468	0.0140253	0.0161407
				31.8	0.0234951	0.0511213	0.0874298	0.108065	0.11071	0.131114		31.8	0.011808	0.0229152	0.0259918	0.0292583	0.0261493	0.0374997			31.8	0.0233868	0.0443935	0.0764861	0.112009	0.124104	0.122964		31.8	0.0145485	0.0215332	0.0247387	0.028378	0.0343758	0.0354679			31.8	0.0145157	0.039274	0.0646592	0.101139	0.0965912	0.0879316		31.8	0.00683889	0.0146511	0.0166251
				32	0.0233058	0.0520173	0.0874997	0.107685	0.110969	0.130824		32	0.0112339	0.0230769	0.0256803	0.029681	0.0262619	0.0369089			32	0.0232823	0.0445961	0.0771894	0.111935	0.124531	0.12273		32	0.0147507	0.0204828	0.0252697	0.0293008	0.0343191	0.0347207			32	0.0137327	0.0405646	0.0649593	0.102041	0.0981978	0.0868841		32	0.00673646	0.0141359	0.0167339
				32.2	0.0248254	0.0524547	0.0877672	0.107762	0.111039	0.130871		32.2	0.0112624	0.0229655	0.0257189	0.029208	0.0258586	0.0375213			32.2	0.0230941	0.0443741	0.0767039	0.110798	0.124423	0.121743		32.2	0.014914	0.020299	0.0261596	0.0285281	0.0348322	0.0340013			32.2	0.0133335	0.0412979	0.0645581	0.102419	0.0981164	0.0877127		32.2	0.00588657	0.0141203	0.016682
				32.4	0.0257903	0.0519559	0.0874582	0.109658	0.111544	0.131596		32.4	0.0109775	0.0222292	0.0266369	0.0290541	0.0260515	0.036672			32.4	0.0227145	0.0444836	0.0779056	0.11042	0.12437	0.12103		32.4	0.0155004	0.0183527	0.0268723	0.0279288	0.0343349	0.033547			32.4	0.0127705	0.0400319	0.0651328	0.102507	0.0971045	0.0876035		32.4	0.0057291	0.0130331	0.0163644
				32.6	0.0266553	0.0520788	0.0863655	0.110674	0.111101	0.133268		32.6	0.0114886	0.0225318	0.0280311	0.0281121	0.0271875	0.0367613			32.6	0.0228589	0.0443184	0.0781452	0.110746	0.124268	0.120292		32.6	0.0159155	0.0179151	0.0266616	0.0290432	0.0331292	0.0337606			32.6	0.0113581	0.0410202	0.0651234	0.102496	0.096697	0.0876445		32.6	0.00580149	0.0127835	0.0164899
				32.8	0.026604	0.0511433	0.0869238	0.110939	0.112189	0.133706		32.8	0.0116443	0.0225043	0.028503	0.0268781	0.0270194	0.0380506			32.8	0.0224215	0.0433381	0.0784599	0.111538	0.123771	0.119956		32.8	0.0158406	0.0181348	0.0277537	0.0281722	0.0330281	0.0343499			32.8	0.0111267	0.0402668	0.0646285	0.103404	0.0969788	0.0874037		32.8	0.00678053	0.0132885	0.0161969
				33	0.026934	0.0518183	0.0876173	0.110601	0.112243	0.133912		33	0.012255	0.0232355	0.0292076	0.0263162	0.028072	0.0381893			33	0.0225621	0.0431325	0.0783337	0.112202	0.124417	0.119984		33	0.0170113	0.0183501	0.0272209	0.0271336	0.033545	0.0341974			33	0.0104268	0.0403661	0.0659821	0.103738	0.0972825	0.087452		33	0.00538484	0.0133478	0.0161781
				33.2	0.0280146	0.0528872	0.0879486	0.111258	0.112923	0.134082		33.2	0.0124096	0.0228268	0.0297257	0.0260573	0.0295024	0.0373465			33.2	0.0232007	0.0419613	0.0776167	0.112989	0.124623	0.119019		33.2	0.0180969	0.0169399	0.0278369	0.0268903	0.0329918	0.0351993			33.2	0.00990994	0.0398515	0.0647255	0.104568	0.097223	0.0872845		33.2	0.00375351	0.0130583	0.0156737
				33.4	0.0281564	0.0536955	0.0886479	0.112099	0.114027	0.134448		33.4	0.0124144	0.0229791	0.0300929	0.0253851	0.0302367	0.0369579			33.4	0.023002	0.0425826	0.0775386	0.113907	0.125023	0.119367		33.4	0.0184098	0.0172672	0.0279407	0.0264673	0.0339948	0.0353506			33.4	0.0102664	0.0399157	0.0648165	0.104144	0.096939	0.088327		33.4	0.00374838	0.0116924	0.0144313
				33.6	0.0283094	0.053868	0.0893735	0.11128	0.113271	0.133737		33.6	0.0126956	0.0222478	0.0303658	0.0255717	0.0309744	0.0371293			33.6	0.021607	0.0410992	0.0780196	0.114466	0.126367	0.119477		33.6	0.0183826	0.0169912	0.0280472	0.0253039	0.0342957	0.0351992			33.6	0.0114398	0.0389578	0.0646611	0.1033	0.0962554	0.0894932		33.6	0.00305414	0.0107054	0.014279
				33.8	0.0279785	0.0530091	0.0885826	0.111623	0.1137	0.132941		33.8	0.0129253	0.0225365	0.0312349	0.0255462	0.0323795	0.0363486			33.8	0.0214756	0.041373	0.0783943	0.114124	0.126701	0.118602		33.8	0.0187484	0.0161978	0.0277639	0.02566	0.0339428	0.0350164			33.8	0.0117311	0.0375698	0.0644467	0.104378	0.0953019	0.090757		33.8	0.00356999	0.00996222	0.0144563
				34	0.0293456	0.0522879	0.0890612	0.11175	0.113951	0.132334		34	0.0127888	0.0228285	0.0307735	0.0249354	0.0328049	0.0363557			34	0.0212487	0.0421011	0.0783629	0.114144	0.126344	0.117665		34	0.018617	0.0163247	0.0288365	0.0257883	0.0342806	0.0360104			34	0.0116091	0.038381	0.0645044	0.105047	0.0952265	0.092289		34	0.00244801	0.010271	0.0145602
				34.2	0.029767	0.0526295	0.0889695	0.111301	0.114476	0.132873		34.2	0.0129067	0.0233459	0.029845	0.0250082	0.0331487	0.0360603			34.2	0.0217456	0.0427423	0.0779367	0.114184	0.1268	0.117524		34.2	0.0180754	0.015082	0.0286317	0.0260067	0.0346495	0.0365597			34.2	0.0108199	0.0385125	0.0653676	0.106778	0.0950058	0.0933732		34.2	0.00078205	0.012278	0.0146975
				34.4	0.0295065	0.0531956	0.0900205	0.111104	0.114576	0.13407		34.4	0.0136802	0.0224253	0.0293994	0.0252653	0.0332501	0.0360478			34.4	0.021658	0.0435402	0.079038	0.115069	0.126479	0.11822		34.4	0.0178639	0.015948	0.0283063	0.025313	0.0348038	0.0364613			34.4	0.010233	0.0383406	0.0649537	0.106893	0.0959225	0.0945184		34.4	0.00232353	0.0129131	0.0143512
				34.6	0.030105	0.0533021	0.0892012	0.111922	0.114719	0.132879		34.6	0.0131119	0.0229841	0.0285085	0.024959	0.0327118	0.0356398			34.6	0.0211624	0.0437018	0.0790758	0.114402	0.127146	0.119251		34.6	0.0167589	0.0168107	0.0276583	0.025717	0.0344706	0.0367136			34.6	0.0113564	0.038687	0.0660077	0.106905	0.0962441	0.0955946		34.6	0.00327084	0.0132636	0.0144596
				34.8	0.0303509	0.052576	0.0892059	0.111941	0.11496	0.132768		34.8	0.0126851	0.0232403	0.0282421	0.0259027	0.0319514	0.0356515			34.8	0.02091	0.0433772	0.0790752	0.114681	0.126904	0.120512		34.8	0.0166128	0.017602	0.0267866	0.0257607	0.0340891	0.0367302			34.8	0.0118599	0.0383436	0.0670019	0.106875	0.0963867	0.0959672		34.8	0.00254578	0.0143499	0.0144537
				35	0.0283448	0.0538401	0.0883224	0.111673	0.115553	0.132978		35	0.0119192	0.0230817	0.0276848	0.0261588	0.0306623	0.0370147			35	0.0214261	0.0444652	0.0801784	0.114686	0.127782	0.121377		35	0.015651	0.0188569	0.0268488	0.0264109	0.0340443	0.0364764			35	0.0129655	0.0385745	0.0665446	0.10811	0.0975471	0.0973845		35	0.0014047	0.0139349	0.0135805
				35.2	0.0274034	0.0532787	0.0884987	0.111937	0.115845	0.132054		35.2	0.0113358	0.0216442	0.0266563	0.0263283	0.0306526	0.0372363			35.2	0.0214506	0.0453153	0.0805131	0.114304	0.127807	0.121582		35.2	0.0147863	0.0190594	0.0265552	0.0265906	0.0336112	0.036231			35.2	0.0130001	0.0407443	0.0659524	0.107993	0.0975231	0.0976022		35.2	0.00219739	0.0141637	0.0133902
				35.4	0.0255396	0.0530105	0.0885758	0.111924	0.115907	0.132383		35.4	0.0111179	0.0201924	0.0253435	0.0254687	0.0294652	0.037445			35.4	0.0218112	0.0456711	0.0798586	0.113851	0.12818	0.121682		35.4	0.015019	0.0187744	0.0265275	0.0267406	0.0331079	0.036569			35.4	0.0137997	0.0410812	0.0659704	0.109076	0.0974856	0.0969366		35.4	0.00279449	0.0148143	0.0136076
				35.6	0.024906	0.0521494	0.087674	0.111363	0.115859	0.132406		35.6	0.0114739	0.020956	0.0247396	0.026494	0.0282044	0.0373183			35.6	0.0216501	0.0461464	0.0803106	0.113333	0.128097	0.121286		35.6	0.0154818	0.0189724	0.0263327	0.0272237	0.0332407	0.0362759			35.6	0.0153493	0.0419931	0.0665843	0.109022	0.0979403	0.0957199		35.6	0.00309237	0.0152669	0.0145413
				35.8	0.0238447	0.0522	0.0887221	0.110726	0.11541	0.132643		35.8	0.0119085	0.0208126	0.0237113	0.0273054	0.0263669	0.0371826			35.8	0.021022	0.0465708	0.0803757	0.113455	0.128317	0.121132		35.8	0.0152156	0.0180834	0.0267433	0.0277318	0.0334468	0.0357826			35.8	0.0152959	0.0421646	0.0668302	0.108073	0.0981202	0.095361		35.8	0.0037633	0.0154705	0.0149832
				36	0.0236027	0.0523734	0.0885413	0.111302	0.115566	0.132931		36	0.0120906	0.020479	0.0232775	0.0269244	0.0258816	0.0379595			36	0.0214282	0.04565	0.080897	0.112537	0.127994	0.121208		36	0.0136652	0.0179761	0.0258445	0.0277015	0.0329928	0.0359169			36	0.0145655	0.042185	0.0669154	0.109072	0.0992181	0.0937795		36	0.00494741	0.0148913	0.0142879
				36.2	0.0242992	0.0519796	0.0899345	0.111811	0.11519	0.133142		36.2	0.0123006	0.0212403	0.0240177	0.0259433	0.0258121	0.0377909			36.2	0.021367	0.0456575	0.0824893	0.112587	0.127397	0.120582		36.2	0.0138291	0.0186645	0.0258245	0.0276138	0.0324791	0.0356627			36.2	0.0150198	0.0426153	0.0662674	0.108778	0.0983177	0.0936731		36.2	0.00568437	0.0141664	0.0136204
				36.4	0.0248079	0.0510876	0.090644	0.112425	0.115487	0.134265		36.4	0.0122358	0.0216116	0.0240848	0.0260148	0.0257994	0.0365524			36.4	0.0207529	0.046169	0.0835149	0.113732	0.127393	0.120548		36.4	0.0136649	0.0179333	0.0255444	0.0272328	0.0318796	0.0361593			36.4	0.0142228	0.0428586	0.0661647	0.109947	0.0988065	0.0933224		36.4	0.00731847	0.0133817	0.0136817
				36.6	0.0251275	0.0507192	0.0909556	0.112312	0.115635	0.134833		36.6	0.012343	0.0213634	0.0241019	0.0253696	0.0260484	0.0366544			36.6	0.0207241	0.0457157	0.0826975	0.115054	0.127387	0.121075		36.6	0.012741	0.0188999	0.0244543	0.026923	0.030708	0.0367372			36.6	0.0142452	0.0440555	0.065139	0.109907	0.0997002	0.0937464		36.6	0.00711516	0.0125999	0.0129047
				36.8	0.0246576	0.0506215	0.0923695	0.11168	0.11587	0.135136		36.8	0.0119569	0.0203317	0.0240571	0.0249736	0.0256447	0.0366644			36.8	0.0215323	0.045044	0.0820562	0.115874	0.128486	0.121994		36.8	0.0135929	0.0192947	0.02428	0.0256016	0.0307654	0.0371539			36.8	0.0149611	0.042928	0.0648765	0.110025	0.100901	0.0926253		36.8	0.00797577	0.0124324	0.0120018
				37	0.0249158	0.0509606	0.0924166	0.111117	0.115532	0.135423		37	0.0125559	0.0196392	0.0255398	0.0248972	0.0255116	0.0362702			37	0.0221794	0.0448741	0.082824	0.116846	0.129015	0.122456		37	0.0145236	0.0184662	0.0240121	0.0245952	0.0308744	0.0367196			37	0.0147089	0.0419581	0.0647724	0.108557	0.100859	0.0920567		37	0.00662539	0.0109509	0.0114316
				37.2	0.0260727	0.0508726	0.0914753	0.110064	0.115634	0.135557		37.2	0.0118512	0.0195788	0.0259192	0.0240318	0.0263608	0.0357833			37.2	0.0227891	0.04499	0.0826359	0.117132	0.129323	0.12188		37.2	0.0152238	0.0180019	0.024258	0.0246064	0.0299365	0.0362497			37.2	0.0151382	0.0407772	0.0635363	0.108276	0.101287	0.0921528		37.2	0.00626424	0.0105428	0.0113865
				37.4	0.0264108	0.0506881	0.0911266	0.109826	0.115923	0.135512		37.4	0.011592	0.0197904	0.0261229	0.0241281	0.0261619	0.036087			37.4	0.0222965	0.0452731	0.0826623	0.116531	0.12974	0.122535		37.4	0.0157682	0.0183634	0.0237222	0.0240926	0.0307576	0.0360239			37.4	0.0155341	0.0407149	0.0635099	0.108375	0.101858	0.0922764		37.4	0.00676887	0.0105917	0.0111184
				37.6	0.0272689	0.0502016	0.0917807	0.108587	0.115639	0.135221		37.6	0.0119191	0.0195588	0.0271683	0.0247122	0.0270919	0.0353054			37.6	0.0215027	0.0449008	0.0830475	0.115681	0.130431	0.122161		37.6	0.0166126	0.0178987	0.0237859	0.022051	0.0301565	0.0359479			37.6	0.0166531	0.0402759	0.0637395	0.108331	0.101234	0.0926657		37.6	0.00716894	0.0115045	0.012041
				37.8	0.02861	0.0499754	0.0897415	0.109064	0.115627	0.134815		37.8	0.0124913	0.0198552	0.0271212	0.0246557	0.0269832	0.0348989			37.8	0.0216209	0.0450227	0.0834698	0.115517	0.130756	0.121311		37.8	0.0167712	0.0168438	0.0241975	0.022298	0.0309567	0.035016			37.8	0.0154169	0.0410394	0.0641459	0.108286	0.101563	0.0922539		37.8	0.00687888	0.0125324	0.011834
				38	0.0305952	0.0503875	0.0903803	0.109542	0.115931	0.135124		38	0.0129242	0.0199992	0.0264902	0.0239003	0.0273059	0.0347439			38	0.0224651	0.0449083	0.0833347	0.116123	0.13053	0.122146		38	0.0145665	0.017083	0.0241509	0.0216316	0.0305405	0.0350654			38	0.0154548	0.0416926	0.0651401	0.108327	0.102172	0.0924881		38	0.00613967	0.0127652	0.0113246
				38.2	0.0308999	0.0505533	0.0893629	0.109542	0.115987	0.135741		38.2	0.0131626	0.0201127	0.0258968	0.0242688	0.0282865	0.0341002			38.2	0.0231708	0.0446022	0.0833004	0.117128	0.131039	0.12244		38.2	0.0148233	0.0170667	0.023023	0.020631	0.0301219	0.0348618			38.2	0.0146755	0.0426204	0.0667056	0.108184	0.10198	0.0925401		38.2	0.00625997	0.012227	0.0112378
				38.4	0.0310777	0.0512347	0.0886099	0.109981	0.116	0.135379		38.4	0.0135239	0.0197026	0.0255529	0.0243118	0.0285171	0.0346311			38.4	0.022975	0.0448525	0.0840658	0.117495	0.131338	0.123308		38.4	0.0146395	0.0180124	0.0227764	0.0194666	0.0311552	0.0338933			38.4	0.0143176	0.0414247	0.0665212	0.107922	0.102438	0.0925119		38.4	0.00714264	0.0104166	0.0124636
				38.6	0.0310178	0.0520971	0.0878215	0.109921	0.116075	0.135858		38.6	0.0122839	0.0207154	0.0246767	0.0249356	0.0281231	0.0342548			38.6	0.0220826	0.0448687	0.0840324	0.117666	0.132159	0.1238		38.6	0.0148769	0.0193389	0.0227552	0.018884	0.0316383	0.0341312			38.6	0.0146906	0.0410899	0.0686446	0.108546	0.102887	0.0920545		38.6	0.00661251	0.0104567	0.0145282
				38.8	0.030554	0.0520984	0.0875848	0.109662	0.116164	0.135978		38.8	0.0120764	0.0206397	0.0243385	0.025131	0.02758	0.0348873			38.8	0.0224664	0.0451776	0.0840419	0.119304	0.132011	0.123985		38.8	0.0148163	0.0196548	0.0220802	0.0185296	0.0323407	0.0333796			38.8	0.0144615	0.0405408	0.0687795	0.108679	0.102873	0.0918697		38.8	0.00512009	0.0108339	0.0143969
				39	0.0281535	0.0527737	0.0868685	0.110578	0.116635	0.136437		39	0.0129028	0.0197983	0.0240326	0.0248719	0.0264088	0.0348144			39	0.0225371	0.0454552	0.0831831	0.119719	0.13308	0.123669		39	0.0137772	0.0202405	0.0222265	0.0182332	0.0331118	0.0329161			39	0.0137166	0.0405148	0.0692406	0.108204	0.103294	0.0931497		39	0.00465305	0.0105094	0.0136121
				39.2	0.0288026	0.0518705	0.0862512	0.111383	0.115532	0.136633		39.2	0.0122706	0.0199954	0.0227857	0.025046	0.0265179	0.0351205			39.2	0.0229354	0.0455174	0.0820534	0.119992	0.132961	0.122869		39.2	0.0135513	0.02016	0.0221841	0.0188175	0.0335952	0.0333688			39.2	0.0126151	0.0416036	0.0689412	0.107444	0.102998	0.0928461		39.2	0.00440831	0.0109577	0.0140613
				39.4	0.0284833	0.0520526	0.0858148	0.111303	0.115594	0.137727		39.4	0.0126639	0.0201197	0.0223018	0.0246872	0.0262008	0.0354997			39.4	0.0231409	0.0451709	0.0813272	0.119788	0.13293	0.122415		39.4	0.0150363	0.0202635	0.0215772	0.0192945	0.0342313	0.0329557			39.4	0.0134446	0.0413196	0.0691821	0.108118	0.103545	0.0917836		39.4	0.00379669	0.0118211	0.0135745
				39.6	0.0284749	0.0521349	0.0854663	0.110913	0.115703	0.137039		39.6	0.0130657	0.0208543	0.0221748	0.0256465	0.0271357	0.0357392			39.6	0.0226035	0.0450145	0.0812291	0.119834	0.131928	0.122528		39.6	0.0150151	0.0204086	0.0213359	0.0205594	0.0346581	0.0339345			39.6	0.0142515	0.0427456	0.0700919	0.106548	0.102774	0.0918748		39.6	0.00272717	0.0122027	0.0143435
				39.8	0.0280531	0.052537	0.0865364	0.11067	0.116041	0.137586		39.8	0.0127728	0.020999	0.021787	0.0253922	0.0274064	0.0367907			39.8	0.0225692	0.044448	0.0814815	0.119821	0.131315	0.123157		39.8	0.0151589	0.0202964	0.0213431	0.0208562	0.0343933	0.0334485			39.8	0.0135038	0.0440018	0.0706182	0.10687	0.102051	0.0911215		39.8	0.00397079	0.0121208	0.0136681
				40	0.0283234	0.0529672	0.0871318	0.110922	0.116603	0.137241		40	0.0134587	0.0205769	0.0220809	0.0237963	0.0282488	0.037009			40	0.0228929	0.0435903	0.0798344	0.119205	0.130747	0.124062		40	0.0144011	0.0214232	0.0204691	0.0209673	0.0333744	0.0335177			40	0.0134615	0.0438897	0.0715656	0.108137	0.101665	0.0916544		40	0.00417688	0.0118586	0.0129781
				40.2	0.0288428	0.0534235	0.0880264	0.111093	0.116116	0.138138		40.2	0.0136335	0.0194522	0.0220303	0.0241812	0.0278334	0.0365183			40.2	0.0233712	0.0445567	0.0799761	0.119454	0.131461	0.124653		40.2	0.0148505	0.0221791	0.0205651	0.0221287	0.0333983	0.0322672			40.2	0.0135181	0.0439264	0.070938	0.108068	0.101539	0.0916859		40.2	0.0046498	0.0116098	0.0112429
				40.4	0.0292344	0.0529631	0.0879686	0.111132	0.116805	0.138815		40.4	0.0135885	0.0186638	0.0213417	0.0246963	0.02741	0.0365411			40.4	0.0239018	0.0441839	0.0791196	0.11888	0.131089	0.12607		40.4	0.0146222	0.0221518	0.0208471	0.0219618	0.0335893	0.0318942			40.4	0.0130782	0.0443035	0.0707845	0.108522	0.101877	0.0922092		40.4	0.00400009	0.011914	0.0104636
				40.6	0.0284854	0.0537843	0.0880963	0.110899	0.11685	0.138513		40.6	0.0129959	0.0174625	0.021202	0.0246063	0.0263854	0.0367138			40.6	0.0249481	0.0440662	0.079146	0.117988	0.131406	0.12702		40.6	0.0146333	0.0226675	0.0199802	0.0228378	0.0329792	0.0311201			40.6	0.0140849	0.0441076	0.0707033	0.107783	0.1012	0.0914943		40.6	0.00353492	0.0131796	0.00801106
				40.8	0.0275299	0.0543536	0.0884164	0.110347	0.116262	0.139234		40.8	0.0136939	0.0168223	0.0212178	0.0248861	0.0259328	0.0361018			40.8	0.0257788	0.044071	0.0802199	0.116837	0.131628	0.127218		40.8	0.0165631	0.0221036	0.0199087	0.0235859	0.0327797	0.029809			40.8	0.0143658	0.0429467	0.0705279	0.107053	0.10172	0.0909843		40.8	0.00357541	0.0133082	0.00751846
				41	0.0268424	0.0540301	0.0881447	0.110327	0.116499	0.139299		41	0.0142688	0.0163402	0.0217614	0.024688	0.0254048	0.0361287			41	0.0264423	0.0440672	0.0814256	0.116049	0.131564	0.12751		41	0.0179434	0.0218757	0.0201028	0.0238312	0.0326663	0.0287733			41	0.0136298	0.0429401	0.0696541	0.106631	0.10149	0.0915733		41	0.00256202	0.0132787	0.00737187
				41.2	0.027849	0.0540066	0.0886899	0.109489	0.116644	0.139494		41.2	0.0132095	0.0162538	0.0215187	0.0250542	0.0263441	0.0365023			41.2	0.0273523	0.044712	0.0813178	0.115014	0.132049	0.12694		41.2	0.0181888	0.0208744	0.0205619	0.0244224	0.0317735	0.0286957			41.2	0.0137162	0.0422207	0.0698956	0.106771	0.10167	0.0920655		41.2	0.00142095	0.0141794	0.00730419
				41.4	0.028257	0.0537298	0.0894624	0.109339	0.116125	0.139054		41.4	0.0132026	0.0158536	0.0212054	0.0251262	0.025951	0.0356179			41.4	0.0268343	0.0451457	0.0816004	0.113372	0.132079	0.127685		41.4	0.017868	0.0202567	0.0204401	0.0248201	0.0310727	0.028666			41.4	0.0135691	0.0429385	0.0699514	0.106802	0.100936	0.0917349		41.4	0.00110092	0.0138575	0.00777413
				41.6	0.0292321	0.053042	0.0898128	0.10921	0.115963	0.139774		41.6	0.0138751	0.0154495	0.0218597	0.0252654	0.0264039	0.0356943			41.6	0.0265342	0.0459395	0.0829042	0.112695	0.131763	0.127255		41.6	0.0180141	0.0193838	0.0200222	0.0252225	0.0306437	0.0283572			41.6	0.0138097	0.0419621	0.0691133	0.10644	0.101139	0.0913219		41.6	0.00228979	0.0147836	0.00805818
				41.8	0.029828	0.0531764	0.0893791	0.109783	0.116721	0.139169		41.8	0.0146898	0.0161655	0.0204477	0.0255043	0.0257164	0.0360001			41.8	0.0262338	0.0460692	0.0834601	0.112964	0.130985	0.127655		41.8	0.0177283	0.0182445	0.0193665	0.0257436	0.0307074	0.0284638			41.8	0.0132053	0.0416663	0.0690913	0.105574	0.100445	0.0919855		41.8	0.00189891	0.0141686	0.00640433
				42	0.0301497	0.0521284	0.0906842	0.11024	0.116855	0.138755		42	0.0155612	0.017164	0.0203796	0.0251509	0.0258671	0.0356118			42	0.0268164	0.0467429	0.0832022	0.113074	0.131184	0.127479		42	0.0168179	0.0172367	0.0194634	0.0254163	0.0303422	0.029049			42	0.0141075	0.0405862	0.0691277	0.105158	0.099314	0.0931899		42	0.00210722	0.013123	0.00826
				42.2	0.0290236	0.051845	0.0903185	0.109552	0.116238	0.138806		42.2	0.0162725	0.0180774	0.0195337	0.0249765	0.0261404	0.0357327			42.2	0.0258729	0.0470334	0.0840289	0.114059	0.131078	0.126106		42.2	0.0159478	0.0165742	0.0189818	0.0245304	0.0305966	0.0290068			42.2	0.0142506	0.0402795	0.0691352	0.104805	0.0992587	0.0934973		42.2	0.00287158	0.0114518	0.00995732
				42.4	0.0289198	0.0524326	0.090627	0.109693	0.117078	0.138744		42.4	0.016404	0.0191506	0.0185475	0.0251807	0.0259235	0.0356636			42.4	0.0256676	0.0477262	0.0853331	0.11423	0.130741	0.126069		42.4	0.0146659	0.0168673	0.0190061	0.0232236	0.0312029	0.0290089			42.4	0.0147066	0.0387617	0.0682262	0.105471	0.100293	0.0940268		42.4	0.00309931	0.0109469	0.0107998
				42.6	0.0292778	0.0526269	0.0909469	0.109797	0.116603	0.138869		42.6	0.0162099	0.0196868	0.0179585	0.0247059	0.0247721	0.0350502			42.6	0.0253956	0.0479329	0.0852995	0.114785	0.130881	0.125435		42.6	0.01407	0.0165404	0.0178499	0.0233351	0.0311798	0.0293918			42.6	0.0143154	0.0389274	0.0689392	0.105565	0.100808	0.0943101		42.6	0.00363093	0.0109975	0.0117971
				42.8	0.0296755	0.0528834	0.0911185	0.109963	0.116178	0.137551		42.8	0.0157511	0.0201467	0.0179966	0.0233466	0.0243565	0.0346797			42.8	0.0251634	0.0476094	0.0847784	0.116195	0.130112	0.124403		42.8	0.0129224	0.0156293	0.0175779	0.0235248	0.030953	0.0297505			42.8	0.0135888	0.0402918	0.0683118	0.105089	0.100974	0.0952733		42.8	0.00329326	0.0103076	0.012182
				43	0.0288858	0.0528904	0.0907966	0.110478	0.116005	0.138048		43	0.0156926	0.0202553	0.0174546	0.0238731	0.0242798	0.0335965			43	0.0241336	0.0474397	0.0843143	0.117421	0.129587	0.12398		43	0.0118187	0.0147421	0.0179193	0.0234931	0.0309409	0.0301277			43	0.0133008	0.0403864	0.0685773	0.104426	0.101156	0.0967108		43	0.00376388	0.0101963	0.0134396
				43.2	0.0298462	0.05239	0.0905026	0.111212	0.115749	0.137745		43.2	0.0145372	0.0208463	0.0174913	0.0231054	0.0246233	0.0338054			43.2	0.0240254	0.0470818	0.0844126	0.117208	0.129604	0.123238		43.2	0.012216	0.0141258	0.0180953	0.0224359	0.0312531	0.0308533			43.2	0.0134057	0.0414644	0.0683035	0.104709	0.100582	0.0957437		43.2	0.00358479	0.00999244	0.0136685
				43.4	0.0299249	0.0526188	0.0906506	0.111146	0.116385	0.137272		43.4	0.014524	0.0201786	0.0182985	0.0228384	0.024956	0.0338779			43.4	0.0233883	0.0473915	0.0846177	0.118091	0.129855	0.122979		43.4	0.0132887	0.0133918	0.0179443	0.0220118	0.0309072	0.0313806			43.4	0.0147643	0.0415188	0.0694931	0.105073	0.100274	0.0952694		43.4	0.00330728	0.0100311	0.0144193
				43.6	0.0290133	0.0533349	0.0896412	0.11107	0.117817	0.136372		43.6	0.0136255	0.0201464	0.0196501	0.0232497	0.0253409	0.0333462			43.6	0.0226023	0.0464996	0.0847727	0.118153	0.129456	0.123831		43.6	0.0124523	0.0134026	0.0189625	0.0219233	0.0302017	0.0317948			43.6	0.014694	0.0419277	0.0706019	0.105305	0.0993072	0.0960144		43.6	0.00337199	0.0106336	0.0157374
				43.8	0.0284501	0.0534493	0.0901114	0.110981	0.117875	0.136079		43.8	0.0131168	0.019682	0.0201289	0.0222035	0.0247083	0.0341262			43.8	0.0227791	0.0464923	0.0844962	0.118152	0.129164	0.124849		43.8	0.0126282	0.0132667	0.0191094	0.0204209	0.0304913	0.0311999			43.8	0.0140537	0.0421236	0.0713915	0.106857	0.099205	0.0960078		43.8	0.00466671	0.0106802	0.0146803
				44	0.0284188	0.053727	0.0900416	0.111128	0.118499	0.136795		44	0.01305	0.018265	0.0208673	0.0211481	0.0244261	0.0342			44	0.0227904	0.0459694	0.0832821	0.118103	0.128471	0.124359		44	0.0123839	0.0133931	0.0193972	0.0199762	0.0305051	0.0314703			44	0.0134166	0.0413069	0.0717934	0.108158	0.100214	0.0966052		44	0.00412148	0.0112643	0.015175
				44.2	0.0289201	0.0538628	0.0900344	0.11175	0.118405	0.137402		44.2	0.0121716	0.0172311	0.0211736	0.0216373	0.0236782	0.0343793			44.2	0.0234719	0.0460966	0.0833216	0.118463	0.129184	0.124681		44.2	0.0129358	0.0136449	0.0194677	0.0190561	0.0303809	0.0313784			44.2	0.0135843	0.0406881	0.0728059	0.107242	0.100937	0.0954092		44.2	0.00470774	0.0119002	0.0142745
				44.4	0.02879	0.0539411	0.0896502	0.112214	0.119024	0.137315		44.4	0.0116498	0.017917	0.0221895	0.0215164	0.0240069	0.0338508			44.4	0.0237695	0.045627	0.0840494	0.118778	0.128615	0.124827		44.4	0.013453	0.0142145	0.0191551	0.0183194	0.0296176	0.0315513			44.4	0.0136343	0.0420088	0.0740769	0.10867	0.101734	0.0958352		44.4	0.00399206	0.0127217	0.0134319
				44.6	0.0275876	0.0545346	0.0895806	0.11281	0.118962	0.137525		44.6	0.0112332	0.0184723	0.0222624	0.0218506	0.0237193	0.0336647			44.6	0.0241348	0.046457	0.0847483	0.118754	0.129128	0.124602		44.6	0.01442	0.0142286	0.0178448	0.0187167	0.0285658	0.0317582			44.6	0.0140886	0.0422361	0.0750948	0.109084	0.102753	0.0965518		44.6	0.00431624	0.0131144	0.0125158
				44.8	0.0275688	0.0541982	0.089348	0.113392	0.118723	0.137564		44.8	0.0112477	0.0176651	0.0224006	0.0223292	0.0234894	0.0339652			44.8	0.02474	0.0455723	0.084731	0.11945	0.129447	0.125088		44.8	0.015461	0.0142215	0.0181012	0.0185939	0.0284199	0.0312805			44.8	0.0140575	0.0423862	0.0755002	0.109116	0.104063	0.0975834		44.8	0.00298185	0.0128345	0.0126782
				45	0.0273465	0.0540043	0.0900228	0.1138	0.118774	0.138205		45	0.0106415	0.0172279	0.0225642	0.0224619	0.0239763	0.03482			45	0.0261288	0.0452399	0.0847858	0.120503	0.130774	0.126169		45	0.0156586	0.0140523	0.0188996	0.018324	0.028074	0.0318395			45	0.0126702	0.0427001	0.0760223	0.110136	0.10414	0.0970628		45	0.00238394	0.0138071	0.0124084
				45.2	0.0278378	0.0541874	0.0894385	0.113078	0.1189	0.13881		45.2	0.0106582	0.0174655	0.0233409	0.0232466	0.0243985	0.0352047			45.2	0.0264176	0.0456792	0.0846991	0.121681	0.131739	0.126736		45.2	0.0155134	0.0134719	0.0185204	0.0184077	0.0277515	0.0319715			45.2	0.0133287	0.0425721	0.076271	0.109746	0.105108	0.0970824		45.2	0.00064781	0.0139137	0.0118972
				45.4	0.0284806	0.054532	0.0887543	0.112888	0.117571	0.139149		45.4	0.0116064	0.0181396	0.0233157	0.023723	0.0239363	0.0346171			45.4	0.0260662	0.0460936	0.0843965	0.120384	0.131714	0.127681		45.4	0.0152525	0.0143675	0.0185885	0.0191763	0.0270073	0.0317406			45.4	0.0138615	0.042775	0.0755187	0.110114	0.105299	0.0966849		45.4	0.00061049	0.0134795	0.0118519
				45.6	0.0289431	0.0547195	0.0874261	0.114161	0.117829	0.139736		45.6	0.0118396	0.0183294	0.0233507	0.0254341	0.0242585	0.0355575			45.6	0.0255049	0.0465393	0.0835692	0.120846	0.131694	0.128389		45.6	0.0151737	0.0137065	0.0187489	0.0188068	0.0279516	0.0324391			45.6	0.0133858	0.0418661	0.0740673	0.11031	0.106693	0.0955818		45.6	0.00119812	0.0150632	0.0113336
				45.8	0.0291717	0.0553484	0.0881758	0.114838	0.117592	0.139397		45.8	0.0122212	0.0188911	0.022164	0.0268154	0.0243895	0.0353322			45.8	0.0252771	0.046917	0.0829302	0.121208	0.132018	0.128417		45.8	0.0143221	0.0142301	0.0189751	0.0185162	0.0282153	0.0331449			45.8	0.0140035	0.0416249	0.0744549	0.109659	0.106957	0.0956215		45.8	0.0014101	0.0154975	0.0115518
				46	0.0299329	0.0554955	0.0891921	0.115841	0.116613	0.139941		46	0.0135741	0.019394	0.0216718	0.0264755	0.0249015	0.0353405			46	0.0257881	0.0464664	0.0824306	0.120773	0.132642	0.128716		46	0.0135481	0.0147706	0.0196272	0.0188178	0.0286146	0.0334838			46	0.0148522	0.0413262	0.0745829	0.108904	0.108082	0.0957578		46	0.00139985	0.0146587	0.0134162
				46.2	0.0300835	0.0560837	0.0895452	0.11652	0.116162	0.1414		46.2	0.0142497	0.019044	0.0217348	0.0255775	0.0255639	0.0343116			46.2	0.024912	0.0470982	0.0836609	0.121086	0.133258	0.129003		46.2	0.0128688	0.0156073	0.0196108	0.0190029	0.0285244	0.0331311			46.2	0.0163091	0.0416692	0.073296	0.108301	0.110073	0.0966333		46.2	0.00177361	0.0132213	0.0126367
				46.4	0.0304235	0.0580793	0.090029	0.117529	0.116163	0.141573		46.4	0.0143024	0.0196586	0.0206614	0.0252367	0.026377	0.0339561			46.4	0.0254001	0.0471555	0.0846052	0.120336	0.13355	0.129437		46.4	0.0126835	0.0160142	0.0194011	0.0200521	0.0270941	0.0328321			46.4	0.0164082	0.0416763	0.0726081	0.108236	0.110785	0.0976699		46.4	0.00079781	0.0128575	0.0113966
				46.6	0.0311185	0.0576761	0.0899454	0.117362	0.114802	0.141946		46.6	0.0138778	0.0194528	0.0199348	0.0234383	0.0257058	0.0325868			46.6	0.0248615	0.0467691	0.0841662	0.120048	0.133516	0.128978		46.6	0.0121825	0.0157528	0.0189596	0.0214169	0.0273568	0.0318771			46.6	0.0156337	0.0415974	0.0724697	0.108043	0.110408	0.0979168		46.6	0.00130261	0.0132642	0.0119785
				46.8	0.0307854	0.0583294	0.0898219	0.117219	0.114146	0.141466		46.8	0.0138195	0.0194443	0.0199705	0.0230044	0.0264276	0.0308941			46.8	0.0243733	0.0458207	0.0847679	0.120719	0.13265	0.129521		46.8	0.0124544	0.0151321	0.0199767	0.0217257	0.0270261	0.0311483			46.8	0.0158483	0.042	0.0708196	0.107459	0.110832	0.098125		46.8	0.00045506	0.0126175	0.0127532
				47	0.0307505	0.0577813	0.0894807	0.117699	0.113979	0.142816		47	0.0141597	0.018221	0.0191806	0.022079	0.025881	0.030585			47	0.0241349	0.0463097	0.0862668	0.120488	0.132368	0.130575		47	0.0117993	0.0148123	0.0203292	0.0209592	0.0269141	0.0311888			47	0.016403	0.0415321	0.0697862	0.107805	0.110274	0.0967376		47	0.00153602	0.0119341	0.012997
				47.2	0.0311994	0.058079	0.0906943	0.117584	0.113833	0.142594		47.2	0.0143027	0.0182964	0.0188391	0.0214866	0.0262438	0.0300594			47.2	0.0239123	0.0458573	0.0855932	0.119204	0.133063	0.129522		47.2	0.0116042	0.0144845	0.0205389	0.0208051	0.0283315	0.0311017			47.2	0.0164487	0.0403151	0.0693667	0.108587	0.109741	0.0956536		47.2	0.00160436	0.0117035	0.012258
				47.4	0.0317303	0.0582702	0.0905787	0.116744	0.112853	0.14161		47.4	0.0141567	0.0179816	0.018379	0.0210095	0.0258271	0.0293704			47.4	0.0244031	0.0469398	0.0853108	0.119119	0.13329	0.129008		47.4	0.011548	0.0142932	0.0214382	0.0206769	0.0278416	0.0306714			47.4	0.0165061	0.0392866	0.0682169	0.10907	0.108715	0.0954778		47.4	0.0011642	0.0119985	0.0122206
				47.6	0.0309522	0.0590094	0.0901643	0.116367	0.113629	0.140981		47.6	0.0138082	0.0179398	0.0188297	0.020771	0.0256675	0.0284343			47.6	0.0245956	0.0469147	0.0846692	0.118327	0.133417	0.129783		47.6	0.0112943	0.0149398	0.0211899	0.0205323	0.0276348	0.0295898			47.6	0.0155548	0.0392622	0.0676549	0.109473	0.107443	0.095068		47.6	0.00288033	0.0130443	0.0120439
				47.8	0.0308626	0.0586739	0.0917447	0.116104	0.112877	0.141546		47.8	0.0129721	0.0175038	0.0181032	0.0195899	0.0246553	0.0289033			47.8	0.0251022	0.0469451	0.0844029	0.117905	0.13379	0.128189		47.8	0.0112036	0.0152322	0.0211408	0.0196013	0.0285626	0.029485			47.8	0.0152595	0.0399146	0.0666644	0.110292	0.107018	0.0949371		47.8	0.00322368	0.01214	0.0112703
				48	0.0315711	0.0587906	0.0918677	0.115751	0.113279	0.141926		48	0.013059	0.0169115	0.0179641	0.0191054	0.0241855	0.0286742			48	0.0251379	0.046703	0.0848124	0.118333	0.132989	0.126707		48	0.0107958	0.0153907	0.0212363	0.0202365	0.0285003	0.0287526			48	0.0147428	0.039151	0.0664625	0.110801	0.106607	0.095888		48	0.00411277	0.0125738	0.0115705
				48.2	0.0311201	0.0582584	0.0919871	0.11634	0.113972	0.142325		48.2	0.0131939	0.0170493	0.0180546	0.0187803	0.0239182	0.0287371			48.2	0.0253192	0.0467649	0.0848608	0.119161	0.1343	0.126624		48.2	0.0116789	0.0160214	0.0201978	0.0202819	0.0271093	0.0282087			48.2	0.0143777	0.0392306	0.0671047	0.111094	0.105283	0.0969521		48.2	0.00452665	0.0120246	0.0114964
				48.4	0.030551	0.0581322	0.0917519	0.115725	0.114396	0.141685		48.4	0.0125276	0.0174373	0.0176284	0.0186192	0.0237114	0.0277439			48.4	0.0253129	0.0464929	0.0855008	0.119838	0.134499	0.126481		48.4	0.0121217	0.0157723	0.0195615	0.0202371	0.0263125	0.0278462			48.4	0.0148189	0.0402862	0.0669392	0.112774	0.104159	0.0975169		48.4	0.00515059	0.0124039	0.0114461
				48.6	0.0303025	0.0574812	0.0916726	0.115044	0.115562	0.141044		48.6	0.0120757	0.0169471	0.0169612	0.0190109	0.0236954	0.0280454			48.6	0.0259199	0.0466084	0.085807	0.12003	0.133938	0.127018		48.6	0.0125829	0.0151999	0.0189425	0.0211609	0.0256819	0.0284534			48.6	0.0152543	0.0417506	0.0669875	0.112375	0.103477	0.0980373		48.6	0.00524449	0.0128526	0.0121435
				48.8	0.0300546	0.0564035	0.092151	0.114381	0.115958	0.140311		48.8	0.0113385	0.016328	0.0173597	0.0194539	0.0233107	0.0292187			48.8	0.0265351	0.0462158	0.0854642	0.119986	0.13334	0.127075		48.8	0.0127262	0.0156296	0.0189974	0.0209574	0.0261098	0.0280944			48.8	0.0140587	0.0419833	0.0682122	0.112534	0.101834	0.0973895		48.8	0.00580478	0.0132827	0.0116012
				49	0.0298671	0.0568328	0.0932123	0.113824	0.116698	0.139765		49	0.0117633	0.0166431	0.0176705	0.0190525	0.0232274	0.0303269			49	0.026935	0.0461944	0.0853994	0.120403	0.134529	0.12679		49	0.0127292	0.0153846	0.0192841	0.0203433	0.0264493	0.0275391			49	0.013447	0.0432748	0.0682572	0.112536	0.0997496	0.0959522		49	0.00579265	0.0141793	0.011186
				49.2	0.0300566	0.0564908	0.092698	0.112756	0.116649	0.139534		49.2	0.0121842	0.0161854	0.0182165	0.020422	0.0232126	0.0305165			49.2	0.0263844	0.0473558	0.0845004	0.120787	0.134868	0.127183		49.2	0.0132979	0.0152824	0.0188749	0.0205169	0.0266723	0.0269414			49.2	0.0140453	0.0444336	0.0676943	0.112032	0.100039	0.0962313		49.2	0.00615259	0.0141329	0.0106036
				49.4	0.0302065	0.0564373	0.0929989	0.11276	0.116461	0.139016		49.4	0.0121695	0.0169783	0.0174071	0.0217493	0.0233675	0.0310928			49.4	0.0261985	0.0483427	0.084348	0.120383	0.134719	0.127		49.4	0.0139606	0.0151226	0.0202243	0.0209895	0.025954	0.0273291			49.4	0.0136753	0.0448976	0.0675946	0.112683	0.099653	0.0954584		49.4	0.00671026	0.0151786	0.0102623
				49.6	0.0300257	0.0569392	0.093783	0.114033	0.117309	0.138835		49.6	0.0121642	0.0165953	0.0177462	0.0238018	0.0243167	0.0318826			49.6	0.025504	0.04874	0.0845721	0.120095	0.133581	0.127683		49.6	0.0143514	0.0147943	0.0204305	0.0209633	0.0267278	0.0274523			49.6	0.0136003	0.045191	0.0682203	0.111749	0.0998068	0.0952034		49.6	0.00669329	0.0162573	0.00998234
				49.8	0.0308467	0.0570928	0.0945338	0.114322	0.117887	0.139949		49.8	0.0130183	0.016565	0.0185826	0.0243045	0.0254914	0.0326398			49.8	0.0261311	0.0488955	0.0842912	0.118856	0.133932	0.127573		49.8	0.014305	0.0153534	0.0196387	0.020809	0.0259638	0.0278167			49.8	0.014205	0.0457284	0.0699899	0.111036	0.101176	0.0951557		49.8	0.00613409	0.0160088	0.00856366
				50	0.0308104	0.0575433	0.094456	0.114627	0.117848	0.141014		50	0.0139489	0.0167239	0.0191494	0.02336	0.0264934	0.0328956			50	0.0254942	0.0488032	0.0838521	0.117688	0.133735	0.129663		50	0.0153027	0.0153381	0.0199665	0.0205783	0.0256198	0.0277295			50	0.0143855	0.0452991	0.0700174	0.11024	0.101305	0.0964584		50	0.00547845	0.0142715	0.00798307
				50.2	0.0306031	0.0575896	0.0944498	0.115051	0.117782	0.14066		50.2	0.0140292	0.0165087	0.0200628	0.0230729	0.0271126	0.0320545			50.2	0.0246942	0.0496831	0.0845976	0.117682	0.133861	0.130297		50.2	0.0153357	0.0155802	0.0202875	0.0208178	0.0244873	0.027087			50.2	0.0149487	0.0454882	0.0709268	0.109931	0.101892	0.0976109		50.2	0.00540318	0.0145248	0.0071441
				50.4	0.0309606	0.0574748	0.0950233	0.11545	0.117664	0.139366		50.4	0.0139128	0.0167632	0.0199772	0.0226002	0.0271623	0.0322211			50.4	0.0253934	0.0493736	0.0845433	0.118308	0.132824	0.130139		50.4	0.0148816	0.0163125	0.0205109	0.0215597	0.0233315	0.0269859			50.4	0.0152655	0.0446376	0.0717755	0.109864	0.102508	0.0973427		50.4	0.00521816	0.0144893	0.00621819
				50.6	0.0318549	0.0554905	0.0950803	0.115718	0.118341	0.139256		50.6	0.0138812	0.0164242	0.0204538	0.0226554	0.0271403	0.0313727			50.6	0.0253441	0.0497105	0.0845919	0.118412	0.13263	0.131073		50.6	0.0145227	0.0160023	0.0212034	0.0212264	0.0241718	0.0270698			50.6	0.0150269	0.0442379	0.0720309	0.110284	0.103878	0.0968182		50.6	0.00611527	0.0145066	0.00603916
				50.8	0.0318416	0.0556857	0.0944832	0.115555	0.118914	0.1386		50.8	0.0146607	0.0163106	0.0213519	0.0227642	0.0274579	0.0309669			50.8	0.0254827	0.0501167	0.0857955	0.118263	0.132521	0.131374		50.8	0.0152556	0.0155905	0.0215642	0.0206293	0.0239027	0.0283168			50.8	0.0144407	0.0450925	0.0720224	0.109377	0.105553	0.0959146		50.8	0.00588441	0.0119824	0.0068274
				51	0.0328394	0.0551772	0.0946071	0.116111	0.11878	0.140053		51	0.0149269	0.0155242	0.0205856	0.0225684	0.0273658	0.0318784			51	0.0255594	0.051229	0.0860001	0.117974	0.132318	0.130999		51	0.014675	0.0154197	0.021876	0.0194751	0.0239681	0.030166			51	0.0142687	0.0445604	0.071965	0.109563	0.105466	0.0957257		51	0.00563956	0.0114831	0.00714648
				51.2	0.0336012	0.0555041	0.0948558	0.116344	0.119069	0.139133		51.2	0.0144032	0.0153174	0.0197442	0.0235341	0.0279053	0.0316995			51.2	0.0261425	0.0509445	0.0847354	0.117269	0.133694	0.130645		51.2	0.0146725	0.0152851	0.0217974	0.0203435	0.024835	0.0297686			51.2	0.014025	0.0432084	0.0716432	0.109032	0.106167	0.0959819		51.2	0.00512081	0.0112625	0.00655644
				51.4	0.0340405	0.0554032	0.0938468	0.117479	0.118388	0.138569		51.4	0.0139763	0.0148848	0.0203278	0.0231442	0.0260341	0.0306808			51.4	0.0263233	0.0516694	0.0851188	0.117197	0.134338	0.130428		51.4	0.014262	0.0159431	0.0223966	0.0195687	0.0238436	0.0290464			51.4	0.0138627	0.0431349	0.071838	0.108194	0.106773	0.0956752		51.4	0.00439306	0.0108754	0.00579239
				51.6	0.0333884	0.056077	0.0937094	0.117312	0.119089	0.138967		51.6	0.0136062	0.015064	0.0205182	0.0228469	0.0258622	0.0306489			51.6	0.0260256	0.0517452	0.0853774	0.118643	0.135111	0.130569		51.6	0.0136918	0.0161738	0.0216812	0.0202794	0.0236165	0.0290637			51.6	0.0141692	0.0428212	0.0723863	0.108554	0.107509	0.095631		51.6	0.00468828	0.0102724	0.00613932
				51.8	0.0332065	0.0556649	0.0933367	0.117865	0.118857	0.139491		51.8	0.0128547	0.0150004	0.0201708	0.0225492	0.0250196	0.0294491			51.8	0.0265217	0.0512082	0.0862065	0.119354	0.13598	0.129459		51.8	0.0127501	0.0169192	0.021762	0.0207347	0.0236729	0.0288918			51.8	0.0138609	0.0430944	0.0721547	0.109781	0.107916	0.0962575		51.8	0.00398409	0.00815721	0.00702874
				52	0.0323773	0.0559457	0.0919374	0.117369	0.11866	0.140389		52	0.0124321	0.0147419	0.0195469	0.0215616	0.0243109	0.0283429			52	0.0269285	0.0500651	0.0866665	0.120199	0.135607	0.129971		52	0.0124629	0.0168819	0.0214475	0.0209853	0.0228895	0.0288984			52	0.0139983	0.0417629	0.0727987	0.110212	0.108141	0.0965498		52	0.00455538	0.00833793	0.00754804
				52.2	0.0308968	0.0559794	0.0908597	0.117257	0.119491	0.140463		52.2	0.0129089	0.0154159	0.0194031	0.0217026	0.0234302	0.0275488			52.2	0.0267311	0.0490593	0.0863556	0.120797	0.135993	0.129391		52.2	0.0128715	0.017022	0.0204527	0.021689	0.022591	0.0302981			52.2	0.013732	0.0424703	0.0724556	0.109782	0.108333	0.0968257		52.2	0.00395944	0.00743574	0.00828825
				52.4	0.0312241	0.056016	0.0906426	0.115667	0.119495	0.14001		52.4	0.0116577	0.0145985	0.0181868	0.0214874	0.0228606	0.0262199			52.4	0.026702	0.0478705	0.0872366	0.120913	0.136402	0.129546		52.4	0.0120732	0.0169376	0.0202353	0.0212094	0.0232096	0.031245			52.4	0.015465	0.0427804	0.0725621	0.110496	0.108619	0.0963504		52.4	0.00441551	0.00832335	0.00799893
				52.6	0.0311375	0.0570197	0.0903884	0.11567	0.119916	0.139742		52.6	0.0110054	0.0149741	0.0186539	0.0215106	0.0216647	0.0265207			52.6	0.0270315	0.0477631	0.0875645	0.120846	0.135546	0.129572		52.6	0.0121858	0.0173939	0.0196252	0.0215146	0.0241877	0.0319559			52.6	0.0160085	0.043915	0.0724921	0.108982	0.107515	0.0966429		52.6	0.00450174	0.00833334	0.00843075
				52.8	0.0303122	0.0569448	0.0915829	0.114996	0.119442	0.13962		52.8	0.0102119	0.0152774	0.0186948	0.0212813	0.0216707	0.027429			52.8	0.0256102	0.0482333	0.0869151	0.120588	0.135303	0.128234		52.8	0.0125577	0.0169146	0.0199694	0.0215639	0.0254535	0.0315195			52.8	0.0157794	0.043566	0.0728405	0.10942	0.10639	0.0953786		52.8	0.00439329	0.0090148	0.00867027
				53	0.0305347	0.058353	0.0921551	0.114425	0.119792	0.139805		53	0.0104658	0.0148159	0.0181472	0.0208955	0.0212902	0.0278399			53	0.0245143	0.0483731	0.0866542	0.120816	0.135642	0.128136		53	0.0124746	0.0164064	0.0197434	0.0216196	0.0260326	0.0306165			53	0.0168743	0.0436913	0.071961	0.108995	0.105504	0.0950697		53	0.00421276	0.010036	0.00947411
				53.2	0.030324	0.0588883	0.0920041	0.113368	0.118969	0.140117		53.2	0.011285	0.0145075	0.0185451	0.0217597	0.0206091	0.0282922			53.2	0.0235686	0.0489276	0.086567	0.121245	0.135645	0.128508		53.2	0.0129768	0.0164132	0.0203185	0.0211097	0.0272472	0.0299506			53.2	0.0174837	0.0425838	0.0708893	0.109338	0.105151	0.0952294		53.2	0.00453097	0.0105059	0.00848569
				53.4	0.0298302	0.0599666	0.0915146	0.113716	0.119801	0.139008		53.4	0.0111804	0.0155516	0.0181559	0.0220874	0.0210153	0.0294167			53.4	0.022875	0.0490649	0.0867688	0.12125	0.134954	0.127294		53.4	0.0131391	0.0157058	0.0210384	0.0207053	0.0280411	0.0298523			53.4	0.0178176	0.0425354	0.0702242	0.109664	0.103816	0.0949252		53.4	0.00301904	0.0112138	0.00780264
				53.6	0.0294126	0.060296	0.0915747	0.113508	0.120078	0.139689		53.6	0.0113288	0.0155137	0.0187969	0.0224101	0.0207246	0.0299056			53.6	0.0223492	0.0482168	0.0856834	0.120431	0.13317	0.127241		53.6	0.0133874	0.0156708	0.0203574	0.019597	0.0287447	0.0295107			53.6	0.0185987	0.0427623	0.0705295	0.109152	0.102371	0.0942655		53.6	0.00223939	0.0110923	0.00837346
				53.8	0.0302789	0.0602471	0.0910777	0.112758	0.119951	0.140212		53.8	0.0114975	0.0152069	0.019404	0.0208512	0.020422	0.0310608			53.8	0.0225422	0.0481259	0.0847294	0.119982	0.133435	0.127076		53.8	0.0127995	0.0153508	0.0196942	0.0187795	0.028538	0.030058			53.8	0.0186439	0.042637	0.0704644	0.110341	0.102839	0.0936051		53.8	0.00220564	0.0111957	0.00792747
				54	0.0303207	0.0607094	0.0908172	0.112813	0.119674	0.140007		54	0.0113642	0.0154652	0.0193769	0.0215688	0.0197212	0.0313591			54	0.0216115	0.0487518	0.0840595	0.120722	0.132721	0.127315		54	0.0139181	0.0161123	0.0194753	0.0189372	0.0297228	0.0292554			54	0.0189239	0.0429141	0.0704557	0.111432	0.101252	0.0947024		54	0.00167048	0.0123076	0.00802657
				54.2	0.0309269	0.0602459	0.0912129	0.113789	0.120075	0.13923		54.2	0.0107294	0.0155392	0.019721	0.0211587	0.0192033	0.0310221			54.2	0.02228	0.0484468	0.0835764	0.121499	0.131902	0.126819		54.2	0.014091	0.0166387	0.0187979	0.0183572	0.0298728	0.0295669			54.2	0.0188866	0.043767	0.0714814	0.112031	0.101508	0.0949461		54.2	0.0024884	0.0133168	0.00811813
				54.4	0.0306495	0.0593447	0.0918118	0.113735	0.120023	0.139685		54.4	0.0111269	0.0151697	0.0204135	0.0211506	0.0189235	0.0316474			54.4	0.0234063	0.0487876	0.0836567	0.122973	0.131426	0.126801		54.4	0.0144309	0.0170498	0.0193014	0.0190616	0.029847	0.0296578			54.4	0.0187949	0.0438734	0.0718351	0.112574	0.102268	0.0951445		54.4	0.0026044	0.0132601	0.00818423
				54.6	0.0307823	0.0593926	0.091273	0.113865	0.120662	0.14081		54.6	0.0106996	0.015883	0.0200346	0.0222519	0.0198301	0.0318232			54.6	0.0238394	0.049257	0.0842005	0.123145	0.131387	0.127266		54.6	0.0138263	0.0153596	0.0186594	0.0185691	0.0296538	0.0298804			54.6	0.0183256	0.0450782	0.073663	0.112618	0.101548	0.0956128		54.6	0.00191603	0.0132742	0.00810024
				54.8	0.0310411	0.0599639	0.091176	0.114322	0.120162	0.140996		54.8	0.0106036	0.0156388	0.0199654	0.0222929	0.0198958	0.0321924			54.8	0.0228014	0.0493587	0.0855058	0.123957	0.13103	0.126472		54.8	0.014129	0.0147593	0.0186466	0.0193585	0.0287995	0.0296019			54.8	0.0181092	0.0461036	0.0744736	0.113021	0.101296	0.0957284		54.8	0.00208523	0.0127328	0.00886494
				55	0.0315481	0.0585987	0.0909875	0.115245	0.119689	0.141143		55	0.0105218	0.0148829	0.0191096	0.0234217	0.0201906	0.032974			55	0.0227453	0.0486355	0.0858807	0.123579	0.130791	0.126358		55	0.0142741	0.0154124	0.0181269	0.019534	0.0285518	0.0292408			55	0.0186981	0.0444078	0.0741856	0.113693	0.101708	0.0968797		55	0.00168531	0.0139734	0.00966783
				55.2	0.0316057	0.0572119	0.0918208	0.116233	0.119612	0.140737		55.2	0.0102286	0.0148278	0.018247	0.0232402	0.0204634	0.033137			55.2	0.0227417	0.0486298	0.086168	0.123251	0.131471	0.127414		55.2	0.0148361	0.0156249	0.0179661	0.0198334	0.0282645	0.0290428			55.2	0.0192402	0.044335	0.0745858	0.114166	0.104274	0.0961417		55.2	0.0014526	0.0133491	0.00875921
				55.4	0.0314386	0.0557101	0.0924264	0.117009	0.119119	0.140696		55.4	0.0106634	0.0164057	0.0182673	0.0236603	0.0209305	0.0320998			55.4	0.0224431	0.0488803	0.0866168	0.123408	0.13203	0.127853		55.4	0.0150269	0.0151401	0.0184353	0.0188945	0.027244	0.0286502			55.4	0.019257	0.0445098	0.0757206	0.114574	0.1056	0.0962401		55.4	0.0013408	0.0122546	0.00873818
				55.6	0.0304647	0.0553867	0.0921393	0.117058	0.118897	0.140808		55.6	0.0108401	0.0166846	0.0178434	0.0241998	0.0217581	0.0314804			55.6	0.0236734	0.04921	0.0871328	0.123285	0.132593	0.12829		55.6	0.0145205	0.0149908	0.0185905	0.0198704	0.0268403	0.0293066			55.6	0.0182049	0.0443276	0.0766948	0.116175	0.106727	0.0965716		55.6	0.00218689	0.011053	0.00812944
				55.8	0.0296981	0.0544517	0.092218	0.117326	0.118298	0.141589		55.8	0.0105703	0.0172521	0.0175005	0.0245171	0.0222273	0.0296639			55.8	0.0240414	0.0487355	0.0868362	0.122501	0.133367	0.128636		55.8	0.0145787	0.0155481	0.0190806	0.019506	0.0270293	0.0298023			55.8	0.016511	0.0447469	0.0763268	0.115835	0.108018	0.0969442		55.8	0.00248927	0.00936046	0.00934277
				56	0.0291531	0.0546475	0.092476	0.116983	0.117768	0.142395		56	0.0113556	0.0167908	0.0169175	0.0243441	0.0219485	0.0291611			56	0.0245199	0.0476609	0.0872139	0.12128	0.133769	0.128972		56	0.0141917	0.0160833	0.0190705	0.019186	0.0265876	0.0313204			56	0.0163055	0.0433888	0.0756327	0.114262	0.109467	0.0970183		56	0.00219042	0.00873372	0.00808213
				56.2	0.0292428	0.0554991	0.0935346	0.116963	0.118844	0.141883		56.2	0.0120298	0.0170367	0.0174937	0.0249017	0.0221036	0.0290688			56.2	0.0248405	0.0474213	0.0868677	0.120249	0.134679	0.129186		56.2	0.0129823	0.0161719	0.0199598	0.0199657	0.0265558	0.0313122			56.2	0.0152508	0.044152	0.0747135	0.113712	0.109656	0.0982161		56.2	0.00247191	0.00869098	0.00756118
				56.4	0.0302429	0.0557395	0.0941868	0.116611	0.119536	0.14255		56.4	0.0114049	0.017283	0.017011	0.0243539	0.0220891	0.0290512			56.4	0.0248848	0.0475506	0.0876102	0.11941	0.135878	0.130081		56.4	0.0131938	0.0175349	0.0212858	0.0187016	0.0262158	0.0302604			56.4	0.0162945	0.0436686	0.0739242	0.1133	0.109892	0.0982729		56.4	0.00321907	0.00881588	0.00751905
				56.6	0.0293231	0.0564637	0.0951896	0.116687	0.12039	0.142396		56.6	0.0114015	0.0176357	0.0178844	0.0235091	0.0213	0.0284313			56.6	0.0255814	0.0486193	0.0873004	0.118621	0.136111	0.130422		56.6	0.0137036	0.0180413	0.0212732	0.0174454	0.0257603	0.0299297			56.6	0.0160161	0.0439203	0.0743285	0.111844	0.108984	0.0991417		56.6	0.00356912	0.00861143	0.00810953
				56.8	0.0287245	0.0561258	0.0965049	0.116666	0.120498	0.142755		56.8	0.0122948	0.0170983	0.0178014	0.0231048	0.0227527	0.0286364			56.8	0.0249958	0.0489971	0.0867583	0.118076	0.136458	0.130102		56.8	0.013624	0.0185029	0.0215979	0.0169061	0.0262958	0.0292498			56.8	0.0154541	0.044064	0.0733345	0.112712	0.109579	0.0977225		56.8	0.00311083	0.00858382	0.00755713
				57	0.0290806	0.0566204	0.0968916	0.117191	0.121325	0.142625		57	0.0131347	0.0167066	0.0176927	0.0224027	0.0224005	0.0286767			57	0.0258146	0.0492163	0.0868526	0.118191	0.136644	0.130922		57	0.01297	0.0189026	0.020431	0.0156452	0.026855	0.0283952			57	0.0152917	0.0436007	0.0724182	0.112257	0.108333	0.0980255		57	0.00271301	0.00797061	0.00693507
				57.2	0.029536	0.0568708	0.0964635	0.117743	0.122279	0.1409		57.2	0.0134562	0.0163324	0.0183394	0.022886	0.0216431	0.0284548			57.2	0.0260078	0.0492624	0.0869917	0.11842	0.137355	0.130544		57.2	0.0131739	0.0188462	0.0205571	0.0157154	0.0276965	0.0280711			57.2	0.0149049	0.0434903	0.0712463	0.110417	0.10763	0.0977954		57.2	0.00189215	0.00700928	0.00610229
				57.4	0.0297717	0.0574363	0.0963214	0.117217	0.123334	0.140015		57.4	0.0123987	0.0158944	0.0177328	0.0218805	0.0218291	0.0282134			57.4	0.0271137	0.0494295	0.0861686	0.118887	0.13721	0.13011		57.4	0.0136832	0.0178213	0.0203526	0.0158341	0.0272829	0.0280811			57.4	0.0132005	0.0442627	0.0706551	0.109503	0.106684	0.0972514		57.4	0.00260083	0.00722419	0.0073
				57.6	0.029636	0.0569149	0.0970181	0.116266	0.123785	0.140877		57.6	0.0123036	0.0158557	0.0182491	0.0206959	0.0205477	0.0274747			57.6	0.0283862	0.0493638	0.0864976	0.119272	0.136458	0.130027		57.6	0.0142397	0.0169783	0.0193535	0.0171095	0.0267026	0.0273838			57.6	0.0134017	0.0453483	0.0708697	0.11018	0.106164	0.0965152		57.6	0.00323857	0.00764576	0.00715109
				57.8	0.0311907	0.0580949	0.0971011	0.115423	0.123333	0.140739		57.8	0.0119681	0.0153276	0.0184125	0.0202161	0.0206374	0.0271626			57.8	0.0292774	0.0490008	0.0862675	0.118783	0.136736	0.13021		57.8	0.0142236	0.0168766	0.0188898	0.0183023	0.0267884	0.0279387			57.8	0.0138908	0.0455147	0.0705981	0.110794	0.106395	0.0979227		57.8	0.00266674	0.00734679	0.00706261
				58	0.0314964	0.0583933	0.0968176	0.115164	0.122976	0.140648		58	0.0113533	0.0158241	0.0187854	0.0206208	0.0198457	0.0273009			58	0.0297383	0.0489977	0.0864984	0.119283	0.13665	0.130434		58	0.0151157	0.0168606	0.0182504	0.0182544	0.0273579	0.0281561			58	0.013265	0.04769	0.0711534	0.111097	0.105456	0.0985528		58	0.00263072	0.00870137	0.00785373
				58.2	0.0318046	0.0593242	0.0967125	0.114603	0.123293	0.141245		58.2	0.0116498	0.0155762	0.0190512	0.0190484	0.0205421	0.0267548			58.2	0.0307769	0.0487406	0.0865846	0.119903	0.136429	0.130936		58.2	0.0147481	0.015577	0.0178647	0.0184906	0.0267852	0.0290052			58.2	0.0130888	0.0482545	0.0714104	0.110588	0.104275	0.0980591		58.2	0.00244183	0.00859429	0.0092351
				58.4	0.0315656	0.060045	0.0962826	0.113958	0.123035	0.141416		58.4	0.0121821	0.0160008	0.0184446	0.0193982	0.020265	0.0271139			58.4	0.0312515	0.050134	0.0878923	0.121514	0.136124	0.131541		58.4	0.0142983	0.0143969	0.0183511	0.0199414	0.025708	0.0283514			58.4	0.0130763	0.0487677	0.0725146	0.110413	0.103091	0.0980166		58.4	0.00085754	0.00939882	0.00917451
				58.6	0.031822	0.0604843	0.0968679	0.113864	0.122976	0.141187		58.6	0.0113254	0.0159719	0.0176206	0.0191703	0.0208198	0.0266354			58.6	0.0311868	0.0513544	0.0878219	0.121522	0.135812	0.131468		58.6	0.0132738	0.0135897	0.017996	0.0211162	0.0257564	0.02787			58.6	0.0144525	0.0495282	0.0732409	0.110386	0.10162	0.0981386		58.6	0.00169068	0.00900415	0.00808345
				58.8	0.0320738	0.0601369	0.096077	0.11494	0.121847	0.140606		58.8	0.0116773	0.0157504	0.0173582	0.0199789	0.0206046	0.0275508			58.8	0.0305187	0.0513522	0.0883	0.121067	0.134933	0.130908		58.8	0.0137311	0.0127837	0.0181913	0.0222103	0.025362	0.0275739			58.8	0.015892	0.0490669	0.0729245	0.111522	0.102467	0.0982134		58.8	0.00290731	0.00929692	0.00845009
				59	0.0322366	0.0592855	0.0960358	0.11572	0.121512	0.140881		59	0.0120522	0.0154201	0.0160321	0.0201892	0.0204883	0.027781			59	0.0301234	0.051306	0.0882208	0.119719	0.134849	0.130919		59	0.0139404	0.0117703	0.0178059	0.0221595	0.0256135	0.0284497			59	0.0167516	0.0473554	0.0738177	0.111122	0.103103	0.0990948		59	0.00174259	0.0101549	0.00962203
				59.2	0.0324972	0.0594753	0.0965459	0.116202	0.120837	0.141827		59.2	0.0118931	0.0158702	0.0157908	0.0201724	0.020918	0.0283018			59.2	0.0301912	0.0519949	0.0878264	0.119133	0.134841	0.131328		59.2	0.0146856	0.0102526	0.0189297	0.0224904	0.0257306	0.0289035			59.2	0.0175394	0.0484521	0.0743439	0.111208	0.10386	0.0991264		59.2	0.00018205	0.00935687	0.0100543
				59.4	0.0325918	0.0596167	0.096656	0.116648	0.119805	0.142084		59.4	0.0113169	0.0164638	0.0156967	0.0211304	0.0203102	0.0273899			59.4	0.0301065	0.0519883	0.0875799	0.118792	0.135275	0.13114		59.4	0.0145559	0.00900537	0.0190576	0.0231092	0.0255647	0.0289072			59.4	0.0180351	0.0487142	0.0747827	0.111365	0.103648	0.099166		59.4	0.00034368	0.00850948	0.0103445
				59.6	0.032405	0.0605781	0.0962128	0.1159	0.117968	0.142536		59.6	0.0112354	0.0156805	0.0150247	0.0219964	0.0200419	0.0266082			59.6	0.0293092	0.0519346	0.0875713	0.119198	0.135096	0.130589		59.6	0.0134798	0.0090264	0.0193178	0.0232563	0.0264192	0.0282261			59.6	0.0173319	0.0476328	0.0756551	0.111136	0.105183	0.100083		59.6	-0.00073564	0.00861025	0.0105864
				59.8	0.0320966	0.0616857	0.0972485	0.116101	0.117805	0.142907		59.8	0.0119951	0.0165918	0.015648	0.0219708	0.0205634	0.0265724			59.8	0.0282448	0.0511607	0.0869526	0.119849	0.135114	0.130347		59.8	0.0135957	0.00901651	0.020034	0.0227962	0.0260976	0.0282802			59.8	0.0180137	0.0466597	0.0751351	0.110976	0.106025	0.10052		59.8	-0.00115046	0.00843814	0.0112161
				60	0.0323006	0.0620936	0.0963949	0.117124	0.118336	0.142968		60	0.0127171	0.016246	0.0159484	0.0225021	0.0192106	0.0271363			60	0.0283709	0.0509776	0.0868605	0.120285	0.135852	0.13078		60	0.0129153	0.00972016	0.0205387	0.0220306	0.0258953	0.0288539			60	0.0187881	0.045922	0.0742207	0.110438	0.106631	0.100306		60	-0.00152647	0.00867321	0.0101683
				60.2	0.0324193	0.0624831	0.0958328	0.117723	0.119431	0.143528		60.2	0.0128719	0.0161116	0.017182	0.0218788	0.0190295	0.0275161			60.2	0.0273498	0.0506783	0.0870808	0.120559	0.135228	0.130525		60.2	0.0126058	0.0105469	0.0218915	0.0218103	0.025902	0.0270629			60.2	0.0185159	0.0460916	0.0752789	0.111531	0.107143	0.101337		60.2	-0.00041616	0.00930072	0.0102661
				60.4	0.0316134	0.0610054	0.0953718	0.118354	0.118734	0.143915		60.4	0.0138805	0.0166556	0.0171709	0.0212977	0.0190294	0.0273001			60.4	0.0264458	0.0501405	0.086857	0.120585	0.134399	0.130267		60.4	0.0125932	0.012267	0.0220669	0.0200899	0.0255666	0.0271015			60.4	0.0188251	0.0448596	0.0754579	0.111863	0.108014	0.101438		60.4	-0.00062841	0.00964644	0.0102478
				60.6	0.0304515	0.0607296	0.0957454	0.118839	0.119165	0.144187		60.6	0.0140169	0.0162339	0.0183918	0.0208192	0.0183271	0.0269735			60.6	0.0268669	0.0498883	0.0861336	0.120861	0.133808	0.128568		60.6	0.0125332	0.0129718	0.0209937	0.0189319	0.0250611	0.0277011			60.6	0.0184337	0.0451072	0.0762892	0.113037	0.108137	0.102186		60.6	-0.00072441	0.0105469	0.00979217
				60.8	0.0294807	0.0604762	0.0951702	0.119516	0.118969	0.144837		60.8	0.0146593	0.0162995	0.0185079	0.0205727	0.0191318	0.0266318			60.8	0.0265521	0.049256	0.0864267	0.122049	0.133478	0.127901		60.8	0.0122996	0.01416	0.02021	0.0188887	0.0247943	0.0269632			60.8	0.0186022	0.0442998	0.0760546	0.11347	0.108959	0.102143		60.8	-0.00119574	0.0107637	0.00884858
				61	0.0304068	0.0596623	0.0943558	0.119716	0.119597	0.14467		61	0.0139929	0.0154285	0.0189682	0.0208368	0.0190188	0.0267722			61	0.0273869	0.0492995	0.0866141	0.122676	0.133493	0.127299		61	0.0125433	0.014707	0.0196047	0.0193708	0.0239182	0.0258368			61	0.0188609	0.0434526	0.0759383	0.112965	0.109263	0.101892		61	-8.06E-02	0.0110371	0.00876628
				61.2	0.0301767	0.0599027	0.0933246	0.118973	0.120399	0.143827		61.2	0.0135251	0.0149086	0.0196247	0.0216221	0.019124	0.0265627			61.2	0.0265554	0.0489321	0.086124	0.1234	0.134403	0.126736		61.2	0.0133525	0.0154235	0.0206566	0.0199636	0.0233251	0.02588			61.2	0.0187227	0.042115	0.0749277	0.112406	0.109774	0.101679		61.2	0.00098744	0.0102723	0.00892035
				61.4	0.029526	0.0598718	0.0935943	0.118287	0.120806	0.144127		61.4	0.0127084	0.0148237	0.0194673	0.0203614	0.0195619	0.0261684			61.4	0.0272738	0.0486248	0.0860618	0.124879	0.134625	0.12655		61.4	0.0143049	0.0151869	0.0195386	0.0191247	0.0234119	0.0265199			61.4	0.0177949	0.0419958	0.0747927	0.113792	0.109663	0.100205		61.4	0.00188703	0.0100952	0.00863979
				61.6	0.0295117	0.0599812	0.0936093	0.117961	0.122076	0.144422		61.6	0.0130522	0.0153066	0.0197692	0.0199201	0.0199438	0.0260363			61.6	0.0270188	0.0484382	0.0867645	0.124858	0.134222	0.126183		61.6	0.0138903	0.0150479	0.0198419	0.0199897	0.0230073	0.0270537			61.6	0.0182667	0.0419428	0.0746856	0.115227	0.110112	0.0997436		61.6	0.00211167	0.00962233	0.00733297
				61.8	0.0311035	0.0607628	0.0926447	0.117124	0.122231	0.144671		61.8	0.0135039	0.0144685	0.0205106	0.0196515	0.0212265	0.0251568			61.8	0.0264755	0.0485756	0.085636	0.12445	0.134598	0.126395		61.8	0.0138669	0.0160287	0.0200305	0.0191637	0.0229121	0.0270676			61.8	0.0180105	0.0422739	0.0738875	0.115803	0.110466	0.100106		61.8	0.00136253	0.00929928	0.00880159
				62	0.0308563	0.0608426	0.092565	0.116075	0.122758	0.144626		62	0.0131833	0.0149724	0.0209579	0.0198971	0.0212727	0.025218			62	0.0265558	0.0492307	0.086094	0.125637	0.13451	0.126481		62	0.0136437	0.0157481	0.0195083	0.0186381	0.0228981	0.0271608			62	0.0176741	0.0429351	0.0742425	0.116706	0.109647	0.100411		62	0.00140802	0.00918149	0.00892744
				62.2	0.0311552	0.0616443	0.0918565	0.115932	0.124111	0.145807		62.2	0.0135801	0.0146946	0.0204317	0.0189789	0.0221978	0.0253593			62.2	0.0272867	0.0503062	0.085995	0.126492	0.134344	0.127214		62.2	0.0130337	0.0157783	0.0195573	0.0188517	0.0231021	0.0275687			62.2	0.0166004	0.0426562	0.0738233	0.116148	0.108706	0.100298		62.2	0.00062962	0.00861149	0.00872065
				62.4	0.0315349	0.0622766	0.091086	0.115667	0.124097	0.145714		62.4	0.0128863	0.0141038	0.0195997	0.0185023	0.0213837	0.0254172			62.4	0.0272664	0.0514517	0.0864541	0.126935	0.135044	0.127699		62.4	0.0125363	0.0158247	0.0204587	0.0182761	0.0230595	0.0271856			62.4	0.0164558	0.0429611	0.0748247	0.116462	0.108298	0.100266		62.4	0.00138121	0.00875722	0.0084398
				62.6	0.0322091	0.0621431	0.0916104	0.115757	0.123296	0.146666		62.6	0.013074	0.01385	0.0191828	0.0179528	0.0220977	0.0242968			62.6	0.0275955	0.0520153	0.0857364	0.124761	0.135294	0.128246		62.6	0.0118914	0.0149493	0.0201396	0.0184577	0.0239564	0.0269317			62.6	0.0168035	0.0437316	0.0748431	0.115745	0.108578	0.100855		62.6	0.00330919	0.00873708	0.00769172
				62.8	0.033583	0.0623945	0.0909126	0.116165	0.122815	0.147146		62.8	0.0134211	0.0136088	0.0184057	0.0181108	0.0229087	0.0249377			62.8	0.0282455	0.0505138	0.0851369	0.124369	0.135703	0.128245		62.8	0.0121452	0.0138596	0.0200445	0.0178884	0.0247454	0.0271827			62.8	0.016938	0.0428308	0.0758494	0.115664	0.109788	0.10185		62.8	0.00264207	0.00999676	0.00795015
				63	0.0342694	0.0630484	0.0915785	0.115544	0.123167	0.148456		63	0.0135225	0.0127005	0.0179315	0.0172345	0.0229842	0.0245656			63	0.0279577	0.050784	0.0854581	0.124077	0.136195	0.128579		63	0.0118539	0.0134124	0.0191503	0.0181349	0.0252194	0.0264591			63	0.0168094	0.0442509	0.0773609	0.115542	0.109242	0.102554		63	0.00164162	0.00917036	0.00902404
				63.2	0.0347328	0.0632507	0.0921723	0.114519	0.122308	0.147991		63.2	0.0124705	0.0124742	0.0178499	0.0170848	0.0233432	0.025413			63.2	0.0284565	0.0513217	0.0851877	0.123102	0.136843	0.129798		63.2	0.0120203	0.0124189	0.0186906	0.0181471	0.0256529	0.0258045			63.2	0.0167207	0.0456954	0.0774499	0.115874	0.109422	0.101622		63.2	0.00116175	0.00850603	0.0094
				63.4	0.0353201	0.0634691	0.0925672	0.114563	0.121368	0.146793		63.4	0.0114573	0.0131949	0.017161	0.0164715	0.023137	0.0255543			63.4	0.0286387	0.0511997	0.084889	0.122464	0.136687	0.130907		63.4	0.0121731	0.0119765	0.0173932	0.0177215	0.0261384	0.0257689			63.4	0.016839	0.0467352	0.0779494	0.116024	0.109388	0.101399		63.4	0.00134187	0.00830562	0.00931073
				63.6	0.0353021	0.0640593	0.0945219	0.114116	0.121149	0.145583		63.6	0.0116586	0.0136148	0.0166481	0.0171919	0.0235853	0.0256296			63.6	0.0284588	0.0509065	0.0850209	0.122154	0.136967	0.131928		63.6	0.011648	0.0112922	0.017299	0.0165354	0.0264903	0.025389			63.6	0.0160589	0.0459184	0.0794372	0.115069	0.110508	0.101923		63.6	0.00076674	0.0092018	0.00901167
				63.8	0.0349415	0.0645593	0.0956504	0.11623	0.121781	0.144867		63.8	0.011969	0.0136995	0.0167701	0.0171577	0.0226398	0.0262286			63.8	0.0295921	0.0512459	0.0851523	0.121118	0.136884	0.132756		63.8	0.0114605	0.0107833	0.0172969	0.0171501	0.026638	0.0263975			63.8	0.016797	0.0454039	0.0787517	0.116053	0.110449	0.101704		63.8	0.00059735	0.00933104	0.00860839
				64	0.0355303	0.0623515	0.0953338	0.116494	0.121455	0.14464		64	0.0116754	0.0135704	0.0165941	0.0172534	0.0213047	0.0264033			64	0.029715	0.0522713	0.0854598	0.120972	0.136578	0.133209		64	0.0111199	0.0107572	0.0179254	0.0165448	0.0267398	0.0278496			64	0.0162376	0.0457936	0.0776789	0.115614	0.110405	0.102228		64	0.00013511	0.00969108	0.00876499
				64.2	0.0354326	0.0614236	0.0956789	0.116612	0.121425	0.143698		64.2	0.0115695	0.0133045	0.0169889	0.0161251	0.0210733	0.0260454			64.2	0.0289046	0.0520219	0.0853055	0.120239	0.135863	0.131908		64.2	0.0109457	0.0109468	0.0177237	0.0162886	0.0261725	0.0279638			64.2	0.0160334	0.0449787	0.0782748	0.11565	0.11018	0.103217		64.2	0.00041361	0.0108853	0.0089989
				64.4	0.0351096	0.060244	0.0973976	0.116938	0.121099	0.143078		64.4	0.0110318	0.0143828	0.0173859	0.0156671	0.0203272	0.0260129			64.4	0.0292041	0.0524084	0.084376	0.119246	0.134918	0.131884		64.4	0.0102128	0.0111991	0.0183711	0.0165215	0.0258368	0.0284963			64.4	0.0163522	0.0439039	0.0771077	0.115178	0.110522	0.102804		64.4	-0.00051516	0.0122561	0.00958824
				64.6	0.0349297	0.0599248	0.0987571	0.116438	0.121041	0.142774		64.6	0.0100841	0.0144268	0.0183031	0.0167267	0.0189748	0.025478			64.6	0.0297034	0.0529317	0.0848613	0.119273	0.134536	0.130078		64.6	0.0105168	0.0106976	0.0170712	0.0164058	0.0246	0.0287332			64.6	0.0170093	0.0434787	0.0764648	0.115203	0.109655	0.103059		64.6	-0.00057001	0.0124748	0.0086258
				64.8	0.0339191	0.0599093	0.0984404	0.116112	0.120607	0.141739		64.8	0.0101198	0.014208	0.0187005	0.0168267	0.019118	0.0250003			64.8	0.029918	0.0529666	0.0857481	0.120473	0.134725	0.130115		64.8	0.0112975	0.0114429	0.0163314	0.0164489	0.0235166	0.0281183			64.8	0.0175607	0.0430089	0.0756533	0.114143	0.109156	0.104267		64.8	8.03E-02	0.0112502	0.00842449
				65	0.0340392	0.0591777	0.100303	0.11658	0.121296	0.141618		65	0.010895	0.0137769	0.0192428	0.017866	0.0185885	0.0256193			65	0.0298102	0.0541769	0.0857828	0.120627	0.134749	0.129271		65	0.0118424	0.0118952	0.0161443	0.0164186	0.0234384	0.0275677			65	0.0184537	0.0434337	0.0746966	0.114263	0.109123	0.103895		65	-8.44e-06	0.0108067	0.00873778
				65.2	0.032579	0.0596232	0.100368	0.11704	0.122104	0.140449		65.2	0.0114936	0.0142147	0.0189955	0.018571	0.0193852	0.0260391			65.2	0.0291346	0.0541712	0.0856919	0.121127	0.134922	0.129104		65.2	0.0132511	0.0111905	0.0161758	0.0158188	0.02255	0.0277729			65.2	0.0183595	0.0424849	0.0734619	0.114326	0.107989	0.102864		65.2	-0.00115546	0.00939688	0.00922498
				65.4	0.0318341	0.0594096	0.100647	0.117158	0.123354	0.140876		65.4	0.0118349	0.0152195	0.0188371	0.0190658	0.0196065	0.0257204			65.4	0.0289921	0.054283	0.0856216	0.122197	0.134366	0.129199		65.4	0.0138841	0.0110875	0.0155007	0.0155278	0.0218061	0.027967			65.4	0.0179904	0.0413844	0.0729266	0.115937	0.107687	0.101664		65.4	-0.00169824	0.00904242	0.00994246
				65.6	0.0320388	0.0599122	0.100399	0.117061	0.123283	0.140629		65.6	0.0127528	0.0159622	0.0195023	0.0188058	0.0193083	0.0264119			65.6	0.0285144	0.0536524	0.0846907	0.122689	0.133548	0.129345		65.6	0.0136025	0.0118943	0.0172217	0.015811	0.02185	0.0276765			65.6	0.0177372	0.0412873	0.0715235	0.116027	0.107125	0.102034		65.6	-0.00087586	0.0100498	0.0107849
				65.8	0.0320512	0.0601187	0.0998422	0.116762	0.122746	0.141186		65.8	0.0131474	0.0159997	0.0200837	0.0197345	0.0188283	0.0261998			65.8	0.0282976	0.0536029	0.08429	0.123733	0.133686	0.129103		65.8	0.0144974	0.0123769	0.0166471	0.0156093	0.020731	0.0274979			65.8	0.018034	0.041621	0.0705591	0.116	0.107345	0.102692		65.8	-0.00044754	0.0104966	0.0120115
				66	0.0303008	0.0597725	0.0991947	0.116532	0.122656	0.141772		66	0.0131008	0.0166982	0.0201533	0.0209775	0.0182449	0.0274535			66	0.028753	0.0528435	0.0839571	0.124404	0.134055	0.129409		66	0.0145797	0.0129238	0.0165932	0.0156842	0.0200686	0.0272976			66	0.01882	0.0410192	0.0708499	0.117446	0.107636	0.102399		66	0.00035483	0.00930928	0.0123623
				66.2	0.0294581	0.0602744	0.0979325	0.116911	0.122349	0.142535		66.2	0.0131147	0.0163909	0.0198399	0.0203879	0.0186187	0.0276186			66.2	0.0284903	0.0522746	0.0847469	0.125311	0.134759	0.129621		66.2	0.0141535	0.0132251	0.0170835	0.0157182	0.0200014	0.0269265			66.2	0.0173708	0.0416491	0.0705574	0.116232	0.107425	0.100967		66.2	0.00159194	0.00983505	0.0131241
				66.4	0.029905	0.0597804	0.0968356	0.116899	0.121517	0.143405		66.4	0.0132339	0.0161873	0.0194018	0.020404	0.0187356	0.0266945			66.4	0.0284924	0.0514416	0.0850249	0.125048	0.13548	0.12963		66.4	0.0138742	0.0126747	0.0174667	0.015016	0.0197148	0.025638			66.4	0.0184388	0.0420013	0.0707677	0.116232	0.107755	0.100651		66.4	0.00268991	0.0105817	0.0133898
				66.6	0.0299133	0.0595629	0.0963563	0.117223	0.120848	0.144596		66.6	0.0142911	0.0165044	0.0190767	0.0209465	0.0190879	0.0262674			66.6	0.0279822	0.0501847	0.0848237	0.124268	0.134774	0.129872		66.6	0.0136351	0.0114179	0.0164662	0.014833	0.0208432	0.0252011			66.6	0.0194604	0.0438866	0.0710589	0.115495	0.108198	0.100938		66.6	0.00375584	0.00995142	0.0125816
				66.8	0.0301689	0.0595896	0.0952947	0.1167	0.121675	0.144851		66.8	0.0144069	0.0161213	0.0180532	0.020959	0.0201527	0.0270439			66.8	0.0281414	0.0480561	0.0849445	0.125777	0.135375	0.129315		66.8	0.0132656	0.0118155	0.0171668	0.01482	0.0217805	0.024373			66.8	0.0186833	0.0449416	0.0723608	0.114714	0.109784	0.100339		66.8	0.00403208	0.00930985	0.0121614
				67	0.0309251	0.0602105	0.0945243	0.116546	0.122117	0.146061		67	0.0142619	0.0161604	0.0186539	0.0210666	0.0193865	0.0280653			67	0.0270687	0.0482262	0.0861017	0.124841	0.135427	0.129762		67	0.0128646	0.01061	0.0170327	0.015145	0.0223564	0.0235292			67	0.0182528	0.0477345	0.0720735	0.115144	0.10934	0.0987327		67	0.00430704	0.00882053	0.0128263
				67.2	0.0313547	0.0598809	0.0943318	0.117434	0.120965	0.145331		67.2	0.0143442	0.016209	0.0181976	0.0204586	0.0199169	0.0287395			67.2	0.0272369	0.0477147	0.0865737	0.123717	0.135727	0.130396		67.2	0.0128986	0.0101529	0.0167157	0.0149251	0.0225331	0.0238025			67.2	0.0171798	0.047756	0.0732119	0.115011	0.110643	0.0980461		67.2	0.0041218	0.00908696	0.0120887
				67.4	0.03198	0.0604116	0.0932603	0.11802	0.12055	0.144503		67.4	0.0137936	0.0168056	0.0170842	0.0195179	0.0207138	0.0287238			67.4	0.0274714	0.0472169	0.087306	0.12381	0.135226	0.130746		67.4	0.0121984	0.0108293	0.0168456	0.0146198	0.0242191	0.0246416			67.4	0.016992	0.0473486	0.0738842	0.114296	0.111352	0.0981498		67.4	0.00368308	0.0101321	0.0110743
				67.6	0.0328523	0.0609144	0.0939388	0.11864	0.120867	0.14432		67.6	0.012592	0.0158972	0.016102	0.0193643	0.0202808	0.0285407			67.6	0.0275111	0.0478138	0.0884651	0.123901	0.135493	0.130938		67.6	0.0114953	0.0109016	0.0169701	0.0152872	0.0250444	0.0254961			67.6	0.016495	0.0475187	0.0741893	0.113481	0.11252	0.0983652		67.6	0.00342546	0.00964087	0.00945296
				67.8	0.0335206	0.0607705	0.0926914	0.119632	0.120439	0.145058		67.8	0.013659	0.0150856	0.0158673	0.0182419	0.0198356	0.0284557			67.8	0.0279751	0.0486571	0.0885102	0.124121	0.135492	0.131106		67.8	0.0108396	0.0113743	0.0168977	0.0164958	0.0257073	0.0264444			67.8	0.0163343	0.0472991	0.0740946	0.114176	0.112691	0.0986893		67.8	0.00214051	0.00914141	0.00918501
				68	0.0347288	0.0596354	0.0918748	0.119052	0.120292	0.145296		68	0.0130483	0.015697	0.0159353	0.0169624	0.0200162	0.0271945			68	0.0269931	0.0480815	0.0888484	0.124408	0.135238	0.131584		68	0.0102329	0.0112765	0.0170237	0.0167805	0.0256512	0.0278437			68	0.0158308	0.0487193	0.0736777	0.113576	0.112627	0.0995705		68	0.00186089	0.00954977	0.00816697
				68.2	0.0346103	0.0596548	0.0926605	0.119365	0.119613	0.145514		68.2	0.0129049	0.0148672	0.0158491	0.0165332	0.0204314	0.0263434			68.2	0.0263171	0.0472279	0.088844	0.124029	0.135903	0.13155		68.2	0.0100928	0.0112732	0.0169094	0.0179738	0.0253466	0.0279482			68.2	0.0160984	0.0475587	0.0729473	0.112802	0.11268	0.0994139		68.2	0.00218434	0.00923346	0.00716152
				68.4	0.0353461	0.0597001	0.0936288	0.118966	0.119071	0.146522		68.4	0.0119694	0.0141603	0.0166818	0.0164783	0.0211117	0.0256311			68.4	0.0262786	0.0471912	0.089539	0.123404	0.136167	0.131714		68.4	0.00982118	0.0120801	0.0162595	0.0195046	0.0255391	0.0277755			68.4	0.0158972	0.0474438	0.0726668	0.11249	0.112598	0.0999022		68.4	0.00155663	0.0081939	0.00737674
				68.6	0.0354619	0.0600706	0.0942116	0.118431	0.118207	0.147265		68.6	0.0119734	0.0137988	0.0170601	0.0167348	0.0217547	0.0252771			68.6	0.0258097	0.0476047	0.0899583	0.123375	0.136564	0.131344		68.6	0.0104634	0.0117816	0.0147798	0.0191508	0.0248276	0.0281985			68.6	0.0158053	0.0485923	0.0725394	0.11381	0.11192	0.10183		68.6	0.00170543	0.00771825	0.00638443
				68.8	0.0364027	0.0610387	0.0950736	0.118314	0.118622	0.147805		68.8	0.0122687	0.0128305	0.017377	0.0161856	0.0229775	0.0246578			68.8	0.0261882	0.0484884	0.0903247	0.123701	0.13597	0.131871		68.8	0.0114184	0.0133105	0.0151687	0.019287	0.0243416	0.0278413			68.8	0.0145181	0.0493607	0.072355	0.113707	0.111786	0.103352		68.8	0.00084417	0.00752721	0.00689952
				69	0.0363855	0.0607964	0.0967981	0.118314	0.118859	0.149003		69	0.0132049	0.0124075	0.0167694	0.0169894	0.0240928	0.0240464			69	0.0264012	0.0494138	0.0905925	0.123289	0.135772	0.132082		69	0.0121107	0.0140938	0.0149235	0.01944	0.0242434	0.0275649			69	0.015504	0.0493046	0.0720333	0.115294	0.112067	0.103888		69	0.0006664	0.00717023	0.00690163
				69.2	0.0365197	0.0604792	0.0960137	0.118298	0.118329	0.148103		69.2	0.0127008	0.0117771	0.0158763	0.0165668	0.0253156	0.0242411			69.2	0.0262603	0.0491602	0.0904669	0.123855	0.135564	0.131802		69.2	0.013381	0.0145136	0.015276	0.0189285	0.0238668	0.0278366			69.2	0.0141282	0.0474737	0.071219	0.115914	0.112635	0.103274		69.2	0.00054509	0.00729852	0.00930076
				69.4	0.0369998	0.0606155	0.097115	0.117355	0.11811	0.148974		69.4	0.0121522	0.0121754	0.0159915	0.0167192	0.0250532	0.0237496			69.4	0.0262806	0.0494932	0.0900163	0.124155	0.135539	0.132645		69.4	0.0145254	0.0156815	0.015853	0.018818	0.0234512	0.0283932			69.4	0.0135108	0.0468539	0.0706847	0.117969	0.113381	0.104207		69.4	0.00100775	0.00758715	0.0103619
				69.6	0.0362525	0.0603387	0.0977279	0.117655	0.117739	0.1479		69.6	0.0118096	0.0120887	0.0162481	0.0167833	0.0248627	0.0238328			69.6	0.0267937	0.048821	0.0901202	0.123929	0.135978	0.132227		69.6	0.0142187	0.0166296	0.0156575	0.0184219	0.0228917	0.028706			69.6	0.0140329	0.0476716	0.0704885	0.117993	0.112892	0.104837		69.6	0.00204478	0.00754994	0.00993838
				69.8	0.0351776	0.0601777	0.0985863	0.116471	0.118404	0.147958		69.8	0.0111021	0.0116659	0.016182	0.0173635	0.0242229	0.0236867			69.8	0.0268543	0.0497813	0.0899263	0.123741	0.136905	0.13158		69.8	0.0153854	0.0167998	0.0153827	0.0184246	0.0207427	0.0294509			69.8	0.015085	0.0475569	0.0699528	0.118682	0.11322	0.103513		69.8	0.00180361	0.00765553	0.00960889
				70	0.0339845	0.0598761	0.0982054	0.116147	0.119163	0.147109		70	0.0102431	0.0116797	0.0158011	0.0172514	0.0234247	0.0230209			70	0.0274213	0.0505492	0.0892395	0.12423	0.136906	0.131399		70	0.015216	0.0173008	0.0159298	0.0184504	0.020153	0.0294531			70	0.0158752	0.0474168	0.0704794	0.120063	0.112858	0.102058		70	0.00193469	0.00706421	0.00845628
				70.2	0.0339459	0.0599686	0.0982025	0.11601	0.119979	0.146532		70.2	0.00855786	0.0117071	0.0155038	0.0170292	0.0230904	0.0216584			70.2	0.027549	0.0506287	0.0894669	0.12473	0.137298	0.130916		70.2	0.0155685	0.0172754	0.0158964	0.0184036	0.0203615	0.0294185			70.2	0.0158643	0.0483763	0.070163	0.119572	0.111874	0.102183		70.2	0.00153849	0.00798968	0.00805146
				70.4	0.0349623	0.0596768	0.0976482	0.115655	0.120863	0.146838		70.4	0.0086897	0.0122448	0.0152339	0.0177017	0.0218923	0.021058			70.4	0.0280367	0.0516953	0.0889888	0.124163	0.137646	0.130777		70.4	0.015704	0.0171121	0.0160381	0.0177731	0.0212374	0.0291948			70.4	0.017553	0.0485131	0.0703819	0.120175	0.112126	0.102042		70.4	0.00119388	0.00818816	0.00744633
				70.6	0.0347037	0.0602297	0.0972254	0.116714	0.122289	0.14623		70.6	0.00857812	0.0125373	0.0157031	0.018499	0.020295	0.0202572			70.6	0.0278682	0.0516864	0.0883788	0.12372	0.137207	0.130427		70.6	0.0153803	0.0163303	0.015238	0.0173589	0.02167	0.0303886			70.6	0.0183402	0.0503734	0.0725353	0.119573	0.111888	0.101719		70.6	0.00130159	0.00861067	0.00630923
				70.8	0.0343617	0.059827	0.0964854	0.116672	0.122537	0.146418		70.8	0.00880049	0.0134918	0.0157188	0.017608	0.0191374	0.0206134			70.8	0.0291394	0.051704	0.0885133	0.124136	0.137528	0.130408		70.8	0.0144088	0.0153402	0.0163532	0.0169964	0.0219242	0.0302748			70.8	0.0171682	0.050433	0.073012	0.118735	0.11215	0.100177		70.8	0.00109995	0.00886554	0.00542599
				71	0.033479	0.059303	0.0966069	0.116854	0.122679	0.146035		71	0.00890986	0.0139974	0.0166496	0.0179184	0.0172026	0.0211702			71	0.0289277	0.0526684	0.0895923	0.123317	0.137689	0.130576		71	0.0137661	0.0153069	0.0159358	0.0168072	0.0223145	0.0310337			71	0.0171477	0.0508578	0.0728157	0.119832	0.111011	0.10034		71	0.00086486	0.010098	0.00529973
				71.2	0.0328112	0.0593542	0.0960387	0.11789	0.122081	0.145109		71.2	0.0092343	0.0154733	0.0162925	0.0177192	0.0162151	0.0210005			71.2	0.0295963	0.0536315	0.089279	0.123367	0.137227	0.129849		71.2	0.0133335	0.0158656	0.0159864	0.015865	0.0223911	0.0305537			71.2	0.0179038	0.0499251	0.0748289	0.118824	0.11096	0.100624		71.2	0.00149856	0.00897273	0.00435632
				71.4	0.03235	0.0598373	0.0954164	0.118565	0.122362	0.144537		71.4	0.00842855	0.0159533	0.0155711	0.0180468	0.0153236	0.0220049			71.4	0.0297418	0.0547799	0.089143	0.123276	0.137289	0.130278		71.4	0.012775	0.0164034	0.015856	0.0157205	0.0228566	0.0303306			71.4	0.018257	0.0503849	0.0763058	0.117369	0.111178	0.100535		71.4	0.00040207	0.00944149	0.00302054
				71.6	0.0326044	0.0598732	0.0957903	0.119445	0.122546	0.144807		71.6	0.00745813	0.0158015	0.0155082	0.0180544	0.0142318	0.0230449			71.6	0.0300743	0.0553777	0.0896197	0.123719	0.137307	0.130672		71.6	0.012037	0.0154802	0.0161426	0.0161954	0.0230287	0.0293883			71.6	0.0185222	0.0507907	0.0767236	0.116433	0.111665	0.100734		71.6	0.00040939	0.00832322	0.00186407
				71.8	0.0323265	0.0598422	0.0947208	0.120017	0.122166	0.145785		71.8	0.00918148	0.0165854	0.015675	0.0187607	0.0133865	0.0234615			71.8	0.0305184	0.0549362	0.0889721	0.123354	0.137367	0.131905		71.8	0.0113306	0.0143166	0.0162535	0.0167356	0.0224588	0.0288964			71.8	0.0184828	0.0502066	0.0780717	0.116286	0.111282	0.100272		71.8	-0.00051898	0.00914718	0.00233896
				72	0.0328411	0.0603349	0.0948968	0.119828	0.121427	0.147069		72	0.00885785	0.0177387	0.0151109	0.0190063	0.0138941	0.023168			72	0.0308673	0.0535208	0.0896461	0.122917	0.13754	0.132168		72	0.0104202	0.0138855	0.0155989	0.0176962	0.0230715	0.0286142			72	0.0191094	0.0504581	0.077546	0.116031	0.110272	0.10013		72	0.00024558	0.0099917	0.00211142
				72.2	0.0322245	0.0601715	0.0954823	0.12001	0.12133	0.148684		72.2	0.00972811	0.0167271	0.0147139	0.0206521	0.0142787	0.0242196			72.2	0.0306403	0.0530413	0.0903354	0.122121	0.137736	0.13222		72.2	0.010796	0.014226	0.0150384	0.0178401	0.0221934	0.0279374			72.2	0.0196754	0.0491745	0.0776404	0.11512	0.109599	0.101016		72.2	0.00073328	0.0100188	0.00230751
				72.4	0.0322897	0.0597748	0.0943055	0.119557	0.121578	0.150829		72.4	0.00901478	0.0163787	0.015084	0.0203765	0.0151996	0.0248194			72.4	0.0305663	0.0529991	0.0906309	0.121804	0.137176	0.132358		72.4	0.0105606	0.0138284	0.0136763	0.0176897	0.0224725	0.0263981			72.4	0.0192021	0.0490201	0.0786197	0.114572	0.108857	0.103409		72.4	-0.00040529	0.0109774	0.00294454
				72.6	0.0322655	0.0595963	0.0947487	0.119702	0.120889	0.151285		72.6	0.00874449	0.0162602	0.0150209	0.021365	0.0156663	0.0257364			72.6	0.0303177	0.0529142	0.0901356	0.121311	0.136471	0.133117		72.6	0.0109616	0.0140282	0.013271	0.0174654	0.0215911	0.0261078			72.6	0.0199482	0.0487079	0.0789373	0.114801	0.108706	0.104099		72.6	7.43E-02	0.0118663	0.00377474
				72.8	0.0326925	0.0598442	0.0949464	0.119721	0.120075	0.151786		72.8	0.00912977	0.0156596	0.0154724	0.0226051	0.0163853	0.024857			72.8	0.0302506	0.05267	0.091263	0.121616	0.136183	0.133422		72.8	0.0112821	0.0144783	0.0137779	0.0171584	0.0210369	0.0250439			72.8	0.0198333	0.0476755	0.079006	0.113609	0.109483	0.105366		72.8	5.77E-02	0.0111782	0.00528725
				73	0.0333315	0.0592551	0.0958297	0.11939	0.119982	0.150722		73	0.00979453	0.0156791	0.0140268	0.0235513	0.0173131	0.0251275			73	0.0299329	0.0524337	0.0914916	0.12158	0.136546	0.13388		73	0.0112737	0.0138282	0.0129294	0.0167398	0.0205596	0.0250135			73	0.0202918	0.0469178	0.0783071	0.113602	0.110324	0.105749		73	0.00181728	0.00929248	0.00734475
				73.2	0.0335714	0.0590844	0.095831	0.119778	0.119768	0.150169		73.2	0.00941635	0.0145444	0.0136101	0.0235321	0.0175273	0.0252827			73.2	0.0289438	0.0520371	0.0919528	0.122006	0.136348	0.133828		73.2	0.0123094	0.0137181	0.013384	0.0161207	0.0201185	0.0246478			73.2	0.0195092	0.0460714	0.0783688	0.112707	0.111754	0.107074		73.2	0.00175382	0.00916425	0.00930353
				73.4	0.0329799	0.0595766	0.0967397	0.119493	0.119831	0.150363		73.4	0.00960553	0.014523	0.0135365	0.0240055	0.017846	0.0254623			73.4	0.0278949	0.0515194	0.0920041	0.121724	0.137596	0.134832		73.4	0.0126041	0.0134398	0.0140428	0.0164033	0.0187729	0.0247472			73.4	0.0201103	0.0466011	0.0774396	0.113578	0.111308	0.107389		73.4	0.00296398	0.00843995	0.00844472
				73.6	0.032735	0.0596867	0.0967907	0.118826	0.120428	0.149415		73.6	0.0106105	0.0140559	0.013812	0.0236603	0.0182086	0.0250527			73.6	0.0279332	0.0505016	0.0923166	0.122058	0.138329	0.134988		73.6	0.0111481	0.0126888	0.01377	0.0156212	0.0185548	0.0248726			73.6	0.0222712	0.0455638	0.0773798	0.113543	0.11086	0.106709		73.6	0.00267648	0.0078552	0.00819004
				73.8	0.0339076	0.0597408	0.0974469	0.11779	0.1206	0.148637		73.8	0.0110739	0.0139857	0.0138905	0.0232805	0.0187695	0.0253445			73.8	0.0271537	0.0503322	0.0917172	0.122258	0.138812	0.134414		73.8	0.0126349	0.0124904	0.0138732	0.0156593	0.018908	0.025309			73.8	0.021681	0.044836	0.0765114	0.113216	0.111869	0.104825		73.8	0.00176919	0.00814873	0.00888584
				74	0.0349873	0.060287	0.0975349	0.117515	0.120782	0.148031		74	0.0116035	0.013993	0.0140964	0.0225812	0.0186536	0.0244757			74	0.0273424	0.0499281	0.0904995	0.122933	0.139464	0.134325		74	0.0124202	0.0117647	0.0147059	0.0147876	0.0193698	0.02535			74	0.0218083	0.0447914	0.0765981	0.114265	0.111754	0.104253		74	0.00271645	0.00752815	0.00843617
				74.2	0.036278	0.0595519	0.0976519	0.117152	0.12113	0.147505		74.2	0.0118918	0.0142602	0.015445	0.0216807	0.0189721	0.023573			74.2	0.0272907	0.049932	0.0900127	0.122557	0.14053	0.134257		74.2	0.0120432	0.0118394	0.0151218	0.0150879	0.0207531	0.0258329			74.2	0.0218199	0.0450392	0.0762866	0.115593	0.112418	0.103949		74.2	0.00241035	0.00774551	0.0089576
				74.4	0.0366946	0.0596169	0.0979435	0.117023	0.121424	0.146663		74.4	0.0128854	0.0144535	0.0156276	0.020936	0.018968	0.0227382			74.4	0.0272477	0.050087	0.0894731	0.122738	0.140406	0.134272		74.4	0.011784	0.0115011	0.0164163	0.0154313	0.0220388	0.0259309			74.4	0.0219714	0.044708	0.0758406	0.116351	0.113022	0.102692		74.4	0.00144855	0.00774217	0.00860908
				74.6	0.0363148	0.0593952	0.098663	0.117212	0.121951	0.145921		74.6	0.0136796	0.0146284	0.0160787	0.0199649	0.0186944	0.0225054			74.6	0.0277514	0.0501286	0.0883561	0.122851	0.140381	0.134068		74.6	0.010893	0.0116526	0.0160684	0.0151536	0.0219323	0.0269249			74.6	0.0214414	0.0461982	0.0765241	0.11762	0.111386	0.10135		74.6	0.00176306	0.00867616	0.00828662
				74.8	0.0355358	0.0581798	0.099453	0.11677	0.121248	0.146646		74.8	0.0144675	0.0149079	0.0161877	0.0184243	0.0191868	0.0224819			74.8	0.0280192	0.0503614	0.0879662	0.123547	0.140667	0.133292		74.8	0.0100985	0.011956	0.0167235	0.0148625	0.0232182	0.0271016			74.8	0.0212561	0.0462763	0.0764404	0.119025	0.11011	0.0991921		74.8	0.00102249	0.0088445	0.0082761
				75	0.0358563	0.0584379	0.100512	0.117517	0.121341	0.145975		75	0.0138923	0.0150492	0.0160246	0.0184571	0.0189753	0.0226888			75	0.0276294	0.0517587	0.0885887	0.123385	0.140816	0.13244		75	0.00975271	0.0134907	0.0175783	0.0145014	0.0235411	0.0270532			75	0.0203064	0.0468698	0.0772018	0.119984	0.109579	0.0991633		75	0.00034192	0.00923446	0.00910844
				75.2	0.0368803	0.0591067	0.0998497	0.11868	0.121235	0.145636		75.2	0.0138504	0.0151516	0.0160588	0.0175862	0.0192004	0.0230947			75.2	0.028065	0.0526279	0.0876612	0.123431	0.140149	0.131908		75.2	0.0101768	0.0132205	0.0183818	0.0146001	0.0236144	0.026724			75.2	0.0204751	0.0476171	0.0792345	0.1201	0.109888	0.0985398		75.2	0.00021595	0.00908092	0.0085833
				75.4	0.0371236	0.0588605	0.0998232	0.118619	0.121273	0.146054		75.4	0.0142465	0.0144773	0.0156334	0.0166767	0.0196916	0.0229579			75.4	0.0284339	0.0525479	0.0873875	0.122528	0.139869	0.13212		75.4	0.0108378	0.0124088	0.0181753	0.0150953	0.0233068	0.0266696			75.4	0.0191872	0.0488708	0.0805324	0.120156	0.110649	0.0988701		75.4	-0.00135858	0.0104554	0.00813614
				75.6	0.0369987	0.0589912	0.099273	0.118362	0.121231	0.146495		75.6	0.013354	0.0140737	0.0150861	0.0154996	0.0202601	0.0226189			75.6	0.0295495	0.0521914	0.0875146	0.122935	0.13917	0.1316		75.6	0.00986335	0.0113135	0.0189629	0.0160673	0.0237226	0.0260473			75.6	0.0191651	0.048554	0.0801686	0.120594	0.110694	0.0988771		75.6	-0.0013145	0.0108222	0.00879837
				75.8	0.037417	0.0593333	0.0983059	0.118074	0.121075	0.148131		75.8	0.0136864	0.0139682	0.0145689	0.0161949	0.0202386	0.0219071			75.8	0.0311149	0.0521432	0.0874633	0.122475	0.138146	0.131092		75.8	0.0102083	0.0107361	0.0182059	0.0164609	0.0232012	0.0271069			75.8	0.0183582	0.0484902	0.0802406	0.121648	0.110449	0.098914		75.8	-0.00173113	0.010933	0.00874067
				76	0.0372068	0.0597351	0.0981982	0.118788	0.121137	0.149205		76	0.0130025	0.0141758	0.0139709	0.0159228	0.0214265	0.0218786			76	0.0317448	0.0524584	0.0880332	0.122271	0.137408	0.13039		76	0.0108986	0.0106874	0.0176167	0.0164743	0.0232018	0.0266159			76	0.0181549	0.048449	0.0796753	0.121777	0.110629	0.0989423		76	-0.00083888	0.0112704	0.00762605
				76.2	0.0357619	0.0589923	0.0968216	0.119489	0.121469	0.148701		76.2	0.0122758	0.013413	0.0130184	0.0157707	0.0210169	0.0220906			76.2	0.0324477	0.0527344	0.0878862	0.121587	0.135719	0.130856		76.2	0.0118919	0.010525	0.0172418	0.0166956	0.022358	0.027356			76.2	0.0178407	0.0482001	0.079884	0.120603	0.110429	0.100439		76.2	-0.00116075	0.011269	0.00766163
				76.4	0.0354702	0.0591708	0.0957835	0.119557	0.120573	0.149029		76.4	0.0116767	0.0132354	0.0131971	0.0155995	0.0217213	0.0216055			76.4	0.033476	0.0525336	0.0875392	0.121495	0.13425	0.130937		76.4	0.0120035	0.00987079	0.0171362	0.0169973	0.0219317	0.0265714			76.4	0.0180902	0.0482134	0.0796157	0.119745	0.11033	0.101508		76.4	-0.00183668	0.0118415	0.00762229
				76.6	0.0351741	0.059566	0.0960524	0.119346	0.119717	0.148438		76.6	0.0105971	0.0138545	0.0132258	0.01624	0.0209212	0.0215386			76.6	0.0337844	0.0530399	0.0878632	0.121421	0.1343	0.130876		76.6	0.0122921	0.0105319	0.0174276	0.017757	0.0219008	0.0260096			76.6	0.0192456	0.0483482	0.0779468	0.11904	0.11076	0.101426		76.6	-0.00014808	0.0119928	0.00831835
				76.8	0.0346801	0.0604673	0.0962075	0.119777	0.120338	0.148849		76.8	0.0114053	0.0141226	0.0135498	0.0166584	0.0207869	0.0204154			76.8	0.0339327	0.0531862	0.0891166	0.121558	0.134365	0.131283		76.8	0.0136376	0.0101969	0.017686	0.0174079	0.0207099	0.0255251			76.8	0.018436	0.0482273	0.0770495	0.117094	0.112547	0.102128		76.8	0.00067916	0.0115015	0.0083182
				77	0.0347727	0.0610711	0.0964773	0.119063	0.120707	0.147655		77	0.0109164	0.0146768	0.0122977	0.0169854	0.0208585	0.0208252			77	0.0338327	0.0533697	0.0885579	0.122208	0.134501	0.131656		77	0.0136992	0.0100824	0.0169874	0.0170867	0.0193508	0.0254418			77	0.0177468	0.0491891	0.0757119	0.115643	0.113039	0.102474		77	0.00153408	0.011198	0.00770586
				77.2	0.033185	0.0625306	0.0953993	0.119745	0.120707	0.148817		77.2	0.0106753	0.0143824	0.0129578	0.0179848	0.0200988	0.0206872			77.2	0.0339082	0.0524655	0.0884994	0.122458	0.134944	0.132687		77.2	0.0143796	0.0102695	0.0177854	0.0176734	0.0187745	0.0256632			77.2	0.018234	0.0485609	0.0751286	0.114465	0.112865	0.103745		77.2	0.00241948	0.0113393	0.00687405
				77.4	0.0328009	0.0636593	0.0960866	0.119247	0.120457	0.149757		77.4	0.0105805	0.0150665	0.012997	0.0181858	0.0198446	0.0208365			77.4	0.0332489	0.0522545	0.0879626	0.122495	0.136205	0.133002		77.4	0.0144929	0.00998874	0.017606	0.0176742	0.0188505	0.0253316			77.4	0.0179499	0.048416	0.0746985	0.113691	0.112978	0.103738		77.4	0.0037764	0.0116849	0.00682872
				77.6	0.0334645	0.0641641	0.0961403	0.118152	0.120474	0.14971		77.6	0.0110625	0.0157201	0.0129899	0.0185967	0.0194855	0.0206398			77.6	0.0335344	0.0525527	0.0876517	0.122649	0.136967	0.132727		77.6	0.0145782	0.00901728	0.0174119	0.0180447	0.0193223	0.0247708			77.6	0.0184021	0.0472823	0.0751605	0.111306	0.113507	0.103048		77.6	0.00328234	0.0113847	0.00701906
				77.8	0.03343	0.0647328	0.0971688	0.117197	0.120892	0.14822		77.8	0.0105303	0.0172128	0.0130661	0.0191556	0.019612	0.0211524			77.8	0.032654	0.0524258	0.0872048	0.12271	0.137469	0.132066		77.8	0.0156757	0.00874061	0.0182866	0.0179657	0.019478	0.0247134			77.8	0.0173752	0.0465822	0.0750557	0.111528	0.11367	0.102863		77.8	0.00349854	0.0113668	0.00795641
				78	0.0344815	0.0652418	0.0981647	0.116906	0.121055	0.147643		78	0.0109299	0.0172987	0.0135082	0.0191117	0.0181247	0.0214843			78	0.0321525	0.0524478	0.0861153	0.122724	0.137861	0.132212		78	0.0155852	0.00852251	0.0187643	0.0177346	0.0201932	0.0254441			78	0.0181835	0.0459519	0.0751759	0.112508	0.113478	0.104074		78	0.0036619	0.011529	0.00666405
				78.2	0.0350258	0.06543	0.098701	0.116569	0.122067	0.147305		78.2	0.0114905	0.0175539	0.0141634	0.0190759	0.0177888	0.0219938			78.2	0.0315308	0.05235	0.0860497	0.122626	0.138301	0.13261		78.2	0.0152688	0.00971958	0.0187155	0.01866	0.0215909	0.0258852			78.2	0.0191264	0.0459951	0.0750995	0.112195	0.114062	0.104824		78.2	0.00292163	0.0126109	0.00703213
				78.4	0.0345087	0.065521	0.0993901	0.117132	0.123484	0.14707		78.4	0.0115843	0.0171491	0.0133405	0.0198489	0.0178367	0.0230732			78.4	0.0305662	0.0530256	0.0859306	0.123703	0.138519	0.133356		78.4	0.0159786	0.0104632	0.0180998	0.019017	0.0224674	0.0249969			78.4	0.0196536	0.0462738	0.0748542	0.112409	0.113997	0.105331		78.4	0.00154344	0.0131775	0.00606516
				78.6	0.034863	0.0650667	0.0997206	0.11654	0.123686	0.14767		78.6	0.0116154	0.0167133	0.0136592	0.0194931	0.0183069	0.0234777			78.6	0.030554	0.05359	0.0862168	0.123901	0.139126	0.133815		78.6	0.0150291	0.0107166	0.0169777	0.0179246	0.0230027	0.0254136			78.6	0.0201665	0.0469288	0.075927	0.113639	0.112973	0.105117		78.6	0.00156731	0.013269	0.00502985
				78.8	0.0352937	0.0636688	0.100475	0.117999	0.124411	0.14785		78.8	0.0118088	0.0167445	0.0138532	0.0187487	0.0179281	0.0236269			78.8	0.0308447	0.0529911	0.0863425	0.123222	0.139547	0.133325		78.8	0.0150511	0.0110799	0.0169302	0.0171642	0.0237395	0.0249284			78.8	0.0198017	0.0460918	0.0757762	0.113307	0.112874	0.105362		78.8	0.00058967	0.012943	0.00432849
				79	0.0364296	0.0632953	0.100284	0.11823	0.125041	0.147674		79	0.0111466	0.0166268	0.0142081	0.0182411	0.0181852	0.0244012			79	0.0302657	0.0539687	0.0869565	0.122757	0.13948	0.134004		79	0.014456	0.0113618	0.0172954	0.0172327	0.0236405	0.0256149			79	0.0198839	0.04516	0.0764986	0.113512	0.113335	0.10704		79	-0.00010291	0.0114695	0.00510265
				79.2	0.0368552	0.0624481	0.0989758	0.11858	0.125402	0.148299		79.2	0.0118563	0.0168413	0.0141123	0.0174208	0.0190935	0.0242701			79.2	0.0296286	0.0531094	0.0867319	0.122057	0.13939	0.134363		79.2	0.0140436	0.011017	0.0171789	0.0169279	0.0234337	0.0263664			79.2	0.0202197	0.0454383	0.0772663	0.114026	0.113468	0.10815		79.2	-0.00010046	0.0114558	0.00500706
				79.4	0.036009	0.0624766	0.0994071	0.11803	0.125067	0.149806		79.4	0.0119981	0.0170279	0.0141403	0.0169693	0.0191252	0.023862			79.4	0.0298705	0.0528327	0.0866991	0.121345	0.138306	0.134165		79.4	0.0135508	0.0108401	0.0162996	0.0155781	0.0233734	0.025899			79.4	0.0201081	0.0441091	0.0775918	0.114165	0.113473	0.109032		79.4	-0.00072785	0.0103443	0.00575299
				79.6	0.0351034	0.0618821	0.0997934	0.11855	0.124873	0.150441		79.6	0.0105357	0.0164192	0.0144948	0.0166269	0.0189797	0.0238434			79.6	0.0309181	0.0526915	0.0873355	0.121962	0.137943	0.134129		79.6	0.0122899	0.011516	0.0160064	0.0154042	0.0235549	0.0265455			79.6	0.0206596	0.0434038	0.0769693	0.114281	0.113791	0.109915		79.6	-0.00020983	0.0093487	0.00628926
				79.8	0.0360741	0.0619424	0.0990645	0.119066	0.123623	0.15069		79.8	0.0101281	0.0164516	0.0146765	0.0174204	0.0194485	0.023766			79.8	0.0310478	0.0525195	0.0883614	0.121803	0.137664	0.133154		79.8	0.0121812	0.0110244	0.0156838	0.0145954	0.023586	0.0273619			79.8	0.0215107	0.0434955	0.0764013	0.115048	0.114733	0.109199		79.8	-0.00078376	0.00874125	0.00581452
				80	0.0354419	0.0609994	0.0988768	0.120352	0.122978	0.150115		80	0.0103083	0.0162482	0.0144394	0.0163412	0.0194876	0.0242445			80	0.0306478	0.0522538	0.0885735	0.122027	0.137735	0.132871		80	0.0120452	0.0114717	0.0157035	0.0143436	0.0243806	0.0262967			80	0.0222177	0.0443719	0.0774128	0.116426	0.11552	0.108544		80	-0.00091524	0.00880159	0.00577825
				80.2	0.0349697	0.0605876	0.0979258	0.119942	0.122361	0.14911		80.2	0.0107527	0.0159997	0.0142183	0.015224	0.0189658	0.0241982			80.2	0.0304899	0.0516207	0.0886896	0.121605	0.137617	0.13244		80.2	0.0109812	0.011924	0.0151447	0.0143069	0.0249283	0.0268578			80.2	0.0222516	0.0444484	0.0779227	0.116477	0.114721	0.109314		80.2	-0.00108206	0.00949566	0.0073704
				80.4	0.0354051	0.0611343	0.0977515	0.11975	0.121915	0.149		80.4	0.010819	0.015558	0.0151912	0.0154109	0.0192674	0.0236755			80.4	0.0297456	0.0507153	0.0893504	0.122596	0.137915	0.132789		80.4	0.0109878	0.0124807	0.0151691	0.0128801	0.026039	0.0252916			80.4	0.022784	0.0446915	0.0775534	0.116348	0.115541	0.108702		80.4	-0.0016236	0.00990786	0.00773924
				80.6	0.0344672	0.060487	0.0972741	0.119867	0.122174	0.14914		80.6	0.00986697	0.0153323	0.0151421	0.0146402	0.0183674	0.0238177			80.6	0.0294941	0.0506905	0.0902913	0.123449	0.138567	0.132337		80.6	0.0108736	0.0125837	0.0145206	0.0134501	0.0257136	0.0246502			80.6	0.022139	0.0441704	0.0761558	0.116246	0.116138	0.107778		80.6	-0.00138374	0.00942504	0.00730436
				80.8	0.0343399	0.0603858	0.0966768	0.121095	0.121799	0.149463		80.8	0.0104723	0.0145214	0.0157318	0.0158707	0.0185198	0.0237017			80.8	0.0293015	0.049723	0.0902355	0.12385	0.138854	0.133547		80.8	0.011486	0.0129015	0.0144879	0.0125035	0.0239455	0.0254874			80.8	0.0217791	0.0442859	0.0762229	0.116038	0.116271	0.106679		80.8	-0.00181084	0.00897625	0.0077968
				81	0.0341616	0.060781	0.0954854	0.121278	0.121437	0.148661		81	0.0100337	0.0150782	0.0154947	0.0157214	0.018566	0.0239685			81	0.0291489	0.0489692	0.089412	0.125	0.139085	0.133274		81	0.0103922	0.0131643	0.0138492	0.0125649	0.0237454	0.0250626			81	0.0215384	0.0462438	0.0758904	0.117265	0.114947	0.10672		81	-0.0021357	0.00923971	0.00784398
				81.2	0.0338118	0.0606313	0.0953994	0.121265	0.121251	0.149446		81.2	0.00890079	0.015039	0.0164063	0.0168029	0.0186925	0.023565			81.2	0.0285963	0.0483991	0.0889633	0.12476	0.139751	0.133851		81.2	0.0103901	0.0131816	0.0143754	0.0136038	0.0234963	0.0251491			81.2	0.0209148	0.0457836	0.0764401	0.117611	0.11368	0.106181		81.2	-0.00194602	0.00929893	0.00957443
				81.4	0.0336402	0.0601441	0.0951705	0.119938	0.120633	0.148408		81.4	0.00829316	0.0147446	0.0159596	0.0175073	0.0196367	0.0243369			81.4	0.027596	0.0495065	0.0889974	0.125127	0.139254	0.13327		81.4	0.0103427	0.0130586	0.0145114	0.0135248	0.0237034	0.024914			81.4	0.0195152	0.0462156	0.0768024	0.117504	0.113907	0.106809		81.4	-0.00192558	0.00909394	0.010696
				81.6	0.0330832	0.0604094	0.0953399	0.119041	0.120783	0.147362		81.6	0.00878628	0.0142002	0.0155122	0.0182595	0.0189538	0.0248358			81.6	0.0273332	0.0500885	0.089347	0.125587	0.139844	0.133721		81.6	0.0100278	0.0129127	0.0144387	0.0139388	0.0232101	0.0252457			81.6	0.0190701	0.0457757	0.0775887	0.117344	0.113514	0.106424		81.6	-0.00236033	0.00893162	0.0118208
				81.8	0.032646	0.0606489	0.0960607	0.11911	0.120684	0.146358		81.8	0.00829045	0.0139884	0.0160047	0.0187523	0.0192021	0.0255179			81.8	0.0265474	0.0500566	0.088941	0.126278	0.139837	0.134261		81.8	0.0099029	0.0137221	0.0139376	0.013602	0.0221034	0.0255841			81.8	0.0178332	0.0459619	0.0770579	0.118477	0.11304	0.106924		81.8	-0.00265048	0.0097346	0.0122115
				82	0.0327672	0.0602543	0.0972238	0.119027	0.120995	0.146364		82	0.0089895	0.0132546	0.0158857	0.0191407	0.0185535	0.0254653			82	0.0258735	0.0501423	0.0887415	0.127058	0.141177	0.135071		82	0.00981423	0.014304	0.0133776	0.0128934	0.0217893	0.0255036			82	0.0176748	0.0474603	0.0773632	0.118283	0.113419	0.107518		82	-0.00202955	0.00958482	0.0103708
				82.2	0.0322287	0.0596145	0.0971174	0.118952	0.121053	0.147249		82.2	0.00897574	0.0128851	0.0153481	0.0191471	0.0196211	0.0255711			82.2	0.0259596	0.050624	0.0894816	0.12801	0.141628	0.135725		82.2	0.00973244	0.014928	0.0139779	0.0129881	0.0214901	0.024637			82.2	0.0185006	0.0480977	0.076314	0.117393	0.113676	0.1069		82.2	-0.00062955	0.00950051	0.00982525
				82.4	0.0322603	0.0585675	0.0968302	0.119552	0.121049	0.147396		82.4	0.00916041	0.0114334	0.0145791	0.0192763	0.0200532	0.0249365			82.4	0.0265178	0.0521015	0.0900044	0.128927	0.14128	0.136747		82.4	0.00994967	0.0142408	0.0140222	0.0131574	0.0204486	0.024269			82.4	0.0181627	0.0485218	0.0754592	0.1173	0.113719	0.106572		82.4	3.54E-02	0.00829001	0.00799445
				82.6	0.0330919	0.0579527	0.0977911	0.119008	0.120801	0.147501		82.6	0.00918903	0.0111337	0.0156762	0.0187498	0.0198468	0.0255497			82.6	0.0272049	0.052319	0.0900087	0.127723	0.140961	0.136032		82.6	0.00989776	0.0133644	0.0146651	0.0124964	0.02043	0.0234615			82.6	0.0178102	0.0480827	0.0759702	0.11743	0.113707	0.105928		82.6	0.00070625	0.00760982	0.0076124
				82.8	0.0333546	0.0577203	0.0994407	0.120036	0.12161	0.147832		82.8	0.00926899	0.0123436	0.0146964	0.0181247	0.0201515	0.0259213			82.8	0.0282833	0.0526402	0.0901549	0.127416	0.141009	0.13589		82.8	0.00973146	0.0134034	0.0150161	0.01273	0.0199679	0.0223847			82.8	0.0168878	0.0471932	0.0743172	0.117482	0.114455	0.106089		82.8	0.00042711	0.00640855	0.00670732
				83	0.0339143	0.0576587	0.099427	0.119886	0.121471	0.149747		83	0.00902029	0.012156	0.01432	0.0182696	0.0218302	0.0253676			83	0.0281222	0.053022	0.0900182	0.127876	0.141259	0.135708		83	0.00973961	0.0137137	0.0150801	0.0136911	0.0193984	0.0233719			83	0.0182062	0.0468498	0.0751813	0.117951	0.114406	0.106507		83	0.00109641	0.00561833	0.00769054
				83.2	0.0336426	0.0589389	0.0996378	0.120513	0.120916	0.150667		83.2	0.00871099	0.0121496	0.0133848	0.0185643	0.0218508	0.0250306			83.2	0.0286267	0.051589	0.0898953	0.127397	0.141209	0.13574		83.2	0.00991472	0.0134824	0.015044	0.0120857	0.0188202	0.0231183			83.2	0.0183874	0.0467697	0.074721	0.117665	0.114524	0.106311		83.2	0.00148901	0.00536722	0.0064638
				83.4	0.0329665	0.0593941	0.100482	0.120152	0.120785	0.150908		83.4	0.0080779	0.0119665	0.0134794	0.0181703	0.0214312	0.0246579			83.4	0.029511	0.0511298	0.0909698	0.127815	0.140746	0.13582		83.4	0.0097627	0.0130149	0.0146593	0.0109462	0.0186791	0.0234585			83.4	0.0189487	0.0458341	0.0739907	0.117175	0.115163	0.106668		83.4	0.00115891	0.00516118	0.00601567
				83.6	0.033484	0.059701	0.100506	0.120386	0.120269	0.151156		83.6	0.0083121	0.0119205	0.0129177	0.0168174	0.0219941	0.0245508			83.6	0.0305613	0.0506532	0.0906075	0.126962	0.141919	0.13536		83.6	0.00962103	0.0128359	0.0153027	0.0118271	0.018945	0.0236453			83.6	0.0196081	0.0465908	0.073457	0.116672	0.1154	0.10695		83.6	0.00276156	0.00534899	0.0051747
				83.8	0.0341182	0.0601511	0.100502	0.120108	0.120242	0.150973		83.8	0.00890593	0.0122253	0.0130394	0.0173031	0.0223806	0.0244461			83.8	0.0307633	0.0500555	0.0906046	0.126444	0.142011	0.134466		83.8	0.0102369	0.0123829	0.0147065	0.012249	0.0191822	0.023795			83.8	0.0206518	0.0464474	0.0743601	0.117821	0.116382	0.105642		83.8	0.00255842	0.00640306	0.00378701
				84	0.0335415	0.0598288	0.101231	0.119518	0.12067	0.150394		84	0.0098325	0.0127494	0.012902	0.0167346	0.0222703	0.0248889			84	0.0309481	0.049852	0.0908918	0.126306	0.142397	0.134034		84	0.0107884	0.012112	0.0149309	0.0125227	0.0197394	0.0233308			84	0.0213801	0.0463837	0.0755702	0.118228	0.1164	0.105242		84	0.00252927	0.00704866	0.00294678
				84.2	0.0335054	0.0602011	0.100869	0.119424	0.121057	0.150483		84.2	0.0101381	0.0129115	0.0131929	0.0161774	0.0218044	0.0247385			84.2	0.0310821	0.0494437	0.0908929	0.125502	0.143129	0.133432		84.2	0.0104694	0.0119678	0.0149605	0.0126638	0.0195972	0.0230113			84.2	0.0215141	0.0458712	0.0756499	0.117575	0.116116	0.10614		84.2	0.00187398	0.00711275	0.00280359
				84.4	0.0340542	0.0599538	0.10053	0.119542	0.1216	0.149834		84.4	0.0103802	0.0132779	0.0132189	0.0161291	0.0208591	0.024447			84.4	0.0316348	0.0484842	0.0911116	0.126299	0.142666	0.133584		84.4	0.0114059	0.0116281	0.0150958	0.0135195	0.0202915	0.0229459			84.4	0.0216557	0.0457556	0.0751113	0.118079	0.116919	0.10558		84.4	0.00106455	0.0070254	0.00140954
				84.6	0.0333823	0.0596143	0.100316	0.119858	0.12165	0.149919		84.6	0.0106041	0.013946	0.0124954	0.0162661	0.0198423	0.02459			84.6	0.0331038	0.0484242	0.0912738	0.125684	0.141426	0.132895		84.6	0.0110209	0.0109805	0.014676	0.014469	0.0201539	0.0228876			84.6	0.0220344	0.0450082	0.0754702	0.118623	0.116964	0.105029		84.6	0.00046074	0.00657852	0.00113331
				84.8	0.0331359	0.0601015	0.0990687	0.120731	0.12218	0.15044		84.8	0.0115216	0.0150657	0.0125516	0.0170353	0.0192382	0.0250057			84.8	0.0335198	0.047987	0.0909965	0.125463	0.141046	0.133488		84.8	0.0116652	0.0112455	0.0151014	0.0140658	0.020245	0.0229962			84.8	0.0226672	0.044617	0.0768469	0.119684	0.116375	0.104473		84.8	0.00046168	0.007217	0.0020212
				85	0.0320726	0.0607171	0.0981939	0.119527	0.122008	0.149438		85	0.0108472	0.0167887	0.0130244	0.0158203	0.0188088	0.0246638			85	0.0332698	0.0470895	0.0914577	0.125821	0.14117	0.133416		85	0.0115222	0.0111971	0.0146917	0.0147641	0.0205073	0.0226652			85	0.0227067	0.0451572	0.0771904	0.120629	0.114816	0.103715		85	0.00011492	0.00753601	0.00305021
				85.2	0.0323567	0.0599517	0.0980574	0.118162	0.122113	0.149227		85.2	0.00994587	0.0170993	0.0134481	0.0169746	0.0192062	0.0243903			85.2	0.0320079	0.0473652	0.0921932	0.125514	0.140944	0.135073		85.2	0.0111161	0.0111584	0.0157275	0.0157979	0.0195652	0.0227233			85.2	0.0223244	0.0443529	0.0775374	0.121105	0.114433	0.103937		85.2	0.00046478	0.00796637	0.00430834
				85.4	0.0324819	0.0608153	0.0969721	0.118269	0.121914	0.148981		85.4	0.0111756	0.0177664	0.0134123	0.0170032	0.0192649	0.0243817			85.4	0.0325988	0.0466425	0.0929616	0.124932	0.140884	0.135552		85.4	0.0106084	0.0110996	0.0154865	0.0162482	0.0197783	0.0229428			85.4	0.02257	0.0438479	0.0776802	0.120509	0.114866	0.10394		85.4	0.00015552	0.00764501	0.00478945
				85.6	0.0322445	0.0619727	0.0969969	0.117458	0.122973	0.148955		85.6	0.0113461	0.0177538	0.0129241	0.0170769	0.0178151	0.0235835			85.6	0.0320847	0.0470932	0.0926804	0.125026	0.141834	0.136652		85.6	0.00998906	0.0115622	0.0155252	0.0163888	0.019952	0.0236203			85.6	0.0223318	0.0438804	0.0778919	0.120475	0.114722	0.104121		85.6	-1.98e-05	0.00784088	0.00582604
				85.8	0.0319058	0.0621516	0.0968811	0.117759	0.123055	0.148639		85.8	0.0110181	0.0174689	0.0129722	0.0165185	0.0177628	0.0223652			85.8	0.0318281	0.0476791	0.0930957	0.12596	0.141679	0.137265		85.8	0.00990104	0.0119714	0.0152412	0.0175336	0.0194227	0.0247347			85.8	0.0221959	0.0451748	0.0776555	0.120112	0.115376	0.10408		85.8	0.00074172	0.00809872	0.00541888
				86	0.0314544	0.0616088	0.0979729	0.117874	0.123623	0.148849		86	0.0112178	0.0166874	0.0129408	0.0157172	0.0170518	0.0211066			86	0.0312159	0.0474765	0.0927333	0.125974	0.141426	0.137426		86	0.00935949	0.0121745	0.0169407	0.0175458	0.0199358	0.0248905			86	0.0232926	0.04573	0.0796795	0.119737	0.11531	0.103144		86	0.00148549	0.00753214	0.00549061
				86.2	0.0327414	0.0616336	0.0976838	0.117461	0.123181	0.149172		86.2	0.0112028	0.0155458	0.0121245	0.016129	0.0174592	0.0213287			86.2	0.0315311	0.0485765	0.09278	0.125644	0.139973	0.138233		86.2	0.009546	0.0120012	0.0181228	0.0184203	0.0202242	0.0248113			86.2	0.0239682	0.0449908	0.0788471	0.119797	0.114888	0.10297		86.2	0.00211074	0.00693235	0.00654325
				86.4	0.0323395	0.0621061	0.0985392	0.117095	0.123607	0.148607		86.4	0.0117275	0.0149045	0.0121918	0.015658	0.0175792	0.020939			86.4	0.0314947	0.0501312	0.0919679	0.124748	0.139583	0.138024		86.4	0.00991732	0.0115721	0.0180172	0.0188708	0.0200331	0.0242267			86.4	0.0227357	0.0463442	0.0809284	0.119721	0.114638	0.103545		86.4	0.00083244	0.00738395	0.00702628
				86.6	0.0325328	0.0628947	0.0998669	0.116865	0.12418	0.14872		86.6	0.0107479	0.0160113	0.0125051	0.0161655	0.0176663	0.0211714			86.6	0.030854	0.0511975	0.0919454	0.122916	0.139931	0.137419		86.6	0.0105592	0.011587	0.0181192	0.0185181	0.0203729	0.0231335			86.6	0.0222955	0.0464836	0.0827278	0.119927	0.115146	0.103858		86.6	0.00027781	0.00745459	0.0071683
				86.8	0.0332854	0.0635334	0.10013	0.117987	0.124665	0.149638		86.8	0.0101545	0.0159627	0.0121792	0.0152193	0.0181023	0.0200256			86.8	0.030446	0.0510035	0.0919683	0.122892	0.140013	0.138583		86.8	0.0103515	0.0113477	0.0178656	0.0186842	0.0203491	0.0240307			86.8	0.021452	0.0458335	0.0822612	0.118993	0.115729	0.103599		86.8	-0.00018152	0.00610662	0.00672639
				87	0.0336641	0.0643193	0.100414	0.119044	0.124905	0.150176		87	0.00937719	0.0143116	0.0120868	0.0161345	0.0181547	0.0194489			87	0.0306368	0.0509227	0.0910264	0.122531	0.14084	0.138627		87	0.0109932	0.0112411	0.0168273	0.0181806	0.0209237	0.0247082			87	0.0217353	0.0463841	0.0828305	0.118047	0.114909	0.103866		87	0.00103758	0.00634184	0.00754971
				87.2	0.0340808	0.0649026	0.100145	0.119259	0.12528	0.150193		87.2	0.00827506	0.0132107	0.0115138	0.016119	0.0179301	0.0191393			87.2	0.0300954	0.0503135	0.0915818	0.122032	0.141473	0.139386		87.2	0.0110542	0.0101267	0.0158742	0.0172306	0.021003	0.0247747			87.2	0.0212335	0.0471744	0.0829626	0.117054	0.115423	0.104135		87.2	0.00080079	0.00580071	0.00592123
				87.4	0.0342429	0.0640321	0.0996808	0.119414	0.124548	0.150512		87.4	0.00860906	0.0131345	0.0113958	0.0154249	0.0182382	0.0183602			87.4	0.0298066	0.050915	0.0913987	0.12242	0.142874	0.13957		87.4	0.0109436	0.0098205	0.0162967	0.0171749	0.0213668	0.0255184			87.4	0.0200604	0.0476492	0.0831433	0.116594	0.115867	0.105091		87.4	0.00150224	0.00644866	0.00575137
				87.6	0.034775	0.0647233	0.100737	0.119072	0.124574	0.151486		87.6	0.00932215	0.0132088	0.0110005	0.015166	0.0190844	0.0190877			87.6	0.0301116	0.051445	0.0902124	0.122154	0.143116	0.139219		87.6	0.0117683	0.00999857	0.0163026	0.0174981	0.0221812	0.025062			87.6	0.0195246	0.0480853	0.0835272	0.11664	0.115297	0.105153		87.6	0.0019987	0.00681734	0.00448328
				87.8	0.0349765	0.0643515	0.101642	0.118586	0.125181	0.151193		87.8	0.00943421	0.0126417	0.0116087	0.0155838	0.0185568	0.0197738			87.8	0.0301948	0.0515443	0.0902946	0.122932	0.143408	0.138736		87.8	0.0124741	0.0100399	0.0153034	0.0176446	0.0218262	0.0245621			87.8	0.0193853	0.0490551	0.0843166	0.117458	0.11579	0.104792		87.8	0.00071551	0.0075387	0.00461349
				88	0.0349962	0.06387	0.102059	0.118532	0.124998	0.150807		88	0.00977874	0.0120427	0.0114115	0.0155721	0.0188463	0.0198751			88	0.0303193	0.0519047	0.0907897	0.123328	0.144141	0.137433		88	0.0126766	0.00944724	0.0160013	0.0182652	0.0215164	0.0239163			88	0.019611	0.0505692	0.0839715	0.117684	0.115579	0.104769		88	0.00090729	0.00753544	0.0028974
				88.2	0.0351271	0.0629515	0.102254	0.119416	0.125026	0.15113		88.2	0.0110047	0.0113054	0.0117785	0.015157	0.018607	0.0203132			88.2	0.0308212	0.0521247	0.0906198	0.123797	0.144367	0.136642		88.2	0.0126802	0.00948135	0.0161007	0.0176079	0.0216048	0.0233448			88.2	0.0186482	0.0516899	0.0834726	0.118502	0.115646	0.105407		88.2	0.00027478	0.0072958	0.00257
				88.4	0.035257	0.062258	0.102283	0.119715	0.125078	0.150512		88.4	0.0116008	0.011957	0.0108731	0.014974	0.0188526	0.020986			88.4	0.0311767	0.0526295	0.0913028	0.124636	0.14367	0.13635		88.4	0.0128304	0.00899009	0.0163658	0.0174406	0.0222126	0.0235357			88.4	0.0179003	0.0522035	0.0824194	0.118921	0.115712	0.104725		88.4	0.00122525	0.00729928	0.00152284
				88.6	0.0346547	0.0620186	0.102505	0.120584	0.125057	0.150728		88.6	0.0121519	0.0123829	0.0106003	0.0153464	0.0191485	0.0216812			88.6	0.0317019	0.0536164	0.0918533	0.124729	0.14315	0.136086		88.6	0.0134841	0.00868713	0.0168182	0.0163869	0.0225246	0.0226274											88.6	0.00142601	0.00721604	0.00182249
				88.8	0.0344044	0.0612679	0.10175	0.121518	0.125812	0.150895		88.8	0.0120938	0.0127294	0.0110421	0.0149643	0.0191854	0.0222342			88.8	0.0311326	0.0539157	0.0927053	0.124978	0.143541	0.136237		88.8	0.0142862	0.00806197	0.0171737	0.0158934	0.0216553	0.0224087											88.8	0.00212124	0.00788031	0.00151921
				89	0.034408	0.060543	0.101869	0.121472	0.124952	0.150208		89	0.0121207	0.0128085	0.0115968	0.0144106	0.0192219	0.022065			89	0.0305402	0.0539947	0.0939726	0.12486	0.143301	0.1		89	0.013684	0.00825163	0.0171323	0.0159987	0.0215973	0.0217026											89	0.00236353	0.00744922	0.00185694
												89.2	0.0127585	0.0126323	0.011595	0.014712	0.0197159	0.0217391											89.2	0.0129024	0.00822204	0.0171112	0.0163294	0.0214966	0.0210023											89.2	0.00262564	0.00673337	0.00192563
												89.4	0.0142132	0.0117567	0.0117759	0.0137356	0.0192917	0.0213696											89.4	0.0119894	0.00833158	0.0167156	0.0166411	0.0224615	0.0210142											89.4	0.00238347	0.00538978	0.00200177
												89.6	0.0146059	0.0110346	0.0118998	0.0135149	0.0183198	0.0216221											89.6	0.0110166	0.00890049	0.0169822	0.0160341	0.0235469	0.0213691											89.6	0.00327738	0.00488167	0.00258771
												89.8	0.0150107	0.0109488	0.0120096	0.0131102	0.0183369	0.0211471											89.8	0.0114436	0.00906257	0.0164421	0.0162568	0.023044	0.0216833											89.8	0.004019	0.00459833	0.00171472
												90	0.0147826	0.0113156	0.0125496	0.0134526	0.0179478	0.0213782											90	0.0106146	0.00849957	0.0170529	0.0157424	0.0223725	0.0219473											90	0.00345206	0.004108	0.00071559
												90.2	0.0151723	0.0120033	0.0121323	0.014121	0.0187295	0.0204302											90.2	0.0103867	0.00812117	0.0167229	0.015309	0.0215407	0.0218172											90.2	0.00285533	0.00403947	0.00102379
												90.4	0.0147793	0.0118848	0.0127743	0.0142022	0.018867	0.0197582											90.4	0.00880651	0.00868849	0.0160545	0.0152873	0.0208675	0.021508											90.4	0.00260671	0.00505436	0.00126965
												90.6	0.013649	0.0118067	0.0130487	0.0143852	0.0187018	0.0195925											90.6	0.00783438	0.00984819	0.0153717	0.0145291	0.0204125	0.02176											90.6	0.00298048	0.0045945	0.00045511
												90.8	0.0131768	0.0111246	0.0126255	0.0149301	0.0180735	0.0192165											90.8	0.00650846	0.00955462	0.0154687	0.0153436	0.0201145	0.0226405											90.8	0.00314287	0.00346992	0.00141493
												91	0.0115225	0.0110391	0.0119751	0.0165144	0.0179461	0.0191648											91	0.00652459	0.0104346	0.0138708	0.0155332	0.0199168	0.0225456											91	0.0044412	0.0037919	0.00151801
												91.2	0.0108666	0.0112741	0.0118896	0.0176294	0.018434	0.0198317											91.2	0.00679337	0.0110102	0.0130562	0.0154162	0.0189332	0.0233276											91.2	0.00473803	0.00405532	0.00158316
												91.4	0.010836	0.0116211	0.0126426	0.017595	0.0183001	0.0193194											91.4	0.00646848	0.0119817	0.0136651	0.0150232	0.0187492	0.0232189											91.4	0.00439014	0.00535275	0.00293665
												91.6	0.00945871	0.0114946	0.0129093	0.0176812	0.0177175	0.020495											91.6	0.00637914	0.0131321	0.013445	0.0149938	0.0180898	0.0232793											91.6	0.00343678	0.0058848	0.00283681
												91.8	0.00919666	0.0108822	0.0128261	0.0172551	0.016639	0.0211123											91.8	0.00617763	0.0133681	0.0134637	0.0157737	0.0174727	0.0237937											91.8	0.0033259	0.00479356	0.00332624
												92	0.0100134	0.0106787	0.0132829	0.0168968	0.0172298	0.0210547											92	0.00638466	0.012978	0.0142683	0.0164863	0.0176384	0.0244161											92	0.00249439	0.0050442	0.00258656
												92.2	0.0115592	0.0112312	0.0133701	0.0166562	0.0171473	0.0215365											92.2	0.00713274	0.0126897	0.0150775	0.0158264	0.0183797	0.023819											92.2	0.00100465	0.00470266	0.003705
												92.4	0.0109805	0.0120554	0.0128136	0.0164605	0.0165984	0.0215119											92.4	0.00658244	0.0125917	0.0153793	0.0171791	0.0183559	0.0236105											92.4	0.00133265	0.0052663	0.00363379
												92.6	0.0102078	0.0123945	0.0130553	0.0170461	0.0160589	0.022053											92.6	0.00816718	0.0122115	0.0155724	0.0175497	0.0184451	0.0232194											92.6	5.21E-02	0.00590492	0.00386668
												92.8	0.0102448	0.0123146	0.0135192	0.0165611	0.0154016	0.0219284											92.8	0.00841798	0.01255	0.0156068	0.0176958	0.0190172	0.0229217											92.8	0.00035695	0.00557826	0.00369684
												93	0.0109332	0.0125454	0.0133113	0.0157055	0.0140661	0.0219652											93	0.00896534	0.0125787	0.0156349	0.0181362	0.0192381	0.022535											93	0.00015975	0.00389495	0.0045921
												93.2	0.011718	0.0131145	0.0131193	0.0149963	0.0133731	0.0212646											93.2	0.0101399	0.0126126	0.0153005	0.0185904	0.0197103	0.0227291											93.2	-0.00091582	0.00379134	0.00425103
												93.4	0.0132937	0.0125682	0.0135645	0.0144142	0.0136478	0.0216144											93.4	0.0108092	0.0115222	0.0149193	0.0185736	0.0202108	0.0227759											93.4	-0.00096085	0.00414202	0.00468846
												93.6	0.0137157	0.0138612	0.0136954	0.0152162	0.0135271	0.0218098											93.6	0.0124683	0.0103805	0.0146161	0.0183233	0.0201144	0.0234984											93.6	-0.00075497	0.00458253	0.00406465
												93.8	0.0136289	0.0141946	0.0143799	0.0154324	0.0139945	0.0213087											93.8	0.0137494	0.00918969	0.0138695	0.0184701	0.0184756	0.0249826											93.8	-0.0012162	0.00332096	0.00373594
												94	0.0144254	0.0146331	0.0151918	0.0160059	0.0139876	0.0208102											94	0.0134654	0.0087394	0.0128317	0.0182006	0.0179618	0.0254193											94	-0.00169748	0.00284425	0.00296382
												94.2	0.0151912	0.0142115	0.0148939	0.0158016	0.0157643	0.0195506											94.2	0.0133319	0.00817052	0.0125913	0.0176507	0.0174734	0.0251163											94.2	-0.00147581	0.00316613	0.00370932
												94.4	0.0140898	0.013421	0.0142656	0.0160547	0.0164159	0.0197093											94.4	0.0123039	0.00857495	0.0120726	0.0177089	0.0173464	0.0252213											94.4	-0.00086663	0.00446645	0.00356415
												94.6	0.0138293	0.0140075	0.0137943	0.0159475	0.0173867	0.0199144											94.6	0.012295	0.00925984	0.0116614	0.0175152	0.0186978	0.0246737											94.6	0.00012221	0.00395902	0.00340859
												94.8	0.0141923	0.0146068	0.0136046	0.0165782	0.0173454	0.0196866											94.8	0.0120098	0.00873906	0.0118212	0.0169495	0.0183158	0.0252896											94.8	0.00160918	0.00410035	0.00524791
												95	0.013453	0.014499	0.0138303	0.0165849	0.0178826	0.0209926											95	0.0121728	0.00961849	0.00957619	0.0160108	0.0181619	0.0253559											95	0.00265403	0.00526649	0.00434289
												95.2	0.0137928	0.0143339	0.0138419	0.0162919	0.0189493	0.0213989											95.2	0.0109417	0.00972151	0.00972793	0.0154909	0.0179494	0.0255667											95.2	0.00148546	0.00631066	0.00493586
												95.4	0.014043	0.0140034	0.0141799	0.0152211	0.0188239	0.0208951											95.4	0.010236	0.00957493	0.0104766	0.0148411	0.0179121	0.0254176											95.4	0.00045096	0.00755489	0.00496574
												95.6	0.0130545	0.0140806	0.0134736	0.01451	0.0188366	0.0213821											95.6	0.0101288	0.0102407	0.0104061	0.0148495	0.0176591	0.0253625											95.6	0.0006502	0.00758463	0.0045573
												95.8	0.0141553	0.0133191	0.0132435	0.0135527	0.0194302	0.0218212											95.8	0.010222	0.0101372	0.0101207	0.0157133	0.0185904	0.0252743											95.8	2.9e-05	0.00702317	0.00500882
												96	0.0142624	0.0127666	0.0132192	0.0133106	0.0191033	0.0217722											96	0.00953544	0.0104129	0.0105178	0.0161746	0.0192004	0.0242239											96	-0.00025751	0.00836522	0.00526082
												96.2	0.0135319	0.0127176	0.0130513	0.0134452	0.0182382	0.0221433											96.2	0.00918908	0.0116001	0.0107938	0.0162108	0.0185163	0.0230443											96.2	0.00122784	0.00947753	0.00543147
												96.4	0.0117503	0.0131527	0.0127796	0.013662	0.0185128	0.0222308											96.4	0.00867263	0.0113503	0.0115885	0.016931	0.0185195	0.0229506											96.4	0.00132568	0.0104033	0.00531136
												96.6	0.0111882	0.0121305	0.0116723	0.0140871	0.0194089	0.0231095											96.6	0.00893021	0.011299	0.0126313	0.0161684	0.0187108	0.0229999											96.6	0.00069127	0.00988374	0.00532777
												96.8	0.0108178	0.0119266	0.0110956	0.0137915	0.0189614	0.0228743											96.8	0.00885377	0.0114199	0.0140864	0.0162887	0.0188251	0.0228425											96.8	0.0022392	0.00944208	0.00468965
												97	0.0103645	0.0119987	0.0101953	0.0138741	0.0185527	0.0227759											97	0.00951428	0.0110968	0.015059	0.0159922	0.018385	0.0227896											97	0.00051253	0.00989273	0.00517966
												97.2	0.0105643	0.0126059	0.0103425	0.0145565	0.018484	0.0220274											97.2	0.0101109	0.0124148	0.0152365	0.0150155	0.0190631	0.0221741											97.2	0.00091322	0.00995467	0.00467096
												97.4	0.00995964	0.012291	0.010843	0.0162052	0.0187063	0.0218519											97.4	0.010247	0.011649	0.0160407	0.0142464	0.018097	0.0226201											97.4	0.00145105	0.00834402	0.00438815
												97.6	0.00961311	0.0119373	0.0109305	0.0163048	0.0178728	0.0209732											97.6	0.0110921	0.0115826	0.016625	0.0142173	0.0171046	0.0234704											97.6	0.0014496	0.00732807	0.00327462
												97.8	0.00903285	0.0111125	0.0116251	0.016055	0.0171687	0.0200597											97.8	0.0110449	0.0119034	0.0167094	0.0128766	0.0165992	0.0233863											97.8	0.00095929	0.00594371	0.00344147
												98	0.00918229	0.0108199	0.0113704	0.0169421	0.0174605	0.0197046											98	0.0114652	0.0122859	0.0178716	0.0119906	0.0173827	0.0229961											98	0.00103159	0.00634454	0.00235152
												98.2	0.00857104	0.0110458	0.0108272	0.0167747	0.0175518	0.0190481											98.2	0.0120865	0.0123981	0.0184413	0.0121932	0.0172096	0.022932											98.2	0.00082452	0.0076893	0.00224431
												98.4	0.00762042	0.0111501	0.0111977	0.0171754	0.0171611	0.0188539											98.4	0.011536	0.0131819	0.0182276	0.0125905	0.0185154	0.0229747											98.4	0.00087077	0.00745003	0.00271573
												98.6	0.00851966	0.012593	0.0115601	0.017431	0.0173498	0.0187553											98.6	0.0110368	0.0133542	0.0173521	0.0127711	0.0196453	0.0231845											98.6	0.00065576	0.00644992	0.00282956
												98.8	0.00925181	0.0131027	0.0114038	0.0172766	0.0167584	0.0183193											98.8	0.0104237	0.0128859	0.0160862	0.0120539	0.0189104	0.0231642											98.8	0.0004071	0.0071066	0.00222247
												99	0.00837582	0.0135828	0.0108022	0.0174178	0.0165159	0.0188534											99	0.010619	0.0127181	0.0147267	0.0127455	0.0188014	0.0233347											99	-0.00102015	0.00741607	0.00163278
												99.2	0.00886325	0.0136528	0.0116506	0.0175961	0.0164678	0.018094											99.2	0.010444	0.0124719	0.0134884	0.0139495	0.0191433	0.0237679											99.2	-0.00159109	0.00810232	0.00175461
												99.4	0.00962538	0.0133384	0.0113796	0.0179157	0.0165358	0.0179434											99.4	0.0110022	0.0125071	0.0119851	0.0138379	0.0184611	0.0241684											99.4	-0.001461	0.00817293	0.00214177
												99.6	0.00939794	0.0136047	0.0116537	0.0182837	0.0166621	0.0179364											99.6	0.0114773	0.0132264	0.0105803	0.014538	0.018063	0.0247812											99.6	-0.00099675	0.00815106	0.00259325
												99.8	0.0106654	0.0124112	0.0117642	0.0182249	0.0163475	0.0180533											99.8	0.0108315	0.0127713	0.00926757	0.0158955	0.0180251	0.0248417											99.8	-0.00109356	0.00866423	0.00265808
												100	0.0105088	0.0135783	0.0106477	0.0193005	0.0156637	0.0183501											100	0.010011	0.0132969	0.00877445	0.0155234	0.0177635	0.0245808											100	-0.0010306	0.00828255	0.00215738
												100.2	0.010667	0.0137484	0.00968713	0.019304	0.0164858	0.0184364											100.2	0.0111579	0.0130992	0.00918693	0.0155188	0.0175747	0.0245852											100.2	-0.0005601	0.00909719	0.002452
												100.4	0.0111184	0.0138147	0.00936106	0.0196112	0.0176124	0.0184106											100.4	0.0110173	0.0122122	0.00919896	0.0154649	0.0174176	0.0249038											100.4	-0.00163929	0.0090498	0.00085526
												100.6	0.0119399	0.0127253	0.00830806	0.0193034	0.0175696	0.0188305											100.6	0.0111565	0.0126277	0.00851241	0.0153198	0.0170561	0.0247592											100.6	-0.00093204	0.0084298	0.00068502
												100.8	0.0111901	0.0128046	0.00832193	0.0188797	0.0168021	0.0177548											100.8	0.0112741	0.0133603	0.00815077	0.0151072	0.016562	0.0244602											100.8	0.00064393	0.00844737	-0.00025452
												101	0.0114	0.0125446	0.00885063	0.0187791	0.0164384	0.0180969											101	0.0110694	0.0139908	0.00800518	0.0138205	0.0165198	0.0238398											101	-0.00045498	0.00805423	-0.00057009
												101.2	0.0119647	0.0120239	0.00954559	0.0190785	0.0160558	0.0180406											101.2	0.0108331	0.0142844	0.00923499	0.0128569	0.0162766	0.0232042											101.2	0.00131652	0.00684722	-0.00083507
												101.4	0.011822	0.0112136	0.0100696	0.0185449	0.0158347	0.0179175											101.4	0.0101491	0.0135304	0.0103712	0.0124117	0.0148887	0.0240346											101.4	0.00107341	0.00664273	-0.00155115
												101.6	0.0129367	0.00955859	0.0104051	0.0175981	0.0161577	0.0185389											101.6	0.0102529	0.0133412	0.0116895	0.0120102	0.0162956	0.0222681											101.6	0.00013076	0.00632319	-0.00133453
												101.8	0.0126943	0.00924648	0.010896	0.0173751	0.0156182	0.0193789											101.8	0.0106374	0.0139017	0.0136743	0.0111918	0.0165739	0.0221496											101.8	-0.00082481	0.0070154	-0.00132074
												102	0.0125788	0.00963788	0.0115906	0.017526	0.0159084	0.0207319											102	0.0113214	0.0148673	0.0155135	0.0115556	0.016977	0.0214995											102	-0.00097834	0.00804115	-0.00222667
												102.2	0.01206	0.00970748	0.0113945	0.0170114	0.0150637	0.021244											102.2	0.0108258	0.0150169	0.0159291	0.012512	0.0170685	0.0215157											102.2	-0.00053436	0.00878774	-0.00200239
												102.4	0.0112594	0.00913283	0.0127681	0.017362	0.015744	0.0213162											102.4	0.00940124	0.0144171	0.0162069	0.0118653	0.018419	0.0214773											102.4	1.27E-02	0.00868214	-0.00291543
												102.6	0.0118576	0.00963923	0.012489	0.0168725	0.01604	0.0212558											102.6	0.00841889	0.0132905	0.016459	0.0117145	0.0185866	0.021048											102.6	0.00036794	0.00956054	-0.00265673
												102.8	0.0118251	0.00931231	0.0135559	0.0168296	0.0155804	0.0213099											102.8	0.00759778	0.0129193	0.0177044	0.0116181	0.0191641	0.0196674											102.8	0.00062015	0.0104394	-0.00247237
												103	0.0100022	0.00895223	0.0135039	0.016738	0.0161032	0.0214941											103	0.0080424	0.012445	0.0182625	0.0125513	0.0195001	0.0197026											103	2.54e-06	0.0104389	-0.00160304
												103.2	0.0106583	0.00855526	0.0148097	0.017236	0.0165303	0.0206555											103.2	0.00820129	0.0117065	0.017874	0.0122809	0.0190652	0.0193526											103.2	0.00069509	0.0107078	-3.92E-02
												103.4	0.010549	0.0087217	0.0138227	0.0171831	0.0164343	0.0206115											103.4	0.00710928	0.0109674	0.0184226	0.0125094	0.0177457	0.0195941											103.4	0.00048692	0.010456	0.00111123
												103.6	0.0106834	0.0096408	0.013393	0.0166639	0.0167	0.0209759											103.6	0.00797108	0.00944468	0.0186839	0.0126281	0.017361	0.0205657											103.6	0.00035416	0.0110945	0.00215726
												103.8	0.0103719	0.00991833	0.0125159	0.0161515	0.0164443	0.0204741											103.8	0.00827065	0.00898704	0.0187549	0.013759	0.0166746	0.0198869											103.8	-0.00022291	0.0106725	0.00208266
												104	0.00924742	0.0113589	0.0112383	0.0165197	0.0174739	0.0208259											104	0.00857756	0.00876361	0.0187775	0.0138206	0.0164949	0.0201118											104	7.91E-02	0.00917136	0.00116565
												104.2	0.00881276	0.0111299	0.0109092	0.0153802	0.0187296	0.0196442											104.2	0.00939327	0.00838038	0.0177012	0.014383	0.0154544	0.0204437											104.2	0.00024883	0.0102962	0.00166513
												104.4	0.00892003	0.011708	0.0108306	0.0142969	0.0184819	0.0198046											104.4	0.0095461	0.00839559	0.0160632	0.015099	0.0140932	0.020294											104.4	0.00070196	0.0102238	0.00083469
												104.6	0.00856266	0.0112611	0.010568	0.014025	0.0175051	0.0202801											104.6	0.0106344	0.0091456	0.0145004	0.0146482	0.0148408	0.0199194											104.6	0.0022825	0.00849664	0.00258282
												104.8	0.00762678	0.0116184	0.011042	0.014304	0.0171073	0.0202642											104.8	0.0109528	0.00976521	0.0136585	0.014913	0.0144553	0.0204107											104.8	0.002849	0.00826479	0.00168598
												105	0.00873079	0.0116229	0.0113534	0.0147882	0.0171589	0.0210101											105	0.0114881	0.00963886	0.0130128	0.0150566	0.0147405	0.0210046											105	0.00106055	0.00757763	0.00158574
												105.2	0.00961871	0.0111844	0.0104723	0.0146468	0.0178911	0.0210763											105.2	0.0123362	0.00966758	0.013413	0.0161286	0.0150858	0.0210803											105.2	0.00059138	0.00717601	0.00164437
												105.4	0.00984728	0.0115091	0.0106403	0.01463	0.0177351	0.0212036											105.4	0.0123579	0.00962293	0.0125773	0.0162254	0.016446	0.0221501											105.4	-0.00015291	0.00612013	0.00107851
												105.6	0.0111483	0.0116935	0.0110199	0.0151001	0.0175881	0.0214479											105.6	0.0126253	0.0104177	0.0120723	0.0166914	0.018219	0.0215435											105.6	-0.00072409	0.00537111	0.00151761
												105.8	0.0115321	0.0127615	0.0108722	0.0145317	0.0165711	0.0217173											105.8	0.0123766	0.011102	0.0117554	0.0170998	0.0184865	0.0219692											105.8	-0.00038237	0.00651696	0.00053579
												106	0.0110594	0.012268	0.0105397	0.014687	0.0159022	0.0224715											106	0.0124959	0.0122418	0.0120467	0.0171254	0.0189348	0.0217751											106	0.00067186	0.00636666	0.00071975
												106.2	0.0113999	0.0120614	0.00957446	0.014689	0.0159111	0.0222847											106.2	0.0119264	0.0125286	0.0121854	0.0166132	0.0198596	0.0220797											106.2	0.00049055	0.005916	0.00079588
												106.4	0.0116976	0.0119601	0.0106085	0.0150886	0.0155485	0.0214755											106.4	0.0110131	0.0127255	0.0127151	0.0150988	0.020297	0.021883											106.4	0.00078595	0.00576914	0.00127362
												106.6	0.0129111	0.0124949	0.0102579	0.0144516	0.0158692	0.0214335											106.6	0.0112525	0.0127369	0.0135368	0.0152749	0.0198569	0.0209425											106.6	0.00115421	0.00520405	0.00277404
												106.8	0.0130004	0.0131539	0.0112864	0.0148662	0.0168495	0.0205826											106.8	0.0107058	0.0131001	0.0138031	0.0155223	0.0203654	0.0205746											106.8	-0.00035778	0.00481132	0.00281074
												107	0.0127394	0.0124705	0.0104875	0.0142301	0.016416	0.0197691											107	0.0104712	0.0118536	0.014156	0.0156339	0.0196521	0.0201021											107	-8.29E-02	0.00420423	0.00294187
												107.2	0.0133548	0.012762	0.010825	0.0149833	0.0160126	0.0196547											107.2	0.0101544	0.0113859	0.0146158	0.0153354	0.0185729	0.0200914											107.2	0.00050532	0.00486304	0.00440739
												107.4	0.0125039	0.0126397	0.00939932	0.0144734	0.0160554	0.0203199											107.4	0.0092822	0.0110587	0.0145334	0.0165072	0.0176653	0.0203721											107.4	2.52E-02	0.00549547	0.00414879
												107.6	0.0130032	0.0133329	0.00902677	0.0136755	0.0171565	0.0199115											107.6	0.00995105	0.00972702	0.0148512	0.0161954	0.0171252	0.0211856											107.6	-0.00042901	0.00604791	0.00400525
												107.8	0.012055	0.0126644	0.00889382	0.0134719	0.0180647	0.0184203											107.8	0.00967301	0.00909171	0.0157268	0.0175898	0.0165786	0.0204537											107.8	-0.00010933	0.00613286	0.00296842
												108	0.0116769	0.0133568	0.00825814	0.0136653	0.019269	0.0183617											108	0.00925547	0.00819715	0.0155115	0.0177279	0.0164309	0.0204109											108	0.00046118	0.00607289	0.00175484
												108.2	0.0107196	0.0136569	0.00794245	0.0132204	0.0194825	0.0180574											108.2	0.00940391	0.00796223	0.0144073	0.0172306	0.0151973	0.0205448											108.2	-0.00070506	0.00807471	0.00227341
												108.4	0.0109923	0.0142101	0.0078986	0.0132022	0.0183616	0.0192178											108.4	0.0100244	0.00798945	0.0143498	0.0170142	0.0155679	0.0197305											108.4	0.000155	0.00852432	0.00137429
												108.6	0.0100848	0.0132985	0.0081215	0.0135995	0.0182335	0.0195639											108.6	0.0101176	0.00823591	0.0141888	0.0160609	0.0165859	0.0207294											108.6	-0.00026201	0.00840797	0.00206376
												108.8	0.00938028	0.0138374	0.00786171	0.0139113	0.0187659	0.0204139											108.8	0.0103124	0.00809748	0.0137709	0.0165885	0.0162007	0.0214775											108.8	-0.0016539	0.00923366	0.00043741
												109	0.0104802	0.0134851	0.00764503	0.0138289	0.0188957	0.019051											109	0.0103041	0.0078043	0.0135183	0.0166235	0.0166593	0.0221407											109	-0.00247004	0.00931066	1.56E-02
												109.2	0.0105099	0.0132792	0.00734696	0.0138137	0.0188517	0.0186751											109.2	0.00998481	0.00682843	0.0133963	0.0166806	0.0170134	0.0223123											109.2	-0.00187344	0.00975608	-0.00076842
												109.4	0.0111109	0.0131066	0.00816164	0.0141378	0.0185938	0.0193497											109.4	0.00958366	0.0070148	0.0134566	0.0159743	0.016835	0.0227097											109.4	-0.00206001	0.011331	-0.00029658
												109.6	0.0111188	0.0138443	0.00926701	0.0136678	0.017534	0.0190827											109.6	0.00949806	0.00762767	0.0122083	0.0155379	0.0165678	0.0219309											109.6	-0.00121471	0.0120926	-0.00016857
												109.8	0.010231	0.0131841	0.009604	0.0128409	0.0161225	0.0188241											109.8	0.0101962	0.0078435	0.012154	0.0149015	0.016192	0.0214149											109.8	-0.00011312	0.0129503	-0.00091921
												110	0.00940135	0.0125648	0.00977139	0.0132643	0.0156906	0.0190359											110	0.0106922	0.00907038	0.0126412	0.0139098	0.0147013	0.0210701											110	-0.00041629	0.0129902	0.00062631
												110.2	0.00948561	0.0131809	0.00965243	0.0129332	0.0158396	0.0198358											110.2	0.0101291	0.0101055	0.0130905	0.0127112	0.0143676	0.0203386											110.2	-0.00135278	0.0130767	0.00061074
												110.4	0.00916238	0.0131167	0.0109987	0.0125767	0.0156428	0.0196022											110.4	0.0106907	0.0104159	0.0132967	0.0124914	0.0141557	0.0201908											110.4	-6.94E-02	0.0120024	0.00098239
												110.6	0.00861233	0.0139466	0.0114624	0.0123478	0.0163327	0.0191838											110.6	0.011226	0.0102105	0.0131079	0.0126135	0.0148027	0.0196386											110.6	0.00013725	0.0116936	0.00026795
												110.8	0.00917134	0.0144297	0.0119278	0.0128514	0.0160356	0.0194137											110.8	0.0103094	0.010895	0.0130151	0.0127915	0.0158453	0.0198071											110.8	-3.57E-02	0.0114294	0.00012594
												111	0.00985368	0.0134489	0.0118961	0.0133827	0.0151608	0.0196062											111	0.0102636	0.0105	0.0134708	0.0124926	0.0162187	0.0200374											111	0.00085577	0.0111641	-0.0003632
												111.2	0.00961479	0.0134807	0.0117965	0.013978	0.015886	0.0200386											111.2	0.00972028	0.0110016	0.0131444	0.0124703	0.0172579	0.0203624											111.2	0.00115412	0.0105142	-0.00030314
												111.4	0.0102399	0.0128371	0.0115432	0.0135489	0.0154202	0.0200061											111.4	0.00942676	0.0109982	0.0134126	0.0124708	0.0173994	0.0211481											111.4	0.0013553	0.0104227	-0.00044666
												111.6	0.0117738	0.0130684	0.0110244	0.0142091	0.0154629	0.0191262											111.6	0.00890992	0.0111894	0.0139927	0.0124766	0.0177086	0.0211887											111.6	0.00133943	0.00925127	-0.00040705
												111.8	0.0120595	0.0121576	0.0110899	0.0147683	0.0150868	0.0183503											111.8	0.00893261	0.0109639	0.0144401	0.0135446	0.0186177	0.0212555											111.8	0.00084028	0.00825095	-0.00047632
												112	0.0113221	0.0125534	0.0110893	0.014932	0.0145717	0.0188609											112	0.00855374	0.0119137	0.0142025	0.0137332	0.0182391	0.0211074											112	0.00033856	0.00694726	-0.00026589
												112.2	0.0107588	0.0117964	0.0105901	0.0148828	0.0145349	0.019596											112.2	0.0087184	0.0118983	0.0133207	0.01388	0.0182574	0.0212207											112.2	-0.00107851	0.00672146	0.0003758
												112.4	0.011348	0.0118806	0.0101739	0.0142144	0.0141248	0.0197328											112.4	0.00969555	0.012174	0.0133241	0.0145404	0.019339	0.021604											112.4	-0.00061171	0.00567357	0.00015844
												112.6	0.0104714	0.0115946	0.00913995	0.0153596	0.0142214	0.0199297											112.6	0.00973575	0.0119538	0.0126347	0.0144461	0.0198294	0.0225392											112.6	-0.00146508	0.00435226	0.00189762
												112.8	0.0104281	0.0124261	0.00948454	0.0159563	0.0146762	0.020483											112.8	0.0102492	0.0121082	0.0116428	0.0144684	0.0201681	0.021907											112.8	-0.00070585	0.00369573	0.00146409
												113	0.0111755	0.0122358	0.0100015	0.0172977	0.0150912	0.0197284											113	0.0106082	0.0122944	0.0122822	0.0153669	0.0198367	0.0222095											113	-0.00068717	0.00380267	0.00171419
												113.2	0.0117887	0.0121031	0.0100572	0.0181362	0.0149257	0.020597											113.2	0.0112703	0.0115045	0.0124411	0.0147851	0.0196501	0.021588											113.2	-0.00035363	0.00407847	0.00273296
												113.4	0.0115978	0.0125704	0.010004	0.0173695	0.0151371	0.0202507											113.4	0.0117742	0.0118073	0.0134242	0.0140169	0.0191901	0.021883											113.4	-0.0011828	0.00530269	0.00368115
												113.6	0.0110178	0.0130819	0.0101329	0.0174659	0.0139566	0.0199854											113.6	0.0125879	0.0114184	0.0135474	0.0136291	0.0190448	0.0214693											113.6	-0.00101816	0.00510286	0.00364574
												113.8	0.0106678	0.0120707	0.0103945	0.0165821	0.0143199	0.0198901											113.8	0.0124708	0.0114558	0.0144159	0.0137255	0.0177784	0.021621											113.8	-0.00149916	0.00572619	0.00366383
												114	0.0104551	0.0129476	0.0101521	0.0165113	0.0151898	0.0203716											114	0.0117737	0.0126735	0.0145778	0.0128351	0.0165913	0.0206354											114	-0.00290959	0.00646951	0.00450347
												114.2	0.0102048	0.012985	0.0105291	0.0153558	0.0151491	0.021053											114.2	0.0116562	0.0133197	0.0161972	0.0126597	0.0173044	0.0209191											114.2	-0.00319532	0.00680477	0.00409422
												114.4	0.0098867	0.0139537	0.0103863	0.0159643	0.01571	0.0202777											114.4	0.012615	0.0123143	0.0162668	0.0135427	0.0180814	0.0214135											114.4	-0.00334763	0.00633087	0.00400523
												114.6	0.010243	0.0138797	0.0103399	0.0161917	0.0156914	0.0203957											114.6	0.0120744	0.0116678	0.0166442	0.0131812	0.0187169	0.0215254											114.6	-0.00276956	0.00700019	0.00436392
												114.8	0.0110067	0.0131816	0.0100442	0.016042	0.0154624	0.0216402											114.8	0.0109122	0.0118555	0.0164117	0.0128294	0.0197646	0.0218642											114.8	-0.00236211	0.00678318	0.00374906
												115	0.0118069	0.0121761	0.0101809	0.0159228	0.0147323	0.021402											115	0.0107317	0.0108614	0.0165266	0.0119998	0.0197886	0.0222339											115	-0.00146197	0.00730006	0.0038425
												115.2	0.0123689	0.0118093	0.00959946	0.0146175	0.0152978	0.0218265											115.2	0.0103059	0.0107335	0.0164619	0.0110322	0.0195864	0.0218004											115.2	-0.0002235	0.0070798	0.00268293
												115.4	0.0127182	0.0110485	0.00999749	0.0139713	0.014072	0.0218804											115.4	0.0100333	0.0110401	0.017042	0.0119174	0.0187349	0.0225066											115.4	0.0012313	0.00795758	0.00211148
												115.6	0.0125068	0.0107716	0.0103753	0.0133623	0.0141532	0.0215022											115.6	0.00919348	0.0111796	0.0168615	0.0121553	0.0182866	0.0217237											115.6	0.00077468	0.00759265	0.00192356
												115.8	0.0117223	0.00979101	0.0103079	0.013122	0.0144314	0.0209483											115.8	0.00933208	0.00989892	0.0164478	0.01254	0.0178644	0.0221407											115.8	0.00088069	0.00775234	0.00158847
												116	0.0100313	0.00939617	0.0101338	0.0128628	0.014441	0.0209539											116	0.00939341	0.0100055	0.0148867	0.0126459	0.0176171	0.0214932											116	0.00130133	0.0075686	0.00080842
												116.2	0.00922717	0.00871332	0.00970451	0.0133071	0.0144201	0.0204306											116.2	0.00972933	0.00976596	0.0138918	0.0127543	0.017857	0.0224594											116.2	0.00055837	0.00719577	0.00010724
												116.4	0.00825463	0.0091672	0.0089861	0.0137398	0.0138182	0.020393											116.4	0.0101489	0.00982627	0.0140361	0.0121306	0.0182497	0.0223177											116.4	0.00119392	0.00782586	-0.00119126
												116.6	0.00774507	0.00896833	0.00897677	0.0151865	0.0142744	0.0204243											116.6	0.00904316	0.00968002	0.0129037	0.0117358	0.0184583	0.0224691											116.6	0.00174684	0.00785925	-0.00115045
												116.8	0.00729264	0.00901043	0.00894612	0.0150303	0.0145093	0.0210958											116.8	0.00929715	0.0100437	0.0132526	0.0117874	0.0196464	0.0214831											116.8	0.00241598	0.00783125	-0.00232353
												117	0.00720573	0.00913041	0.00911605	0.0160559	0.014999	0.021211											117	0.00863322	0.0105381	0.0141135	0.0119626	0.0200639	0.0217989											117	0.00085436	0.00757845	-0.00225343
												117.2	0.00697776	0.00896994	0.00857223	0.0158961	0.0147346	0.0208797											117.2	0.00867137	0.0105045	0.0143117	0.0109648	0.0204522	0.0216132											117.2	0.00033319	0.00668804	-0.00255166
												117.4	0.00570696	0.00907799	0.00786039	0.0147614	0.0145609	0.0199797											117.4	0.00886336	0.0106451	0.0150991	0.0112128	0.0200976	0.0216192											117.4	-0.00061646	0.00659331	-0.00243861
												117.6	0.00561615	0.00931696	0.0074427	0.01558	0.0139051	0.0199571											117.6	0.00867649	0.0108636	0.016153	0.0113869	0.0193979	0.0218539											117.6	-0.00067264	0.00623507	-0.00235558
												117.8	0.0059319	0.00965001	0.00727025	0.0148136	0.0149234	0.0195323											117.8	0.00764185	0.0123626	0.0155726	0.0118737	0.0181258	0.0227462											117.8	-0.00113993	0.00529632	-0.00268219
												118	0.00605588	0.0106142	0.00723055	0.0152475	0.0143104	0.0190013											118	0.00766634	0.0126754	0.0155984	0.0110358	0.0182086	0.0224788											118	-0.0021995	0.0057652	-0.00124836
												118.2	0.00623413	0.0102286	0.00697264	0.0160978	0.013803	0.0194473											118.2	0.00784958	0.0126195	0.0158758	0.0119094	0.0181776	0.0231848											118.2	-0.00288793	0.00539542	-0.00057209
												118.4	0.00671842	0.0104624	0.00621084	0.0171587	0.0142341	0.018927											118.4	0.00843512	0.011143	0.0148632	0.0124721	0.0178524	0.0230926											118.4	-0.00285081	0.00458092	-4.74E-02
												118.6	0.00672666	0.0107794	0.00717921	0.0159532	0.0148798	0.0198464											118.6	0.00864239	0.0111995	0.0142541	0.0120977	0.0182199	0.023187											118.6	-0.00126028	0.00531099	0.0002109
												118.8	0.00696812	0.0107956	0.00728431	0.0151986	0.0142941	0.0197745											118.8	0.0088546	0.0108232	0.013762	0.0117957	0.0181632	0.0232187											118.8	-0.00096095	0.0050914	0.00063347
												119	0.00794869	0.0109177	0.00801611	0.0146866	0.0140789	0.0197663											119	0.010116	0.00927499	0.0136615	0.0124002	0.0174228	0.0222769											119	-0.00045416	0.00577508	0.00106302
												119.2	0.00751918	0.0118513	0.0095142	0.013737	0.0146453	0.0204241											119.2	0.0113041	0.00960978	0.0129798	0.0127888	0.0177285	0.022323											119.2	0.00044351	0.00569031	-0.00050171
												119.4	0.00770174	0.0123633	0.0109203	0.0131108	0.0142229	0.0205196											119.4	0.0112862	0.00980583	0.0130048	0.0141376	0.0171706	0.0231783											119.4	0.00071014	0.00653336	-0.00043364
												119.6	0.00773107	0.0129006	0.0112901	0.0132422	0.0142867	0.0199236											119.6	0.0117172	0.00904726	0.0124862	0.0135566	0.0171152	0.0222979											119.6	-0.00035841	0.00650214	-8.9e-05
												119.8	0.00808349	0.0137212	0.0108806	0.0139628	0.0144945	0.0197997											119.8	0.0117748	0.00843977	0.0117185	0.0132866	0.0171581	0.0216688											119.8	-0.00028606	0.00641078	0.00036346
												120	0.0074392	0.0140784	0.0115682	0.0131126	0.0139372	0.0199823											120	0.0114665	0.00859586	0.0115211	0.0132019	0.0176814	0.0218458											120	0.00015218	0.00603703	-0.00106924
												120.2	0.00651828	0.012367	0.0121026	0.0125247	0.0141619	0.0193052											120.2	0.0115226	0.00910331	0.0120638	0.0124619	0.0169843	0.0226375											120.2	1.98E-02	0.00600929	-0.00134124
												120.4	0.00688201	0.0128454	0.0114885	0.0121574	0.0143164	0.0204604											120.4	0.0110985	0.00923492	0.0126199	0.0128004	0.017181	0.0226403											120.4	6.97E-02	0.00724568	-0.00219999
												120.6	0.00683276	0.0119898	0.0118463	0.0114339	0.0138254	0.0203613											120.6	0.0103837	0.00931689	0.0122995	0.0124345	0.0177371	0.0223739											120.6	-0.00030664	0.00729387	-0.00227558
												120.8	0.00739302	0.0118452	0.0113599	0.0104567	0.0139136	0.0204398											120.8	0.00951758	0.00953338	0.0129071	0.0125011	0.018479	0.020469											120.8	-0.0013787	0.0067171	-0.00287419
												121	0.00660408	0.0110013	0.0113643	0.00990276	0.0144616	0.0196869											121	0.00862811	0.00994653	0.0131285	0.0121493	0.0189198	0.0203452											121	-0.00183686	0.00597776	-0.00324292
												121.2	0.00621215	0.0107695	0.0103211	0.00976154	0.0141124	0.0202012											121.2	0.00907877	0.0103602	0.013191	0.012433	0.0181767	0.0196197											121.2	-0.00136205	0.00470442	-0.00260559
												121.4	0.00699843	0.0109369	0.00991639	0.00979769	0.0138882	0.0193783											121.4	0.0091561	0.0110545	0.014828	0.012689	0.0181274	0.0191141											121.4	-0.00123882	0.00433791	-0.00233888
												121.6	0.00793888	0.0118449	0.00931062	0.0107181	0.0139511	0.0189618											121.6	0.00859336	0.0117437	0.0156617	0.0129336	0.0177829	0.0196919											121.6	-0.00166377	0.00405037	-0.00230384
												121.8	0.00865732	0.0129348	0.00891718	0.0104234	0.014386	0.0190387											121.8	0.00817565	0.012272	0.0146126	0.0136202	0.0181376	0.0198648											121.8	-0.00195685	0.00296627	-0.00266908
												122	0.00882247	0.013026	0.00881679	0.0110199	0.01333	0.0185083											122	0.00880876	0.011959	0.0142378	0.0130665	0.0182337	0.0190843											122	-0.00263034	0.00333986	-0.00228091
												122.2	0.00925909	0.0124812	0.0082925	0.0117909	0.0132043	0.0191016											122.2	0.00931357	0.012856	0.0135819	0.0131581	0.0175622	0.0201199											122.2	-0.00095891	0.00267027	-0.00197376
												122.4	0.00993154	0.0126918	0.00825115	0.0116284	0.0138748	0.0189077											122.4	0.00974105	0.0131285	0.0138173	0.0133743	0.0175459	0.0203345											122.4	-7.73E-02	0.0025036	-0.00172749
												122.6	0.0101226	0.0139872	0.00868251	0.0119426	0.01448	0.0190626											122.6	0.010286	0.0134675	0.0147299	0.0129964	0.0175364	0.0204478											122.6	0.00018912	0.00321626	-0.00196318
												122.8	0.010792	0.013812	0.00874579	0.0130756	0.0137353	0.0185333											122.8	0.0101815	0.0123956	0.0151535	0.0129876	0.016843	0.0198787											122.8	-0.00031648	0.00271524	-0.00192013
												123	0.0107014	0.0142051	0.00993585	0.0135206	0.0135516	0.0185281											123	0.0109051	0.0113046	0.0150534	0.0136953	0.0168806	0.0194755											123	-0.00054723	0.00339324	-0.00239399
												123.2	0.0112571	0.0146443	0.0111747	0.0136825	0.013002	0.01906											123.2	0.0111698	0.0125779	0.0146944	0.0138635	0.0174443	0.0207246											123.2	-0.0002295	0.00336025	-0.00301298
												123.4	0.011257	0.0150648	0.0107884	0.0138	0.0127586	0.0189936											123.4	0.0109403	0.0116647	0.0152608	0.0125782	0.0169485	0.0211103											123.4	0.00054444	0.00400668	-0.00273811
												123.6	0.0109407	0.0149511	0.0104708	0.0136763	0.0124466	0.0189859											123.6	0.0110279	0.0109154	0.0148781	0.0119084	0.0173698	0.0211206											123.6	2.57e-06	0.00456239	-0.00298939
												123.8	0.0107727	0.0151542	0.0101317	0.0131842	0.0129739	0.0197341											123.8	0.0101991	0.0100836	0.0147379	0.0110696	0.0166458	0.0211975											123.8	0.00017782	0.00555261	-0.00363895
												124	0.010282	0.0147905	0.0107551	0.013121	0.0134411	0.0192657											124	0.00954645	0.00942842	0.014424	0.0113568	0.0159894	0.0227822											124	0.00038802	0.00593493	-0.00372388
												124.2	0.00908226	0.0135845	0.0102094	0.0129891	0.0139551	0.0197353											124.2	0.00939105	0.00950934	0.0134291	0.0106511	0.0151452	0.0234971											124.2	-0.00030414	0.00712049	-0.00267938
												124.4	0.00910278	0.0145375	0.00955262	0.0134186	0.0130264	0.0197832											124.4	0.00867912	0.00824562	0.0129209	0.0109676	0.0150233	0.0232119											124.4	-0.00085602	0.00767017	-0.00175949
												124.6	0.00829872	0.01323	0.0100546	0.0127841	0.0123829	0.0195385											124.6	0.00878305	0.0076766	0.0122573	0.0099949	0.0155186	0.0222945											124.6	-0.00157613	0.00766473	-0.00116968
												124.8	0.00880547	0.0128971	0.00989898	0.0126825	0.0133812	0.0193806											124.8	0.00844747	0.00690641	0.0115482	0.0102461	0.0147253	0.0213424											124.8	-0.00103894	0.00720146	-0.00074485
												125	0.00786077	0.0116493	0.00926407	0.0125223	0.0134455	0.0207104											125	0.00838176	0.00711325	0.0104878	0.0110505	0.015107	0.0207643											125	-0.00040002	0.00722548	-0.00021612
												125.2	0.00823213	0.0113235	0.00910682	0.0133047	0.0133856	0.0216309											125.2	0.00921287	0.00778896	0.0108686	0.0121231	0.0142737	0.0206083											125.2	-0.0015404	0.00626591	0.00098964
												125.4	0.00905109	0.0104526	0.00953323	0.0137905	0.0140224	0.0205524											125.4	0.0102064	0.0082741	0.0112287	0.0126793	0.0140864	0.0202216											125.4	-0.00120605	0.00707509	-0.00019594
												125.6	0.00874002	0.0111038	0.00874834	0.0138269	0.0135292	0.020286											125.6	0.0108197	0.0086766	0.00998438	0.0130943	0.0137901	0.0198899											125.6	-0.0006921	0.00727371	-0.00056494
												125.8	0.00824138	0.0117698	0.00818516	0.013397	0.0134653	0.0205289											125.8	0.0114189	0.00967425	0.00980535	0.0131783	0.0134669	0.0196497											125.8	0.0001577	0.00690325	-0.00025541
												126	0.00857529	0.0111631	0.0078884	0.013555	0.0134832	0.0200072											126	0.0126099	0.0111331	0.00980356	0.0125067	0.0128437	0.0189377											126	0.0006334	0.00694719	0.00010034
												126.2	0.00881267	0.0101297	0.00791773	0.0138326	0.0136964	0.0203809											126.2	0.0126331	0.011543	0.0100595	0.0117734	0.012636	0.0196406											126.2	0.00192756	0.00562524	0.00120574
												126.4	0.00854682	0.0102274	0.00792925	0.0137478	0.0144125	0.0202647											126.4	0.0128212	0.0125662	0.0102495	0.0122413	0.0121098	0.0189183											126.4	0.00219661	0.00481881	0.00095835
												126.6	0.00863467	0.0107402	0.00850233	0.0144382	0.0140276	0.0201211											126.6	0.0127818	0.0117538	0.0111924	0.0120711	0.0118607	0.0185069											126.6	0.00277359	0.00528397	0.00131212
												126.8	0.00815734	0.0106204	0.00977914	0.0137696	0.0145728	0.0203989											126.8	0.0124601	0.0118106	0.0110751	0.0124401	0.0118423	0.0182002											126.8	0.00232937	0.00567271	0.00139591
												127	0.00776404	0.0107282	0.0108675	0.0131607	0.0134475	0.0202685											127	0.0120276	0.0114624	0.011682	0.0127313	0.0116713	0.0176698											127	0.00272703	0.00542402	0.00167326
												127.2	0.00769535	0.0105658	0.0109589	0.0128322	0.0134278	0.0210973											127.2	0.0112512	0.0115279	0.0114315	0.0127177	0.0119087	0.017949											127.2	0.00339822	0.00589445	0.00144916
												127.4	0.0064486	0.0113292	0.0110922	0.0120434	0.0133374	0.0209965											127.4	0.0109795	0.0102688	0.0120878	0.011526	0.0121701	0.0183635											127.4	0.00328035	0.0059817	0.00193511
												127.6	0.00688404	0.0116405	0.010387	0.0118061	0.0132411	0.0211804											127.6	0.0110138	0.00985667	0.0122972	0.0119374	0.0126855	0.0190153											127.6	0.00103731	0.00651926	0.00195074
												127.8	0.00735511	0.0125048	0.0102435	0.0121595	0.0132229	0.0204848											127.8	0.00997219	0.00889231	0.0125673	0.011924	0.0125744	0.0192379											127.8	-7.17E-02	0.00592331	0.00170572
												128	0.00772887	0.0128339	0.0106468	0.0128369	0.0131824	0.019723											128	0.00949456	0.00850527	0.0130926	0.0120485	0.0128847	0.0200667											128	-0.00117176	0.00613467	0.00245126
												128.2	0.00737229	0.0124996	0.0103522	0.0127857	0.0132565	0.0203441											128.2	0.010891	0.00840045	0.0136435	0.0119846	0.0132113	0.0207756											128.2	-0.00077611	0.00672911	0.00236987
												128.4	0.00769492	0.0129275	0.0117579	0.0140316	0.0129643	0.0196347											128.4	0.0109451	0.0075529	0.014019	0.011847	0.0143506	0.021886											128.4	-0.00231414	0.00639246	0.00214692
												128.6	0.00757982	0.0118646	0.011875	0.0143765	0.0137176	0.020214											128.6	0.0108868	0.00751828	0.0139117	0.0115812	0.0155076	0.0218717											128.6	-0.00360602	0.00600006	0.00187051
												128.8	0.00788921	0.0119103	0.0113157	0.0148615	0.0140841	0.0203194											128.8	0.0101724	0.00728283	0.0139248	0.0119739	0.0154155	0.0218716											128.8	-0.00376832	0.00576745	0.00132425
												129	0.00871442	0.010837	0.0108894	0.015227	0.0147136	0.0206364											129	0.0100718	0.00839826	0.0143999	0.0126699	0.0163977	0.022155											129	-0.00404805	0.00711448	0.00165939
												129.2	0.00958442	0.0103605	0.010701	0.0161411	0.0153118	0.0203804											129.2	0.0107596	0.00960245	0.0145056	0.0124676	0.0160229	0.0229094											129.2	-0.00442284	0.00647113	0.00052657
												129.4	0.010648	0.01039	0.00936711	0.0160603	0.0152779	0.0196084											129.4	0.0106749	0.00925904	0.013944	0.0111376	0.0159063	0.0225922											129.4	-0.00325375	0.00769026	-0.0005536
												129.6	0.0108883	0.0113124	0.00806021	0.0163401	0.0151723	0.0192559											129.6	0.00998615	0.0106742	0.0140158	0.0101965	0.0159542	0.0231292											129.6	-0.00313345	0.00780598	3.92E-02
												129.8	0.0103277	0.0121442	0.0081413	0.0167385	0.0156161	0.0197348											129.8	0.0101652	0.0118683	0.0141696	0.00949533	0.0151623	0.0229879											129.8	-0.00246505	0.00766698	0.00039896
												130	0.0110916	0.012018	0.00902281	0.0177555	0.0153671	0.0185445											130	0.00975326	0.0126105	0.013537	0.00859801	0.0159503	0.0226064											130	-0.00294348	0.00801223	0.00018292
												130.2	0.0116413	0.0116998	0.00922628	0.0174339	0.0152544	0.0184439											130.2	0.0095438	0.0125837	0.0131493	0.00861135	0.0164074	0.0222818											130.2	-0.00237832	0.00795982	0.00049433
												130.4	0.0110724	0.0129014	0.00957401	0.0168732	0.0152437	0.0184378											130.4	0.00910581	0.0131904	0.0125416	0.0100421	0.0170073	0.0218247											130.4	-0.00103731	0.00813615	0.00077229
												130.6	0.0109143	0.0132737	0.00989509	0.0162452	0.0139881	0.0186222											130.6	0.00821054	0.0129442	0.0127837	0.00948865	0.0175363	0.0218038											130.6	-0.00070661	0.00896812	0.00057659
												130.8	0.0102953	0.0132011	0.0109019	0.0152406	0.0136688	0.0182906											130.8	0.00806764	0.0136226	0.0123832	0.00963627	0.0173206	0.0204973											130.8	3.46E-02	0.00899065	0.0005993
												131	0.00981791	0.0128047	0.0108064	0.0147872	0.0125964	0.0182181											131	0.0079685	0.0120164	0.0115064	0.00981406	0.0174946	0.0201262											131	0.00149953	0.00890248	0.00041576
												131.2	0.0095024	0.0122729	0.0106122	0.0131569	0.0127709	0.0187273											131.2	0.00790646	0.0113123	0.0111042	0.00989363	0.0180754	0.0203694											131.2	0.00204027	0.00931887	0.0006765
												131.4	0.00927506	0.012141	0.0106634	0.012997	0.0122332	0.0179626											131.4	0.00868516	0.0100591	0.0124607	0.0097695	0.0176013	0.0206242											131.4	0.00222878	0.00849572	0.00125794
												131.6	0.00962067	0.0117643	0.00961387	0.0126308	0.0115581	0.0184993											131.6	0.00878626	0.0100211	0.013308	0.0107475	0.0172761	0.0197355											131.6	0.00235363	0.00834438	0.00130412
												131.8	0.00991277	0.0106865	0.0103726	0.0118586	0.0111716	0.018108											131.8	0.00863539	0.00933649	0.0132958	0.0103558	0.0172201	0.0191119											131.8	0.00360128	0.00718933	0.00083561
												132	0.00987705	0.00941594	0.010514	0.0106473	0.0116017	0.0193665											132	0.00920904	0.00783012	0.0139999	0.00974104	0.0162588	0.0184155											132	0.00423735	0.00804306	0.00027249
												132.2	0.00966261	0.00860669	0.0108202	0.009966	0.011576	0.0199439											132.2	0.0107602	0.00680228	0.013771	0.0104155	0.0169818	0.0185694											132.2	0.00496451	0.00717262	0.00013286
												132.4	0.00883201	0.00808564	0.0110097	0.00977056	0.0125852	0.0202375											132.4	0.0101742	0.00615324	0.0130983	0.0110694	0.0170009	0.018588											132.4	0.00341808	0.00766894	-0.00103761
												132.6	0.008281	0.00665803	0.00987332	0.00943814	0.0131571	0.0208707											132.6	0.00988305	0.00590666	0.0130913	0.0107596	0.0163617	0.0171513											132.6	0.00274769	0.00765051	-0.00102325
												132.8	0.00843736	0.00715424	0.00972572	0.00881378	0.0136893	0.0217548											132.8	0.00958766	0.00575061	0.0134873	0.0112397	0.0157207	0.0167551											132.8	0.00190796	0.00754728	-0.00139477
												133	0.00838157	0.00735155	0.00896085	0.00917305	0.014725	0.0223956											133	0.00945708	0.00638845	0.01317	0.0120278	0.0154902	0.0161655											133	0.00193727	0.00772408	-0.0022473
												133.2	0.00821199	0.00750875	0.00745089	0.0100488	0.0143794	0.0223709											133.2	0.00926055	0.00626426	0.0123469	0.0115963	0.0149625	0.0164437											133.2	0.00178795	0.00697114	-0.00373769
												133.4	0.00791167	0.0077162	0.00667084	0.00993739	0.0144212	0.0218416											133.4	0.00828871	0.00606785	0.0124552	0.011091	0.0143793	0.0165079											133.4	0.00050423	0.00771417	-0.0037761
												133.6	0.0076693	0.00824062	0.00674615	0.0104477	0.0145926	0.020676											133.6	0.00846503	0.00654812	0.0117967	0.011019	0.0137437	0.0173538											133.6	-0.00048458	0.00768218	-0.00376613
												133.8	0.00663073	0.00942245	0.00741589	0.0116098	0.0147497	0.0205081											133.8	0.00918682	0.00611449	0.0119743	0.0113519	0.0134451	0.0164303											133.8	-0.00269814	0.00889276	-0.00396792
												134	0.00774194	0.00912586	0.00823909	0.0119217	0.013383	0.0197779											134	0.00916667	0.0063523	0.0115984	0.0116707	0.0149985	0.0167623											134	-0.0054712	0.008684	-0.0037826
												134.2	0.00782605	0.0102974	0.00750401	0.0117031	0.0130449	0.0195583											134.2	0.00852954	0.00611978	0.0110772	0.0124794	0.0155123	0.0168522											134.2	-0.00559807	0.00937041	-0.00347008
												134.4	0.00755007	0.0107785	0.00796043	0.0121734	0.0122714	0.0193548											134.4	0.00797019	0.00646302	0.0110566	0.0138592	0.0154808	0.0181781											134.4	-0.00507699	0.00785343	-0.00311388
												134.6	0.00801233	0.0106208	0.00754506	0.0129354	0.0116112	0.0196645											134.6	0.00822879	0.00755184	0.0107721	0.0133653	0.015173	0.019018											134.6	-0.00491916	0.00672563	-0.00319393
												134.8	0.0084814	0.0105494	0.00785598	0.0141153	0.0114105	0.0191804											134.8	0.00923234	0.00762492	0.00968694	0.0145348	0.0152584	0.0196329											134.8	-0.00428236	0.00673154	-0.0019493
												135	0.00888374	0.0101928	0.00757803	0.0150478	0.0112627	0.0184382											135	0.00868781	0.00666793	0.00925692	0.0147327	0.0156011	0.0203507											135	-0.00449547	0.00656797	-0.002439
												135.2	0.00907693	0.0112424	0.00717386	0.0149817	0.0109277	0.0178257											135.2	0.0084266	0.00703885	0.0100738	0.0148228	0.0150251	0.0204141											135.2	-0.00394886	0.00598786	-0.00051755
												135.4	0.00928614	0.0110822	0.00731566	0.0162613	0.0116052	0.0174091											135.4	0.00849606	0.0077152	0.0101218	0.0152171	0.0139508	0.0208336											135.4	-0.00261636	0.00523624	0.00072049
												135.6	0.00999512	0.0114064	0.00706142	0.0156479	0.0108324	0.0182385											135.6	0.00858831	0.00905301	0.00952818	0.0148602	0.0134158	0.0201765											135.6	-0.00213336	0.00457943	0.00205613
												135.8	0.010492	0.0108438	0.00780453	0.0158542	0.0109482	0.0188993											135.8	0.00879939	0.00954234	0.00994624	0.0137472	0.0137891	0.020096											135.8	-0.00258082	0.00296139	0.00290064
												136	0.0104995	0.0108028	0.00753471	0.0153834	0.0117414	0.019334											136	0.00957498	0.010071	0.0100338	0.013779	0.0131117	0.0199145											136	-0.00289139	0.00225507	0.00275852
												136.2	0.0103825	0.010857	0.00730863	0.0151167	0.0119737	0.0182165											136.2	0.00963914	0.0103692	0.0099792	0.0144948	0.0144564	0.0198554											136.2	-0.00161174	0.00127302	0.00266753
												136.4	0.0101479	0.0115091	0.00740364	0.0154809	0.0127393	0.0186046											136.4	0.0092714	0.0102893	0.0108812	0.0154621	0.0141356	0.0190372											136.4	-0.00197971	0.0017642	0.002169
												136.6	0.0102176	0.0119863	0.00721105	0.0160354	0.0128322	0.0191036											136.6	0.00888801	0.0107713	0.0124172	0.0144487	0.0144548	0.018536											136.6	-0.00252665	0.00107724	0.00318277
												136.8	0.0103596	0.0127612	0.00758317	0.015505	0.0133757	0.0193621											136.8	0.00926582	0.0107085	0.0132809	0.0145648	0.0150645	0.0188043											136.8	-0.00319242	0.00085478	0.00400175
												137	0.00940043	0.0126119	0.00651134	0.0153709	0.0133654	0.0187945											137	0.00900751	0.01074	0.0133771	0.0143314	0.0151783	0.0184957											137	-0.00313774	0.00084586	0.0044072
												137.2	0.00865193	0.0119589	0.00669429	0.0154333	0.0131274	0.0177096											137.2	0.0095193	0.0110199	0.0134878	0.0130106	0.0146273	0.0184103											137.2	-0.00324496	0.00137849	0.00514325
												137.4	0.00865785	0.0112389	0.00737844	0.0148697	0.0131018	0.0166405											137.4	0.00850064	0.0108795	0.0137411	0.0120354	0.0143673	0.0180797											137.4	-0.00375391	0.00211933	0.00548047
												137.6	0.00860273	0.0103781	0.00806862	0.0148651	0.0131419	0.0164403											137.6	0.00901104	0.00986904	0.0147861	0.0115848	0.0141184	0.0185028											137.6	-0.00475752	0.00244442	0.00552917
												137.8	0.0093095	0.00989654	0.00962784	0.0146211	0.0126166	0.0174913											137.8	0.00805836	0.00942283	0.015585	0.0112131	0.0142245	0.0178921											137.8	-0.00454403	0.00388052	0.00638518
												138	0.0101413	0.00912634	0.00978738	0.0144187	0.0124441	0.0186276											138	0.00709012	0.00938965	0.0150836	0.0110299	0.0144218	0.0185319											138	-0.00443869	0.00344567	0.00639605
												138.2	0.00999268	0.00876727	0.00893627	0.0145249	0.0128326	0.018711											138.2	0.00522454	0.00916919	0.0158513	0.0109757	0.0139951	0.0185849											138.2	-0.00386685	0.00374294	0.00624646
												138.4	0.00964017	0.00740287	0.0107333	0.0143974	0.012115	0.0185609											138.4	0.00541205	0.00903388	0.0164972	0.0114627	0.0141814	0.0193414											138.4	-0.00251823	0.00373454	0.0059503
												138.6	0.0091353	0.00645168	0.0106173	0.0144487	0.0128504	0.0188668											138.6	0.00564176	0.00920292	0.0166919	0.0114183	0.014164	0.0192832											138.6	-0.00193255	0.00518922	0.00550419
												138.8	0.00918156	0.00642483	0.0108712	0.0149833	0.0130736	0.0186509											138.8	0.00551943	0.00916217	0.0163715	0.011797	0.014824	0.0192369											138.8	-0.00191862	0.00685657	0.00485478
												139	0.00858675	0.00659221	0.0106526	0.0144427	0.0131424	0.0183644											139	0.00534216	0.00892617	0.0163531	0.0115207	0.015676	0.0189771											139	-0.00153217	0.0074823	0.00362171
												139.2	0.00787964	0.00776665	0.0100632	0.0135682	0.0142751	0.0180052											139.2	0.00657334	0.0094532	0.0162831	0.0113513	0.0165384	0.0194487											139.2	-0.00185056	0.00751274	0.00422781
												139.4	0.0076396	0.00663555	0.0100206	0.0133755	0.0137958	0.0184873											139.4	0.00730465	0.010832	0.0160458	0.0107353	0.0168703	0.0200711											139.4	-0.00123588	0.00841756	0.00307436
												139.6	0.0077516	0.0069067	0.0103579	0.0128505	0.0129395	0.0191679											139.6	0.00745169	0.0115681	0.0157677	0.0101027	0.0168197	0.0194638											139.6	-0.00260608	0.00937973	0.00212446
												139.8	0.00690367	0.00723145	0.0101496	0.0130539	0.0128395	0.0195387											139.8	0.00784147	0.0118049	0.0156878	0.0108629	0.0175813	0.018275											139.8	-0.00297675	0.00865903	0.00081722
												140	0.006589	0.00845098	0.00970245	0.0125544	0.0129357	0.0187232											140	0.00784808	0.011928	0.0142305	0.0116549	0.018499	0.0189129											140	-0.00229216	0.00835379	-0.0005381
												140.2	0.00624324	0.00871757	0.00932305	0.0124426	0.0126787	0.018164											140.2	0.00761785	0.0111674	0.013257	0.0126508	0.0191771	0.0187385											140.2	-0.00185546	0.00733208	-0.00124105
												140.4	0.00648371	0.00959203	0.00937388	0.012866	0.0121361	0.0185811											140.4	0.00855553	0.0102493	0.0124349	0.0132091	0.018027	0.019222											140.4	-0.00218631	0.00740512	-0.00130558
												140.6	0.00679203	0.00990973	0.00899792	0.0126617	0.0117366	0.0186964											140.6	0.00874929	0.0106146	0.0113383	0.0125852	0.0175386	0.0198205											140.6	-0.00296239	0.00741792	-0.00019503
												140.8	0.0071486	0.00999839	0.00943589	0.012291	0.0109755	0.0180489											140.8	0.00979014	0.0095071	0.0101195	0.0118513	0.0160856	0.0194146											140.8	-0.00421412	0.00636881	1.96E-02
												141	0.00669985	0.0100482	0.00826503	0.0127572	0.0100717	0.0182705											141	0.00963664	0.0090936	0.00885821	0.0112543	0.0150983	0.0184548											141	-0.00397205	0.00518895	-0.0005804
												141.2	0.00670182	0.0103624	0.0091684	0.0131406	0.0096711	0.0175264											141.2	0.0097249	0.00911332	0.00785835	0.00964285	0.0146377	0.0181922											141.2	-0.00433488	0.00502454	-0.0019339
												141.4	0.00709535	0.0103933	0.00937743	0.013588	0.0102541	0.0168929											141.4	0.00959592	0.0080527	0.00758577	0.00864915	0.014424	0.0190895											141.4	-0.00438027	0.00400502	-0.0012751
												141.6	0.00795524	0.0105595	0.00984637	0.0135512	0.0104888	0.0185297											141.6	0.00921003	0.0067965	0.00796189	0.00790052	0.0136026	0.0197402											141.6	-0.00589703	0.00348535	-0.001147
												141.8	0.00872843	0.0110361	0.0100926	0.0130076	0.0103052	0.0181927											141.8	0.00812295	0.00633294	0.00728177	0.00746432	0.0131206	0.0198816											141.8	-0.00524243	0.00373497	-0.00040118
												142	0.0081864	0.011265	0.00925594	0.0134308	0.0115351	0.018142											142	0.00835115	0.00614194	0.00770093	0.00808788	0.0130995	0.0193247											142	-0.00523713	0.00316213	-0.00067541
												142.2	0.00875444	0.0109247	0.00975443	0.0132454	0.0122464	0.0175047											142.2	0.00794311	0.00565064	0.00928536	0.00787001	0.0129276	0.0197795											142.2	-0.00499069	0.00308619	-0.00118653
												142.4	0.00830237	0.0105144	0.0118395	0.0136113	0.0126357	0.0171925											142.4	0.00798756	0.0051611	0.00935844	0.00805828	0.0135671	0.0199915											142.4	-0.00430166	0.00440949	-0.00078693
												142.6	0.00804917	0.0106828	0.0113346	0.0134949	0.0146556	0.0175693											142.6	0.00889997	0.0060772	0.00990454	0.00912123	0.0134202	0.02058											142.6	-0.00361518	0.00494737	-0.00086024
												142.8	0.00832127	0.0109144	0.0112472	0.0136716	0.0152012	0.0173251											142.8	0.00857545	0.0063717	0.00969325	0.00911325	0.0147412	0.0202719											142.8	-0.00354058	0.00433973	-0.00128345
												143	0.00823255	0.0112511	0.0107212	0.0132962	0.0155899	0.0167858											143	0.00889298	0.00679905	0.0103518	0.00928943	0.0153393	0.0199484											143	-0.00332554	0.00412906	-0.00177904
												143.2	0.00906864	0.0108259	0.0110469	0.0131709	0.0163478	0.0168372											143.2	0.00874287	0.00726018	0.0113949	0.00969782	0.0157381	0.0197913											143.2	-0.0029815	0.00475092	-0.00160547
												143.4	0.00953028	0.0109441	0.0112604	0.0123435	0.0160163	0.0181408											143.4	0.00841682	0.00812384	0.0123817	0.00943806	0.0157131	0.0195795											143.4	-0.00206243	0.00630589	-0.00201636
												143.6	0.0104321	0.0115096	0.0119634	0.0120238	0.0157727	0.0190304											143.6	0.00773171	0.00846908	0.0123885	0.0103869	0.0151581	0.0187658											143.6	-0.00216011	0.0069299	-0.00238864
												143.8	0.0109487	0.011913	0.0119619	0.0124105	0.016596	0.0188667											143.8	0.00827857	0.00882049	0.0122491	0.0109995	0.0154784	0.0177864											143.8	-0.00142435	0.00652231	-0.00197791
												144	0.0117576	0.0116497	0.011833	0.0122813	0.0172301	0.0182052											144	0.00746329	0.00968293	0.0112687	0.011837	0.0163689	0.019177											144	-0.00150502	0.00586184	-0.00214724
												144.2	0.0116654	0.0109488	0.0112805	0.0118065	0.0166854	0.0180276											144.2	0.00737849	0.010131	0.0103429	0.0125766	0.0156508	0.0191116											144.2	-0.00240859	0.0049671	-0.00245923
												144.4	0.0119225	0.0114938	0.0108922	0.0113106	0.0162086	0.0186065											144.4	0.00698816	0.0101033	0.0101229	0.0119091	0.0147794	0.0185237											144.4	-0.00193167	0.0058029	-0.00218548
												144.6	0.0123116	0.0117041	0.00990385	0.0109858	0.0160179	0.0182191											144.6	0.00678628	0.0106132	0.0101019	0.0116665	0.0140442	0.0172044											144.6	-0.00260171	0.00618217	-0.00161134
												144.8	0.0120448	0.0110682	0.00958297	0.0111269	0.0155542	0.0180319											144.8	0.0072038	0.00912728	0.00976604	0.0115713	0.0136387	0.0157578											144.8	-0.00363003	0.00549307	-0.00192303
												145	0.0115188	0.0108475	0.00867115	0.0115888	0.0149459	0.0183756											145	0.00660293	0.00920552	0.00968406	0.011182	0.0140726	0.0156767											145	-0.00331208	0.00615308	-0.0011107
												145.2	0.0106478	0.0107837	0.00848123	0.0116048	0.0146707	0.0174944											145.2	0.00709231	0.00905251	0.00969815	0.0105874	0.0137887	0.0154672											145.2	-0.00453812	0.00698754	-0.00015256
												145.4	0.0103543	0.0109139	0.00793794	0.0109764	0.0144521	0.0173691											145.4	0.00728433	0.00832933	0.00940168	0.0100587	0.0131407	0.0149719											145.4	-0.00477727	0.00635463	0.00153541
												145.6	0.0107067	0.0111284	0.00687795	0.0113627	0.0129111	0.017455											145.6	0.00805863	0.00868589	0.00930835	0.00877	0.0129576	0.0143076											145.6	-0.00507279	0.00707712	0.00210907
												145.8	0.010965	0.010813	0.00690417	0.0115464	0.0127551	0.0156932											145.8	0.0090217	0.00944327	0.00960654	0.00922134	0.01276	0.0139308											145.8	-0.00498495	0.00747766	0.00369446
												146	0.010264	0.0110156	0.00703956	0.0118484	0.0130094	0.0148861											146	0.0096963	0.00907923	0.0101446	0.00942149	0.0135594	0.0131994											146	-0.00466404	0.00767731	0.00505153
												146.2	0.0104237	0.0105403	0.00717342	0.0126138	0.0131933	0.0144206											146.2	0.00953701	0.00882638	0.0100263	0.00958917	0.0143076	0.0144615											146.2	-0.00501706	0.0081362	0.00506842
												146.4	0.00932712	0.00987697	0.0070622	0.0132473	0.0117629	0.0139569											146.4	0.0104651	0.00883817	0.00896144	0.00966061	0.0144783	0.0148055											146.4	-0.00469757	0.00768657	0.00587236
												146.6	0.00852361	0.0104807	0.00638429	0.0133061	0.0113411	0.0141001											146.6	0.0108925	0.00930467	0.00919724	0.0101269	0.014246	0.0150533											146.6	-0.00283248	0.00746825	0.0050885
												146.8	0.00849365	0.0105585	0.0068024	0.0128453	0.0102684	0.0137706											146.8	0.0109981	0.00859713	0.00953075	0.00975361	0.0151114	0.0146917											146.8	-0.00252838	0.00775384	0.00505077
												147	0.00899536	0.0106862	0.00683651	0.0132436	0.00960793	0.0145619											147	0.0115111	0.0086523	0.0103222	0.0103988	0.0149026	0.0155302											147	-0.0015014	0.00713742	0.00374026
												147.2	0.00881658	0.010481	0.00691608	0.0131258	0.00959604	0.0156556											147.2	0.0119933	0.00856087	0.0108137	0.0107308	0.0152412	0.0164595											147.2	-0.00041682	0.00790816	0.00345494
												147.4	0.00869325	0.0116877	0.00721652	0.0129472	0.00983039	0.0160749											147.4	0.0117569	0.00809625	0.0108534	0.00951327	0.0150285	0.0174825											147.4	0.00012485	0.00749503	0.00334129
												147.6	0.00924658	0.011509	0.00793512	0.0125239	0.00879888	0.015427											147.6	0.011864	0.00838368	0.0105477	0.00996744	0.0141221	0.018009											147.6	0.00048248	0.0070996	0.00226251
												147.8	0.00951827	0.0114146	0.00865762	0.0119647	0.00984397	0.0151939											147.8	0.0119661	0.00764484	0.0104281	0.0102677	0.014423	0.0185056											147.8	-6.12E-02	0.00600662	0.0009588
												148	0.00896265	0.0120554	0.00809144	0.0116051	0.00971576	0.0153026											148	0.0106615	0.00818372	0.00991821	0.00980392	0.0141044	0.0190443											148	-0.00065043	0.00512861	-0.00036837
												148.2	0.00829371	0.0130523	0.00802386	0.0113101	0.0100712	0.0159621											148.2	0.0103832	0.00848977	0.0103018	0.00942986	0.0139356	0.0189502											148.2	-0.00123455	0.00534679	-0.00101653
												148.4	0.00885179	0.0135274	0.0077688	0.010962	0.0106862	0.0160632											148.4	0.00959946	0.00852171	0.0111672	0.00903919	0.0133987	0.0188748											148.4	-0.00062038	0.00555993	-0.00127024
												148.6	0.00919888	0.0129074	0.00800481	0.0107143	0.0113848	0.015786											148.6	0.00937561	0.00839846	0.0120865	0.00957333	0.0121912	0.0189125											148.6	-0.00103411	0.00591246	-0.00105354
												148.8	0.00876458	0.0123135	0.00827484	0.0112742	0.0113818	0.0161623											148.8	0.00841777	0.00795834	0.0120263	0.00991072	0.0116487	0.0193978											148.8	-0.0017968	0.0055113	-0.00161925
												149	0.00910085	0.0117242	0.00852275	0.011663	0.011089	0.0160842											149	0.007756	0.00885774	0.012557	0.00953606	0.0112766	0.0203768											149	-0.00224568	0.00610886	-0.00062302
												149.2	0.00864789	0.0112056	0.00812546	0.0111693	0.0116837	0.0164483											149.2	0.00834822	0.00950016	0.0122754	0.00975492	0.0106368	0.0199943											149.2	-0.00304178	0.00542356	-0.00177205
												149.4	0.00869353	0.011013	0.00853731	0.0110598	0.011277	0.0161578											149.4	0.00734117	0.0100685	0.0117413	0.00847655	0.0105761	0.0191369											149.4	-0.00302772	0.00490371	-0.00166656
												149.6	0.00905504	0.0104448	0.00855101	0.0125985	0.01069	0.0161575											149.6	0.00832402	0.0104979	0.0116395	0.00825302	0.0099076	0.0192376											149.6	-0.00381268	0.00516641	-0.00088007
												149.8	0.00937283	0.00942726	0.00905175	0.0135674	0.0105832	0.0147992											149.8	0.00774282	0.0100765	0.0113114	0.00881966	0.00963102	0.0189495											149.8	-0.00394825	0.00584849	-0.0004367
												150	0.00812208	0.00918171	0.00858601	0.0134476	0.011235	0.0151163											150	0.00775479	0.00977531	0.0106754	0.00948986	0.0100134	0.0195817											150	-0.00321783	0.00622721	-0.00160375
												150.2	0.0086839	0.00826429	0.00807553	0.0134181	0.0109061	0.015601											150.2	0.00822339	0.00954642	0.00968574	0.0102314	0.00959313	0.0204698											150.2	-0.0027951	0.00682186	-0.00182868
												150.4	0.00838731	0.00769396	0.00704695	0.0132589	0.0100924	0.015735											150.4	0.00893813	0.00932766	0.00923842	0.0104385	0.00912706	0.0195306											150.4	-0.00225707	0.00611321	-0.0011293
												150.6	0.00808573	0.00802809	0.00682022	0.0134713	0.00960755	0.0158121											150.6	0.00853286	0.00927135	0.00907537	0.0102828	0.0101148	0.0191643											150.6	-0.00170665	0.00679305	-0.00137222
												150.8	0.00840973	0.00732364	0.00654332	0.0140771	0.00897991	0.0156478											150.8	0.00903898	0.00901096	0.00853032	0.01102	0.0107732	0.0199409											150.8	-0.00120168	0.0062258	-0.00035879
												151	0.00881495	0.00683323	0.00617865	0.0155162	0.00916882	0.0160734											151	0.00882961	0.00886886	0.00849487	0.0112109	0.010938	0.020426											151	-0.0005246	0.00537832	-0.00068653
												151.2	0.00788005	0.00683514	0.00484781	0.0152246	0.0101941	0.0160383											151.2	0.00842296	0.00873412	0.00856733	0.0110777	0.0116948	0.0209016											151.2	-0.00023683	0.00580647	-0.00086211
												151.4	0.00809681	0.00710475	0.0047891	0.014523	0.0105666	0.0157356											151.4	0.00787158	0.00838553	0.00894375	0.0105439	0.0127463	0.0207866											151.4	-7.72E-02	0.00521314	-0.00098194
												151.6	0.00820831	0.00753681	0.00488306	0.0133592	0.0102136	0.0160345											151.6	0.00866997	0.00889151	0.0099472	0.0112203	0.0126165	0.021213											151.6	-0.00153822	0.00507895	-0.0024042
												151.8	0.00822692	0.00778141	0.00485309	0.0132775	0.0112689	0.0169526											151.8	0.00922862	0.00842132	0.010928	0.0108317	0.0136904	0.0218227											151.8	-0.00227785	0.00424718	-0.0020322
												152	0.00886528	0.00929004	0.00441132	0.0138777	0.0115308	0.0177997											152	0.0089193	0.00842494	0.0105206	0.00909142	0.0138819	0.021055											152	-0.00215507	0.00463407	-0.00176924
												152.2	0.0092524	0.00954221	0.00470923	0.0135662	0.0120181	0.0173066											152.2	0.00994609	0.00877731	0.0112544	0.00925074	0.0140535	0.0209115											152.2	-0.00127024	0.00557645	-0.00233989
												152.4	0.0102024	0.0099003	0.00576794	0.0139662	0.0118149	0.0175333											152.4	0.0102823	0.00918888	0.0121423	0.0096834	0.0141786	0.0198987											152.4	-0.00060511	0.00528547	-0.0019876
												152.6	0.00929518	0.00985964	0.00605037	0.0145713	0.0121855	0.0176285											152.6	0.00962849	0.00889743	0.0137294	0.00973702	0.0141356	0.0189684											152.6	-0.00096406	0.00491972	-0.00166343
												152.8	0.0087618	0.00967943	0.00642153	0.0146611	0.0119912	0.0176512											152.8	0.00988498	0.00900893	0.0134559	0.00966848	0.0146096	0.0187608											152.8	-0.00062116	0.00470185	-0.0024933
												153	0.00850857	0.00997682	0.00731985	0.0148582	0.0124959	0.0173745											153	0.0100751	0.00946007	0.0133028	0.00933131	0.0149233	0.0185675											153	-0.00073105	0.00500108	-0.00218736
												153.2	0.00771165	0.0106596	0.00772454	0.0144254	0.0130921	0.0177671											153.2	0.0100279	0.00954084	0.0127336	0.00931615	0.0150574	0.0183421											153.2	-0.00064005	0.00461962	-0.00453088
												153.4	0.00725463	0.0109357	0.00884251	0.0145073	0.0133949	0.0167455											153.4	0.0097156	0.00918289	0.012763	0.00814133	0.0149548	0.0186638											153.4	-0.00016529	0.00516012	-0.00422968
												153.6	0.00714366	0.0107749	0.00974811	0.0153692	0.0128442	0.0166736											153.6	0.0109221	0.00816423	0.0126121	0.00883431	0.014002	0.0185169											153.6	-0.001136	0.0050889	-0.00475831
												153.8	0.00651927	0.00976075	0.0105294	0.0150374	0.0127219	0.0158998											153.8	0.0105236	0.0079121	0.0124634	0.00884103	0.0131669	0.0183857											153.8	-0.00041165	0.00634896	-0.0054648
												154	0.00663481	0.0098101	0.0115996	0.0135137	0.012523	0.0161428											154	0.0103243	0.00713302	0.0122915	0.00884435	0.012679	0.0185007											154	-0.00070292	0.00568386	-0.00621194
												154.2	0.00746005	0.0100478	0.0123976	0.0128524	0.0116817	0.0156861											154.2	0.0104442	0.00676594	0.0118872	0.00881952	0.0119175	0.0178823											154.2	-0.00092306	0.00567866	-0.00508149
												154.4	0.00782116	0.00877171	0.0121964	0.0132635	0.0109778	0.0147743											154.4	0.0101372	0.00673959	0.0121596	0.00807156	0.0119413	0.01733											154.4	-0.00075143	0.00499663	-0.00515308
												154.6	0.00890942	0.00864201	0.011853	0.0138457	0.0102137	0.0144461											154.6	0.00972435	0.00646406	0.0123556	0.00786098	0.0121345	0.0176328											154.6	-0.00031838	0.00464182	-0.00523216
												154.8	0.00958967	0.00852773	0.0119183	0.0133435	0.0107426	0.0141723											154.8	0.00931207	0.00566589	0.0123907	0.00850943	0.0114208	0.0178321											154.8	0.00096222	0.00456903	-0.00408231
												155	0.00992666	0.0086776	0.0114269	0.0126197	0.0112825	0.0134309											155	0.00899036	0.00561272	0.0128603	0.00872542	0.0112702	0.0175232											155	0.00064228	0.00484162	-0.00417034
												155.2	0.00966847	0.00878405	0.0107981	0.011678	0.011634	0.0132754											155.2	0.00815553	0.00565082	0.0129962	0.00860272	0.0114209	0.0178842											155.2	0.00045789	0.00476874	-0.0037802
												155.4	0.0096703	0.00927259	0.0119475	0.0110582	0.0110432	0.0135766											155.4	0.00866124	0.00596017	0.0137272	0.00902723	0.0112843	0.0174804											155.4	0.00026527	0.00487154	-0.00262766
												155.6	0.00984903	0.00959733	0.0120212	0.010842	0.0115157	0.0136536											155.6	0.00986752	0.00642856	0.0133682	0.0098909	0.0102524	0.019075											155.6	6.1e-06	0.0046875	-0.00122384
												155.8	0.0104805	0.00986133	0.0110431	0.0108561	0.0115911	0.0145235											155.8	0.00982196	0.00632096	0.013015	0.00984968	0.0101676	0.0192997											155.8	-9.15e-05	0.00484279	0.00013783
												156	0.0113615	0.0108394	0.0105052	0.0111517	0.0120885	0.0148664											156	0.00946573	0.00629458	0.0127945	0.0102571	0.0089992	0.0185865											156	0.00228989	0.00522997	0.00102221
												156.2	0.0114149	0.0102087	0.00980676	0.0116911	0.0124889	0.0146534											156.2	0.00963555	0.00753943	0.0131912	0.0114922	0.00928751	0.0183437											156.2	0.003535	0.00562614	0.00138396
												156.4	0.0108484	0.0111795	0.00923877	0.0130924	0.0120062	0.0155476											156.4	0.00878161	0.00771634	0.0137412	0.0128176	0.00945738	0.0168805											156.4	0.0033007	0.0051569	0.0029281
												156.6	0.0100637	0.0112641	0.00802259	0.0135798	0.0122997	0.0159228											156.6	0.00781102	0.00810198	0.0145909	0.0129419	0.00998132	0.0174753											156.6	0.00324477	0.00507745	0.00364448
												156.8	0.0100057	0.0109734	0.00782228	0.0133201	0.0132435	0.0162595											156.8	0.00845566	0.00917002	0.0140322	0.0131623	0.0100667	0.0179753											156.8	0.00342249	0.00560987	0.00390475
												157	0.0108549	0.0118379	0.00759776	0.0140612	0.0133428	0.0164106											157	0.00853586	0.00965846	0.0142967	0.0134341	0.0104088	0.0190861											157	0.00231685	0.00572275	0.00397847
												157.2	0.0105115	0.011087	0.00708258	0.0132592	0.0131366	0.0170407											157.2	0.008002	0.00963807	0.01493	0.0133087	0.0115525	0.0194813											157.2	0.00210541	0.00464098	0.0033556
												157.4	0.0104345	0.0106211	0.00697274	0.0132099	0.0135358	0.0169998											157.4	0.00798516	0.0100394	0.014564	0.0130262	0.0120486	0.0199234											157.4	0.00209713	0.00401311	0.00415194
												157.6	0.0103852	0.00964788	0.00742231	0.0133632	0.0130039	0.0178098											157.6	0.00773853	0.0101593	0.0145732	0.0124759	0.0122076	0.0193891											157.6	0.00097012	0.00370017	0.00326466
												157.8	0.010222	0.00850752	0.00766318	0.0139576	0.0124744	0.0175141											157.8	0.00711096	0.0101704	0.0145308	0.0120861	0.0114847	0.020469											157.8	0.00094624	0.00284675	0.00203615
												158	0.011007	0.00816492	0.00822858	0.0136138	0.0108576	0.0170106											158	0.00685065	0.00977037	0.0137348	0.0108744	0.012167	0.0203921											158	0.00055488	0.00181428	0.00118089
												158.2	0.0114235	0.00785747	0.00776515	0.0135495	0.0105512	0.0169117											158.2	0.00669133	0.0100624	0.0138414	0.0100156	0.0117112	0.0206458											158.2	0.00034701	0.00207578	0.00020805
												158.4	0.0120103	0.00705702	0.00713253	0.0136772	0.0104479	0.0165595											158.4	0.00633886	0.00955375	0.0135612	0.00890001	0.0118638	0.0216391											158.4	0.000183	0.00245615	-0.000607
												158.6	0.0126591	0.00757006	0.00679603	0.0132227	0.010098	0.0163643											158.6	0.00669095	0.00930886	0.0135299	0.00830762	0.0114986	0.020409											158.6	-0.00035025	0.00214605	-0.00103753
												158.8	0.0123732	0.0083812	0.00740038	0.012273	0.010829	0.01554											158.8	0.00674266	0.00885452	0.0128793	0.00800628	0.0111291	0.0208581											158.8	-0.00054878	0.00341844	0.00040375
												159	0.0121927	0.00881189	0.00713724	0.0119688	0.0101019	0.0153427											159	0.00603995	0.00908772	0.0123517	0.00737232	0.0112488	0.0211868											159	-0.0013128	0.00337107	0.00075671
												159.2	0.0131391	0.00910932	0.00832578	0.0116171	0.00923952	0.0147145											159.2	0.00615287	0.00873466	0.012195	0.00656727	0.0107964	0.0206641											159.2	-0.00060608	0.00395632	0.00077594
												159.4	0.0129427	0.00951097	0.00899994	0.0116554	0.00878715	0.0150544											159.4	0.00715803	0.00897569	0.0123151	0.00692758	0.0103564	0.0201671											159.4	-0.00173323	0.0040619	0.00151746
												159.6	0.0122547	0.0101616	0.00885288	0.0117135	0.0100599	0.0153132											159.6	0.00767125	0.00978001	0.0117665	0.0071342	0.0101196	0.0212255											159.6	-0.00162744	0.00448878	0.00236447
												159.8	0.0128069	0.0102308	0.00930414	0.0117053	0.0107761	0.0162185											159.8	0.00725811	0.00950497	0.0115832	0.00685185	0.0107779	0.0208748											159.8	-0.00179648	0.00451724	0.002048
												160	0.0122865	0.0106984	0.0101502	0.0117968	0.0121237	0.0170129											160	0.00790358	0.00959636	0.0123443	0.00718941	0.0114638	0.0200782											160	-0.00052831	0.00545232	0.00227131
												160.2	0.0114489	0.0109943	0.0102557	0.0117557	0.0128168	0.0168373											160.2	0.00740739	0.010921	0.0120373	0.00746446	0.0119095	0.0187343											160.2	-0.00191773	0.00629462	0.00220681
												160.4	0.0104778	0.0115913	0.00972304	0.0119345	0.0129255	0.0166917											160.4	0.00745651	0.0105743	0.0124591	0.0080581	0.0113236	0.0175852											160.4	-0.00219926	0.00710143	0.00263031
												160.6	0.0109184	0.011233	0.0101332	0.0116294	0.0141176	0.0169439											160.6	0.0084457	0.0105593	0.0129882	0.00839658	0.0124627	0.0179024											160.6	-0.00148141	0.00758694	0.00239642
												160.8	0.0115795	0.0106659	0.0101157	0.0114912	0.0150613	0.0166317											160.8	0.00913768	0.0104096	0.0126708	0.00904407	0.0127969	0.0171924											160.8	-0.00146084	0.00691525	0.00184134
												161	0.0115907	0.01086	0.0110066	0.0118616	0.0151544	0.0166327											161	0.0099749	0.0099264	0.0131959	0.0094667	0.0129804	0.0174704											161	-0.00083043	0.00577345	0.00118724
												161.2	0.0104709	0.0100807	0.0107139	0.0120094	0.0166677	0.016678											161.2	0.00989816	0.00997225	0.0128866	0.00901054	0.0132767	0.0169754											161.2	0.0012388	0.00587647	0.0013982
												161.4	0.00983416	0.00984309	0.010999	0.01233	0.0173423	0.016201											161.4	0.0105168	0.00993563	0.0121691	0.00924213	0.0128575	0.0168397											161.4	0.00113021	0.00571446	0.0009874
												161.6	0.0086479	0.00912431	0.0112756	0.0126696	0.0168922	0.0155348											161.6	0.0105578	0.00941045	0.0124189	0.00940666	0.0122357	0.0161326											161.6	0.00110337	0.00496481	-0.00066045
												161.8	0.00877998	0.00916434	0.0105613	0.0134495	0.0160653	0.0146798											161.8	0.0106638	0.00902242	0.0118269	0.0104581	0.0121692	0.0169208											161.8	0.0014694	0.00443551	-0.00167078
												162	0.00898024	0.00886055	0.0105822	0.0126402	0.0154908	0.0138513											162	0.0104824	0.00793682	0.0109842	0.0103129	0.0124482	0.016197											162	0.00224177	0.00543483	-0.00226508
												162.2	0.00821135	0.00997856	0.0102179	0.0121836	0.0149819	0.0135281											162.2	0.0105484	0.00677029	0.01167	0.0102789	0.0120157	0.016266											162.2	0.00191582	0.00597655	-0.00356055
												162.4	0.00811888	0.0102463	0.00988855	0.0116554	0.0151091	0.0134763											162.4	0.010342	0.0062615	0.0114236	0.010609	0.0118834	0.0165168											162.4	0.00203448	0.00522192	-0.00324024
												162.6	0.00810857	0.0106677	0.0103448	0.0108958	0.0138928	0.0135041											162.6	0.010352	0.0061661	0.0119238	0.010388	0.0119167	0.0159215											162.6	0.00132477	0.0052344	-0.00304665
												162.8	0.00918367	0.0113766	0.00954449	0.0103083	0.0129772	0.0141096											162.8	0.00944481	0.00588609	0.0109403	0.0110615	0.0120378	0.0174686											162.8	0.00106222	0.00572009	-0.00297086
												163	0.0102498	0.0106322	0.0086285	0.00947209	0.0110884	0.0146803											163	0.00851741	0.00692547	0.0101394	0.0110378	0.0120464	0.0164097											163	0.0008792	0.00536984	-0.00395419
												163.2	0.0110505	0.0103278	0.00845851	0.00981197	0.00985809	0.0138201											163.2	0.00832251	0.00744573	0.00996589	0.0117885	0.0111253	0.0157008											163.2	0.00037675	0.00488288	-0.0043405
												163.4	0.0105691	0.0111101	0.00813445	0.00918834	0.00938259	0.0149006											163.4	0.00836058	0.00724538	0.00971285	0.0113104	0.0104885	0.0166804											163.4	-0.00123645	0.00460594	-0.00266772
												163.6	0.0100503	0.0112572	0.00829323	0.00884545	0.0093262	0.0146176											163.6	0.00877403	0.00761358	0.00935403	0.0107891	0.0114195	0.0182344											163.6	-0.00144467	0.00480726	-0.00175527
												163.8	0.0111577	0.0103952	0.00877699	0.00837144	0.00870284	0.0145207											163.8	0.00870131	0.0066851	0.00908829	0.00990697	0.0118333	0.0182785											163.8	-0.00286807	0.00613029	-0.0009146
												164	0.0103686	0.0104196	0.008242	0.00791589	0.00836337	0.0150734											164	0.00952233	0.00765131	0.0107889	0.00937073	0.0117706	0.0176863											164	-0.00364164	0.00704135	-0.00088903
												164.2	0.0105658	0.00936937	0.00754598	0.00862506	0.00860669	0.013753											164.2	0.00930894	0.00832796	0.0107053	0.00881954	0.0116171	0.0173182											164.2	-0.00433559	0.00680933	-0.00090619
												164.4	0.0112766	0.00819029	0.00672698	0.00987985	0.00784953	0.0144329											164.4	0.0104595	0.0077778	0.0106176	0.00788899	0.0118475	0.0179036											164.4	-0.00397079	0.0064087	-0.0002306
												164.6	0.0115985	0.00703508	0.00749127	0.0108344	0.0082514	0.0143891											164.6	0.0109415	0.00762384	0.0108564	0.00774482	0.0116127	0.0183746											164.6	-0.00369198	0.00507866	4.99E-02
												164.8	0.0113015	0.00643567	0.00714832	0.0119983	0.00861877	0.0141606											164.8	0.0105636	0.00840592	0.0113689	0.00649848	0.0107063	0.0182813											164.8	-0.00411477	0.00481117	0.00059751
												165	0.00997729	0.00688243	0.00717573	0.0128272	0.00945997	0.0140988											165	0.010934	0.00868642	0.0117178	0.00643466	0.00926589	0.0188656											165	-0.00461574	0.00477895	0.00100022
												165.2	0.00998574	0.00687847	0.00679321	0.0133704	0.00968494	0.013852											165.2	0.0106134	0.00885506	0.0114305	0.00544598	0.0092687	0.0181845											165.2	-0.00381312	0.00595552	0.00121259
												165.4	0.00936517	0.00732897	0.00731821	0.0135368	0.00961171	0.0143336											165.4	0.0107949	0.00858676	0.0104832	0.00606146	0.00930135	0.0169911											165.4	-0.00462994	0.00571747	0.00072361
												165.6	0.00976254	0.00803611	0.00701378	0.0140271	0.0101847	0.014442											165.6	0.0104541	0.00835662	0.0102305	0.00646053	0.0102861	0.0158438											165.6	-0.00384711	0.00546628	0.00024851
												165.8	0.00953818	0.0089035	0.0070442	0.0146398	0.0117016	0.0151735											165.8	0.0106833	0.00818565	0.00992515	0.00733349	0.010479	0.0162274											165.8	-0.00285531	0.00566602	-0.00039444
												166	0.00827939	0.00915549	0.00777828	0.0148978	0.0125607	0.0151895											166	0.0108003	0.00766609	0.0103159	0.00768155	0.0103684	0.0150083											166	-0.00283562	0.00498911	-0.00059908
												166.2	0.0070207	0.0103387	0.00867148	0.0150127	0.0133029	0.0161113											166.2	0.0109042	0.00712218	0.0110367	0.00720412	0.0114942	0.0139462											166.2	-0.00378405	0.00469439	-0.00087561
												166.4	0.00752986	0.0106052	0.00875909	0.0146598	0.0135123	0.0168895											166.4	0.0102033	0.00760601	0.0100175	0.00724716	0.0120954	0.0133732											166.4	-0.00413143	0.00388659	-1.42E-02
												166.6	0.00692783	0.0108867	0.00954909	0.01457	0.0130382	0.0173803											166.6	0.0103277	0.00781727	0.0086279	0.00740426	0.0130661	0.012802											166.6	-0.00515479	0.00387154	-0.00082805
												166.8	0.00673772	0.0100532	0.0079684	0.0140299	0.0133319	0.0175589											166.8	0.0100151	0.00780554	0.00863098	0.00784828	0.0132375	0.012968											166.8	-0.00473616	0.0039742	-0.00160459
												167	0.00617211	0.00916393	0.00740298	0.0127998	0.0135046	0.0170838											167	0.00982465	0.00870019	0.00898062	0.00788303	0.0133246	0.0125444											167	-0.0037314	0.00359091	-0.0015087
												167.2	0.00524865	0.00931719	0.00749204	0.0115576	0.0139889	0.0159376											167.2	0.0101736	0.00769196	0.00982431	0.00764348	0.0128876	0.0132394											167.2	-0.00371069	0.0031035	-0.0009809
												167.4	0.00526786	0.00902792	0.00729814	0.0104737	0.0140263	0.0149218											167.4	0.0109479	0.00682849	0.00995263	0.00659621	0.0126785	0.0137418											167.4	-0.00344421	0.00415229	0.00019351
												167.6	0.00514086	0.00815122	0.00800702	0.0106485	0.0137146	0.0134757											167.6	0.0122711	0.00684606	0.0096967	0.00683801	0.0136375	0.0142606											167.6	-0.00317072	0.00487644	0.00014657
												167.8	0.00602674	0.00712542	0.00835739	0.0104811	0.0140264	0.0131917											167.8	0.0123535	0.00656125	0.010677	0.00627331	0.0132463	0.0148988											167.8	-0.00228399	0.0054176	1.50E-02
												168	0.00524988	0.00587604	0.0078956	0.0101808	0.0135516	0.012144											168	0.0131185	0.00819365	0.011926	0.00575259	0.0131639	0.0159394											168	-0.00238293	0.00373978	-0.00079408
												168.2	0.00522084	0.00459508	0.00747588	0.0113494	0.0127074	0.0108705											168.2	0.0122148	0.0089204	0.0117064	0.00608752	0.0127505	0.0160889											168.2	-0.00146491	0.00248976	-0.00100443
												168.4	0.00496232	0.00423596	0.0078733	0.0113719	0.0119128	0.0106882											168.4	0.0118938	0.0101592	0.0122963	0.00593545	0.0124595	0.0163961											168.4	-0.0002628	0.00238152	8.06e-06
												168.6	0.00563965	0.00364467	0.00837878	0.010652	0.0116097	0.0101241											168.6	0.0105531	0.00987158	0.0130261	0.00643518	0.0121575	0.0172937											168.6	6.26E-02	0.00185368	-1.75E-02
												168.8	0.00649691	0.00441109	0.00870461	0.0105682	0.0110021	0.010239											168.8	0.0103206	0.0107552	0.0130093	0.00644426	0.0120249	0.0175476											168.8	3.19E-02	0.00275717	-0.00076784
												169	0.0074757	0.00421365	0.00946263	0.0105926	0.0104925	0.011104											169	0.0105583	0.0114607	0.0120055	0.00727669	0.0119059	0.0182387											169	0.00067303	0.0029851	-0.00162658
												169.2	0.00813781	0.00463406	0.00983185	0.0111987	0.00952502	0.0118017											169.2	0.0111912	0.0118784	0.011548	0.00766896	0.0125625	0.0178564											169.2	0.00168758	0.00377563	-0.00166676
												169.4	0.0083019	0.00555549	0.0098334	0.0118235	0.00976591	0.0130076											169.4	0.0112198	0.0123069	0.0115689	0.009116	0.0119342	0.0180575											169.4	0.00216207	0.0034518	-0.00145535
												169.6	0.00871116	0.00599059	0.0106554	0.012081	0.00985629	0.0132602											169.6	0.0110956	0.0125008	0.012219	0.00917828	0.0119268	0.0184086											169.6	0.00231632	0.00299822	-0.00139363
												169.8	0.0082116	0.00693053	0.0110361	0.012213	0.00967931	0.0144122											169.8	0.0107245	0.0123258	0.0129211	0.00974379	0.0111083	0.0188254											169.8	0.00194884	0.00291442	-0.00209809
												170	0.00800437	0.00728968	0.0109386	0.0123059	0.00887325	0.0148419											170	0.00982988	0.0127084	0.0135532	0.00914476	0.0117995	0.0172947											170	0.00108257	0.00363017	-0.00166604
												170.2	0.00820903	0.00858008	0.0107419	0.0129219	0.00892099	0.015825											170.2	0.0093026	0.0123536	0.0126291	0.00880895	0.0120965	0.0171989											170.2	0.0006301	0.00482136	-0.00088644
												170.4	0.0090075	0.00863686	0.00990044	0.0125237	0.00794739	0.0158717											170.4	0.00862317	0.0118312	0.0125069	0.00812385	0.0119272	0.0174311											170.4	-0.00018837	0.00561103	-0.00061379
												170.6	0.00838779	0.00824501	0.00950663	0.0119812	0.00926679	0.0156709											170.6	0.00834717	0.0110576	0.0125428	0.00819268	0.0120064	0.0166822											170.6	-0.00033739	0.0062231	-0.00100194
												170.8	0.00772854	0.00914105	0.00827227	0.0119927	0.00947122	0.0155357											170.8	0.00926322	0.0104081	0.0138903	0.0076235	0.0114023	0.016444											170.8	9.09E-02	0.00763085	-0.00164361
												171	0.00836414	0.00991271	0.00811594	0.0112502	0.0101002	0.016237											171	0.00952904	0.009252	0.0140668	0.00756756	0.0109206	0.0157806											171	-2.52E-02	0.00849485	-0.00204575
												171.2	0.00857697	0.0106656	0.00807223	0.0110853	0.0106276	0.0162454											171.2	0.00962075	0.00842671	0.0142454	0.00767252	0.0112349	0.0156005											171.2	-0.00074521	0.00876591	-0.00242664
												171.4	0.00907805	0.0109521	0.008242	0.0116304	0.0111442	0.0157437											171.4	0.00946291	0.00875932	0.0135973	0.00787907	0.0119466	0.0147172											171.4	-0.00190093	0.00941101	-0.00277521
												171.6	0.00910761	0.0116787	0.00829625	0.0115327	0.0117727	0.0158078											171.6	0.00997561	0.00850618	0.0130997	0.00780683	0.0119284	0.0136367											171.6	-0.00236445	0.00829472	-0.00310703
												171.8	0.00943972	0.011829	0.00760733	0.0114615	0.0127249	0.014461											171.8	0.00894253	0.0085526	0.0134607	0.0077569	0.011663	0.0135107											171.8	-0.00319163	0.00740709	-0.0030673
												172	0.00837061	0.0121565	0.00691988	0.0110426	0.0124801	0.0137067											172	0.0088482	0.00881499	0.0133706	0.00801805	0.0110637	0.013005											172	-0.00403542	0.00617987	-0.00319742
												172.2	0.00848931	0.0115764	0.00711667	0.0112664	0.0124779	0.0131364											172.2	0.00805137	0.00875038	0.0136998	0.00830366	0.0107894	0.011486											172.2	-0.00394249	0.00658055	-0.00291803
												172.4	0.00864482	0.0118822	0.00706299	0.0104364	0.0127035	0.013427											172.4	0.00860282	0.00820895	0.0131379	0.00792602	0.0106418	0.0110543											172.4	-0.00324191	0.00647402	-0.00325974
												172.6	0.00956534	0.0111616	0.0065711	0.0103379	0.0121211	0.0140536											172.6	0.0086315	0.00711106	0.0128886	0.00747952	0.0106343	0.0111539											172.6	-0.00285056	0.00472702	-0.00344391
												172.8	0.00954896	0.0106064	0.00740354	0.0112756	0.0117272	0.0143503											172.8	0.0100822	0.00700606	0.0116064	0.00794434	0.010739	0.0110507											172.8	-0.00298707	0.00452198	-0.00349174
												173	0.00945883	0.00904407	0.00673501	0.0113102	0.0117506	0.0148976											173	0.0106189	0.00760842	0.0110568	0.00833608	0.0102796	0.0121622											173	-0.00324412	0.00414071	-0.00282304
												173.2	0.00965702	0.00970511	0.00693032	0.012569	0.0109002	0.0141519											173.2	0.0110567	0.00812334	0.0109605	0.00931794	0.0101224	0.0127132											173.2	-0.0030758	0.00361022	-0.00170381
												173.4	0.00877322	0.00981432	0.0072012	0.0119597	0.010929	0.0132743											173.4	0.0101229	0.00864093	0.0116461	0.00993329	0.00957035	0.0129538											173.4	-0.00275655	0.0031572	-0.0007934
												173.6	0.00872665	0.00938017	0.00843387	0.0112792	0.00967268	0.0129874											173.6	0.0102039	0.00814502	0.0112752	0.00963511	0.0092799	0.0130188											173.6	-0.00224339	0.00367377	8.7e-07
												173.8	0.00933991	0.00989257	0.00768599	0.0110018	0.00910948	0.0128903											173.8	0.00929117	0.00773014	0.0113354	0.0104371	0.00803448	0.0133137											173.8	-0.00208838	0.00327901	0.00026583
												174	0.00983987	0.0094406	0.0076346	0.0114191	0.00883427	0.0125144											174	0.00825303	0.00757801	0.0108306	0.0103545	0.00761142	0.0128527											174	-0.0019183	0.00374674	0.00066637
												174.2	0.0102421	0.00921459	0.00771143	0.0114142	0.0089382	0.011435											174.2	0.00733742	0.00784973	0.00996154	0.00961096	0.00663094	0.0140452											174.2	-0.00116338	0.00367221	0.00119505
												174.4	0.0104933	0.00869919	0.0077169	0.0105516	0.00920632	0.0109232											174.4	0.00721675	0.00698197	0.0104652	0.00940879	0.0064636	0.0135795											174.4	-0.00154143	0.0030111	0.0016034
												174.6	0.0101161	0.00861235	0.00831349	0.0106511	0.00951573	0.0105864											174.6	0.00775673	0.0073252	0.00997073	0.00988989	0.00598995	0.0136266											174.6	-0.00142287	0.0037003	0.00240187
												174.8	0.00985549	0.00902219	0.00846829	0.0112023	0.00846672	0.0105194											174.8	0.00875324	0.00813522	0.00973118	0.0103568	0.00562942	0.0134742											174.8	-0.00141876	0.00407077	0.00204285
												175	0.0104593	0.00996462	0.00837177	0.0107133	0.0084098	0.0109307											175	0.00837706	0.00753119	0.00959299	0.010393	0.00574221	0.0146903											175	-0.00208978	0.0048102	0.00248795
												175.2	0.0105229	0.0105645	0.00851176	0.0107327	0.00817232	0.0102004											175.2	0.00763787	0.00759803	0.00930418	0.0104522	0.00558507	0.014874											175.2	-0.00172145	0.00461779	0.00223375
												175.4	0.0100111	0.00951699	0.00918159	0.0112305	0.00871459	0.009235											175.4	0.00757866	0.00820291	0.00841948	0.0102092	0.0059267	0.014104											175.4	-0.00259994	0.00424941	0.0029405
												175.6	0.0101318	0.0101711	0.00822368	0.0111006	0.00930015	0.00941832											175.6	0.00816627	0.00817102	0.00750904	0.00941422	0.00566625	0.0141627											175.6	-0.00166684	0.00352596	0.00386127
												175.8	0.00981367	0.0100722	0.00857414	0.0112508	0.00996161	0.0081842											175.8	0.00857478	0.00834059	0.00758375	0.00881225	0.00611547	0.0154046											175.8	-0.00152874	0.00350204	0.00365558
												176	0.00921464	0.00938827	0.00749878	0.0116288	0.0100185	0.00949651											176	0.00903974	0.00804772	0.00771691	0.00831556	0.00650712	0.0150868											176	-0.00095854	0.00386308	0.00308762
												176.2	0.00876787	0.00890579	0.00743916	0.0114244	0.01008	0.00928308											176.2	0.00832563	0.00795955	0.00823864	0.00793771	0.00747603	0.0149518											176.2	-0.00099518	0.00473856	0.00379564
												176.4	0.00849446	0.00968462	0.00684074	0.011221	0.0107041	0.00973909											176.4	0.0088761	0.00764187	0.00818075	0.00697876	0.00804935	0.0156057											176.4	0.00029433	0.0044735	0.00363215
												176.6	0.00950809	0.00967951	0.00757741	0.0120529	0.0110315	0.00962503											176.6	0.0090305	0.0075213	0.00836944	0.0067447	0.00947034	0.0162851											176.6	-0.00020615	0.00401298	0.00443993
												176.8	0.00960893	0.00898911	0.00903655	0.0122051	0.0112241	0.0101899											176.8	0.00906251	0.00722404	0.00852699	0.00678405	0.0110966	0.0170273											176.8	-0.00081743	0.00602945	0.00449507
												177	0.00919181	0.00946028	0.00845402	0.0128069	0.0116809	0.010602											177	0.00881572	0.00819746	0.00933906	0.00707537	0.0115998	0.0181238											177	-0.00132002	0.00691701	0.00472832
												177.2	0.00931057	0.0098393	0.00946488	0.0137936	0.0111773	0.0105357											177.2	0.00881533	0.008167	0.00977974	0.00737627	0.0125023	0.0180157											177.2	-0.00046147	0.00754759	0.00467353
												177.4	0.00859306	0.00960058	0.00911871	0.0130512	0.0108504	0.0107058											177.4	0.00869464	0.00760819	0.00959545	0.00756203	0.0127096	0.016997											177.4	-0.00073464	0.0079739	0.00395863
												177.6	0.0096559	0.00889325	0.00907632	0.0126197	0.00981327	0.0107198											177.6	0.00897858	0.00638599	0.00939217	0.0073785	0.012343	0.017522											177.6	-0.00088141	0.00771922	0.0029583
												177.8	0.0101525	0.00943904	0.00869722	0.0127267	0.0102183	0.0110338											177.8	0.00782609	0.00569204	0.00945026	0.00778368	0.0125931	0.0175623											177.8	-0.00111758	0.00634352	0.00131632
												178	0.0104781	0.00921587	0.00900284	0.0124943	0.00999725	0.0112011											178	0.00688444	0.00542789	0.00966776	0.00760781	0.0130909	0.0168357											178	-0.00085067	0.00582086	-0.0001422
												178.2	0.0104968	0.00889969	0.00893747	0.0117842	0.00958489	0.011097											178.2	0.00631564	0.00595674	0.00998022	0.007833	0.0129872	0.0168469											178.2	-0.00062923	0.0050021	-0.00066344
												178.4	0.0109034	0.00896601	0.00889015	0.0111938	0.00939709	0.0118772											178.4	0.00680651	0.00530963	0.0104299	0.00871498	0.0129635	0.016315											178.4	-0.00129134	0.00414047	-0.00103019
												178.6	0.0113034	0.00870751	0.00896121	0.0109361	0.00838834	0.0118586											178.6	0.00696843	0.0059224	0.0107482	0.00897897	0.0126034	0.0165522											178.6	-0.0014959	0.00445669	-0.00162879
												178.8	0.0117655	0.00877175	0.00848984	0.0103463	0.00743521	0.0118238											178.8	0.00715424	0.00615886	0.0109593	0.0092523	0.0120956	0.0161579											178.8	-0.00178632	0.0038456	-0.00256173
												179	0.0120026	0.00949639	0.00827258	0.00988951	0.00687884	0.0118487											179	0.00737393	0.00541457	0.0114541	0.00911486	0.0115704	0.0166725											179	-0.00227849	0.00387297	-0.00277682
												179.2	0.01252	0.00852381	0.00842612	0.00943528	0.00671663	0.011851											179.2	0.00741112	0.00547028	0.0117984	0.00939865	0.0108676	0.0158881											179.2	-0.00215268	0.00335528	-0.00303161
												179.4	0.0128717	0.00742087	0.00860015	0.00944604	0.00665043	0.0119932											179.4	0.00815092	0.00645323	0.0119238	0.00917223	0.0113143	0.0160584											179.4	-0.00296584	0.00237189	-0.00232713
												179.6	0.0136461	0.00808272	0.0081212	0.00878952	0.00644598	0.0125891											179.6	0.00886374	0.00704782	0.0124369	0.00876165	0.0113404	0.016132											179.6	-0.00272739	0.00192133	-0.0022404
												179.8	0.0135862	0.00749257	0.00855412	0.00864	0.00608977	0.0122418											179.8	0.00926569	0.007336	0.0135594	0.00883764	0.0112836	0.0158526											179.8	-0.00346431	0.00220794	-0.00246707
[truncated: 17 more columns]
