# Supplementary material for: 7,8-Dihydroxyflavone is a direct inhibitor of human and murine pyridoxal phosphatase
Source: eLife. 2024 Jun 10;13:RP93094. doi: 10.7554/eLife.93094 (PMC11164532; doi:10.7554/eLife.93094)
Supplement: Figure 2—source data 4. — Data are OD values and normalized data of malachite green assays. For calf intestinal phosphatase (CIP), kinetic data are OD values from pNPP-dephosphorylation assays. [file elife-93094-fig2-data4.xlsx]

## Sheet: to Fig 2d
Effect of 7,8-DHF on the phosphatase activity of different phosphatases
	PDXP																	PGP														LHPP
	Exp1																	Exp1														Exp1
	7,8 DHF [µM]	10	7.5	5	3.75	2.5	1.875	1.25	0.9375	0.625	0.46875	0.3125	0					7,8 DHF [µM]	40	20	10	7.5	5	3.75	2.5	1.875	1.25	0.9375	0.625	0		7,8 DHF [µM]	40	10	5	0
	Log 7,8 DHF [M]	-5	-5.12494	-5.30103	-5.42597	-5.60206	-5.727	-5.90309	-6.02803	-6.20412	-6.32906	-6.50515						Log 7,8 DHF [M]	-4.39794	-4.69897	-5	-5.12494	-5.30103	-5.42597	-5.60206	-5.727	-5.90309	-6.02803	-6.20412			Log 7,8 DHF [M]	-4.39794	-5	-5.30103
	PDXP	0.105	0.116	0.107	0.126	0.129	0.153	0.157	0.15	0.123	0.182	0.184	0.187					PGP	0.125	0.13	0.128	0.143	0.141	0.16	0.164	0.156	0.159	0.171	0.176	0.165		LHPP	0.157	0.15	0.157	0.152
	PDXP	0.113	0.117	0.096	0.126	0.128	0.146	0.148	0.151	0.152	0.148	0.179	0.175					PGP	0.125	0.138	0.14	0.129	0.152	0.153	0.157	0.16	0.154	0.158	0.161	0.154		LHPP	0.154	0.156	0.156	0.155
	Background	0.049	0.059	0.058	0.061	0.058	0.06	0.06	0.062	0.338	0.063	0.062	0.062					Background	0.06	0.073	0.073	0.073	0.075	0.077	0.076	0.074	0.076	0.077	0.075	0.075		Background	0.121	0.118	0.12	0.117
	Background	0.05	0.057	0.055	0.057	0.056	0.056	0.057	0.058	0.055	0.061	0.057	0.055					Background	0.067	0.074	0.076	0.078	0.077	0.078	0.076	0.074	0.076	0.073	0.07	0.065		Background	0.111	0.116	0.114	0.11
	PDXP-Background	0.0595	0.0585	0.045	0.067	0.0715	0.0915	0.094	0.0905	0.0825	0.103	0.122	0.1225					PGP-Background	0.0615	0.0605	0.0595	0.0605	0.0705	0.079	0.0845	0.084	0.0805	0.0895	0.096	0.0895		LHPP-Background	0.0395	0.036	0.0395	0.04
	normalized	0.485714	0.477551	0.367347	0.546939	0.583673	0.746939	0.767347	0.738776	0.673469	0.840816	0.995918	1					normalized	0.687151	0.675978	0.664804	0.675978	0.787709	0.882682	0.944134	0.938547	0.899441	1	1.07263	1		normalized	0.9875	0.9	0.9875	1
	Exp2																	Exp2														Exp2
	7,8 DHF [µM]	10	7.5	5	3.75	2.5	1.875	1.25	0.9375	0.625	0.46875	0.3125	0					7,8 DHF [µM]	40	20	10	7.5	5	3.75	2.5	1.875	1.25	0.9375	0.625	0		7,8 DHF [µM]	40	10	5	0
	Log 7,8 DHF [M]	-5	-5.12494	-5.30103	-5.42597	-5.60206	-5.727	-5.90309	-6.02803	-6.20412	-6.32906	-6.50515						Log 7,8 DHF [M]	-4.39794	-4.69897	-5	-5.12494	-5.30103	-5.42597	-5.60206	-5.727	-5.90309	-6.02803	-6.20412			Log 7,8 DHF [M]	-4.39794	-5	-5.30103
	PDXP	0.123	0.137	0.138	0.15	0.156	0.178	0.192	0.202	0.215	0.22	0.223	0.238					PGP	0.103	0.121	0.126	0.137	0.14	0.148	0.156	0.161	0.165	0.163	0.169	0.169		LHPP	0.584	0.12		0.294
	PDXP	0.135	0.139	0.14	0.158	0.158	0.17	0.192	0.207	0.209	0.22	0.22	0.23					PGP	0.116	0.129	0.128	0.142	0.14	0.151	0.151	0.151	0.154	0.159	0.16	0.158		LHPP	0.149	0.146		0.142
	Background	0.056	0.06	0.056	0.057	0.059	0.061	0.062	0.06	0.062	0.065	0.063	0.064					Background	0.053	0.062	0.063	0.075	0.075	0.078	0.079	0.078	0.078	0.083	0.079	0.075		Background	0.108	0.116		0.115
	Background	0.057	0.058	0.055	0.057	0.059	0.058	0.059	0.056	0.057	0.056	0.056	0.053					Background	0.069	0.076	0.076	0.078	0.076	0.077	0.071	0.072	0.075	0.075	0.072	0.066		Background	0.116	0.113		0.104
	PDXP-Background	0.0725	0.079	0.0835	0.097	0.098	0.1145	0.1315	0.1465	0.1525	0.1595	0.162	0.1755					PGP-Background	0.0485	0.056	0.0575	0.063	0.0645	0.072	0.0785	0.081	0.083	0.082	0.089	0.093		LHPP-Background	0.037	0.0315		0.0325
	normalized	0.413105	0.450142	0.475783	0.552707	0.558405	0.652422	0.749288	0.834758	0.868946	0.908832	0.923077	1					normalized	0.521505	0.602151	0.61828	0.677419	0.693548	0.774194	0.844086	0.870968	0.892473	0.88172	0.956989	1		normalized	1.13846	0.969231		1
	Exp3																	Exp3														Exp3
	7,8 DHF [µM]	10	7.5	5	3.75	2.5	1.875	1.25	0.9375	0.625	0.46875	0.3125	0					7,8 DHF [µM]	40	20	10	7.5	5	3.75	2.5	1.875	1.25	0.9375	0.625	0		7,8 DHF [µM]	40	10	5	0
	Log 7,8 DHF [M]	-5	-5.12494	-5.30103	-5.42597	-5.60206	-5.727	-5.90309	-6.02803	-6.20412	-6.32906	-6.50515						Log 7,8 DHF [M]	-4.39794	-4.69897	-5	-5.12494	-5.30103	-5.42597	-5.60206	-5.727	-5.90309	-6.02803	-6.20412			Log 7,8 DHF [M]	-4.39794	-5	-5.30103
	PDXP	0.128	0.127	0.124	0.139	0.144	0.165	0.164	0.184	0.19	0.207	0.203	0.206					PGP	0.115		0.13	0.144	0.169	0.15	0.165		0.163	0.161	0.166	0.173		LHPP	0.142	0.145	0.147	0.139
	PDXP	0.121	0.132	0.13	0.14	0.144	0.165	0.167	0.176	0.192	0.206	0.205	0.221					PGP	0.127		0.132	0.147	0.152	0.147	0.151		0.165	0.161	0.162	0.182		LHPP	0.14	0.138	0.134	0.13
	Background	0.053	0.064	0.066	0.062	0.062	0.064	0.068	0.065	0.069	0.067	0.066	0.068					Background	0.066		0.067	0.069	0.071	0.073	0.074		0.075	0.074	0.074	0.073		Background	0.106	0.109	0.112	0.108
	Background																	Background	0.075		0.068	0.069	0.069	0.068	0.068		0.072	0.076	0.07	0.067		Background	0.111	0.113	0.114	0.102
	PDXP-Background	0.0715	0.0655	0.061	0.0775	0.082	0.101	0.0975	0.115	0.122	0.1395	0.138	0.1455					PGP-Background	0.0505		0.0635	0.0765	0.0905	0.078	0.087		0.0905	0.086	0.092	0.1075		LHPP-Background	0.0325	0.0305	0.0275	0.0295
	normalized	0.491409	0.450172	0.419244	0.532646	0.563574	0.694158	0.670103	0.790378	0.838488	0.958763	0.948454	1					normalized	0.469767		0.590698	0.711628	0.84186	0.725581	0.809302		0.84186	0.8	0.855814	1		normalized	1.10169	1.0339	0.932203	1
	PHOP2						PSPH						MDP1
	Exp1						Exp1						Exp1
	7,8 DHF [µM]	40	10	5	0		7,8 DHF [µM]	40	10	5	0		7,8 DHF [µM]	40	10	5	0
	Log 7,8 DHF [M]	-4.39794	-5	-5.30103			Log 7,8 DHF [M]	-4.39794	-5	-5.30103			Log 7,8 DHF [M]	-4.39794	-5	-5.30103
	PHOP2	0.187	0.189	0.195	0.178		PSPH	0.12	0.132	0.135	0.132		MDP1	0.22	0.236	0.237	0.24
	PHOP2	0.182	0.187	0.191	0.174		PSPH	0.132	0.128	0.131	0.123		MDP1	0.249	0.247	0.242	0.237
	Background	0.116	0.13	0.13	0.117		Background	0.047	0.048	0.05	0.051		Background	0.086	0.09	0.09	0.092
	Background	0.117	0.122	0.134	0.111		Background	0.049	0.049	0.05	0.041		Background	0.09	0.091	0.09	0.083
	PHOP2-Background	0.068	0.062	0.061	0.062		PSPH-Background	0.078	0.0815	0.083	0.0815		MDP1-Background	0.1465	0.151	0.1495	0.151
	normalized	1.09677	1	0.983871	1		normalized	0.957055	1	1.0184	1		normalized	0.970199	1	0.990066	1
	Exp2						Exp2						Exp2
	7,8 DHF [µM]	40	10	5	0		7,8 DHF [µM]	40	10	5	0		7,8 DHF [µM]	40	10	5	0
	Log 7,8 DHF [M]	-4.39794	-5	-5.30103			Log 7,8 DHF [M]	-4.39794	-5	-5.30103			Log 7,8 DHF [M]	-4.39794	-5	-5.30103
	PHOP2	0.179	0.211	0.215	0.196		PSPH	0.121	0.126	0.126	0.127		MDP1	0.245	0.25	0.243	0.249
	PHOP2	0.209	0.21	0.202	0.2		PSPH	0.124	0.123	0.128	0.125		MDP1	0.232	0.24	0.225	0.246
	Background	0.106	0.113	0.111	0.106		Background	0.041	0.053	0.054	0.056		Background	0.085	0.095	0.087	0.094
	Background	0.111	0.108	0.111	0.098		Background	0.049	0.049	0.048	0.043		Background	0.091	0.262	0.088	0.086
	PHOP2-Background	0.1005	0.0995	0.091	0.098		PSPH-Background	0.0775	0.0735	0.076	0.0765		MDP1-Background	0.1505	0.15	0.1465	0.1575
	normalized	1.02551	1.01531	0.928571	1		normalized	1.01307	0.960784	0.993464	1		normalized	0.955556	0.952381	0.930159	1
	Exp3						Exp3						Exp3
	7,8 DHF [µM]	40	10	5	0		7,8 DHF [µM]	40	10	5	0		7,8 DHF [µM]	40	10	5	0
	Log 7,8 DHF [M]	-4.39794	-5	-5.30103			Log 7,8 DHF [M]	-4.39794	-5	-5.30103			Log 7,8 DHF [M]	-4.39794	-5	-5.30103
	PHOP2	0.236	0.242	0.23	0.231		PSP	0.13	0.118	0.125	0.122		MDP1	0.242	0.243	0.239	0.247
	PHOP2	0.241	0.24	0.249	0.243		PSP	0.12	0.117	0.119	0.115		MDP1	0.232	0.226	0.235	0.241
	Background	0.127	0.134	0.135	0.129		Background	0.045	0.058	0.053	0.052		Background	0.092	0.099	0.1	0.096
	Background	0.134	0.134	0.139	0.131		Background	0.05	0.051	0.055	0.048		Background	0.096	0.091	0.092	0.093
	PHOP2-Background	0.108	0.107	0.1025	0.107		PSP-Background	0.0775	0.063	0.068	0.0685		MDP1-Background	0.143	0.1395	0.141	0.1495
	normalized	1.00935	1	0.957944	1		normalized	1.13139	0.919708	0.992701	1		normalized	0.956522	0.93311	0.943144	1
NANP
	Exp1								Exp2								Exp3
	NANP 0.25µg				Background				NANP 0.25µg				Background				NANP 0.25µg				Background
7,8 DHF [µM]	0	5	10	40	0	40		7,8 DHF [µM]	0	5	10	40	0	40		7,8 DHF [µM]	0	5	10	40	0	40
	0.086	0.091	0.09	0.089	0.047	0.046			0.085	0.093	0.093	0.085	0.05	0.049			0.089	0.091	0.091	0.085	0.05	0.05
	0.081	0.084	0.088	0.078	0.044	0.054			0.089	0.088	0.094	0.086	0.048	0.044			0.089	0.088	0.089	0.084	0.048	0.044
mean	0.0835	0.0875	0.089	0.0835	0.0455	0.05		mean	0.087	0.0905	0.0935	0.0855	0.049	0.0465		mean	0.089	0.0895	0.09	0.0845	0.049	0.047
Mean -background	0.03575	0.03975	0.04125	0.03575		0.04775		Mean -background	0.03925	0.04275	0.04575	0.03775		0.04775		Mean -background	0.041	0.0415	0.042	0.0365		0.048
Exp1	0.03575	0.03975	0.04125	0.03575
Exp2	0.03925	0.04275	0.04575	0.03775
Exp3	0.041	0.0415	0.042	0.0365
mean at 7.8DHF=0	0.0386667
NORMALISATION
Exp1	0.924569	1.11189	1.15385	1
Exp2	1.01509	1.08917	1.16561	0.961783
Exp3	1.06034	1.0122	1.02439	0.890244
NT5C1A
	Exp1								Exp2								Exp3
	NT5C1A 20ng				Background				NT5C1A 20ng				Background				NT5C1A 20ng				Background
7,8 DHF [µM]	0	5	10	40	0	40		7,8 DHF [µM]	0	5	10	40	0	40		7,8 DHF [µM]	0	5	10	40	0	40
	0.109	0.084	0.069	0.057	0.05	0.052			0.101	0.093	0.072	0.056	0.05	0.053			0.096	0.084	0.072	0.056	0.051	0.057
	0.115	0.088	0.067	0.056	0.053	0.052			0.105	0.096	0.071	0.058	0.051	0.052			0.099	0.087	0.074	0.061	0.056	0.057
mean	0.112	0.086	0.068	0.0565	0.0515	0.052		mean	0.103	0.0945	0.0715	0.057	0.0505	0.0525		mean	0.0975	0.0855	0.073	0.0585	0.0535	0.057
mean - background	0.06025	0.03425	0.01625	0.00475		0.05175		mean - background	0.0515	0.043	0.02	0.0055		0.0515		mean - background	0.04225	0.03025	0.01775	0.00325		0.05525
7,8 DHF [µM]	0	5	10	40
Exp1	0.06025	0.03425	0.01625	0.00475
Exp2	0.0515	0.043	0.02	0.0055
Exp3	0.04225	0.03025	0.01775	0.00325
mean at 7.8DHF=0	0.0513333
NORMALISATION
Exp1	1.1737	0.568465	0.26971	0.0788382
Exp2	1.00325	0.834951	0.38835	0.106796
Exp3	0.823052	0.715976	0.420118	0.0769231
3 additional 7,8 DHF concentrations (2.5µM, 7.5µM, 25µM)
	Exp4								Exp5								Exp7
7,8 DHF [µM]	0	2.5	7.5	25				7,8 DHF [µM]	0	2.5	7.5	25				7,8 DHF [µM]	0	2.5	7.5	25
	0.129	0.126	0.09	0.067					0.087	0.084	0.074	0.054					0.128	0.103	0.094	0.059
	0.131	0.125	0.093	0.068					0.091	0.087	0.077	0.054					0.125	0.109	0.096	0.06
					Background								Background								Background
mean	0.13	0.1255	0.0915	0.0675	0.0526667			mean	0.089	0.0855	0.0755	0.054	0.0526667			mean	0.1265	0.106	0.095	0.0595	0.0526667
mean - background	0.0773333	0.0728333	0.0388333	0.0148333				mean - background	0.0363333	0.0328333	0.0228333	0.00133333				mean - background	0.0738333	0.0533333	0.0423333	0.00683333
Normalisation	1	0.94181	0.502155	0.19181				Normalisation	1	0.90367	0.62844	0.0366972				Normalisation	1	0.722348	0.573363	0.0925508
PNKP
	Exp1								Exp2								Exp3
	Prkp 0.01µg				Buffer				Prkp 0.01µg				Buffer				Prkp 0.01µg				Buffer
7,8 DHF [µM]	0	5	10	40	0	40		7,8 DHF [µM]	0	5	10	40	0	40		7,8 DHF [µM]	0	5	10	40	0	40
	0.081	0.078	0.074	0.065	0.045	0.05			0.076	0.076	0.074	0.076	0.044	0.051			0.081	0.082	0.079	0.076	0.053	0.05
	0.08	0.078	0.072	0.064	0.051	0.048			0.078	0.075	0.075	0.068	0.047	0.047			0.079	0.071	0.079	0.072	0.051	0.051
mean	0.0805	0.078	0.073	0.0645	0.048	0.049		mean	0.077	0.0755	0.0745	0.072	0.0455	0.049		mean	0.08	0.0765	0.079	0.074	0.052	0.0505
mean - background	0.032	0.0295	0.0245	0.016		0.0485		mean - background	0.032	0.0295	0.0245	0.016		0.04725		mean - background	0.02875	0.02525	0.02775	0.02275		0.05125
7,8 DHF [µM]	0	5	10	40
Exp1	0.032	0.0295	0.0245	0.016
Exp2	0.03375	0.03175	0.02975	0.02825
Exp3	0.02875	0.02525	0.02775	0.02275
mean at 7.8DHF=0	0.0315
NORMALISATION
Exp1	1.01587	0.921875	0.765625	0.5
Exp2	1.07143	0.940741	0.881481	0.837037
Exp3	0.912698	0.878261	0.965217	0.791304
PTP1B
	Exp1								Exp2								Exp3
	PTP1B 1.25ng				Buffer				PTP1B 1.25ng				Buffer				PTP1B 1.25ng				Buffer
7,8 DHF [µM]	0	5	10	40	0			7,8 DHF [µM]	0	5	10	40	0			7,8 DHF [µM]	0	5	10	40	0
	0.078	0.078	0.08	0.069	0.048				0.067	0.067	0.067	0.062	0.045				0.067	0.065	0.064	0.065	0.041
	0.076	0.078	0.076	0.069	0.056				0.067	0.068	0.066	0.062	0.053				0.063	0.068	0.071	0.063	0.045
									0.066	0.07	0.067	0.06	0.041					0.066	0.065	0.063	0.041
mean	0.077	0.078	0.078	0.069	0.052					0.07	0.067	0.06	0.04				0.064	0.064	0.067	0.065	0.134
mean - background	0.025	0.026	0.026	0.017				mean	0.0666667	0.06875	0.06675	0.061	0.04475			mean	0.0646667	0.06575	0.06675	0.064	0.0423333
7,8 DHF [µM]	0	5	10	40				mean - background	0.0219167	0.024	0.022	0.01625				mean - background	0.0223333	0.0234167	0.0244167	0.0216667
Exp1	0.025	0.026	0.026	0.017
Exp2	0.0219167	0.024	0.022	0.01625
Exp3	0.0223333	0.0234167	0.0244167	0.0216667
mean at 7.8DHF=0	0.0230833
NORMALISATION
Exp1	1.08303	1.04	1.04	0.68
Exp2	0.949459	1.09506	1.0038	0.741445
Exp3	0.967509	1.04851	1.09328	0.970149
PP2B
		Exp1								Exp2								Exp3
		PP2B 1U				Buffer				PP2B 1U				Buffer				PP2B 1U				Buffer
	7,8 DHF [µM]	0	5	10	40	0	40		7,8 DHF [µM]	0	5	10	40	0	40		7,8 DHF [µM]	0	5	10	40	0	40
		0.162	0.174	0.178	0.207	0.059	0.06			0.165	0.163	0.174	0.196	0.06	0.056			0.176	0.175	0.18	0.206	0.058	0.064
		0.165	0.173	0.18	0.208	0.058	0.058			0.171	0.167	0.184	0.201	0.058	0.057			0.176	0.175	0.186	0.208	0.058	0.064
	mean	0.1635	0.1735	0.179	0.2075	0.0585	0.059		mean	0.168	0.165	0.179	0.1985	0.059	0.0565		mean	0.176	0.175	0.183	0.207	0.058	0.064
	mean - background	0.10475	0.11475	0.12025	0.14875		0.05875		mean - background	0.11025	0.10725	0.12125	0.14075		0.05775		mean - background	0.115	0.114	0.122	0.146		0.061
7,8 DHF [µM]	0	5	10	40
Exp1	0.10475	0.11475	0.12025	0.14875
Exp2	0.11025	0.10725	0.12125	0.14075
Exp3	0.115	0.114	0.122	0.146
mean at 7.8DHF=0	0.11
NORMALISATION
Exp1	0.952273	1.09547	1.14797	1.42005
Exp2	1.00227	0.972789	1.09977	1.27664
Exp3	1.04545	0.991304	1.06087	1.26957
CIP
CIP 0.001U
78DHF µM	Well Row	Well Col	Content	Raw Data (405)	Raw Data (405)	Raw Data (405)	Raw Data (405)	Raw Data (405)	Raw Data (405)	Raw Data (405)	Raw Data (405)	Raw Data (405)	Raw Data (405)	Raw Data (405)	78DHF µM
			Time [s]	0	30	60	90	120	150	180	210	240	270	300		slope	mean slope	pNPP kinetic assay
0	A	1	Sample X1	0.061	0.083	0.094	0.107	0.107	0.114	0.128	0.142	0.16	0.173	0.191	0	0.393701	0.404233
5	A	2	Sample X2	0.074	0.096	0.107	0.115	0.114	0.123	0.135	0.149	0.164	0.178	0.193	5	0.358423	0.402725
10	A	3	Sample X3	0.064	0.09	0.095	0.105	0.111	0.121	0.138	0.15	0.169	0.183	0.2	10	0.421585	0.444328
40	A	4	Sample X4	0.08	0.09	0.097	0.106	0.12	0.133	0.15	0.159	0.174	0.185	0.197	40	0.403714	0.408213
0	B	1	Sample X5	0.077	0.09	0.097	0.113	0.117	0.129	0.146	0.159	0.174	0.188	0.202	0	0.414766
5	B	2	Sample X6	0.067	0.083	0.088	0.1	0.113	0.128	0.145	0.158	0.173	0.186	0.199	5	0.447027
10	B	3	Sample X7	0.061	0.09	0.097	0.111	0.123	0.138	0.154	0.167	0.181	0.194	0.207	10	0.467071
40	B	4	Sample X8	0.081	0.103	0.107	0.115	0.129	0.142	0.16	0.167	0.183	0.194	0.208	40	0.412712
78DHF µM	Well Row	Well Col	Content	Raw Data (405)	Raw Data (405)	Raw Data (405)	Raw Data (405)	Raw Data (405)	Raw Data (405)	Raw Data (405)	Raw Data (405)	Raw Data (405)	Raw Data (405)	Raw Data (405)	78DHF µM
			Time [s]	0	30	60	90	120	150	180	210	240	270	300		slope	mean slope
0	A	5	Sample X1	0.071	0.099	0.121	0.143	0.165	0.183	0.202	0.219	0.235	0.25	0.266	0	0.639386	0.627765
5	A	6	Sample X2	0.075	0.101	0.125	0.148	0.169	0.188	0.206	0.224	0.24	0.255	0.27	5	0.643915	0.649183
10	A	7	Sample X3	0.078	0.103	0.126	0.149	0.17	0.189	0.208	0.226	0.242	0.256	0.272	10	0.643087	0.62605
40	A	8	Sample X4	0.092	0.117	0.14	0.162	0.181	0.2	0.218	0.236	0.252	0.268	0.283	40	0.63012	0.635573
0	B	5	Sample X5	0.083	0.112	0.133	0.158	0.178	0.196	0.211	0.226	0.243	0.258	0.273	0	0.616143
5	B	6	Sample X6	0.079	0.105	0.128	0.15	0.173	0.192	0.212	0.229	0.246	0.261	0.276	5	0.65445
10	B	7	Sample X7	0.081	0.106	0.129	0.152	0.171	0.189	0.206	0.222	0.236	0.252	0.267	10	0.609013
40	B	8	Sample X8	0.092	0.119	0.143	0.166	0.184	0.204	0.222	0.24	0.256	0.273	0.287	40	0.641026
78DHF µM	Well Row	Well Col	Content	Raw Data (405)	Raw Data (405)	Raw Data (405)	Raw Data (405)	Raw Data (405)	Raw Data (405)	Raw Data (405)	Raw Data (405)	Raw Data (405)	Raw Data (405)	Raw Data (405)	78DHF µM
			Time [s]	0	30	60	90	120	150	180	210	240	270	300		slope	mean slope
0	A	1	Sample X1	0.056	0.09	0.106	0.13	0.149	0.169	0.189	0.204	0.221	0.238	0.253	0	0.639386	0.657075
5	A	2	Sample X2	0.069	0.095	0.115	0.138	0.159	0.178	0.197	0.213	0.23	0.246	0.261	5	0.635324	0.648788
10	A	3	Sample X3	0.056	0.075	0.114	0.137	0.157	0.175	0.196	0.21	0.224	0.245	0.255	10	0.66357	0.643118
40	A	4	Sample X4	0.096	0.126	0.145	0.165	0.183	0.201	0.209	0.228	0.24	0.255	0.265	40	0.544959	0.647292
0	B	1	Sample X5	0.062	0.086	0.115	0.138	0.16	0.18	0.2	0.218	0.234	0.251	0.264	0	0.674764
5	B	2	Sample X6	0.052	0.08	0.108	0.135	0.158	0.175	0.195	0.21	0.225	0.243	0.251	5	0.662252
10	B	3	Sample X7	0.075	0.1	0.119	0.145	0.166	0.186	0.203	0.218	0.233	0.25	0.261	10	0.622665
40	B	4	Sample X8	0.07	0.091	0.112	0.165	0.184	0.2	0.226	0.24	0.258	0.277	0.29	40	0.749625
7,8 DHF [µM]	0	5	10	40
Exp1	0.404233	0.402725	0.444328	0.408213
Exp2	0.627765	0.649183	0.62605	0.635573
Exp3	0.657075	0.648788	0.643118	0.647292
mean at 7.8DHF=0	0.563024
NORMALISATION
Exp1	0.717968	0.996269	1.09919	1.00984
Exp2	1.11499	1.03412	0.997269	1.01244
Exp3	1.16705	0.987388	0.978758	0.985112
