# Supplementary material for: 7,8-Dihydroxyflavone is a direct inhibitor of human and murine pyridoxal phosphatase
Source: eLife. 2024 Jun 10;13:RP93094. doi: 10.7554/eLife.93094 (PMC11164532; doi:10.7554/eLife.93094)
Supplement: Figure 3—figure supplement 1—source data 1. — Data are OD values and normalized data of malachite green assays, using pyridoxal 5’-phosphate (PLP) as a PDXP substrate. [file elife-93094-fig3-figsupp1-data1.xlsx]

## Sheet: to Fig 3-Fig Suppl 1d
PDXP-D14A
Exp1														Background
7,8 DHF [µM]	4e-05	2e-05	1e-05	5e-06	3.75e-06	2.5e-06	1.875e-06	1.25e-06	9.375e-07	6.25e-07	4.6875e-07	0		4e-05	0
	0.141	0.12	0.115	0.107	0.114	0.124	0.121	0.14	0.147	0.162	0.165	0.187		0.044	0.048
	0.136	0.122	0.108	0.107	0.112	0.116	0.127	0.144	0.145	0.161	0.161	0.173		0.046	0.044
Mean - background	0.093	0.0755	0.066	0.0615	0.0675	0.0745	0.0785	0.0965	0.1005	0.116	0.1175	0.1345			0.0455
Exp2
7,8 DHF [µM]	4e-05	2e-05	1e-05	5e-06	3.75e-06	2.5e-06	1.875e-06	1.25e-06	9.375e-07	6.25e-07	4.6875e-07	0
	0.125	0.118	0.107	0.108	0.112		0.129	0.145	0.159	0.164	0.165	0.184
	0.133	0.123	0.111	0.116	0.119	0.132	0.129	0.145	0.154	0.168	0.163	0.18
Mean - background	0.0835	0.075	0.0635	0.0665	0.07	0.0865	0.0835	0.0995	0.111	0.1205	0.1185	0.1365
Exp3
7,8 DHF [µM]	4e-05	2e-05	1e-05	5e-06	3.75e-06	2.5e-06	1.875e-06	1.25e-06	9.375e-07	6.25e-07	4.6875e-07	0
	0.136	0.127	0.11	0.114	0.118	0.129	0.136	0.153	0.163	0.173	0.179	0.197
	0.141	0.128	0.119	0.119	0.124	0.131	0.14	0.154	0.165	0.165	0.18	0.188
Mean - background	0.093	0.082	0.069	0.071	0.0755	0.0845	0.0925	0.108	0.1185	0.1235	0.134	0.147
