# Supplementary material for: 7,8-Dihydroxyflavone is a direct inhibitor of human and murine pyridoxal phosphatase
Source: eLife. 2024 Jun 10;13:RP93094. doi: 10.7554/eLife.93094 (PMC11164532; doi:10.7554/eLife.93094)
Supplement: Figure 3—source data 1. — Data are OD values and normalized data of malachite green assays, using pyridoxal 5’-phosphate (PLP) as a PDXP substrate. [file elife-93094-fig3-data1.xlsx]

## Sheet: to Fig 3g
	Phosphatase activity of PDXP and PDXP variants																7,8-DHF-sensitivity of PDXP and PDXP variants
																	WT PDXP
		Exp1															N60A PDXP
		time (min)	6	4	2	0			PDXP activity (OD)		Exp1	Exp2	Exp3				N60S PDXP
		WT PDXP 200ng	0.23	0.157	0.105	0.058				WT PDXP 200ng	0.0261	0.0262	0.0286					Exp1																				Exp2
		WT PDXP 200ng	0.224	0.176	0.113	0.063				N60A PDXP 600ng	0.0244	0.032	0.0228					7,8 DHF [µM]	10	7.5	5	3.75	2.5	1.875	1.25	0.9375	0.625	0.46875	0.3125	0	0.234375	0.15625	0.117188	0.078125	0.0585938	0		7,8 DHF [µM]	10	7.5	5	3.75	2.5	1.875	1.25	0.9375	0.625	0.46875	0.3125
		N60A PDXP 600ng	0.206	0.197	0.052	0.057				N60S PDXP 200ng	0.0223	0.0202	0.0252					7,8 DHF [logM]	-5	-5.12494	-5.30103	-5.42597	-5.60206	-5.727	-5.90309	-6.02803	-6.20412	-6.32906	-6.50515		-6.63009	-6.80618	-6.93112	-7.10721	-7.23215			7,8 DHF [logM]	-5	-5.12494	-5.30103	-5.42597	-5.60206	-5.727	-5.90309	-6.02803	-6.20412	-6.32906	-6.50515
		N60A PDXP 600ng	0.175	0.194	0.053	0.058				R62A PDXP 200ng	0.0242	0.0236	0.0271					Background	0.054	0.058	0.061	0.062	0.059	0.056	0.056	0.057	0.059	0.057	0.057	0.054	0.05	0.061	0.07	0.063	0.064	0.06		Background	0.049	0.054	0.057	0.057	0.059	0.06	0.062	0.062	0.064	0.064	0.064
		N60S PDXP 200ng	0.177	0.152	0.098	0.059				Y146A PDXP 150ng	0.0275	0.0272	0.0299					Background	0.058	0.058	0.059	0.062	0.052	0.052	0.054	0.055	0.055	0.056	0.056	0.051	0.06	0.059	0.061	0.059	0.059	0.05		Background	0.054	0.054	0.057	0.061	0.058	0.058	0.064	0.06	0.06	0.059	0.059
		N60S PDXP 200ng	0.173	0.15	0.1	0.06				E148A PDXP 200ng	0.0385	0.0358	0.0375					WT PDXP	0.138	0.148	0.156	0.156	0.172	0.184	0.21	0.212	0.229	0.229	0.238	0.244	0.151	0.157	0.163	0.167	0.166	0.176		WT PDXP	0.112	0.141	0.147	0.152	0.17	0.18	0.191	0.186	0.201	0.209	0.209
		R62A PDXP 200ng	0.187	0.153	0.099	0.05				H178A PDXP 500ng	0.023	0.0221	0.0302					WT PDXP	0.148	0.15	0.156	0.161	0.183	0.183	0.21	0.211	0.207	0.228	0.239	0.244	0.175	0.186	0.188	0.194	0.192	0.189		WT PDXP	0.115	0.126	0.148	0.149	0.167	0.176	0.193	0.187	0.198	0.193	0.203
		R62A PDXP 200ng	0.196	0.157	0.098	0.061												N60A PDXP	0.08	0.077	0.097	0.103	0.118	0.118	0.142	0.146	0.154	0.16	0.166	0.17	0.151	0.156	0.154	0.16	0.164	0.163		N60A PDXP	0.088	0.092	0.102	0.108	0.125	0.138	0.151	0.145	0.158	0.166	0.172
		Y146A PDXP 150ng	0.182	0.163	0.106	0.048			PDXP activity (nmol P/min/mg) (1 OD=0,17 nmol P)									N60A PDXP	0.074	0.089	0.094	0.096	0.116	0.123	0.139	0.15	0.15	0.157	0.16	0.162	0.151	0.152	0.156	0.154	0.156	0.156		N60A PDXP	0.095	0.092	0.103	0.107	0.087	0.141	0.152	0.155	0.163	0.169	0.169
		Y146A PDXP 150ng	0.198	0.172	0.107	0.063												N60S PDXP	0.066	0.075	0.08	0.083	0.096	0.104	0.128	0.137	0.153	0.168	0.178	0.19	0.158	0.167	0.157	0.178	0.18	0.184		N60S PDXP	0.069	0.072	0.079	0.083	0.095	0.107	0.124	0.128	0.153	0.164	0.182
		E148A PDXP 200ng	0.248	0.21	0.131	0.05					Exp1	Exp2	Exp3					N60S PDXP	0.074	0.075	0.082	0.087	0.099	0.104	0.127	0.139	0.164	0.168	0.183	0.203	0.167	0.173	0.177	0.176	0.179	0.177		N60S PDXP	0.076	0.074	0.083	0.088	0.101	0.109	0.132	0.139	0.173	0.174	0.187
		E148A PDXP 200ng	0.266	0.213	0.135	0.064				WT PDXP 200ng	767.647	770.588	841.176
		H178A PDXP 500ng	0.175	0.15	0.105	0.06				N60A PDXP 600ng	239.22	313.732	223.534				normalized	WT PDXP	0.454308	0.475196	0.501305	0.503916	0.637076	0.67624	0.809399	0.81201	0.840731	0.898172	0.950392	1	0.847059	0.87451	0.862745	0.937255	0.921569	1		WT PDXP	0.383901	0.49226	0.560372	0.566563	0.681115	0.736842	0.798762	0.77709	0.851393	0.863777	0.894737
		H178A PDXP 500ng	0.174	0.146	0.095	0.051	slope (0-2-4 min)			N60S PDXP 200ng	655.882	594.118	741.176					N60A PDXP	0.185022	0.220264	0.312775	0.330396	0.54185	0.585903	0.753304	0.810573	0.837004	0.898678	0.938326	1	0.91866	0.899522	0.856459	0.91866	0.942584	1		N60A PDXP	0.336134	0.319328	0.382353	0.407563	0.39916	0.676471	0.743697	0.747899	0.827731	0.890756	0.915966
		WT PDXP - Background	0.1665	0.106	0.0485	0	0.0261			R62A PDXP 200ng	711.765	694.118	797.059					N60S PDXP	0.0972222	0.118056	0.145833	0.159722	0.291667	0.347222	0.503472	0.569444	0.704861	0.774306	0.861111	1	0.856574	0.876494	0.808765	0.924303	0.940239	1		N60S PDXP	0.142857	0.129252	0.163265	0.180272	0.268707	0.333333	0.442177	0.493197	0.687075	0.731293	0.836735
		N60A PDXP - Background	0.133	0.138	-0.005	0				Y146A PDXP 150ng	1078.44	1066.67	1172.55
		N60S PDXP - Background	0.1155	0.0915	0.0395	0	0.0223			E148A PDXP 200ng	1132.35	1052.94	1102.94
		R62A PDXP - Background	0.136	0.0995	0.043	0	0.0242			H178A PDXP 500ng	270.588	260	355.294
		Y146A PDXP - Background	0.1345	0.112	0.051	0	0.0275
		E148A PDXP - Background	0.2	0.1545	0.076	0	0.0385										Y146A PDXP
		H178A PDXP - Background	0.119	0.0925	0.0445	0	0.023										H178A PDXP
																	R62A PDXP
		Exp2																Exp1								Exp2								Exp3
		time (min)	6	4	2	0												7,8 DHF [µM]	10	5	2.5	1.25	0.6	0		7,8 DHF [µM]	10	5	2.5	1.25	0.6	0		7,8 DHF [µM]	10	5	2.5	1.25	0.6	0
		WT PDXP 200ng	0.228	0.163	0.111	0.057												7,8 DHF [logM]	-5	-5.30103	-5.60206	-5.90309	-6.22185			7,8 DHF [logM]	-5	-5.30103	-5.60206	-5.90309	-6.22185			7,8 DHF [logM]	-5	-5.30103	-5.60206	-5.90309	-6.22185
		WT PDXP 200ng	0.235	0.163	0.112	0.06												Y146A PDXP	0.28	0.284	0.272	0.276	0.275	0.276		Y146A PDXP	0.319	0.308	0.301	0.296	0.303	0.306		Y146A PDXP	0.333	0.304	0.309	0.307	0.3	0.301
		N60A PDXP 600ng	0.176	0.153	0.102	0.056												Y146A PDXP	0.279	0.277	0.265	0.267	0.269	0.267		Y146A PDXP	0.314	0.299	0.299	0.306	0.289	0.303		Y146A PDXP	0.331	0.332	0.311	0.304	0.306	0.303
		N60A PDXP 600ng	0.188	0.157	0.107	0.058												H178A PDXP	0.161	0.179	0.173	0.18	0.193	0.193		H178A PDXP	0.191	0.225	0.193	0.219	0.224	0.22		H178A PDXP	0.243	0.246	0.249	0.248	0.248	0.26
		N60S PDXP 200ng	0.159	0.134	0.102	0.056												H178A PDXP	0.167	0.174	0.179	0.181	0.19	0.189		H178A PDXP	0.224	0.223	0.226	0.237	0.234	0.237		H178A PDXP	0.256	0.253	0.255	0.25	0.247	0.24
		N60S PDXP 200ng	0.163	0.14	0.107	0.062												R62A	0.199	0.207	0.211	0.214	0.217	0.214		R62A	0.204	0.213	0.22	0.225	0.219	0.224		R62A	0.222	0.215	0.22	0.216	0.221	0.227
		R62A PDXP 200ng	0.208	0.152	0.103	0.057												R62A	0.195	0.201	0.192	0.202	0.201	0.21		R62A	0.217	0.219	0.217	0.22	0.224	0.226		R62A	0.213	0.21	0.214	0.214	0.216	0.219
		R62A PDXP 200ng	0.202	0.157	0.114	0.064												Background	0.077	0.073	0.074	0.073	0.075	0.072		Background	0.068	0.065	0.066	0.065	0.066	0.064		Background	0.075	0.072	0.073	0.071	0.072	0.07
		Y146A PDXP 150ng	0.198	0.176	0.12	0.065												Background	0.073	0.068	0.07	0.07	0.069	0.065		Background	0.06	0.06	0.061	0.061	0.06	0.055		Background	0.068	0.066	0.066	0.068	0.064	0.059
		Y146A PDXP 150ng	0.188	0.159	0.105	0.052
		E148A PDXP 200ng	0.258	0.194	0.136	0.051											normalized	Y146A PDXP	1.00739	1.03448	0.96798	0.985222	0.985222	1		Y146A PDXP	1.03061	0.983673	0.965306	0.971429	0.95102	1		Y146A PDXP	1.09684	1.04842	1.01263	0.993684	0.989474	1
		E148A PDXP 200ng	0.25	0.194	0.143	0.062												H178A PDXP	0.726531	0.865306	0.84898	0.889796	0.97551	1		H178A PDXP	0.849112	0.955621	0.863905	0.976331	0.982249	1		H178A PDXP	0.959569	0.973046	0.983827	0.967655	0.967655	1
		H178A PDXP 500ng	0.174	0.146	0.105	0.053												R62A PDXP	0.850174	0.930314	0.902439	0.95122	0.954704	1		R62A PDXP	0.885196	0.927492	0.936556	0.963746	0.957704	1		R62A PDXP	0.921136	0.905363	0.930599	0.917981	0.949527	1
		H178A PDXP 500ng	0.183	0.143	0.11	0.064	slope (0-2-4 min)
		WT PDXP - Background	0.173	0.1045	0.053	0	0.0262
		N60A PDXP - Background	0.125	0.098	0.0475	0	0.0244
		N60S PDXP - Background	0.102	0.078	0.0455	0	0.0202
		R62A PDXP - Background	0.1445	0.094	0.048	0	0.0236										E148A PDXP
		Y146A PDXP - Background	0.1345	0.109	0.054	0	0.0272											Exp1										Exp2										Exp3
		E148A PDXP - Background	0.1975	0.1375	0.083	0	0.0358											7,8 DHF [µM]	0	0.15625	0.3125	0.625	1.25	2.5	5	10		7,8 DHF [µM]	0	0.15625	0.3125	0.625	1.25	2.5	5	10		7,8 DHF [µM]	0	0.15625	0.3125	0.625	1.25	2.5	5	10
		H178A PDXP - Background	0.12	0.086	0.049	0	0.0221											7,8 DHF [logM]		-6.80618	-6.50515	-6.20412	-5.90309	-5.60206	-5.30103	-5		7,8 DHF [logM]		-6.80618	-6.50515	-6.20412	-5.90309	-5.60206	-5.30103	-5		7,8 DHF [logM]		-6.80618	-6.50515	-6.20412	-5.90309	-5.60206	-5.30103	-5
																		Background	0.07	0.075	0.072	0.075	0.071	0.076	0.069	0.082		Background	0.072	0.08	0.071	0.082	0.074	0.075	0.072	0.076		Background	0.074	0.078	0.072	0.08	0.074	0.079	0.072	0.078
		Exp3																Background	0.075	0.074	0.076	0.076	0.076	0.075	0.08	0.078		Background	0.085	0.081	0.083	0.079	0.08	0.077	0.085	0.081		Background	0.08	0.077	0.08	0.077	0.079	0.077	0.08	0.08
		time (min)	6	4	2	0												E148A PDXP	0.19	0.186	0.176	0.187	0.188	0.18	0.184	0.183		E148A PDXP 100ng	0.175	0.169	0.176	0.172	0.18	0.17	0.176	0.16		E148A PDXP 100ng	0.172	0.173	0.172	0.174	0.17	0.169	0.172	0.164
		WT PDXP 200ng	0.239	0.177	0.114	0.066												E148A PDXP	0.189	0.188	0.188	0.185	0.192	0.184	0.184	0.177		E148A PDXP 100ng	0.177	0.172	0.183	0.173	0.175	0.175	0.179	0.17		E148A PDXP 100ng	0.176	0.168	0.174	0.168	0.177	0.167	0.174	0.161
		WT PDXP 200ng	0.238	0.194	0.114	0.067
		N60A PDXP 600ng	0.206	0.208	0.1	0.064											normalized	E148A PDXP	1	0.961538	0.923077	0.944444	0.995726	0.910256	0.935897	0.854701		E148A PDXP norm	1	0.923077	1.05128	0.94359	1.03077	0.989744	1.01538	0.887179		E148A PDXP norm	1	0.958763	1	0.953608	1	0.927835	1	0.860825
		N60A PDXP 600ng	0.213	0.207	0.102	0.067
		N60S PDXP 200ng	0.211	0.18	0.099	0.067
		N60S PDXP 200ng	0.211	0.186	0.101	0.076
		R62A PDXP 200ng	0.223	0.189	0.099	0.073
		R62A PDXP 200ng	0.22	0.2	0.114	0.077
		Y146A PDXP 150ng	0.223	0.195	0.113	0.076
		Y146A PDXP 150ng	0.228	0.196	0.111	0.06
		E148A PDXP 200ng	0.277	0.233	0.145	0.075
		E148A PDXP 200ng	0.28	0.232	0.14	0.06
		H178A PDXP 500ng	0.234	0.196	0.11	0.071
		H178A PDXP 500ng	0.227	0.195	0.102	0.059
		N60A PDXP 600ng	0.262	0.229	0.121	0.076
		N60A PDXP 600ng	0.264	0.231	0.105	0.059	slope (0-2-4 min)
		WT PDXP - Background	0.172	0.119	0.0475	0	0.0286
		N60A PDXP - Background	0.144	0.142	0.0355	0	0.032
		N60S PDXP - Background	0.1395	0.1115	0.0285	0	0.0252
		R62A PDXP - Background	0.1465	0.1195	0.0315	0	0.0271
		Y146A PDXP - Background	0.1575	0.1275	0.044	0	0.0299
		E148A PDXP - Background	0.211	0.165	0.075	0	0.0375
		H178A PDXP - Background	0.1655	0.1305	0.041	0	0.0302
		N60A Background	0.1955	0.1625	0.0455	0	0.0228
[truncated: 26 more columns]
