# Supplementary material for: 7,8-Dihydroxyflavone is a direct inhibitor of human and murine pyridoxal phosphatase
Source: eLife. 2024 Jun 10;13:RP93094. doi: 10.7554/eLife.93094 (PMC11164532; doi:10.7554/eLife.93094)
Supplement: Figure 4—source data 1. — Data are from high-performance liquid chromatography (HPLC)-based measurements. [file elife-93094-fig4-data1.xlsx]

## Sheet: to Fig 4a, 4c
	Quantification of PLP and PLP/PL levels in hippocampal neurons of PDXP-WT and PDXP-KO mice, in the absence or presence of 7,8-DHF
Exp1
PLP				PA				PL
		Area				Area				Area
		counts*min				counts*min				counts*min
		Emission_1				Emission_1				Emission_1
		[2,91..3,06]				[4,93..5,18]				[6,79..7,14]
	KO1 7,8-DHF 20µM	8284287			KO1 7,8-DHF 20µM	2449521			KO1 7,8-DHF 20µM	2012596
	KO1 DMSO	5138846			KO1 DMSO	2736852			KO1 DMSO	1113702
	Standard curve								Standard curve
PLP (nM)	31.25	221570			PA 4µM	3215421		PL (nM)	31.25	481710
	62.5	432997				3313688			62.5	1090499
	125	1152156				4203920			125	2936469
	250	1789951				2730984			250	4355883
PLP fluorescence corrected by PA fluorescence signal								PL fluorescence corrected by PA fluorescence signal
	KO1 7,8-DHF 20µM	3.382							78DHF	0.821628
	KO1 DMSO	1.87765							DMSO	0.406928
	Standard curve								Standard curve
PLP (nM)	31.25	0.0689086						PL (nM)	31.25	0.149812
	62.5	0.130669							62.5	0.329089
	125	0.274067							125	0.698507
	250	0.655423							250	1.59499
			PLP nM	PL nM	protein g/L	PLP nmol/g	PL nmol/g	PLP/PL
		KO1 7,8-DHF 20µM	1346.87	133.381	0.95	1417.76	140.401	10.0979
		KO1 DMSO	747.769	66.0598	0.66	1132.98	100.091	11.3196
Epx2
PLP				PA				PL
		Area				Area				Area
		counts*min				counts*min				counts*min
		Emission_1				Emission_1				Emission_1
		[2,85..2,99]				[4,73..4,97]				[6,51..6,85]
	WT1 DishA DMSO	3511311			WT1 DishA DMSO	3983788			WT1 DishA DMSO	2782633
	WT1 DishA 7,8-DHF 20µM	3050112			WT1 DishA 7,8-DHF 20µM	4250219			WT1 DishA 7,8-DHF 20µM	1512482
	KO2 DishA DMSO	10933737			KO2 DishA DMSO	4561220			KO2 DishA DMSO	4008317
	KO2 DishA 7,8-DHF 20µM	9889929			KO2 DishA 7,8-DHF 20µM	4904564			KO2 DishA 7,8-DHF 20µM	4250814
	KO3 DishA DMSO	19159244			KO3 DishA DMSO	6045548			KO3 DishA DMSO	8306355
	KO3 DishA 7,8-DHF 20µM	17458116			KO3 DishA 7,8-DHF 20µM	4660889			KO3 DishA 7,8-DHF 20µM	7572440
	WT1 DishB DMSO	4449751			WT1 DishB DMSO	4335917			WT1 DishB DMSO	2438140
	WT1 DishB 7,8-DHF 20µM	5544940			WT1 DishB 7,8-DHF 20µM	5603586			WT1 DishB 7,8-DHF 20µM	2935022
	KO2 DihsB DMSO	10937917			KO2 DihsB DMSO	4966970			KO2 DihsB DMSO	4546372
	KO2 DishB 7,8-DHF 20µM	12614406			KO2 DishB 7,8-DHF 20µM	4808010			KO2 DishB 7,8-DHF 20µM	5205243
	KO3 DishB DMSO	14082270			KO3 DishB DMSO	3962759			KO3 DishB DMSO	5846970
	KO3 DishB 7,8-DHF 20µM	13409318			KO3 DishB 7,8-DHF 20µM	4502243			KO3 DishB 7,8-DHF 20µM	4933022
	Standard curve								Standard curve
PLP (nM)	31.25	1503658			PA 4µM	5466103		PL (nM)	31.25	4341618
	62.5	3030221				5105250			62.5	8431123
	125	6685419				4440165			125	17250446
	250	11466322				4062848			250	28818519
PLP fluorescence corrected by PA fluorescence signal
	WT1 DishA DMSO	0.8814							WT1 DishA DMSO	0.698489
	WT1 DishA 7,8-DHF 20µM	0.717636							WT1 DishA 7,8-DHF 20µM	0.35586
	KO2 DishA DMSO	2.39711							KO2 DishA DMSO	0.878782
	KO2 DishA 7,8-DHF 20µM	2.01647							KO2 DishA 7,8-DHF 20µM	0.866706
	KO3 DishA DMSO	3.16915							KO3 DishA DMSO	1.37396
	KO3 DishA 7,8-DHF 20µM	3.74566							KO3 DishA 7,8-DHF 20µM	1.62468
	WT1 DishB DMSO	1.02625							WT1 DishB DMSO	0.562312
	WT1 DishB 7,8-DHF 20µM	0.989534							WT1 DishB 7,8-DHF 20µM	0.523776
	KO2 DihsB DMSO	2.20213							KO2 DihsB DMSO	0.915321
	KO2 DishB 7,8-DHF 20µM	2.62362							KO2 DishB 7,8-DHF 20µM	1.08262
	KO3 DishB DMSO	3.55365							KO3 DishB DMSO	1.47548
	KO3 DishB 7,8-DHF 20µM	2.97836							KO3 DishB 7,8-DHF 20µM	1.09568
	Standard curve								Standard curve
PLP (nM)	31.25	0.275088						PL (nM)	31.25	0.79428
	62.5	0.59355							62.5	1.65146
	125	1.50567							125	3.88509
	250	2.82224							250	7.09318
		PLP nM	PL nM	PLP/PL	g/l	PLP /g protein	PL /g	PLP/g protein mean	PL/g	PLP/PL
	WT1 DishA DMSO	311.559	97.1608	3.20663	0.951054	327.593	102.161	346.93	90.5678	3.92222
	WT1 DishA 7,8-DHF 20µM	253.671	49.5006	5.12461	0.77841	325.884	63.5919	337.918	68.2426	4.96275
	KO2 DishA DMSO	847.334	122.24	6.93174	1.06918	792.509	114.331	753.2	115.55	6.52273
	KO2 DishA 7,8-DHF 20µM	712.787	120.56	5.9123	0.826872	862.029	145.803	839.269	139.195	6.0353
	KO3 DishA DMSO	1120.24	191.12	5.86143	1.21153	924.643	157.751	979.443	163.367	5.9909
	KO3 DishA 7,8-DHF 20µM	1324.02	225.995	5.85864	1.2085	1095.59	187.004	980.122	156.089	6.38314
	WT1 DishB DMSO	362.762	78.2184	4.63781	0.990429	366.268	78.9743
	WT1 DishB 7,8-DHF 20µM	349.782	72.8579	4.80088	0.999515	349.952	72.8933
	KO2 DihsB DMSO	778.413	127.322	6.11372	1.09038	713.891	116.769
	KO2 DishB 7,8-DHF 20µM	927.403	150.594	6.15831	1.13581	816.51	132.587
	KO3 DishB DMSO	1256.15	205.241	6.12037	1.21456	1034.24	168.984
	KO3 DishB 7,8-DHF 20µM	1052.8	152.411	6.90763	1.21759	864.656	125.174
Exp3
PLP				PA				PL
		Area				Area				Area
		counts*min				counts*min				counts*min
		Emission_1				Emission_1				Emission_1
		[2,81..2,96]				[4,69..4,93]				[6,47..6,80]
	WT2 DMSO	3726260			WT2 DMSO	6885513			WT2 DMSO	2075867
	WT2 7,8-DHF 20µM	4223306			WT2 7,8-DHF 20µM	9702219			WT2 7,8-DHF 20µM	2153050
	KO4 DMSO	19439294			KO4 DMSO	11364798			KO4 DMSO	4109622
	KO4 7,8-DHF 20µM	14195877			KO4 7,8-DHF 20µM	11174276			KO4 7,8-DHF 20µM	3402133
	WT3 DMSO	13035086			WT3 DMSO	12426047			WT3 DMSO	5204067
	WT3 7,8-DHF 20µM	8739512			WT3 7,8-DHF 20µM	9962379			WT3 7,8-DHF 20µM	3054223
	WT4 DMSO	6800041			WT4 DMSO	11237373			WT4 DMSO	2920071
	WT4 7,8-DHF 20µM	5278011			WT4 7,8-DHF 20µM	5479087			WT4 7,8-DHF 20µM	1900532
	Standard curve								Standard curve
PLP (nM)	125	2336165			PA 4µM	8205268		PL (nM)	125	5357539
	250	6041586				9695412			250	14197093
	500	11239648				8210673			500	26289542
	1000	30838615				10325049			1000	75214825
PLP fluorescence corrected by PA fluorescence signal								PL fluorescence corrected by PA fluorescence signal
	WT2 DMSO	0.541174							WT2 DMSO	0.301483
	WT2 7,8-DHF 20µM	0.435293							WT2 7,8-DHF 20µM	0.221913
	KO4 DMSO	1.71048							KO4 DMSO	0.36161
	KO4 7,8-DHF 20µM	1.27041							KO4 7,8-DHF 20µM	0.304461
	WT3 DMSO	1.04901							WT3 DMSO	0.418803
	WT3 7,8-DHF 20µM	0.877252							WT3 7,8-DHF 20µM	0.306576
	WT4 DMSO	0.605127							WT4 DMSO	0.259854
	WT4 7,8-DHF 20µM	0.963301							WT4 7,8-DHF 20µM	0.34687
	Standard curve								Standard curve
PLP (nM)	125	0.284715						PL (nM)	125	0.652939
	250	0.623139							250	1.46431
	500	1.36891							500	3.20187
	1000	2.98678							1000	7.28469
		PLP nM	PL nM	g/l	PLP/g protein	PL/g protein	PLP/PL
	WT2 DMSO	186.098	42.9036	0.42	443.091	102.151	4.3376
	WT2 7,8-DHF 20µM	149.688	31.5801	0.4	374.22	78.9502	4.73995
	KO4 DMSO	588.199	51.46	0.41	1434.63	125.512	11.4302
	KO4 7,8-DHF 20µM	436.866	43.3273	0.41	1065.53	105.676	10.0829
	WT3 DMSO	360.734	59.5991	0.69	522.802	86.3756	6.05266
	WT3 7,8-DHF 20µM	301.668	43.6282	0.53	569.186	82.3174	6.91452
	WT4 DMSO	208.091	36.9793	0.46	452.371	80.3898	5.62722
	WT4 7,8-DHF 20µM	331.259	49.3625	0.51	649.527	96.7892	6.71074
