# Supplementary material for: 7,8-Dihydroxyflavone is a direct inhibitor of human and murine pyridoxal phosphatase
Source: eLife. 2024 Jun 10;13:RP93094. doi: 10.7554/eLife.93094 (PMC11164532; doi:10.7554/eLife.93094)
Supplement: Figure 4—source data 2. — Densitometric quantification of pyridoxal kinase (PDXK) and actin levels in hippocampal neurons derived from pyridoxal 5’-phosphate phosphatase (PDXP)-WT and knockout of PDXP (PDXP-KO) mice. [file elife-93094-fig4-data2.xlsx]

## Sheet: to Fig 4b
	Quantification of Western blots.
	PDXK			signal				signal - background		signal - background normalized			PDXK/ACTIN
		1	0.148	4903566	1128	22730	WT	3741733		0.704436	WT		0.736778
		2	0.148	5824332	1124	26423	KO	4642251		0.873972	KO		0.781028
		3	0.148	6437671	1160	24986	WT	5252941		0.988944	WT		0.892988			anti-PDXP
		4	0.148	9854224	1142	38860	KO	8649453		1.62839	KO		1.40762
		5	0.148	8380564	1105	34511	WT	7201704		1.35583	WT		1.19239
		6	0.148	1624348	1092	3786	KO	483718		0.0910671	KO		0.330327
		7	0.148	7908217	1115	32716	WT	6763622		1.27335	WT		1.0854
		8	0.148	6917926	1126	29533	KO	5757927		1.08401	KO		1.00868
	Background	9	0.148	1161833	1107	1236	mean	5.31167e+06
		10	0.148	1182081	1104	1427
		11	0.148	1184730	1094	1374
		12	0.148	1204771	1102	1582
		13	0.148	1178860	1073	1538
		14	0.148	1140630	1085	1239
		15	0.148	1144595	1084	1251
		16	0.148	1159999	1099	1303
				signal actin				signal - background		signal - background normalized
	Actin	1	3848	31466	2	127	WT	29059		0.956104
		2	3848	36310	2	127	KO	34010		1.119						anti-PDXK
		3	3848	35844	2	127	WT	33659		1.10745						short exposure														anti-PDXK
		4	3848	37629	2	127	KO	35160		1.15684																				longer exposure
		5	3848	37537	2	127	WT	34559		1.13707
		6	3848	11366	2	110	KO	8379		0.275687
		7	3848	38629	2	127	WT	35656		1.17316
		8	3848	35489	2	127	KO	32663		1.07468
	Background	9	3848	2407	2	3	mean	30393.1
		10	3848	2300	2	3
		11	3848	2185	2	3
		12	3848	2469	2	3
		13	3848	2978	2	4
		14	3848	2987	2	4
		15	3848	2973	2	4
		16	3848	2826	2	4
																anti-actin
