# Supplementary material for: 7,8-Dihydroxyflavone is a direct inhibitor of human and murine pyridoxal phosphatase
Source: eLife. 2024 Jun 10;13:RP93094. doi: 10.7554/eLife.93094 (PMC11164532; doi:10.7554/eLife.93094)
Supplement: Table 1—source data 1. — Data are OD values of malachite green assays, using PLP as a PDXP substrate, and derived kinetic constants. [file elife-93094-table1-data1.xlsx]

## Sheet: Data Exp1-6
	17.1.20; assay 8452; (Nr. 1)
	PLP-Konzentration in uM:	50	37.5	25	18.75	12.5	9.375	6.25	4.6875	3.125	2.34375	1.5625	0
	kein D5446	0.167	0.177	0.186	0.165	0.123	0.131	0.091	0.091	0.075	0.077	0.067	0.059
	kein D5446	0.185	0.184	0.157	0.161	0.127	0.128	0.091	0.083	0.072	0.071	0.062	0.048
	1µM D5446	0.14	0.161	0.131	0.143	0.111	0.116	0.09	0.086	0.074	0.075	0.067	0.061
	1µM D5446	0.162	0.159	0.136	0.142	0.106	0.112	0.09	0.08	0.068	0.064	0.059	0.048
	1,5µM D5446	0.176	0.171	0.151	0.147	0.119	0.121	0.09	0.071	0.076	0.075	0.069	0.06
	1,5µM D5446	0.167	0.176	0.145	0.149	0.115	0.121	0.084	0.081	0.068	0.068	0.061	0.05
	2µM D5446	0.13	0.155	0.13	0.134	0.108	0.104	0.084	0.088	0.073	0.075	0.067	0.06
	2µM D5446	0.15	0.165	0.132	0.133	0.11	0.107	0.083	0.08	0.083	0.072	0.061	0.05
	Mittelwert kein D5446	0.176	0.1805	0.1715	0.163	0.125	0.1295	0.091	0.087	0.0735	0.074	0.0645	0.0535
	Mittelwert 1µM D5446	0.151	0.16	0.1335	0.1425	0.1085	0.114	0.09	0.083	0.071	0.0695	0.063	0.0545
	Mittelwert 1,5µM D5446	0.1715	0.1735	0.148	0.148	0.117	0.121	0.087	0.076	0.072	0.0715	0.065	0.055
	Mittelwert 2µM D5446	0.14	0.16	0.131	0.1335	0.109	0.1055	0.0835	0.084	0.078	0.0735	0.064	0.055
	Mittelwert 13.1.20	0.143	0.142	0.1415	0.13	0.13	0.1135	0.0935	0.0755	0.049	0.0355	0.0195	0
exp 1
	PLP(µM)	100	75	50	37.5	25	18.75	12.5	9.375	6.25	4.6875	3.125	0
PDXP	DMSO	0.189	0.195	0.165	0.172	0.155	0.155	0.137	0.127	0.104	0.083	0.08	0.058
		0.205	0.201	0.187	0.183	0.159	0.152	0.123	0.129	0.102	0.088	0.078	0.046
	1µM 7.8-DHF	0.189	0.184	0.16	0.125	0.143	0.124	0.106	0.091	0.084	0.076	0.071	0.06
		0.189	0.175	0.156	0.13	0.137	0.117	0.105	0.088	0.075	0.068	0.064	0.048
	1,5µM 7.8-DHF	0.175	0.171	0.159	0.144	0.125	0.117	0.1	0.088	0.081	0.072	0.07	0.059
		0.177	0.157	0.142	0.128	0.111	0.098	0.098	0.089	0.077	0.069	0.065	0.049
	2µM 7.8-DHF	0.141	0.158	0.134	0.124	0.109	0.099	0.1	0.09	0.082	0.076	0.069	0.058
		0.187	0.176	0.162	0.14	0.123	0.116	0.091	0.086	0.079	0.071	0.065	0.049
	Background	0.066	0.067	0.063	0.062	0.06	0.06	0.061	0.059	0.061	0.061	0.061	0.057
		0.072	0.065	0.061	0.058	0.057	0.057	0.058	0.057	0.056	0.056	0.056	0.046
		0.062	0.06	0.056	0.054	0.052	0.053	0.051	0.052	0.054	0.051	0.051	0.047
		0.054	0.058	0.053	0.054	0.047	0.052	0.049	0.05	0.049	0.05	0.048	0.049
	Mean Background	0.0635	0.0625	0.05825	0.057	0.054	0.0555	0.05475	0.0545	0.055	0.0545	0.054	0.04975
PDXP - background	DMSO	0.1255	0.1325	0.10675	0.115	0.101	0.0995	0.08225	0.0725	0.049	0.0285	0.026	0.00825
		0.1415	0.1385	0.12875	0.126	0.105	0.0965	0.06825	0.0745	0.047	0.0335	0.024	-0.00375
	1µM 7.8-DHF	0.1255	0.1215	0.10175	0.068	0.089	0.0685	0.05125	0.0365	0.029	0.0215	0.017	0.01025
		0.1255	0.1125	0.09775	0.073	0.083	0.0615	0.05025	0.0335	0.02	0.0135	0.01	-0.00175
	1,5µM 7.8-DHF	0.1115	0.1085	0.10075	0.087	0.071	0.0615	0.04525	0.0335	0.026	0.0175	0.016	0.00925
		0.1135	0.0945	0.08375	0.071	0.057	0.0425	0.04325	0.0345	0.022	0.0145	0.011	-0.00075
	2µM 7.8-DHF	0.0775	0.0955	0.07575	0.067	0.055	0.0435	0.04525	0.0355	0.027	0.0215	0.015	0.00825
		0.1235	0.1135	0.10375	0.083	0.069	0.0605	0.03625	0.0315	0.024	0.0165	0.011	-0.00075
Exp2
	PLP(µM)	100	75	50	37.5	25	18.75	12.5	9.375	6.25	4.6875	3.125	0
PDXP	DMSO	0.22	0.214	0.208	0.197	0.195	0.175	0.155	0.135	0.116	0.1	0.088	0.056
		0.218	0.218	0.215	0.202	0.197	0.177	0.163	0.142	0.118	0.097	0.084	0.045
	1µM 7.8-DHF	0.206	0.197	0.191	0.182	0.177	0.165	0.133	0.129	0.115	0.1	0.093	0.06
		0.205	0.198	0.188	0.182	0.174	0.159	0.134	0.122	0.106	0.094	0.082	0.047
	1,5µM 7.8-DHF	0.197	0.198	0.185	0.175	0.166	0.151	0.131	0.115	0.107	0.093	0.087	0.061
		0.211	0.195	0.181	0.167	0.164	0.151	0.109	0.117	0.093	0.082	0.073	0.049
	2µM 7.8-DHF	0.183	0.178	0.174	0.156	0.153	0.144	0.114	0.109	0.101	0.085	0.084	0.058
		0.19	0.194	0.173	0.158	0.146	0.136	0.124	0.11	0.096	0.084	0.075	0.049
PDXP - background	DMSO	0.1565	0.1515	0.14975	0.14	0.141	0.1195	0.10025	0.0805	0.061	0.0455	0.034	0.00625
		0.1545	0.1555	0.15675	0.145	0.143	0.1215	0.10825	0.0875	0.063	0.0425	0.03	-0.00475
	1µM 7.8-DHF	0.1425	0.1345	0.13275	0.125	0.123	0.1095	0.07825	0.0745	0.06	0.0455	0.039	0.01025
		0.1415	0.1355	0.12975	0.125	0.12	0.1035	0.07925	0.0675	0.051	0.0395	0.028	-0.00275
	1,5µM 7.8-DHF	0.1335	0.1355	0.12675	0.118	0.112	0.0955	0.07625	0.0605	0.052	0.0385	0.033	0.01125
		0.1475	0.1325	0.12275	0.11	0.11	0.0955	0.05425	0.0625	0.038	0.0275	0.019	-0.00075
	2µM 7.8-DHF	0.1195	0.1155	0.11575	0.099	0.099	0.0885	0.05925	0.0545	0.046	0.0305	0.03	0.00825
		0.1265	0.1315	0.11475	0.101	0.092	0.0805	0.06925	0.0555	0.041	0.0295	0.021	-0.00075
Exp3
	PLP(µM)	100	75	50	37.5	25	18.75	12.5	9.375	6.25	4.6875	3.125	0
PDXP	DMSO	0.218	0.203	0.192	0.183	0.174	0.168	0.145	0.139	0.108	0.113	0.083	0.06
		0.212	0.21	0.198	0.186	0.173	0.169	0.147	0.096	0.106	0.085	0.076	0.049
	1µM 7.8-DHF	0.2	0.197	0.184	0.174	0.159	0.155	0.135	0.129	0.104	0.099	0.083	0.064
		0.208	0.198	0.184	0.176	0.164	0.155	0.13	0.122	0.096	0.092	0.076	0.051
	1,5µM 7.8-DHF	0.188	0.18	0.171	0.15	0.143	0.13	0.133	0.122	0.102	0.096	0.084	0.064
		0.197	0.186	0.175	0.163	0.156	0.145	0.125	0.12	0.098	0.092	0.077	0.051
	2µM 7.8-DHF	0.184	0.18	0.171	0.164	0.153	0.145	0.126	0.12	0.103	0.098	0.084	0.064
		0.202	0.199	0.181	0.177	0.161	0.155	0.123	0.12	0.098	0.092	0.075	0.052
PDXP - background	DMSO	0.1545	0.1405	0.13375	0.126	0.12	0.1125	0.09025	0.0845	0.053	0.0585	0.029	0.01025
		0.1485	0.1475	0.13975	0.129	0.119	0.1135	0.09225	0.0415	0.051	0.0305	0.022	-0.00075
	1µM 7.8-DHF	0.1365	0.1345	0.12575	0.117	0.105	0.0995	0.08025	0.0745	0.049	0.0445	0.029	0.01425
		0.1445	0.1355	0.12575	0.119	0.11	0.0995	0.07525	0.0675	0.041	0.0375	0.022	0.00125
	1,5µM 7.8-DHF	0.1245	0.1175	0.11275	0.093	0.089	0.0745	0.07825	0.0675	0.047	0.0415	0.03	0.01425
		0.1335	0.1235	0.11675	0.106	0.102	0.0895	0.07025	0.0655	0.043	0.0375	0.023	0.00125
	2µM 7.8-DHF	0.1205	0.1175	0.11275	0.107	0.099	0.0895	0.07125	0.0655	0.048	0.0435	0.03	0.01425
		0.1385	0.1365	0.12275	0.12	0.107	0.0995	0.06825	0.0655	0.043	0.0375	0.021	0.00225
Exp4
	PLP(µM)	100	75	50	37.5	25	18.75	12.5	9.375	6.25	4.6875	3.125	0
PDXP	DMSO	0.229	0.216	0.205	0.199	0.186	0.177	0.138	0.13	0.091	0.092	0.074	0.054
		0.216	0.217	0.201	0.195	0.176	0.174	0.14	0.131	0.085	0.086	0.074	0.046
	3µM 7.8-DHF	0.168	0.164	0.141	0.137	0.124	0.119	0.101	0.097	0.082	0.081	0.079	0.065
		0.159	0.166	0.149	0.139	0.124	0.116	0.099	0.092	0.077	0.075	0.064	0.049
	5µM 7.8-DHF	0.156	0.151	0.134	0.129	0.114	0.106	0.102	0.088	0.071	0.073	0.069	0.057
		0.166	0.158	0.133	0.131	0.112	0.104	0.091	0.082	0.069	0.076	0.066	0.049
	10µM 7.8-DHF	0.139	0.145	0.123	0.12	0.106	0.1	0.091	0.088	0.073	0.072	0.068	0.058
		0.157	0.152	0.128	0.126	0.107	0.101	0.09	0.089	0.073	0.073	0.062	0.049
PDXP - background	DMSO	0.1655	0.1535	0.14675	0.142	0.132	0.1215	0.08325	0.0755	0.036	0.0375	0.02	0.00425
		0.1525	0.1545	0.14275	0.138	0.122	0.1185	0.08525	0.0765	0.03	0.0315	0.02	-0.00375
	3µM 7.8-DHF	0.1045	0.1015	0.08275	0.08	0.07	0.0635	0.04625	0.0425	0.027	0.0265	0.025	0.01525
		0.0955	0.1035	0.09075	0.082	0.07	0.0605	0.04425	0.0375	0.022	0.0205	0.01	-0.00075
	5µM 7.8-DHF	0.0925	0.0885	0.07575	0.072	0.06	0.0505	0.04725	0.0335	0.016	0.0185	0.015	0.00725
		0.1025	0.0955	0.07475	0.074	0.058	0.0485	0.03625	0.0275	0.014	0.0215	0.012	-0.00075
	10µM 7.8-DHF	0.0755	0.0825	0.06475	0.063	0.052	0.0445	0.03625	0.0335	0.018	0.0175	0.014	0.00825
		0.0935	0.0895	0.06975	0.069	0.053	0.0455	0.03525	0.0345	0.018	0.0185	0.008	-0.00075
Exp5
	PLP(µM)	100	75	50	37.5	25	18.75	12.5	9.375	6.25	4.6875	3.125	0
PDXP	DMSO	0.241	0.224	0.205	0.196	0.179	0.171	0.134	0.124	0.096	0.09	0.074	0.054
		0.219	0.211	0.191	0.19	0.18	0.172	0.119	0.12	0.091	0.085	0.07	0.044
	3µM 7.8-DHF	0.18	0.17	0.148	0.139	0.125	0.117	0.098	0.096	0.082	0.079	0.068	0.057
		0.179	0.169	0.142	0.138	0.126	0.112	0.095	0.089	0.073	0.072	0.07	0.053
	5µM 7.8-DHF	0.174	0.169	0.141	0.142	0.121	0.116	0.099	0.089	0.077	0.075	0.07	0.062
		0.186	0.167	0.141	0.134	0.114	0.113	0.088	0.086	0.075	0.073	0.064	0.052
	10µM 7.8-DHF	0.162	0.159	0.138	0.135	0.118	0.109	0.09	0.086	0.076	0.077	0.072	0.069
		0.172	0.164	0.146	0.134	0.116	0.106	0.084	0.085	0.074	0.072	0.062	0.056
PDXP - background	DMSO	0.1775	0.1615	0.14675	0.139	0.125	0.1155	0.07925	0.0695	0.041	0.0355	0.02	0.00425
		0.1555	0.1485	0.13275	0.133	0.126	0.1165	0.06425	0.0655	0.036	0.0305	0.016	-0.00575
	3µM 7.8-DHF	0.1165	0.1075	0.08975	0.082	0.071	0.0615	0.04325	0.0415	0.027	0.0245	0.014	0.00725
		0.1155	0.1065	0.08375	0.081	0.072	0.0565	0.04025	0.0345	0.018	0.0175	0.016	0.00325
	5µM 7.8-DHF	0.1105	0.1065	0.08275	0.085	0.067	0.0605	0.04425	0.0345	0.022	0.0205	0.016	0.01225
		0.1225	0.1045	0.08275	0.077	0.06	0.0575	0.03325	0.0315	0.02	0.0185	0.01	0.00225
	10µM 7.8-DHF	0.0985	0.0965	0.07975	0.078	0.064	0.0535	0.03525	0.0315	0.021	0.0225	0.018	0.01925
		0.1085	0.1015	0.08775	0.077	0.062	0.0505	0.02925	0.0305	0.019	0.0175	0.008	0.00625
Exp6
	PLP(µM)	100	75	50	37.5	25	18.75	12.5	9.375	6.25	4.6875	3.125	0
PDXP	DMSO	0.243	0.217	0.201	0.192	0.182	0.168	0.139	0.124	0.103	0.093	0.078	0.054
		0.221	0.218	0.203	0.187	0.179	0.158	0.138	0.123	0.099	0.088	0.08	0.045
	3µM 7.8-DHF	0.177	0.16	0.146	0.133	0.123	0.119	0.101	0.096	0.086	0.08	0.075	0.062
		0.178	0.16	0.147	0.135	0.123	0.11	0.103	0.092	0.077	0.072	0.068	0.051
	5µM 7.8-DHF	0.157	0.148	0.135	0.123	0.111	0.102	0.095	0.083	0.078	0.073	0.07	0.06
		0.178	0.153	0.132	0.125	0.112	0.102	0.089	0.084	0.072	0.069	0.063	0.05
	10µM 7.8-DHF	0.155	0.145	0.131	0.121	0.109	0.101	0.085	0.08	0.077	0.073	0.07	0.057
		0.171	0.155	0.139	0.133	0.116	0.104	0.088	0.083	0.077	0.072	0.063	0.048
PDXP - background	DMSO	0.1795	0.1545	0.14275	0.135	0.128	0.1125	0.08425	0.0695	0.048	0.0385	0.024	0.00425
		0.1575	0.1555	0.14475	0.13	0.125	0.1025	0.08325	0.0685	0.044	0.0335	0.026	-0.00475
	3µM 7.8-DHF	0.1135	0.0975	0.08775	0.076	0.069	0.0635	0.04625	0.0415	0.031	0.0255	0.021	0.01225
		0.1145	0.0975	0.08875	0.078	0.069	0.0545	0.04825	0.0375	0.022	0.0175	0.014	0.00125
	5µM 7.8-DHF	0.0935	0.0855	0.07675	0.066	0.057	0.0465	0.04025	0.0285	0.023	0.0185	0.016	0.01025
		0.1145	0.0905	0.07375	0.068	0.058	0.0465	0.03425	0.0295	0.017	0.0145	0.009	0.00025
	10µM 7.8-DHF	0.0915	0.0825	0.07275	0.064	0.055	0.0455	0.03025	0.0255	0.022	0.0185	0.016	0.00725
		0.1075	0.0925	0.08075	0.076	0.062	0.0485	0.03325	0.0285	0.022	0.0175	0.009	-0.00175
	Average
PDXP	DMSO	0.15575	0.1495	0.139333	0.133167	0.123917	0.1125	0.0850833	0.0721667	0.0465833	0.0371667	0.02425	0.00116667
	1µM 7.8-DHF	0.136	0.129	0.118917	0.1045	0.105	0.0903333	0.0690833	0.059	0.0416667	0.0336667	0.0241667	0.00525
	1.5µM 7.8-DHF	0.127333	0.118667	0.110583	0.0975	0.0901667	0.0765	0.06125	0.054	0.038	0.0295	0.022	0.00575
	2µM 7.8-DHF	0.121167	0.1185	0.108917	0.0976667	0.0898333	0.0795	0.05575	0.0525	0.0376667	0.0295	0.021	0.00525
	3µM 7.8-DHF	0.11	0.102333	0.08725	0.0798333	0.0701667	0.06	0.04475	0.0391667	0.0245	0.022	0.0166667	0.00641667
	5µM 7.8-DHF	0.106	0.0951667	0.07775	0.0736667	0.06	0.0516667	0.03925	0.0308333	0.0186667	0.0186667	0.013	0.00525
	10µM 7.8-DHF	0.0958333	0.0908333	0.0759167	0.0711667	0.058	0.048	0.03325	0.0306667	0.02	0.0186667	0.0121667	0.00641667

## Sheet: Kcat
Kcat	0	1µM 7,8-DHF	1,5µM 7,8-DHF	2µM 7,8-DHF	3µM 7,8-DHF	5µM 7,8-DHF	10µM 7,8-DHF		Km	0	1µM 7,8-DHF	1,5µM 7,8-DHF	2µM 7,8-DHF	3µM 7,8-DHF	5µM 7,8-DHF	10µM 7,8-DHF
	0.4866	0.5056	0.4622	0.4272	0.3903	0.391	0.3381			13.08	30.99	32.41	29.18	20.64	28.71	25.47
	0.5688	0.5031	0.5146	0.4557	0.4611	0.4804	0.4391			10.82	11.42	15.89	15.06	29.62	35.18	33.12
	0.542	0.5004	0.4403	0.4655	0.4181	0.4171	0.4054			13.15	13.22	12.3	12.67	24.24	34.99	33.25
	0.6038									16.33
	0.6261									19.15
	0.6137									17.37
	0.5735	0.503033	0.472367	0.449467	0.423167	0.4295	0.3942			14.9833	18.5433	20.2	18.97	24.8333	32.96	30.6133
	0	1µM 7,8-DHF	1,5µM 7,8-DHF	2µM 7,8-DHF	3µM 7,8-DHF	5µM 7,8-DHF	10µM 7,8-DHF		Vmax	0	1µM 7,8-DHF	1,5µM 7,8-DHF	2µM 7,8-DHF	3µM 7,8-DHF	5µM 7,8-DHF	10µM 7,8-DHF
Kcat/Km	37201.8	16314.9	14261	14640.2	18909.9	13618.9	13274.4			917.3	953	871.3	805.4	735.8	737.1	637.3
	52569.3	44054.3	32385.1	30259	15567.2	13655.5	13257.9			1072	948.4	969.9	859.1	869.1	905.6	827.7
	41216.7	37851.7	35796.7	36740.3	17248.3	11920.5	12192.5			1022	943.2	830	877.6	788.2	786.3	764.3
	36974.9									1138
	32694.5									1180
	35331									1157
	39331.4	32740.3	27481	27213.2	17241.8	13065	12908.3			1081.05	948.2	890.4	847.367	797.7	809.667	743.1
						7,8-DHF[µM]	0	1	1.5	2	3	5	10
						Number of values	6	3	3	3	3	3	3
						Vmax [nmol/min/mg]	1081	948.2	890.4	847.4	797.7	809.7	743.1
						Std. Error of Mean	40.49	2.831	41.5	21.65	38.77	50.03	55.98
						Km[µM]	14.98	18.54	20.2	18.97	24.83	32.96	30.61
	OD per min per 0,1µg PDXP					Std. Error of Mean	1.28	6.245	6.192	5.151	2.609	2.126	2.572
	OD=0,17 x phosphate					Kcat	0.57	0.5	0.47	0.45	0.42	0.43	0.39
	conversion OD to nmol P	5.88235				Std. Error of Mean	0.02	0.01	0.02	0.01	0.02	0.03	0.03
	from OD to nmol/mg/min	5882.35				Kcat/Km	39331.4	32740.3	27481	27213.2	17241.8	13065	12908.3
	per g and per second	98039.2				Std. Error of Mean	2880.6	8405.6	6682.9	6559	965	572.3	357.9
	Et (MW PDXP 31828) (concentration of catalytic sites) for 1 g PDXP	3.14189e-05	31418,9 nmol
